# Supplementary material for: Unraveling the surface glycoprotein interaction network by integrating chemical crosslinking with MS-based proteomics
Source: Royal Society of Chemistry journal article supplement (doi:10.1039/d0sc06327d), 2021-01-01
Supplement: d0sc06327d2.xlsx [file d0sc06327d2.xlsx]

## Sheet: All proteins
Table S1(a). Identified and quantified proteins in the experiment
Uniprot ID	Gene Symbol	P Value	Fold Change	Annotation
P60033	CD81	0.000681052	11.159	CD81_HUMAN CD81 antigen
P21926	CD9	0.000405397	9.68559	CD9_HUMAN CD9 antigen
O60669	SLC16A7	0.000232847	9.28229	MOT2_HUMAN Monocarboxylate transporter 2
Q14623	IHH	0.000207024	8.2064	IHH_HUMAN Indian hedgehog protein
P04424	ASL	0.000218822	8.20077	ARLY_HUMAN Argininosuccinate lyase
P05452	CLEC3B	0.0112785	8.16629	TETN_HUMAN Tetranectin
O95471	CLDN7	0.000443517	8.07107	CLD7_HUMAN Claudin-7
Q96S97	MYADM	0.000255535	7.40546	MYADM_HUMAN Myeloid-associated differentiation marker
O14493	CLDN4	0.0100071	6.83163	CLD4_HUMAN Claudin-4
P02774	GC	0.000408714	6.77617	VTDB_HUMAN Vitamin D-binding protein
Q99584	S100A13	0.00438188	6.64482	S10AD_HUMAN Protein S100-A13
Q14802	FXYD3	0.0406537	6.62656	FXYD3_HUMAN FXYD domain-containing ion transport regulator 3
O94979	SEC31A	0.000885442	6.44366	SC31A_HUMAN Protein transport protein Sec31A
P61769	B2M	0.00828076	6.11779	B2MG_HUMAN Beta-2-microglobulin
P01042	KNG1	0.00204942	5.78189	KNG1_HUMAN Kininogen-1
O15427	SLC16A3	0.0045035	5.77616	MOT4_HUMAN Monocarboxylate transporter 4
M0QZQ9	AKAP8L	0.00332652	5.48952	M0QZQ9_HUMAN A-kinase anchor protein 8-like (Fragment)
P07225	PROS1	0.00040438	5.43964	PROS_HUMAN Vitamin K-dependent protein S
Q9NVJ2	ARL8B	0.00576766	5.28004	ARL8B_HUMAN ADP-ribosylation factor-like protein 8B
P35499	SCN4A	0.011534	5.23816	SCN4A_HUMAN Sodium channel protein type 4 subunit alpha
P14209	CD99	0.0034235	5.15928	CD99_HUMAN CD99 antigen
Q96FZ7	CHMP6	0.000796783	5.14061	CHMP6_HUMAN Charged multivesicular body protein 6
P36955	SERPINF1	0.0136066	5.08748	PEDF_HUMAN Pigment epithelium-derived factor
Q96AW1	VOPP1	0.00147635	5.05202	VOPP1_HUMAN Vesicular, overexpressed in cancer, prosurvival protein 1
P20020	ATP2B1	0.000191329	5.03454	AT2B1_HUMAN Plasma membrane calcium-transporting ATPase 1
P05204	HMGN2	0.0342161	5.02544	HMGN2_HUMAN Non-histone chromosomal protein HMG-17
P63092	GNAS	0.000576368	4.91932	GNAS2_HUMAN Guanine nucleotide-binding protein G(s) subunit alpha isoforms short
Q92597	NDRG1	0.00149266	4.8624	NDRG1_HUMAN Protein NDRG1
P02788	LTF	0.00115165	4.85244	TRFL_HUMAN Lactotransferrin
P62491	RAB11A	0.00204334	4.75815	RB11A_HUMAN Ras-related protein Rab-11A
Q8NB49	ATP11C	0.000907277	4.69703	AT11C_HUMAN Probable phospholipid-transporting ATPase IG
P02749	APOH	0.00119404	4.58236	APOH_HUMAN Beta-2-glycoprotein 1
P53985	SLC16A1	0.000871445	4.57477	MOT1_HUMAN Monocarboxylate transporter 1
P17931	LGALS3	0.00138605	4.51123	LEG3_HUMAN Galectin-3
Q8IZN3	ZDHHC14	0.00127806	4.48852	ZDH14_HUMAN Probable palmitoyltransferase ZDHHC14
P18827	SDC1	0.000395704	4.48072	SDC1_HUMAN Syndecan-1
P08758	ANXA5	0.00816282	4.46373	ANXA5_HUMAN Annexin A5
Q7Z5G4	GOLGA7	0.000442425	4.46005	GOGA7_HUMAN Golgin subfamily A member 7
Q8N4S9	MARVELD2	0.00546915	4.45254	MALD2_HUMAN MARVEL domain-containing protein 2
P61019	RAB2A	0.00303837	4.39514	RAB2A_HUMAN Ras-related protein Rab-2A
Q9NUP9	LIN7C	0.0046102	4.33259	LIN7C_HUMAN Protein lin-7 homolog C
Q9Y287	ITM2B	0.00186513	4.32686	ITM2B_HUMAN Integral membrane protein 2B
P34741	SDC2	0.00345995	4.31979	SDC2_HUMAN Syndecan-2
P19823	ITIH2	0.00470815	4.30869	ITIH2_HUMAN Inter-alpha-trypsin inhibitor heavy chain H2
O95562	SFT2D2	0.00291588	4.30612	SFT2B_HUMAN Vesicle transport protein SFT2B
P12259	F5	8.89365e-05	4.24699	FA5_HUMAN Coagulation factor V
P09382	LGALS1	0.000848242	4.20446	LEG1_HUMAN Galectin-1
Q14168	MPP2	0.0123507	4.16391	MPP2_HUMAN MAGUK p55 subfamily member 2
O75787	ATP6AP2	0.00161544	4.14833	RENR_HUMAN Renin receptor
O94985	CLSTN1	0.00258929	4.12136	CSTN1_HUMAN Calsyntenin-1
P02787	TF	0.00138545	4.11459	TRFE_HUMAN Serotransferrin
Q86X29	LSR	0.00300718	4.08527	LSR_HUMAN Lipolysis-stimulated lipoprotein receptor
Q8TF71	SLC16A10	0.0060349	4.06501	MOT10_HUMAN Monocarboxylate transporter 10
A6NIZ1	0	0.000544703	4.02191	RP1BL_HUMAN Ras-related protein Rap-1b-like protein
Q96A59	MARVELD3	0.000732167	3.98351	MALD3_HUMAN MARVEL domain-containing protein 3
P80723	BASP1	0.00407211	3.97273	BASP1_HUMAN Brain acid soluble protein 1
P00747	PLG	0.0273319	3.96846	PLMN_HUMAN Plasminogen
O15551	CLDN3	0.000550288	3.95427	CLD3_HUMAN Claudin-3
P62834	RAP1A	0.00376721	3.95183	RAP1A_HUMAN Ras-related protein Rap-1A
P13164	IFITM1	0.00188053	3.9495	IFM1_HUMAN Interferon-induced transmembrane protein 1
Q86Y82	STX12	0.000338595	3.92429	STX12_HUMAN Syntaxin-12
P05155	SERPING1	0.000668852	3.86506	IC1_HUMAN Plasma protease C1 inhibitor
P05156	CFI	0.00177317	3.81127	CFAI_HUMAN Complement factor I
P0C0L4	C4A	0.00651448	3.78525	CO4A_HUMAN Complement C4-A
P24593	IGFBP5	0.00169364	3.78211	IBP5_HUMAN Insulin-like growth factor-binding protein 5
Q9P0W8	SPATA7	0.00194384	3.74935	SPAT7_HUMAN Spermatogenesis-associated protein 7
Q8N128	FAM177A1	0.000354862	3.70938	F177A_HUMAN Protein FAM177A1
Q96FH0	MEF2BNB	0.000653928	3.70248	MF2NB_HUMAN Protein MEF2BNB
P62879	GNB2	0.0094443	3.68813	GBB2_HUMAN Guanine nucleotide-binding protein G(I)/G(S)/G(T) subunit beta-2
P01008	SERPINC1	0.00264077	3.67744	ANT3_HUMAN Antithrombin-III
P21741	MDK	0.00103863	3.60948	MK_HUMAN Midkine
Q96BI3	APH1A	0.000104568	3.6081	APH1A_HUMAN Gamma-secretase subunit APH-1A
Q15562	TEAD2	0.0335135	3.60051	TEAD2_HUMAN Transcriptional enhancer factor TEF-4
Q9UBS9	SUCO	0.0197865	3.5886	SUCO_HUMAN SUN domain-containing ossification factor
Q15465	SHH	0.0001837	3.57965	SHH_HUMAN Sonic hedgehog protein
P01344	IGF2	0.00102565	3.53074	IGF2_HUMAN Insulin-like growth factor II
O75955	FLOT1	0.0448384	3.50652	FLOT1_HUMAN Flotillin-1
O75056	SDC3	0.000277102	3.50518	SDC3_HUMAN Syndecan-3
P23142	FBLN1	0.00913777	3.49352	FBLN1_HUMAN Fibulin-1
P62873	GNB1	0.00395904	3.48136	GBB1_HUMAN Guanine nucleotide-binding protein G(I)/G(S)/G(T) subunit beta-1
Q9Y625	GPC6	0.000785742	3.45503	GPC6_HUMAN Glypican-6
Q9BRY0	SLC39A3	0.00027313	3.40893	S39A3_HUMAN Zinc transporter ZIP3
Q8N357	SLC35F6	0.0101443	3.40633	S35F6_HUMAN Solute carrier family 35 member F6
P49006	MARCKSL1	0.00207788	3.36508	MRP_HUMAN MARCKS-related protein
P16520	GNB3	7.94072e-05	3.36359	GBB3_HUMAN Guanine nucleotide-binding protein G(I)/G(S)/G(T) subunit beta-3
Q12891	HYAL2	3.57866e-05	3.36077	HYAL2_HUMAN Hyaluronidase-2
Q9H2A7	CXCL16	0.0172246	3.35883	CXL16_HUMAN C-X-C motif chemokine 16
P08133	ANXA6	0.000990535	3.35658	ANXA6_HUMAN Annexin A6
P51151	RAB9A	0.00502597	3.35241	RAB9A_HUMAN Ras-related protein Rab-9A
P31431	SDC4	0.000668667	3.33124	SDC4_HUMAN Syndecan-4
Q9Y3D6	FIS1	0.0176543	3.26235	FIS1_HUMAN Mitochondrial fission 1 protein
P61225	RAP2B	0.00160288	3.25846	RAP2B_HUMAN Ras-related protein Rap-2b
Q16625	OCLN	0.00116896	3.256	OCLN_HUMAN Occludin
Q5T2T1	MPP7	0.00205532	3.25318	MPP7_HUMAN MAGUK p55 subfamily member 7
Q96RV3	PCNX	0.00389448	3.24991	PCX1_HUMAN Pecanex-like protein 1
P27449	ATP6V0C	0.00278407	3.24966	VATL_HUMAN V-type proton ATPase 16 kDa proteolipid subunit
Q6UWI4	SHISA2	0.00462296	3.24093	SHSA2_HUMAN Protein shisa-2 homolog
Q9NUE0	ZDHHC18	0.0020957	3.22085	ZDH18_HUMAN Palmitoyltransferase ZDHHC18
Q00688	FKBP3	0.0214437	3.21803	FKBP3_HUMAN Peptidyl-prolyl cis-trans isomerase FKBP3
O95484	CLDN9	0.00369573	3.21618	CLD9_HUMAN Claudin-9
P01034	CST3	0.00191796	3.19118	CYTC_HUMAN Cystatin-C
Q99653	CHP1	0.00333365	3.17871	CHP1_HUMAN Calcineurin B homologous protein 1
P10114	RAP2A	0.0094973	3.1465	RAP2A_HUMAN Ras-related protein Rap-2a
Q9Y397	ZDHHC9	0.00206895	3.12763	ZDHC9_HUMAN Palmitoyltransferase ZDHHC9
B9EJG8	TMEM150C	0.0037914	3.12235	T150C_HUMAN Transmembrane protein 150C
P15559	NQO1	0.00099901	3.0985	NQO1_HUMAN NAD(P)H dehydrogenase [quinone] 1
P51511	MMP15	0.00899891	3.08305	MMP15_HUMAN Matrix metalloproteinase-15
Q02790	FKBP4	0.00273439	3.07767	FKBP4_HUMAN Peptidyl-prolyl cis-trans isomerase FKBP4
P01024	C3	0.00505103	3.07143	CO3_HUMAN Complement C3
Q9UBI6	GNG12	0.000301578	3.05862	GBG12_HUMAN Guanine nucleotide-binding protein G(I)/G(S)/G(O) subunit gamma-12
P61224	RAP1B	0.000233475	3.04882	RAP1B_HUMAN Ras-related protein Rap-1b
P20827	EFNA1	0.000354838	3.0409	EFNA1_HUMAN Ephrin-A1
O14556	GAPDHS	0.00421813	3.02986	G3PT_HUMAN Glyceraldehyde-3-phosphate dehydrogenase, testis-specific
Q9UPI3	FLVCR2	0.00177959	3.02908	FLVC2_HUMAN Feline leukemia virus subgroup C receptor-related protein 2
Q5SQS7	SH2D4B	0.0142738	3.02558	SH24B_HUMAN SH2 domain-containing protein 4B
P01033	TIMP1	0.0100358	3.00141	TIMP1_HUMAN Metalloproteinase inhibitor 1
O95456	PSMG1	0.0124434	2.97659	PSMG1_HUMAN Proteasome assembly chaperone 1
Q9H4G4	GLIPR2	0.00280304	2.9643	GAPR1_HUMAN Golgi-associated plant pathogenesis-related protein 1
P54803	GALC	0.00351374	2.93842	GALC_HUMAN Galactocerebrosidase
Q15149	PLEC	0.0216257	2.92988	PLEC_HUMAN Plectin
P12268	IMPDH2	0.0296353	2.92411	IMDH2_HUMAN Inosine-5'-monophosphate dehydrogenase 2
Q9NPI0	TMEM138	0.000360429	2.92045	TM138_HUMAN Transmembrane protein 138
Q96FE7	PIK3IP1	0.00420814	2.91555	P3IP1_HUMAN Phosphoinositide-3-kinase-interacting protein 1
Q9H6L2	TMEM231	0.00196228	2.9144	TM231_HUMAN Transmembrane protein 231
P35221	CTNNA1	0.0020424	2.90752	CTNA1_HUMAN Catenin alpha-1
B9A064	IGLL5	0.00592011	2.9043	IGLL5_HUMAN Immunoglobulin lambda-like polypeptide 5
Q8N1F8	STK11IP	0.00650849	2.90219	S11IP_HUMAN Serine/threonine-protein kinase 11-interacting protein
O15027	SEC16A	0.00202932	2.89192	SC16A_HUMAN Protein transport protein Sec16A
P61421	ATP6V0D1	0.00767538	2.88204	VA0D1_HUMAN V-type proton ATPase subunit d 1
P29373	CRABP2	0.0127008	2.87167	RABP2_HUMAN Cellular retinoic acid-binding protein 2
P49747	COMP	0.0132947	2.84262	COMP_HUMAN Cartilage oligomeric matrix protein
Q06033	ITIH3	0.00532219	2.84207	ITIH3_HUMAN Inter-alpha-trypsin inhibitor heavy chain H3
P36897	TGFBR1	0.00278959	2.82376	TGFR1_HUMAN TGF-beta receptor type-1
O95807	TMEM50A	0.00188525	2.80074	TM50A_HUMAN Transmembrane protein 50A
Q6PJF5	RHBDF2	0.000680143	2.79063	RHDF2_HUMAN Inactive rhomboid protein 2
Q5H9U9	DDX60L	0.00463842	2.77864	DDX6L_HUMAN Probable ATP-dependent RNA helicase DDX60-like
P12429	ANXA3	0.000179007	2.77818	ANXA3_HUMAN Annexin A3
P50552	VASP	0.0163949	2.77162	VASP_HUMAN Vasodilator-stimulated phosphoprotein
Q6PJG6	BRAT1	0.000333664	2.73616	BRAT1_HUMAN BRCA1-associated ATM activator 1
Q6XYQ8	SYT10	0.000523106	2.73236	SYT10_HUMAN Synaptotagmin-10
Q7L1W4	LRRC8D	0.00358649	2.71859	LRC8D_HUMAN Leucine-rich repeat-containing protein 8D
P69905	HBA1	0.0282625	2.71498	HBA_HUMAN Hemoglobin subunit alpha
P18065	IGFBP2	0.00234175	2.70829	IBP2_HUMAN Insulin-like growth factor-binding protein 2
Q3ZCQ3	FAM174B	0.000460384	2.70388	F174B_HUMAN Membrane protein FAM174B
P00734	F2	0.00264966	2.7035	THRB_HUMAN Prothrombin
P57729	RAB38	0.000409251	2.69404	RAB38_HUMAN Ras-related protein Rab-38
P19827	ITIH1	0.0291119	2.67354	ITIH1_HUMAN Inter-alpha-trypsin inhibitor heavy chain H1
P61586	RHOA	0.00941152	2.66056	RHOA_HUMAN Transforming protein RhoA
Q92896	GLG1	0.00244472	2.65997	GSLG1_HUMAN Golgi apparatus protein 1
O15400	STX7	0.00135129	2.65778	STX7_HUMAN Syntaxin-7
O14763	TNFRSF10B	0.00469937	2.65424	TR10B_HUMAN Tumor necrosis factor receptor superfamily member 10B
Q9H0U4	RAB1B	0.00325859	2.64642	RAB1B_HUMAN Ras-related protein Rab-1B
Q13492	PICALM	0.0177133	2.63732	PICAL_HUMAN Phosphatidylinositol-binding clathrin assembly protein
P26196	DDX6	0.0454925	2.63005	DDX6_HUMAN Probable ATP-dependent RNA helicase DDX6
P08134	RHOC	8.32588e-05	2.62786	RHOC_HUMAN Rho-related GTP-binding protein RhoC
Q9HA72	CALHM2	0.00215338	2.62637	CAHM2_HUMAN Calcium homeostasis modulator protein 2
P98196	ATP11A	0.00187659	2.61531	AT11A_HUMAN Probable phospholipid-transporting ATPase IH
P36543	ATP6V1E1	0.0109471	2.60729	VATE1_HUMAN V-type proton ATPase subunit E 1
P61204	ARF3	0.00928154	2.60608	ARF3_HUMAN ADP-ribosylation factor 3
Q53RY4	KRTCAP3	0.000874098	2.60214	KCP3_HUMAN Keratinocyte-associated protein 3
Q9UL26	RAB22A	0.00429596	2.60185	RB22A_HUMAN Ras-related protein Rab-22A
P10619	CTSA	0.00181589	2.6005	PPGB_HUMAN Lysosomal protective protein
P15514	AREG	0.0225964	2.59868	AREG_HUMAN Amphiregulin
P07948	LYN	0.00351334	2.59481	LYN_HUMAN Tyrosine-protein kinase Lyn
Q9Y3L5	RAP2C	0.00302538	2.59138	RAP2C_HUMAN Ras-related protein Rap-2c
Q8WZ42	TTN	5.76076e-05	2.58969	TITIN_HUMAN Titin
P04632	CAPNS1	0.00423341	2.58048	CPNS1_HUMAN Calpain small subunit 1
P07355	ANXA2	0.000816676	2.57601	ANXA2_HUMAN Annexin A2
Q99623	PHB2	0.023334	2.57293	PHB2_HUMAN Prohibitin-2
P05067	APP	0.021208	2.56851	A4_HUMAN Amyloid beta A4 protein
P13637	ATP1A3	0.000141482	2.56545	AT1A3_HUMAN Sodium/potassium-transporting ATPase subunit alpha-3
P04406	GAPDH	0.017033	2.56172	G3P_HUMAN Glyceraldehyde-3-phosphate dehydrogenase
H7C2T4	SPRED2	0.00428815	2.55849	H7C2T4_HUMAN Sprouty-related, EVH1 domain-containing protein 2 (Fragment)
O95716	RAB3D	0.00597297	2.55801	RAB3D_HUMAN Ras-related protein Rab-3D
P10319	HLA-B	0.0111913	2.55492	1B58_HUMAN HLA class I histocompatibility antigen, B-58 alpha chain
O95837	GNA14	0.00607785	2.55414	GNA14_HUMAN Guanine nucleotide-binding protein subunit alpha-14
P09525	ANXA4	0.00451367	2.55202	ANXA4_HUMAN Annexin A4
Q15056	EIF4H	0.0338275	2.54912	IF4H_HUMAN Eukaryotic translation initiation factor 4H
Q96QK1	VPS35	0.00817636	2.54266	VPS35_HUMAN Vacuolar protein sorting-associated protein 35
Q9UBH6	XPR1	0.00486374	2.54041	XPR1_HUMAN Xenotropic and polytropic retrovirus receptor 1
Q99536	VAT1	0.00340949	2.52876	VAT1_HUMAN Synaptic vesicle membrane protein VAT-1 homolog
Q9GZU7	CTDSP1	0.000658825	2.52629	CTDS1_HUMAN Carboxy-terminal domain RNA polymerase II polypeptide A small phosphatase 1
O75487	GPC4	0.0124337	2.52372	GPC4_HUMAN Glypican-4
O00214	LGALS8	0.0122169	2.51833	LEG8_HUMAN Galectin-8
P22692	IGFBP4	0.00322671	2.50917	IBP4_HUMAN Insulin-like growth factor-binding protein 4
P23634	ATP2B4	0.00180751	2.5029	AT2B4_HUMAN Plasma membrane calcium-transporting ATPase 4
Q14254	FLOT2	0.00371826	2.49628	FLOT2_HUMAN Flotillin-2
P17612	PRKACA	0.00406902	2.49545	KAPCA_HUMAN cAMP-dependent protein kinase catalytic subunit alpha
Q14160	SCRIB	0.00606541	2.49545	SCRIB_HUMAN Protein scribble homolog
Q15286	RAB35	0.00420117	2.48337	RAB35_HUMAN Ras-related protein Rab-35
A8MTJ3	GNAT3	0.00107518	2.4811	GNAT3_HUMAN Guanine nucleotide-binding protein G(t) subunit alpha-3
P53675	CLTCL1	0.0105005	2.46535	CLH2_HUMAN Clathrin heavy chain 2
P35670	ATP7B	0.00527667	2.46441	ATP7B_HUMAN Copper-transporting ATPase 2
P46940	IQGAP1	0.00244534	2.45988	IQGA1_HUMAN Ras GTPase-activating-like protein IQGAP1
Q9NQ11	ATP13A2	0.00810177	2.45627	AT132_HUMAN Probable cation-transporting ATPase 13A2
P01111	NRAS	0.0173904	2.44715	RASN_HUMAN GTPase NRas
P50991	CCT4	0.00605913	2.44613	TCPD_HUMAN T-complex protein 1 subunit delta
O15020	SPTBN2	0.00569771	2.44391	SPTN2_HUMAN Spectrin beta chain, non-erythrocytic 2
P17987	TCP1	0.0105752	2.44369	TCPA_HUMAN T-complex protein 1 subunit alpha
Q9UEU0	VTI1B	0.00209807	2.43213	VTI1B_HUMAN Vesicle transport through interaction with t-SNAREs homolog 1B
Q9P296	C5AR2	0.00962809	2.41756	C5AR2_HUMAN C5a anaphylatoxin chemotactic receptor 2
P35232	PHB	0.0397393	2.40064	PHB_HUMAN Prohibitin
P50148	GNAQ	0.00276312	2.39703	GNAQ_HUMAN Guanine nucleotide-binding protein G(q) subunit alpha
Q14103	HNRNPD	0.0377938	2.39637	HNRPD_HUMAN Heterogeneous nuclear ribonucleoprotein D0
O43520	ATP8B1	0.00122987	2.39247	AT8B1_HUMAN Probable phospholipid-transporting ATPase IC
Q9H8M5	CNNM2	0.00704369	2.378	CNNM2_HUMAN Metal transporter CNNM2
P51149	RAB7A	0.00698795	2.37285	RAB7A_HUMAN Ras-related protein Rab-7a
O43493	TGOLN2	0.00364141	2.3657	TGON2_HUMAN Trans-Golgi network integral membrane protein 2
A6NFQ2	FAM115C	0.00329663	2.35612	F115C_HUMAN Protein FAM115C
P45877	PPIC	0.00518633	2.35233	PPIC_HUMAN Peptidyl-prolyl cis-trans isomerase C
Q8IWB9	TEX2	0.00529895	2.34718	TEX2_HUMAN Testis-expressed sequence 2 protein
Q9H3M7	TXNIP	0.00215789	2.33885	TXNIP_HUMAN Thioredoxin-interacting protein
P05023	ATP1A1	0.0057779	2.33827	AT1A1_HUMAN Sodium/potassium-transporting ATPase subunit alpha-1
Q96EI5	TCEAL4	0.0405537	2.3284	TCAL4_HUMAN Transcription elongation factor A protein-like 4
Q13214	SEMA3B	0.00953916	2.3283	SEM3B_HUMAN Semaphorin-3B
P07384	CAPN1	0.000116571	2.31967	CAN1_HUMAN Calpain-1 catalytic subunit
P15313	ATP6V1B1	0.00128911	2.31781	VATB1_HUMAN V-type proton ATPase subunit B, kidney isoform
Q05639	EEF1A2	0.0088184	2.31375	EF1A2_HUMAN Elongation factor 1-alpha 2
O14745	SLC9A3R1	0.000902942	2.31035	NHRF1_HUMAN Na(+)/H(+) exchange regulatory cofactor NHE-RF1
O43399	TPD52L2	0.017684	2.30764	TPD54_HUMAN Tumor protein D54
P01031	C5	0.0248714	2.3075	CO5_HUMAN Complement C5
O60449	LY75	0.0022895	2.3059	LY75_HUMAN Isoform 2 of Lymphocyte antigen 75
A2BFH1	PPIAL4G	0.040168	2.30405	PAL4G_HUMAN Peptidyl-prolyl cis-trans isomerase A-like 4G
P46459	NSF	0.00325462	2.29803	NSF_HUMAN Vesicle-fusing ATPase
P61006	RAB8A	0.00512566	2.29398	RAB8A_HUMAN Ras-related protein Rab-8A
P02008	HBZ	0.0293806	2.29213	HBAZ_HUMAN Hemoglobin subunit zeta
Q658P3	STEAP3	0.00321447	2.28195	STEA3_HUMAN Metalloreductase STEAP3
Q10570	CPSF1	0.0411112	2.2814	CPSF1_HUMAN Cleavage and polyadenylation specificity factor subunit 1
O60423	ATP8B3	0.0187396	2.28085	AT8B3_HUMAN Probable phospholipid-transporting ATPase IK
O75509	TNFRSF21	0.0287833	2.28039	TNR21_HUMAN Tumor necrosis factor receptor superfamily member 21
P49748	ACADVL	0.00870783	2.27882	ACADV_HUMAN Very long-chain specific acyl-CoA dehydrogenase, mitochondrial
P15311	EZR	0.00506069	2.26913	EZRI_HUMAN Ezrin
P04222	HLA-C	0.00065268	2.26905	1C03_HUMAN HLA class I histocompatibility antigen, Cw-3 alpha chain
P30086	PEBP1	0.0399485	2.26572	PEBP1_HUMAN Phosphatidylethanolamine-binding protein 1
P61106	RAB14	0.0139856	2.2578	RAB14_HUMAN Ras-related protein Rab-14
P62820	RAB1A	0.0099033	2.25694	RAB1A_HUMAN Ras-related protein Rab-1A
P35475	IDUA	0.00844073	2.2528	IDUA_HUMAN Alpha-L-iduronidase
P16455	MGMT	0.00947109	2.24619	MGMT_HUMAN Methylated-DNA--protein-cysteine methyltransferase
Q99426	TBCB	0.00548454	2.24078	TBCB_HUMAN Tubulin-folding cofactor B
Q01082	SPTBN1	0.01585	2.2365	SPTB2_HUMAN Spectrin beta chain, non-erythrocytic 1
P26572	MGAT1	0.036637	2.23583	MGAT1_HUMAN Alpha-1,3-mannosyl-glycoprotein 2-beta-N-acetylglucosaminyltransferase
Q13505	MTX1	0.0104853	2.23001	MTX1_HUMAN Metaxin-1
P48740	MASP1	0.00290864	2.21413	MASP1_HUMAN Mannan-binding lectin serine protease 1
Q7Z406	MYH14	0.0289075	2.20575	MYH14_HUMAN Myosin-14
Q71RC9	SMIM5	0.0110479	2.20541	SMIM5_HUMAN Small integral membrane protein 5
P38606	ATP6V1A	0.00867481	2.20459	VATA_HUMAN V-type proton ATPase catalytic subunit A
Q9BSK0	MARVELD1	0.00512142	2.19987	MALD1_HUMAN MARVEL domain-containing protein 1
Q9H3U5	MFSD1	0.00505918	2.19806	MFSD1_HUMAN Major facilitator superfamily domain-containing protein 1
P18085	ARF4	0.0120047	2.18754	ARF4_HUMAN ADP-ribosylation factor 4
Q99988	GDF15	0.00495484	2.18409	GDF15_HUMAN Growth/differentiation factor 15
Q12974	PTP4A2	0.00241018	2.18348	TP4A2_HUMAN Protein tyrosine phosphatase type IVA 2
Q13443	ADAM9	0.00550073	2.18307	ADAM9_HUMAN Disintegrin and metalloproteinase domain-containing protein 9
P48643	CCT5	0.0260495	2.18286	TCPE_HUMAN T-complex protein 1 subunit epsilon
Q8NES3	LFNG	0.00583848	2.17852	LFNG_HUMAN Beta-1,3-N-acetylglucosaminyltransferase lunatic fringe
Q8N114	SHISA5	0.00102527	2.16989	SHSA5_HUMAN Protein shisa-5
Q6P1K1	SLC48A1	0.000406041	2.1664	HRG1_HUMAN Heme transporter HRG1
O75110	ATP9A	0.00522011	2.16523	ATP9A_HUMAN Probable phospholipid-transporting ATPase IIA
P30542	ADORA1	0.00590527	2.16153	AA1R_HUMAN Adenosine receptor A1
O00391	QSOX1	0.0100318	2.15753	QSOX1_HUMAN Sulfhydryl oxidase 1
Q9NU53	GINM1	0.00507178	2.15518	GINM1_HUMAN Glycoprotein integral membrane protein 1
Q8IZF3	GPR115	0.00225087	2.14977	GP115_HUMAN Probable G-protein coupled receptor 115
P11233	RALA	0.0144089	2.14887	RALA_HUMAN Ras-related protein Ral-A
Q9UL25	RAB21	0.0112512	2.14172	RAB21_HUMAN Ras-related protein Rab-21
Q99732	LITAF	0.00546173	2.13896	LITAF_HUMAN Lipopolysaccharide-induced tumor necrosis factor-alpha factor
Q02809	PLOD1	0.00438814	2.13427	PLOD1_HUMAN Procollagen-lysine,2-oxoglutarate 5-dioxygenase 1
P61020	RAB5B	0.00560286	2.12945	RAB5B_HUMAN Ras-related protein Rab-5B
P16471	PRLR	0.00106618	2.1241	PRLR_HUMAN Prolactin receptor
P11166	SLC2A1	0.00815211	2.12363	GTR1_HUMAN Solute carrier family 2, facilitated glucose transporter member 1
Q12846	STX4	0.00718936	2.11648	STX4_HUMAN Syntaxin-4
Q9NZM1	MYOF	0.00276554	2.11641	MYOF_HUMAN Myoferlin
Q8IXU6	SLC35F2	0.0230271	2.11475	S35F2_HUMAN Solute carrier family 35 member F2
Q709F0	ACAD11	0.0300718	2.11168	ACD11_HUMAN Acyl-CoA dehydrogenase family member 11
P84085	ARF5	0.016065	2.11127	ARF5_HUMAN ADP-ribosylation factor 5
Q96DA2	RAB39B	0.00138455	2.10364	RB39B_HUMAN Ras-related protein Rab-39B
P06396	GSN	0.0293056	2.10258	GELS_HUMAN Gelsolin
P51153	RAB13	0.00031273	2.0975	RAB13_HUMAN Ras-related protein Rab-13
P49792	RANBP2	0.040023	2.09609	RBP2_HUMAN E3 SUMO-protein ligase RanBP2
Q12805	EFEMP1	0.012256	2.09408	FBLN3_HUMAN EGF-containing fibulin-like extracellular matrix protein 1
Q96A65	EXOC4	0.00484184	2.0934	EXOC4_HUMAN Exocyst complex component 4
P29966	MARCKS	0.0003476	2.0929	MARCS_HUMAN Myristoylated alanine-rich C-kinase substrate
Q9Y5G0	PCDHGB5	0.00448167	2.09175	PCDGH_HUMAN Protocadherin gamma-B5
Q8NET8	TRPV3	0.00495827	2.08865	TRPV3_HUMAN Transient receptor potential cation channel subfamily V member 3
O00220	TNFRSF10A	0.00153723	2.08583	TR10A_HUMAN Tumor necrosis factor receptor superfamily member 10A
O75155	CAND2	0.00841434	2.08563	CAND2_HUMAN Cullin-associated NEDD8-dissociated protein 2
Q13616	CUL1	0.00252592	2.08425	CUL1_HUMAN Cullin-1
Q92854	SEMA4D	0.0230935	2.07842	SEM4D_HUMAN Semaphorin-4D
Q96HA4	C1orf159	0.0261487	2.07598	CA159_HUMAN Uncharacterized protein C1orf159
O94907	DKK1	0.00178004	2.07451	DKK1_HUMAN Dickkopf-related protein 1
O14980	XPO1	0.00127862	2.06672	XPO1_HUMAN Exportin-1
P42785	PRCP	0.0084417	2.06614	PCP_HUMAN Lysosomal Pro-X carboxypeptidase
P50990	CCT8	0.00391562	2.06564	TCPQ_HUMAN T-complex protein 1 subunit theta
Q13637	RAB32	0.0334989	2.06558	RAB32_HUMAN Ras-related protein Rab-32
P78368	CSNK1G2	0.000603796	2.06225	KC1G2_HUMAN Casein kinase I isoform gamma-2
Q92930	RAB8B	0.00939291	2.05955	RAB8B_HUMAN Ras-related protein Rab-8B
Q6N069	NAA16	0.00995543	2.05561	NAA16_HUMAN N-alpha-acetyltransferase 16, NatA auxiliary subunit
O60911	CTSV	5.16916e-05	2.05324	CATL2_HUMAN Cathepsin L2
B2RUZ4	SMIM1	8.64888e-05	2.05235	SMIM1_HUMAN Small integral membrane protein 1
Q7L576	CYFIP1	0.000476848	2.05093	CYFP1_HUMAN Cytoplasmic FMR1-interacting protein 1
O14787	TNPO2	0.0222418	2.04927	TNPO2_HUMAN Transportin-2
B4DQW3	PVRL4	0.00511317	2.0451	B4DQW3_HUMAN Poliovirus receptor-related protein 4
Q14766	LTBP1	0.00892627	2.04421	LTBP1_HUMAN Latent-transforming growth factor beta-binding protein 1
Q15386	UBE3C	0.00498161	2.04085	UBE3C_HUMAN Ubiquitin-protein ligase E3C
Q13642	FHL1	0.00698409	2.03557	FHL1_HUMAN Four and a half LIM domains protein 1
P35241	RDX	0.0149855	2.02862	RADI_HUMAN Radixin
Q4ZG55	GREB1	0.0280543	2.02847	GREB1_HUMAN Protein GREB1
Q13491	GPM6B	0.00511446	2.02845	GPM6B_HUMAN Isoform 4 of Neuronal membrane glycoprotein M6-b
Q9Y2A7	NCKAP1	0.00852452	2.02781	NCKP1_HUMAN Nck-associated protein 1
Q96SL1	DIRC2	0.00406303	2.02228	DIRC2_HUMAN Disrupted in renal carcinoma protein 2
Q9HB71	CACYBP	0.0353256	2.02202	CYBP_HUMAN Calcyclin-binding protein
Q9BV40	VAMP8	0.00027232	2.02144	VAMP8_HUMAN Vesicle-associated membrane protein 8
Q9NY26	SLC39A1	0.00246292	2.01819	S39A1_HUMAN Zinc transporter ZIP1
Q9NSD9	FARSB	0.0122448	2.01759	SYFB_HUMAN Phenylalanine--tRNA ligase beta subunit
Q8NC54	KCT2	0.00309193	2.00924	KCT2_HUMAN Keratinocyte-associated transmembrane protein 2
Q8N565	MREG	0.0094938	2.00804	MREG_HUMAN Melanoregulin
Q8IUW5	RELL1	0.0014646	2.00469	RELL1_HUMAN RELT-like protein 1
Q01970	PLCB3	0.00326806	2.00141	PLCB3_HUMAN 1-phosphatidylinositol 4,5-bisphosphate phosphodiesterase beta-3
Q0VD83	APOBR	0.0170063	1.99884	APOBR_HUMAN Apolipoprotein B receptor
P23468	PTPRD	0.00417215	1.998	PTPRD_HUMAN Receptor-type tyrosine-protein phosphatase delta
P61088	UBE2N	0.0194169	1.99751	UBE2N_HUMAN Ubiquitin-conjugating enzyme E2 N
O95528	SLC2A10	0.0170271	1.99701	GTR10_HUMAN Solute carrier family 2, facilitated glucose transporter member 10
P35625	TIMP3	0.00236434	1.99697	TIMP3_HUMAN Metalloproteinase inhibitor 3
P26640	VARS	0.00376383	1.99659	SYVC_HUMAN Valine--tRNA ligase
O00763	ACACB	0.00329822	1.99427	ACACB_HUMAN Acetyl-CoA carboxylase 2
Q8TCU6	PREX1	0.00228292	1.99185	PREX1_HUMAN Phosphatidylinositol 3,4,5-trisphosphate-dependent Rac exchanger 1 protein
P55160	NCKAP1L	0.00779794	1.99108	NCKPL_HUMAN Nck-associated protein 1-like
P02656	APOC3	0.0287727	1.99085	APOC3_HUMAN Apolipoprotein C-III
P07602	PSAP	0.00309386	1.98974	SAP_HUMAN Prosaposin
P07814	EPRS	0.026759	1.9864	SYEP_HUMAN Bifunctional glutamate/proline--tRNA ligase
O95071	UBR5	0.00448229	1.98631	UBR5_HUMAN E3 ubiquitin-protein ligase UBR5
Q8IY95	TMEM192	0.00833201	1.98487	TM192_HUMAN Transmembrane protein 192
P16278	GLB1	0.000446642	1.9846	BGAL_HUMAN Beta-galactosidase
P26232	CTNNA2	0.00275245	1.98421	CTNA2_HUMAN Catenin alpha-2
Q6Y2X3	DNAJC14	0.0033512	1.98175	DJC14_HUMAN DnaJ homolog subfamily C member 14
Q96A22	C11orf52	0.0119801	1.97982	CK052_HUMAN Uncharacterized protein C11orf52
P0CG47	UBB	3.00241e-05	1.97881	UBB_HUMAN Polyubiquitin-B
P02042	HBD	0.0163599	1.97834	HBD_HUMAN Hemoglobin subunit delta
Q12955	ANK3	0.00313119	1.97312	ANK3_HUMAN Ankyrin-3
P05771	PRKCB	0.000872951	1.97252	KPCB_HUMAN Protein kinase C beta type
Q96RT1	ERBB2IP	0.031413	1.97199	LAP2_HUMAN Protein LAP2
Q9Y4D1	DAAM1	0.0262567	1.96681	DAAM1_HUMAN Disheveled-associated activator of morphogenesis 1
Q96CW1	AP2M1	0.00664967	1.96341	AP2M1_HUMAN AP-2 complex subunit mu
Q9Y446	PKP3	0.0211378	1.96314	PKP3_HUMAN Plakophilin-3
Q96CC6	RHBDF1	0.00407699	1.96305	RHDF1_HUMAN Inactive rhomboid protein 1
O14773	TPP1	0.00620226	1.96305	TPP1_HUMAN Tripeptidyl-peptidase 1
Q13813	SPTAN1	0.0407127	1.96101	SPTN1_HUMAN Spectrin alpha chain, non-erythrocytic 1
Q96BM9	ARL8A	0.00764152	1.95967	ARL8A_HUMAN ADP-ribosylation factor-like protein 8A
Q9H2V7	SPNS1	0.0169434	1.95927	SPNS1_HUMAN Protein spinster homolog 1
Q9UQ80	PA2G4	0.0283302	1.95575	PA2G4_HUMAN Proliferation-associated protein 2G4
P49810	PSEN2	0.0017233	1.95399	PSN2_HUMAN Presenilin-2
O00186	STXBP3	0.00764082	1.95325	STXB3_HUMAN Syntaxin-binding protein 3
Q14344	GNA13	0.00334264	1.95268	GNA13_HUMAN Guanine nucleotide-binding protein subunit alpha-13
P08754	GNAI3	0.00500691	1.95049	GNAI3_HUMAN Guanine nucleotide-binding protein G(k) subunit alpha
Q9NWW5	CLN6	0.033305	1.94963	CLN6_HUMAN Ceroid-lipofuscinosis neuronal protein 6
P55060	CSE1L	0.012229	1.94839	XPO2_HUMAN Exportin-2
P30511	HLA-F	0.0107307	1.94788	HLAF_HUMAN HLA class I histocompatibility antigen, alpha chain F
P36957	DLST	0.0327854	1.94648	ODO2_HUMAN Dihydrolipoyllysine-residue succinyltransferase component of 2-oxoglutarate dehydrogenase complex, mitochondrial
Q86XI2	NCAPG2	0.00645402	1.94352	CNDG2_HUMAN Condensin-2 complex subunit G2
Q969Z4	RELT	0.0172842	1.9427	TR19L_HUMAN Tumor necrosis factor receptor superfamily member 19L
P31689	DNAJA1	0.0460543	1.94252	DNJA1_HUMAN DnaJ homolog subfamily A member 1
Q05655	PRKCD	0.0167128	1.93934	KPCD_HUMAN Protein kinase C delta type
O43861	ATP9B	0.0307015	1.93858	ATP9B_HUMAN Probable phospholipid-transporting ATPase IIB
Q6P4A8	PLBD1	0.00592871	1.93304	PLBL1_HUMAN Phospholipase B-like 1
Q8N3U4	STAG2	0.030297	1.93178	STAG2_HUMAN Cohesin subunit SA-2
Q13145	BAMBI	0.00585626	1.92938	BAMBI_HUMAN BMP and activin membrane-bound inhibitor homolog
O75923	DYSF	0.0119649	1.92623	DYSF_HUMAN Dysferlin
P54756	EPHA5	0.00105148	1.92528	EPHA5_HUMAN Ephrin type-A receptor 5
P51148	RAB5C	0.0239398	1.92383	RAB5C_HUMAN Ras-related protein Rab-5C
Q9UGV2	NDRG3	0.0128086	1.92363	NDRG3_HUMAN Protein NDRG3
Q9ULT8	HECTD1	0.00257881	1.91547	HECD1_HUMAN E3 ubiquitin-protein ligase HECTD1
P51809	VAMP7	0.00344993	1.91354	VAMP7_HUMAN Vesicle-associated membrane protein 7
Q6P1N0	CC2D1A	0.0240276	1.91351	C2D1A_HUMAN Coiled-coil and C2 domain-containing protein 1A
Q92928	RAB1C	0.00102676	1.91321	RAB1C_HUMAN Putative Ras-related protein Rab-1C
P02760	AMBP	0.0133015	1.90975	AMBP_HUMAN Protein AMBP
Q9BY78	RNF26	0.00529481	1.90935	RNF26_HUMAN RING finger protein 26
Q9Y6D6	ARFGEF1	0.00619085	1.90934	BIG1_HUMAN Brefeldin A-inhibited guanine nucleotide-exchange protein 1
Q96GS4	C17orf59	0.00305302	1.90895	CQ059_HUMAN Uncharacterized protein C17orf59
Q09666	AHNAK	0.00293833	1.90735	AHNK_HUMAN Neuroblast differentiation-associated protein AHNAK
Q9Y519	TMEM184B	0.00605132	1.90339	T184B_HUMAN Transmembrane protein 184B
Q7Z460	CLASP1	0.00934932	1.90327	CLAP1_HUMAN CLIP-associating protein 1
Q14108	SCARB2	0.0180759	1.90059	SCRB2_HUMAN Lysosome membrane protein 2
Q14956	GPNMB	0.0393731	1.89757	GPNMB_HUMAN Transmembrane glycoprotein NMB
O15127	SCAMP2	0.00760151	1.89509	SCAM2_HUMAN Secretory carrier-associated membrane protein 2
Q14152	EIF3A	0.0023167	1.89492	EIF3A_HUMAN Eukaryotic translation initiation factor 3 subunit A
Q7KZF4	SND1	0.0183324	1.8945	SND1_HUMAN Staphylococcal nuclease domain-containing protein 1
Q96KR4	LMLN	0.00228828	1.89048	LMLN_HUMAN Leishmanolysin-like peptidase
O94973	AP2A2	0.0245867	1.88437	AP2A2_HUMAN AP-2 complex subunit alpha-2
P35222	CTNNB1	0.00125545	1.88371	CTNB1_HUMAN Catenin beta-1
O95373	IPO7	0.00689176	1.88122	IPO7_HUMAN Importin-7
P21291	CSRP1	0.0459251	1.88052	CSRP1_HUMAN Cysteine and glycine-rich protein 1
P41252	IARS	0.00606471	1.88035	SYIC_HUMAN Isoleucine--tRNA ligase, cytoplasmic
Q96N67	DOCK7	0.00798215	1.88012	DOCK7_HUMAN Dedicator of cytokinesis protein 7
P48729	CSNK1A1	0.0218862	1.87368	KC1A_HUMAN Casein kinase I isoform alpha
P0C7U0	ELFN1	0.0210392	1.87334	ELFN1_HUMAN Protein ELFN1
P41440	SLC19A1	0.00209701	1.87022	S19A1_HUMAN Folate transporter 1
P26927	MST1	0.0183362	1.86885	HGFL_HUMAN Hepatocyte growth factor-like protein
O43291	SPINT2	0.00164881	1.86747	SPIT2_HUMAN Kunitz-type protease inhibitor 2
Q69YN4	KIAA1429	0.0227683	1.86712	VIR_HUMAN Protein virilizer homolog
P05496	ATP5G1	0.00886421	1.86686	AT5G1_HUMAN ATP synthase F(0) complex subunit C1, mitochondrial
Q8NBJ4	GOLM1	0.0200997	1.86639	GOLM1_HUMAN Golgi membrane protein 1
Q9Y2G0	EFR3B	0.0227253	1.86562	EFR3B_HUMAN Protein EFR3 homolog B
P07951	TPM2	0.0204979	1.86292	TPM2_HUMAN Tropomyosin beta chain
Q92536	SLC7A6	0.0226647	1.86211	YLAT2_HUMAN Y+L amino acid transporter 2
Q96GE4	CEP95	0.0205433	1.86199	CEP95_HUMAN Centrosomal protein of 95 kDa
P29401	TKT	0.0227761	1.8605	TKT_HUMAN Transketolase
P42704	LRPPRC	0.00636341	1.85177	LPPRC_HUMAN Leucine-rich PPR motif-containing protein, mitochondrial
O43592	XPOT	0.0102148	1.85138	XPOT_HUMAN Exportin-T
P49184	DNASE1L1	0.0214739	1.84706	DNSL1_HUMAN Deoxyribonuclease-1-like 1
P61221	ABCE1	0.0164513	1.84688	ABCE1_HUMAN ATP-binding cassette sub-family E member 1
Q99758	ABCA3	0.0470262	1.84656	ABCA3_HUMAN ATP-binding cassette sub-family A member 3
Q13045	FLII	0.0136477	1.84565	FLII_HUMAN Protein flightless-1 homolog
Q7L1Q6	BZW1	0.0459558	1.84523	BZW1_HUMAN Basic leucine zipper and W2 domain-containing protein 1
P49368	CCT3	0.00890369	1.84512	TCPG_HUMAN T-complex protein 1 subunit gamma
Q8NE01	CNNM3	0.000682276	1.84476	CNNM3_HUMAN Metal transporter CNNM3
Q8TEX9	IPO4	0.00648709	1.84329	IPO4_HUMAN Importin-4
Q9H2U1	DHX36	0.0431937	1.84118	DHX36_HUMAN Probable ATP-dependent RNA helicase DHX36
O15162	PLSCR1	0.000415748	1.84104	PLS1_HUMAN Phospholipid scramblase 1
Q96FQ6	S100A16	0.0152588	1.83803	S10AG_HUMAN Protein S100-A16
Q68DH5	LMBRD2	0.00931472	1.83346	LMBD2_HUMAN LMBR1 domain-containing protein 2
P19367	HK1	0.0237339	1.83336	HXK1_HUMAN Hexokinase-1
O43752	STX6	0.0126724	1.83117	STX6_HUMAN Syntaxin-6
Q9H6A9	PCNXL3	8.93882e-05	1.83018	PCX3_HUMAN Pecanex-like protein 3
O60361	NME2P1	0.00417494	1.82889	NDK8_HUMAN Putative nucleoside diphosphate kinase
Q9Y2G3	ATP11B	0.0114433	1.82794	AT11B_HUMAN Probable phospholipid-transporting ATPase IF
Q9NW97	TMEM51	0.00760309	1.82793	TMM51_HUMAN Transmembrane protein 51
A4QPH2	PI4KAP2	0.0063577	1.82741	PI4P2_HUMAN Putative phosphatidylinositol 4-kinase alpha-like protein P2
P50897	PPT1	0.00292954	1.82402	PPT1_HUMAN Palmitoyl-protein thioesterase 1
Q5BKX6	SLC45A4	0.00123336	1.82389	S45A4_HUMAN Solute carrier family 45 member 4
Q9NVA4	TMEM184C	0.00441012	1.82335	T184C_HUMAN Transmembrane protein 184C
Q9H841	NIPAL2	0.00268856	1.8232	NPAL2_HUMAN NIPA-like protein 2
Q99500	S1PR3	0.0193081	1.823	S1PR3_HUMAN Sphingosine 1-phosphate receptor 3
P63010	AP2B1	0.00544753	1.8219	AP2B1_HUMAN AP-2 complex subunit beta
Q13459	MYO9B	0.00132452	1.81848	MYO9B_HUMAN Unconventional myosin-IXb
Q6ZUX7	LHFPL2	0.0106768	1.81823	LHPL2_HUMAN Lipoma HMGIC fusion partner-like 2 protein
Q9Y490	TLN1	0.00216775	1.81767	TLN1_HUMAN Talin-1
Q9NRW7	VPS45	0.0138561	1.81709	VPS45_HUMAN Vacuolar protein sorting-associated protein 45
O75122	CLASP2	0.00303697	1.81501	CLAP2_HUMAN CLIP-associating protein 2
P19438	TNFRSF1A	0.0203803	1.81453	TNR1A_HUMAN Tumor necrosis factor receptor superfamily member 1A
O95084	PRSS23	0.021149	1.81396	PRS23_HUMAN Serine protease 23
P18206	VCL	0.000415317	1.81345	VINC_HUMAN Vinculin
Q13131	PRKAA1	0.00270427	1.81273	AAPK1_HUMAN 5'-AMP-activated protein kinase catalytic subunit alpha-1
P02751	FN1	0.0223795	1.81266	FINC_HUMAN Fibronectin
Q8TAA9	VANGL1	0.00340267	1.80997	VANG1_HUMAN Vang-like protein 1
Q9NY64	SLC2A8	0.0131583	1.80776	GTR8_HUMAN Solute carrier family 2, facilitated glucose transporter member 8
P36021	SLC16A2	0.02146	1.80714	MOT8_HUMAN Monocarboxylate transporter 8
A6NKT7	RGPD3	0.0204418	1.80133	RGPD3_HUMAN RanBP2-like and GRIP domain-containing protein 3
Q96L92	SNX27	0.0224512	1.80116	SNX27_HUMAN Sorting nexin-27
O94955	RHOBTB3	0.0114009	1.80083	RHBT3_HUMAN Rho-related BTB domain-containing protein 3
Q9P265	DIP2B	0.00345772	1.79986	DIP2B_HUMAN Disco-interacting protein 2 homolog B
Q9HAV4	XPO5	0.00465961	1.79946	XPO5_HUMAN Exportin-5
Q9BSE2	TMEM79	0.00354266	1.79921	TMM79_HUMAN Transmembrane protein 79
Q96TA1	FAM129B	0.00621069	1.79663	NIBL1_HUMAN Niban-like protein 1
P40227	CCT6A	0.014611	1.79482	TCPZ_HUMAN T-complex protein 1 subunit zeta
P22061	PCMT1	0.0149813	1.79431	PIMT_HUMAN Protein-L-isoaspartate(D-aspartate) O-methyltransferase
Q9NRX5	SERINC1	0.00163456	1.79124	SERC1_HUMAN Serine incorporator 1
P56749	CLDN12	0.000246445	1.79047	CLD12_HUMAN Claudin-12
Q9NZH0	GPRC5B	0.0231771	1.79043	GPC5B_HUMAN G-protein coupled receptor family C group 5 member B
Q04656	ATP7A	0.0114839	1.78643	ATP7A_HUMAN Copper-transporting ATPase 1
J3KN10	PI4KA	0.0119429	1.78528	J3KN10_HUMAN Phosphatidylinositol 4-kinase alpha
E9PPU0	EPPK1	0.0303201	1.78474	E9PPU0_HUMAN Epiplakin
Q86TL2	TMEM110	0.00152363	1.7841	TM110_HUMAN Transmembrane protein 110
Q96SA4	SERINC2	0.0245793	1.78316	SERC2_HUMAN Serine incorporator 2
O75369	FLNB	0.0398685	1.78209	FLNB_HUMAN Filamin-B
P28340	POLD1	0.0241263	1.78197	DPOD1_HUMAN DNA polymerase delta catalytic subunit
O14662	STX16	0.0248079	1.7811	STX16_HUMAN Syntaxin-16
P56192	MARS	0.00342902	1.78058	SYMC_HUMAN Methionine--tRNA ligase, cytoplasmic
Q8TBP5	FAM174A	0.0372426	1.77831	F174A_HUMAN Membrane protein FAM174A
Q7Z478	DHX29	0.0433082	1.77712	DHX29_HUMAN ATP-dependent RNA helicase DHX29
Q9NQX5	NPDC1	0.00696322	1.77708	NPDC1_HUMAN Neural proliferation differentiation and control protein 1
Q86VI3	IQGAP3	0.0114586	1.77574	IQGA3_HUMAN Ras GTPase-activating-like protein IQGAP3
P23458	JAK1	0.0038161	1.77404	JAK1_HUMAN Tyrosine-protein kinase JAK1
P50851	LRBA	0.0107867	1.77265	LRBA_HUMAN Lipopolysaccharide-responsive and beige-like anchor protein
Q15743	GPR68	0.0204701	1.77217	OGR1_HUMAN Ovarian cancer G-protein coupled receptor 1
Q96Q45	TMEM237	0.00251959	1.77125	TM237_HUMAN Transmembrane protein 237
P98179	RBM3	0.0134453	1.77075	RBM3_HUMAN Putative RNA-binding protein 3
Q8NBS3	SLC4A11	0.00582707	1.77055	S4A11_HUMAN Sodium bicarbonate transporter-like protein 11
Q9BQT9	CLSTN3	0.00261788	1.76954	CSTN3_HUMAN Calsyntenin-3
Q96BD0	SLCO4A1	0.016052	1.76865	SO4A1_HUMAN Solute carrier organic anion transporter family member 4A1
Q9Y5U5	TNFRSF18	0.00279743	1.76837	TNR18_HUMAN Tumor necrosis factor receptor superfamily member 18
P50570	DNM2	0.0128136	1.76724	DYN2_HUMAN Dynamin-2
Q9Y3B7	MRPL11	0.0321211	1.76524	RM11_HUMAN 39S ribosomal protein L11, mitochondrial
O75746	SLC25A12	0.0131021	1.76115	CMC1_HUMAN Calcium-binding mitochondrial carrier protein Aralar1
P21283	ATP6V1C1	0.00951568	1.76089	VATC1_HUMAN V-type proton ATPase subunit C 1
Q8NBN3	TMEM87A	0.0163264	1.76043	TM87A_HUMAN Transmembrane protein 87A
P54851	EMP2	0.0133484	1.76024	EMP2_HUMAN Epithelial membrane protein 2
Q5VW36	FOCAD	0.00779974	1.75948	FOCAD_HUMAN Focadhesin
P53618	COPB1	0.00630536	1.75884	COPB_HUMAN Coatomer subunit beta
Q9H3Z4	DNAJC5	0.00127632	1.75846	DNJC5_HUMAN DnaJ homolog subfamily C member 5
Q8NFA0	USP32	0.0130284	1.75748	UBP32_HUMAN Ubiquitin carboxyl-terminal hydrolase 32
Q9BZR6	RTN4R	0.0298958	1.75658	RTN4R_HUMAN Reticulon-4 receptor
Q9HBH5	RDH14	0.0302329	1.75613	RDH14_HUMAN Retinol dehydrogenase 14
P62081	RPS7	0.00246224	1.75547	RS7_HUMAN 40S ribosomal protein S7
P16422	EPCAM	0.0195619	1.75481	EPCAM_HUMAN Epithelial cell adhesion molecule
O75131	CPNE3	0.04581	1.75437	CPNE3_HUMAN Copine-3
Q14527	HLTF	0.026809	1.75379	HLTF_HUMAN Helicase-like transcription factor
Q8NHS3	MFSD8	0.00208042	1.75062	MFSD8_HUMAN Major facilitator superfamily domain-containing protein 8
Q969K7	TMEM54	0.00317059	1.75014	TMM54_HUMAN Transmembrane protein 54
P07686	HEXB	0.0224843	1.75014	HEXB_HUMAN Beta-hexosaminidase subunit beta
Q9NQX4	MYO5C	0.00255853	1.74966	MYO5C_HUMAN Unconventional myosin-Vc
Q5T3U5	ABCC10	0.00665641	1.7495	MRP7_HUMAN Multidrug resistance-associated protein 7
P02753	RBP4	0.0191461	1.74912	RET4_HUMAN Retinol-binding protein 4
O43149	ZZEF1	0.0179197	1.7479	ZZEF1_HUMAN Zinc finger ZZ-type and EF-hand domain-containing protein 1
Q9ULH0	KIDINS220	0.0107934	1.74624	KDIS_HUMAN Kinase D-interacting substrate of 220 kDa
O95772	STARD3NL	0.00109179	1.74549	MENTO_HUMAN MLN64 N-terminal domain homolog
Q9H813	TMEM206	0.0012673	1.74435	TM206_HUMAN Transmembrane protein 206
Q14008	CKAP5	0.00122735	1.74244	CKAP5_HUMAN Cytoskeleton-associated protein 5
O00159	MYO1C	0.0181761	1.7396	MYO1C_HUMAN Unconventional myosin-Ic
P11142	HSPA8	0.0473718	1.7396	HSP7C_HUMAN Heat shock cognate 71 kDa protein
Q9Y5L0	TNPO3	0.000198701	1.73698	TNPO3_HUMAN Transportin-3
Q9BXS4	TMEM59	0.0399236	1.7366	TMM59_HUMAN Transmembrane protein 59
Q15345	LRRC41	0.0475401	1.73651	LRC41_HUMAN Leucine-rich repeat-containing protein 41
Q9GZZ1	NAA50	0.00148594	1.73634	NAA50_HUMAN N-alpha-acetyltransferase 50
P58107	EPPK1	0.0285371	1.73517	EPIPL_HUMAN Epiplakin
Q9UJS0	SLC25A13	0.0131432	1.73329	CMC2_HUMAN Calcium-binding mitochondrial carrier protein Aralar2
Q99832	CCT7	0.0263463	1.73218	TCPH_HUMAN T-complex protein 1 subunit eta
Q08357	SLC20A2	0.00425736	1.73087	S20A2_HUMAN Sodium-dependent phosphate transporter 2
Q9HCH5	SYTL2	0.036908	1.73085	SYTL2_HUMAN Synaptotagmin-like protein 2
P27708	CAD	0.00350655	1.73078	PYR1_HUMAN CAD protein
Q9H228	S1PR5	0.000704044	1.72932	S1PR5_HUMAN Sphingosine 1-phosphate receptor 5
Q96KP1	EXOC2	0.00224032	1.72403	EXOC2_HUMAN Exocyst complex component 2
Q969W9	PMEPA1	0.0151607	1.7215	PMEPA_HUMAN Transmembrane prostate androgen-induced protein
Q86VE9	SERINC5	0.0447837	1.72126	SERC5_HUMAN Serine incorporator 5
Q15833	STXBP2	0.0013358	1.7205	STXB2_HUMAN Syntaxin-binding protein 2
Q86VR2	FAM134C	0.0493833	1.72017	F134C_HUMAN Protein FAM134C
Q86VZ4	LRP11	0.00420504	1.71725	LRP11_HUMAN Low-density lipoprotein receptor-related protein 11
B7ZLX3	CLASP1	0.00694177	1.71377	B7ZLX3_HUMAN CLASP1 protein
P51512	MMP16	0.0121848	1.7137	MMP16_HUMAN Matrix metalloproteinase-16
O95782	AP2A1	0.0096117	1.71117	AP2A1_HUMAN AP-2 complex subunit alpha-1
Q13098	GPS1	0.0120954	1.70903	CSN1_HUMAN COP9 signalosome complex subunit 1
P17858	PFKL	0.0097708	1.70882	K6PL_HUMAN 6-phosphofructokinase, liver type
P58335	ANTXR2	0.0155941	1.70875	ANTR2_HUMAN Anthrax toxin receptor 2
Q8WWI5	SLC44A1	0.0122076	1.70838	CTL1_HUMAN Choline transporter-like protein 1
P05090	APOD	0.00399108	1.70725	APOD_HUMAN Apolipoprotein D
P49327	FASN	0.0109292	1.70664	FAS_HUMAN Fatty acid synthase
Q9NUM4	TMEM106B	0.000851962	1.70621	T106B_HUMAN Transmembrane protein 106B
Q7Z333	SETX	0.00322151	1.70603	SETX_HUMAN Probable helicase senataxin
Q9HAB3	SLC52A2	0.00287263	1.70513	S52A2_HUMAN Solute carrier family 52, riboflavin transporter, member 2
P84095	RHOG	0.00580069	1.7029	RHOG_HUMAN Rho-related GTP-binding protein RhoG
Q14139	UBE4A	0.00218514	1.70182	UBE4A_HUMAN Ubiquitin conjugation factor E4 A
P23469	PTPRE	0.00895344	1.69807	PTPRE_HUMAN Receptor-type tyrosine-protein phosphatase epsilon
Q9NQ84	GPRC5C	0.00407324	1.69657	GPC5C_HUMAN G-protein coupled receptor family C group 5 member C
Q9NS68	TNFRSF19	0.0297502	1.69489	TNR19_HUMAN Tumor necrosis factor receptor superfamily member 19
P36896	ACVR1B	0.00255458	1.69403	ACV1B_HUMAN Activin receptor type-1B
Q92911	SLC5A5	0.0289714	1.694	SC5A5_HUMAN Sodium/iodide cotransporter
Q9BV81	EMC6	0.00722986	1.69309	EMC6_HUMAN ER membrane protein complex subunit 6
P40199	CEACAM6	0.00374093	1.69287	CEAM6_HUMAN Carcinoembryonic antigen-related cell adhesion molecule 6
Q9Y5Y5	PEX16	0.0293853	1.69092	PEX16_HUMAN Peroxisomal membrane protein PEX16
Q92747	ARPC1A	0.00327378	1.69085	ARC1A_HUMAN Actin-related protein 2/3 complex subunit 1A
O60716	CTNND1	0.00342981	1.68949	CTND1_HUMAN Catenin delta-1
P00374	DHFR	0.00938772	1.68809	DYR_HUMAN Dihydrofolate reductase
P11586	MTHFD1	0.00584804	1.68798	C1TC_HUMAN C-1-tetrahydrofolate synthase, cytoplasmic
Q9NV96	TMEM30A	0.00559925	1.6866	CC50A_HUMAN Cell cycle control protein 50A
Q8NFJ5	GPRC5A	0.0191047	1.68404	RAI3_HUMAN Retinoic acid-induced protein 3
P34897	SHMT2	0.0134546	1.68368	GLYM_HUMAN Serine hydroxymethyltransferase, mitochondrial
Q9BXS9	SLC26A6	0.00195335	1.68333	S26A6_HUMAN Solute carrier family 26 member 6
Q8N8H1	ZNF321P	0.00282377	1.68332	ZN321_HUMAN Putative protein ZNF321
Q86TG1	TMEM150A	0.048559	1.68216	T150A_HUMAN Transmembrane protein 150A
Q9Y5E6	PCDHB3	0.0228923	1.67903	PCDB3_HUMAN Protocadherin beta-3
Q13423	NNT	0.0265204	1.67817	NNTM_HUMAN NAD(P) transhydrogenase, mitochondrial
P55010	EIF5	0.034865	1.67785	IF5_HUMAN Eukaryotic translation initiation factor 5
A0AVT1	UBA6	0.0125713	1.67775	UBA6_HUMAN Ubiquitin-like modifier-activating enzyme 6
P10253	GAA	0.00334834	1.67742	LYAG_HUMAN Lysosomal alpha-glucosidase
P30989	NTSR1	0.0181819	1.67719	NTR1_HUMAN Neurotensin receptor type 1
Q00610	CLTC	0.0119771	1.67599	CLH1_HUMAN Clathrin heavy chain 1
Q16563	SYPL1	0.0413238	1.67276	SYPL1_HUMAN Synaptophysin-like protein 1
Q8IV08	PLD3	0.00693075	1.67272	PLD3_HUMAN Phospholipase D3
Q9H8J5	MANSC1	0.00287124	1.67269	MANS1_HUMAN MANSC domain-containing protein 1
Q27J81	INF2	8.00405e-05	1.66978	INF2_HUMAN Inverted formin-2
Q9UN72	PCDHA7	0.00877769	1.66861	PCDA7_HUMAN Protocadherin alpha-7
P62736	ACTA2	0.0404129	1.66837	ACTA_HUMAN Actin, aortic smooth muscle
O95214	LEPROTL1	0.0176543	1.66801	LERL1_HUMAN Leptin receptor overlapping transcript-like 1
P63165	SUMO1	0.0265736	1.66789	SUMO1_HUMAN Small ubiquitin-related modifier 1
O75146	HIP1R	0.000319941	1.66772	HIP1R_HUMAN Huntingtin-interacting protein 1-related protein
Q9UI26	IPO11	0.0297619	1.66495	IPO11_HUMAN Importin-11
Q587I9	SFT2D3	0.0227672	1.66488	SFT2C_HUMAN Vesicle transport protein SFT2C
Q04609	FOLH1	0.00882572	1.66461	FOLH1_HUMAN Glutamate carboxypeptidase 2
Q86VP6	CAND1	0.00488529	1.66237	CAND1_HUMAN Cullin-associated NEDD8-dissociated protein 1
Q9Y4R8	TELO2	0.0176938	1.66202	TELO2_HUMAN Telomere length regulation protein TEL2 homolog
P27361	MAPK3	0.0154657	1.66015	MK03_HUMAN Mitogen-activated protein kinase 3
Q9BS40	LXN	0.00142466	1.65972	LXN_HUMAN Latexin
O14929	HAT1	0.0499379	1.65865	HAT1_HUMAN Histone acetyltransferase type B catalytic subunit
Q99784	OLFM1	0.00964095	1.65655	NOE1_HUMAN Noelin
Q14435	GALNT3	0.0005626	1.65585	GALT3_HUMAN Polypeptide N-acetylgalactosaminyltransferase 3
O00115	DNASE2	0.0285555	1.65529	DNS2A_HUMAN Deoxyribonuclease-2-alpha
O75387	SLC43A1	0.00190458	1.65361	LAT3_HUMAN Large neutral amino acids transporter small subunit 3
D6RAX3	PCDH1	0.0141146	1.65206	D6RAX3_HUMAN Protocadherin-1
Q13617	CUL2	0.0117687	1.64883	CUL2_HUMAN Cullin-2
Q99829	CPNE1	0.0271469	1.64865	CPNE1_HUMAN Copine-1
Q86SQ4	GPR126	0.049916	1.64748	GP126_HUMAN G-protein coupled receptor 126
P55854	SUMO3	0.0290971	1.64532	SUMO3_HUMAN Small ubiquitin-related modifier 3
P49281	SLC11A2	0.000312342	1.6448	NRAM2_HUMAN Natural resistance-associated macrophage protein 2
O43813	LANCL1	0.000612788	1.64316	LANC1_HUMAN LanC-like protein 1
Q86UP2	KTN1	0.0245205	1.64294	KTN1_HUMAN Kinectin
Q9Y6K5	OAS3	0.00556032	1.64233	OAS3_HUMAN 2'-5'-oligoadenylate synthase 3
Q6R327	RICTOR	0.0112912	1.64115	RICTR_HUMAN Rapamycin-insensitive companion of mTOR
P43250	GRK6	0.00654049	1.64076	GRK6_HUMAN G protein-coupled receptor kinase 6
O15431	SLC31A1	0.00295685	1.64038	COPT1_HUMAN High affinity copper uptake protein 1
A5YKK6	CNOT1	0.00752662	1.64014	CNOT1_HUMAN CCR4-NOT transcription complex subunit 1
P08247	SYP	0.010325	1.64013	SYPH_HUMAN Synaptophysin
P37235	HPCAL1	0.00878436	1.63865	HPCL1_HUMAN Hippocalcin-like protein 1
Q92692	PVRL2	0.0158391	1.63689	PVRL2_HUMAN Poliovirus receptor-related protein 2
O60749	SNX2	0.0345001	1.63547	SNX2_HUMAN Sorting nexin-2
P62937	PPIA	0.0115491	1.63534	PPIA_HUMAN Peptidyl-prolyl cis-trans isomerase A
Q8N697	SLC15A4	0.0192035	1.63436	S15A4_HUMAN Solute carrier family 15 member 4
Q6YHK3	CD109	0.0358905	1.63427	CD109_HUMAN CD109 antigen
Q8IVY1	C1orf210	0.0251432	1.63392	CA210_HUMAN Putative uncharacterized protein C1orf210
Q8WTW3	COG1	0.0153373	1.63025	COG1_HUMAN Conserved oligomeric Golgi complex subunit 1
Q9P289	MST4	0.0138845	1.62982	MST4_HUMAN Serine/threonine-protein kinase MST4
P07858	CTSB	0.0496684	1.62948	CATB_HUMAN Cathepsin B
P60953	CDC42	0.00173852	1.62716	CDC42_HUMAN Cell division control protein 42 homolog
Q9UG63	ABCF2	0.0139066	1.62679	ABCF2_HUMAN ATP-binding cassette sub-family F member 2
Q9UPY3	DICER1	0.0209976	1.62631	DICER_HUMAN Endoribonuclease Dicer
Q96P70	IPO9	0.00882084	1.62598	IPO9_HUMAN Importin-9
Q6NW40	RGMB	0.00989965	1.62596	RGMB_HUMAN RGM domain family member B
Q9H267	VPS33B	0.0298676	1.62561	VP33B_HUMAN Vacuolar protein sorting-associated protein 33B
P04156	PRNP	0.0389915	1.62558	PRIO_HUMAN Major prion protein
Q5R3F8	ELFN2	0.0147683	1.62525	PPR29_HUMAN Protein phosphatase 1 regulatory subunit 29
Q5T0W9	FAM83B	0.0379193	1.62465	FA83B_HUMAN Protein FAM83B
Q86SF2	GALNT7	0.0354372	1.62393	GALT7_HUMAN N-acetylgalactosaminyltransferase 7
Q9UGH3	SLC23A2	0.00342468	1.62351	S23A2_HUMAN Solute carrier family 23 member 2
Q9Y5L3	ENTPD2	0.0231318	1.62299	ENTP2_HUMAN Ectonucleoside triphosphate diphosphohydrolase 2
P21333	FLNA	0.0262144	1.62159	FLNA_HUMAN Filamin-A
Q9P2J5	LARS	0.00379927	1.62046	SYLC_HUMAN Leucine--tRNA ligase, cytoplasmic
Q13620	CUL4B	0.0477265	1.62041	CUL4B_HUMAN Cullin-4B
Q2MV58	TCTN1	0.00235581	1.61907	TECT1_HUMAN Tectonic-1
P15170	GSPT1	0.00668729	1.61596	ERF3A_HUMAN Eukaryotic peptide chain release factor GTP-binding subunit ERF3A
Q7Z7N9	TMEM179B	0.00342137	1.61563	T179B_HUMAN Transmembrane protein 179B
O75533	SF3B1	0.0414419	1.61476	SF3B1_HUMAN Splicing factor 3B subunit 1
Q9BZM5	ULBP2	0.00690796	1.61295	N2DL2_HUMAN NKG2D ligand 2
Q9Y624	F11R	0.00720029	1.61037	JAM1_HUMAN Junctional adhesion molecule A
Q9BPX3	NCAPG	0.0157936	1.61005	CND3_HUMAN Condensin complex subunit 3
P20340	RAB6A	0.0362802	1.60869	RAB6A_HUMAN Ras-related protein Rab-6A
O15354	GPR37	0.0249023	1.60795	GPR37_HUMAN Prosaposin receptor GPR37
Q96PL5	ERMAP	0.000915482	1.60772	ERMAP_HUMAN Erythroid membrane-associated protein
Q9BV20	MRI1	0.022683	1.60582	MTNA_HUMAN Methylthioribose-1-phosphate isomerase
Q9UKS6	PACSIN3	0.0145388	1.60533	PACN3_HUMAN Protein kinase C and casein kinase substrate in neurons protein 3
Q8IY17	PNPLA6	0.0154106	1.60302	PLPL6_HUMAN Neuropathy target esterase
O15231	ZNF185	0.0409355	1.6028	ZN185_HUMAN Zinc finger protein 185
Q9UDW1	UQCR10	0.0200286	1.60196	QCR9_HUMAN Cytochrome b-c1 complex subunit 9
P04004	VTN	0.024833	1.60167	VTNC_HUMAN Vitronectin
A5A3E0	POTEF	0.0378975	1.60136	POTEF_HUMAN POTE ankyrin domain family member F
Q96QU8	XPO6	0.0384796	1.59972	XPO6_HUMAN Exportin-6
P50748	KNTC1	0.0192859	1.59961	KNTC1_HUMAN Kinetochore-associated protein 1
O95159	ZFPL1	0.0151415	1.599	ZFPL1_HUMAN Zinc finger protein-like 1
G3V3K0	RDH11	0.00644807	1.59864	G3V3K0_HUMAN Retinol dehydrogenase 11
O60503	ADCY9	0.00544352	1.59814	ADCY9_HUMAN Adenylate cyclase type 9
Q13530	SERINC3	0.000519194	1.59787	SERC3_HUMAN Serine incorporator 3
Q15375	EPHA7	0.00230553	1.59757	EPHA7_HUMAN Ephrin type-A receptor 7
Q9BQ52	ELAC2	0.014394	1.59631	RNZ2_HUMAN Zinc phosphodiesterase ELAC protein 2
Q99624	SLC38A3	0.0354789	1.59628	S38A3_HUMAN Sodium-coupled neutral amino acid transporter 3
P20073	ANXA7	0.0128908	1.59498	ANXA7_HUMAN Annexin A7
O95136	S1PR2	0.0037074	1.59345	S1PR2_HUMAN Sphingosine 1-phosphate receptor 2
P09619	PDGFRB	0.0130227	1.59324	PGFRB_HUMAN Platelet-derived growth factor receptor beta
Q5VZK9	LRRC16A	0.00978859	1.59295	LR16A_HUMAN Leucine-rich repeat-containing protein 16A
P28482	MAPK1	0.0369029	1.59148	MK01_HUMAN Mitogen-activated protein kinase 1
Q9C0D5	TANC1	0.0197706	1.59067	TANC1_HUMAN Protein TANC1
Q6P158	DHX57	0.0091304	1.59019	DHX57_HUMAN Putative ATP-dependent RNA helicase DHX57
Q15257	PPP2R4	0.0257276	1.58982	PTPA_HUMAN Serine/threonine-protein phosphatase 2A activator
Q9ULK4	MED23	0.0188339	1.58925	MED23_HUMAN Mediator of RNA polymerase II transcription subunit 23
O43264	ZW10	0.0303424	1.5887	ZW10_HUMAN Centromere/kinetochore protein zw10 homolog
P35346	SSTR5	0.0317592	1.58861	SSR5_HUMAN Somatostatin receptor type 5
Q24JP5	TMEM132A	0.0377885	1.58856	T132A_HUMAN Transmembrane protein 132A
Q86X10	RALGAPB	0.00197633	1.58652	RLGPB_HUMAN Ral GTPase-activating protein subunit beta
E7EPH4	DDR1	0.0128021	1.58649	E7EPH4_HUMAN Epithelial discoidin domain-containing receptor 1 (Fragment)
P04062	GBA	0.00313899	1.58634	GLCM_HUMAN Glucosylceramidase
P04066	FUCA1	0.0213236	1.58615	FUCO_HUMAN Tissue alpha-L-fucosidase
Q96C24	SYTL4	0.0304362	1.58583	SYTL4_HUMAN Synaptotagmin-like protein 4
P53621	COPA	0.00565223	1.5855	COPA_HUMAN Coatomer subunit alpha
Q9NP58	ABCB6	0.0205911	1.58503	ABCB6_HUMAN ATP-binding cassette sub-family B member 6, mitochondrial
Q7KZI7	MARK2	0.0456604	1.58501	MARK2_HUMAN Serine/threonine-protein kinase MARK2
Q8WUM4	PDCD6IP	0.0308056	1.5841	PDC6I_HUMAN Programmed cell death 6-interacting protein
P49189	ALDH9A1	0.0412135	1.58397	AL9A1_HUMAN 4-trimethylaminobutyraldehyde dehydrogenase
Q92538	GBF1	0.00674637	1.58191	GBF1_HUMAN Golgi-specific brefeldin A-resistance guanine nucleotide exchange factor 1
Q93009	USP7	0.0436466	1.58179	UBP7_HUMAN Ubiquitin carboxyl-terminal hydrolase 7
Q9H3K6	BOLA2	0.00253863	1.58021	BOLA2_HUMAN BolA-like protein 2
Q9H2K8	TAOK3	0.00626686	1.57741	TAOK3_HUMAN Serine/threonine-protein kinase TAO3
P35579	MYH9	0.0269774	1.57622	MYH9_HUMAN Myosin-9
P23284	PPIB	0.0033391	1.57469	PPIB_HUMAN Peptidyl-prolyl cis-trans isomerase B
P23921	RRM1	0.0164915	1.57353	RIR1_HUMAN Ribonucleoside-diphosphate reductase large subunit
O95180	CACNA1H	0.0108415	1.57327	CAC1H_HUMAN Voltage-dependent T-type calcium channel subunit alpha-1H
Q12767	KIAA0195	0.00216287	1.56995	K0195_HUMAN Uncharacterized protein KIAA0195
Q9HCJ1	ANKH	0.00560415	1.56987	ANKH_HUMAN Progressive ankylosis protein homolog
Q8N0U8	VKORC1L1	0.0156646	1.56977	VKORL_HUMAN Vitamin K epoxide reductase complex subunit 1-like protein 1
Q6NVV3	NIPAL1	0.0131444	1.56727	NIPA3_HUMAN Magnesium transporter NIPA3
P01011	SERPINA3	0.0219999	1.56713	AACT_HUMAN Alpha-1-antichymotrypsin
P02649	APOE	0.0165406	1.5664	APOE_HUMAN Apolipoprotein E
O00507	USP9Y	0.0215174	1.56555	USP9Y_HUMAN Probable ubiquitin carboxyl-terminal hydrolase FAF-Y
O94829	IPO13	0.00852707	1.5644	IPO13_HUMAN Importin-13
Q92621	NUP205	0.0154415	1.56178	NU205_HUMAN Nuclear pore complex protein Nup205
Q01968	OCRL	0.0387498	1.56079	OCRL_HUMAN Inositol polyphosphate 5-phosphatase OCRL-1
Q8NHP8	PLBD2	0.00776193	1.55984	PLBL2_HUMAN Putative phospholipase B-like 2
Q12999	TSPAN31	0.0026457	1.55917	TSN31_HUMAN Tetraspanin-31
Q12768	KIAA0196	0.00446344	1.55862	STRUM_HUMAN WASH complex subunit strumpellin
P11117	ACP2	0.0150571	1.55767	PPAL_HUMAN Lysosomal acid phosphatase
Q96NT5	SLC46A1	0.00755284	1.5562	PCFT_HUMAN Proton-coupled folate transporter
Q07864	POLE	0.0254109	1.55523	DPOE1_HUMAN DNA polymerase epsilon catalytic subunit A
Q96HV5	TMEM41A	0.0409732	1.55404	TM41A_HUMAN Transmembrane protein 41A
P53396	ACLY	0.0197501	1.55378	ACLY_HUMAN ATP-citrate synthase
Q9HB90	RRAGC	0.0165208	1.55341	RRAGC_HUMAN Ras-related GTP-binding protein C
P48067	SLC6A9	0.0136795	1.55299	SC6A9_HUMAN Sodium- and chloride-dependent glycine transporter 1
A6NL28	0	0.0106152	1.5516	TPM3L_HUMAN Putative tropomyosin alpha-3 chain-like protein
P01137	TGFB1	0.0139219	1.54846	TGFB1_HUMAN Transforming growth factor beta-1
Q9NV70	EXOC1	0.0344405	1.54843	EXOC1_HUMAN Exocyst complex component 1
Q96EC8	YIPF6	0.00509906	1.54838	YIPF6_HUMAN Protein YIPF6
Q2M389	KIAA1033	0.0012919	1.54724	WASH7_HUMAN WASH complex subunit 7
Q9H7D0	DOCK5	0.0137442	1.54585	DOCK5_HUMAN Dedicator of cytokinesis protein 5
Q15843	NEDD8	0.00869841	1.54557	NEDD8_HUMAN NEDD8
Q5VW38	GPR107	0.00934824	1.54536	GP107_HUMAN Protein GPR107
Q96F07	CYFIP2	0.000987507	1.54505	CYFP2_HUMAN Cytoplasmic FMR1-interacting protein 2
Q9NPL8	TIMMDC1	0.0294388	1.54405	TIDC1_HUMAN Complex I assembly factor TIMMDC1, mitochondrial
O14976	GAK	0.00893367	1.54403	GAK_HUMAN Cyclin-G-associated kinase
P54136	RARS	0.0237509	1.54359	SYRC_HUMAN Arginine--tRNA ligase, cytoplasmic
Q15758	SLC1A5	0.0257834	1.54306	AAAT_HUMAN Neutral amino acid transporter B(0)
P57735	RAB25	0.00639131	1.54215	RAB25_HUMAN Ras-related protein Rab-25
O00754	MAN2B1	0.00170683	1.54206	MA2B1_HUMAN Lysosomal alpha-mannosidase
P51798	CLCN7	0.000566474	1.54198	CLCN7_HUMAN H(+)/Cl(-) exchange transporter 7
Q13085	ACACA	0.00960815	1.54098	ACACA_HUMAN Acetyl-CoA carboxylase 1
P63279	UBE2I	0.0364561	1.5399	UBC9_HUMAN SUMO-conjugating enzyme UBC9
Q6P1M3	LLGL2	0.0118916	1.53878	L2GL2_HUMAN Lethal(2) giant larvae protein homolog 2
Q9H158	PCDHAC1	0.0121826	1.53784	PCDC1_HUMAN Protocadherin alpha-C1
Q96T76	MMS19	0.00889406	1.53681	MMS19_HUMAN MMS19 nucleotide excision repair protein homolog
Q8WUM9	SLC20A1	0.0390652	1.53652	S20A1_HUMAN Sodium-dependent phosphate transporter 1
Q14542	SLC29A2	0.0216725	1.53574	S29A2_HUMAN Equilibrative nucleoside transporter 2
O94822	LTN1	0.00956996	1.53486	LTN1_HUMAN E3 ubiquitin-protein ligase listerin
Q9BTW9	TBCD	0.0106267	1.53406	TBCD_HUMAN Tubulin-specific chaperone D
O60637	TSPAN3	0.00308724	1.53401	TSN3_HUMAN Tetraspanin-3
P09543	CNP	0.00936569	1.53398	CN37_HUMAN 2',3'-cyclic-nucleotide 3'-phosphodiesterase
P48029	SLC6A8	0.00317212	1.53397	SC6A8_HUMAN Sodium- and chloride-dependent creatine transporter 1
F2Z333	C1orf233	0.0258458	1.53293	CA233_HUMAN Fibronectin type-III domain-containing transmembrane protein C1orf233
P22314	UBA1	0.0189618	1.53247	UBA1_HUMAN Ubiquitin-like modifier-activating enzyme 1
P26358	DNMT1	0.0476365	1.53235	DNMT1_HUMAN DNA (cytosine-5)-methyltransferase 1
Q93074	MED12	0.00714381	1.53175	MED12_HUMAN Mediator of RNA polymerase II transcription subunit 12
E7ERA6	RNF223	0.0010709	1.53158	RN223_HUMAN RING finger protein 223
Q92615	LARP4B	0.00213565	1.5315	LAR4B_HUMAN La-related protein 4B
Q9UGQ3	SLC2A6	0.00305978	1.53019	GTR6_HUMAN Solute carrier family 2, facilitated glucose transporter member 6
O94832	MYO1D	0.00492742	1.53008	MYO1D_HUMAN Unconventional myosin-Id
P47897	QARS	0.0177783	1.52956	SYQ_HUMAN Glutamine--tRNA ligase
P52565	ARHGDIA	0.0340573	1.52921	GDIR1_HUMAN Rho GDP-dissociation inhibitor 1
Q96NY8	PVRL4	0.00767591	1.52884	PVRL4_HUMAN Poliovirus receptor-related protein 4
P09467	FBP1	0.00810214	1.52881	F16P1_HUMAN Fructose-1,6-bisphosphatase 1
Q14697	GANAB	0.0330689	1.52869	GANAB_HUMAN Neutral alpha-glucosidase AB
P52298	NCBP2	0.0372357	1.52802	NCBP2_HUMAN Nuclear cap-binding protein subunit 2
Q9ULV1	FZD4	0.00361293	1.52594	FZD4_HUMAN Frizzled-4
Q16186	ADRM1	0.0308809	1.52577	ADRM1_HUMAN Proteasomal ubiquitin receptor ADRM1
P05161	ISG15	0.0199063	1.52244	ISG15_HUMAN Ubiquitin-like protein ISG15
P06744	GPI	0.00976068	1.52066	G6PI_HUMAN Glucose-6-phosphate isomerase
O43795	MYO1B	0.0177039	1.51786	MYO1B_HUMAN Unconventional myosin-Ib
P27037	ACVR2A	0.00476102	1.51767	AVR2A_HUMAN Activin receptor type-2A
B3KQV7	SLC29A1	0.00233851	1.51436	B3KQV7_HUMAN Equilibrative nucleoside transporter 1
O15440	ABCC5	0.0121015	1.51433	MRP5_HUMAN Multidrug resistance-associated protein 5
Q9ULV0	MYO5B	0.0103074	1.51406	MYO5B_HUMAN Unconventional myosin-Vb
P23443	RPS6KB1	0.0169617	1.5119	KS6B1_HUMAN Ribosomal protein S6 kinase beta-1
Q9NUQ9	FAM49B	0.0145001	1.51031	FA49B_HUMAN Protein FAM49B
P01891	HLA-A	0.0224688	1.5102	1A68_HUMAN HLA class I histocompatibility antigen, A-68 alpha chain
Q9NS93	TM7SF3	0.00259514	1.50967	TM7S3_HUMAN Transmembrane 7 superfamily member 3
Q969T9	WBP2	0.0125725	1.50865	WBP2_HUMAN WW domain-binding protein 2
Q13510	ASAH1	0.0240475	1.50773	ASAH1_HUMAN Acid ceramidase
Q6P9B6	TLDC1	0.0345358	1.5075	TLDC1_HUMAN TLD domain-containing protein 1
O00161	SNAP23	0.00850746	1.50685	SNP23_HUMAN Synaptosomal-associated protein 23
Q86V21	AACS	0.0266318	1.50646	AACS_HUMAN Acetoacetyl-CoA synthetase
Q6UXD5	SEZ6L2	0.00224207	1.50643	SE6L2_HUMAN Seizure 6-like protein 2
P78371	CCT2	0.00861232	1.50631	TCPB_HUMAN T-complex protein 1 subunit beta
P04049	RAF1	0.0426717	1.50605	RAF1_HUMAN RAF proto-oncogene serine/threonine-protein kinase
P99999	CYCS	0.0469073	1.50499	CYC_HUMAN Cytochrome c
Q9UM54	MYO6	0.0164131	1.50473	MYO6_HUMAN Unconventional myosin-VI
Q14247	CTTN	0.0468943	1.50449	SRC8_HUMAN Src substrate cortactin
Q15768	EFNB3	0.037779	1.50347	EFNB3_HUMAN Ephrin-B3
Q9H6S3	EPS8L2	0.0185328	1.50282	ES8L2_HUMAN Epidermal growth factor receptor kinase substrate 8-like protein 2
O60256	PRPSAP2	0.00201419	1.50251	KPRB_HUMAN Phosphoribosyl pyrophosphate synthase-associated protein 2
Q8N1B4	VPS52	0.0247583	1.50183	VPS52_HUMAN Vacuolar protein sorting-associated protein 52 homolog
Q9HCM4	EPB41L5	0.0109559	1.50069	E41L5_HUMAN Band 4.1-like protein 5
O15439	ABCC4	0.0102492	1.49971	MRP4_HUMAN Multidrug resistance-associated protein 4
Q8WXG6	MADD	0.0173532	1.49798	MADD_HUMAN MAP kinase-activating death domain protein
Q9HC58	SLC24A3	0.00287501	1.49611	NCKX3_HUMAN Sodium/potassium/calcium exchanger 3
Q9Y5Y0	FLVCR1	0.00569102	1.49595	FLVC1_HUMAN Feline leukemia virus subgroup C receptor-related protein 1
Q96QE2	SLC2A13	0.00110872	1.49564	MYCT_HUMAN Proton myo-inositol cotransporter
Q9NRG7	SDR39U1	0.0259125	1.49548	D39U1_HUMAN Isoform 2 of Epimerase family protein SDR39U1
Q15751	HERC1	0.0366834	1.49468	HERC1_HUMAN Probable E3 ubiquitin-protein ligase HERC1
Q9NQ36	SCUBE2	0.00410261	1.49306	SCUB2_HUMAN Signal peptide, CUB and EGF-like domain-containing protein 2
Q14728	MFSD10	0.0177117	1.49209	MFS10_HUMAN Major facilitator superfamily domain-containing protein 10
Q6YHU6	THADA	0.00709006	1.49088	THADA_HUMAN Thyroid adenoma-associated protein
Q8NCC5	SLC37A3	0.0101737	1.48979	SPX3_HUMAN Sugar phosphate exchanger 3
Q01650	SLC7A5	0.0376071	1.48892	LAT1_HUMAN Large neutral amino acids transporter small subunit 1
Q9NZT2	OGFR	0.0175578	1.48823	OGFR_HUMAN Opioid growth factor receptor
Q9BW60	ELOVL1	0.0129849	1.48568	ELOV1_HUMAN Elongation of very long chain fatty acids protein 1
Q9UPT5	EXOC7	0.0152732	1.48549	EXOC7_HUMAN Exocyst complex component 7
O75592	MYCBP2	0.0172393	1.48513	MYCB2_HUMAN Probable E3 ubiquitin-protein ligase MYCBP2
O43157	PLXNB1	0.0100099	1.48391	PLXB1_HUMAN Plexin-B1
Q93008	USP9X	0.00114604	1.48361	USP9X_HUMAN Probable ubiquitin carboxyl-terminal hydrolase FAF-X
P98155	VLDLR	0.0243366	1.48334	VLDLR_HUMAN Very low-density lipoprotein receptor
Q8NCW0	KREMEN2	0.0118029	1.48324	KREM2_HUMAN Kremen protein 2
A6NEC2	NPEPPSL1	0.00632412	1.48295	PSAL_HUMAN Puromycin-sensitive aminopeptidase-like protein
P23381	WARS	0.0188982	1.48282	SYWC_HUMAN Tryptophan--tRNA ligase, cytoplasmic
Q8NFZ4	NLGN2	0.00120712	1.48205	NLGN2_HUMAN Neuroligin-2
Q8TF66	LRRC15	0.0374524	1.48136	LRC15_HUMAN Leucine-rich repeat-containing protein 15
O43760	SYNGR2	0.0298408	1.48103	SNG2_HUMAN Synaptogyrin-2
P55082	MFAP3	0.000249965	1.48093	MFAP3_HUMAN Microfibril-associated glycoprotein 3
Q8WUG5	SLC22A17	0.00876173	1.4795	S22AH_HUMAN Solute carrier family 22 member 17
Q9NPR9	GPR108	0.0392347	1.4784	GP108_HUMAN Protein GPR108
Q9HA64	FN3KRP	0.0314572	1.47835	KT3K_HUMAN Ketosamine-3-kinase
P21579	SYT1	0.00901094	1.47579	SYT1_HUMAN Synaptotagmin-1
P55786	NPEPPS	0.0042158	1.47556	PSA_HUMAN Puromycin-sensitive aminopeptidase
P43487	RANBP1	0.0191571	1.4749	RANG_HUMAN Ran-specific GTPase-activating protein
P49915	GMPS	0.0116719	1.47432	GUAA_HUMAN GMP synthase [glutamine-hydrolyzing]
Q07866	KLC1	0.0386812	1.47393	KLC1_HUMAN Kinesin light chain 1
P42330	AKR1C3	0.0113292	1.4736	AK1C3_HUMAN Aldo-keto reductase family 1 member C3
O00170	AIP	0.00364259	1.4731	AIP_HUMAN AH receptor-interacting protein
P36894	BMPR1A	0.00119437	1.47307	BMR1A_HUMAN Bone morphogenetic protein receptor type-1A
Q9BW92	TARS2	0.0494652	1.47278	SYTM_HUMAN Threonine--tRNA ligase, mitochondrial
O60645	EXOC3	0.0160011	1.47229	EXOC3_HUMAN Exocyst complex component 3
Q9Y3A5	SBDS	0.0246037	1.47202	SBDS_HUMAN Ribosome maturation protein SBDS
Q08431	MFGE8	0.0296784	1.47122	MFGM_HUMAN Lactadherin
P68036	UBE2L3	0.0185772	1.46857	UB2L3_HUMAN Ubiquitin-conjugating enzyme E2 L3
Q9NYG2	ZDHHC3	0.0116713	1.46838	ZDHC3_HUMAN Palmitoyltransferase ZDHHC3
P30043	BLVRB	0.00577684	1.4677	BLVRB_HUMAN Flavin reductase (NADPH)
Q6ZMB5	TMEM184A	0.0229224	1.46741	T184A_HUMAN Transmembrane protein 184A
Q5VYK3	ECM29	0.0119875	1.4668	ECM29_HUMAN Proteasome-associated protein ECM29 homolog
P49641	MAN2A2	0.019777	1.46625	MA2A2_HUMAN Alpha-mannosidase 2x
Q9Y2B0	CNPY2	0.0311946	1.46549	CNPY2_HUMAN Protein canopy homolog 2
A8K8P3	SFI1	0.0326265	1.46445	SFI1_HUMAN Protein SFI1 homolog
P61353	RPL27	0.002014	1.46442	RL27_HUMAN 60S ribosomal protein L27
Q86WA9	SLC26A11	0.00747928	1.46283	S2611_HUMAN Sodium-independent sulfate anion transporter
Q9BYK8	HELZ2	0.0117268	1.46276	HELZ2_HUMAN Helicase with zinc finger domain 2
O15118	NPC1	0.000494755	1.46274	NPC1_HUMAN Niemann-Pick C1 protein
Q92626	PXDN	0.00748101	1.46222	PXDN_HUMAN Peroxidasin homolog
Q86WK7	AMIGO3	0.00725788	1.46042	AMGO3_HUMAN Amphoterin-induced protein 3
Q9Y3E0	GOLT1B	0.000324257	1.45911	GOT1B_HUMAN Vesicle transport protein GOT1B
Q9ULA0	DNPEP	0.0263579	1.45843	DNPEP_HUMAN Aspartyl aminopeptidase
P04899	GNAI2	0.0244997	1.45789	GNAI2_HUMAN Guanine nucleotide-binding protein G(i) subunit alpha-2
Q8IY26	PPAPDC2	0.0475094	1.45764	PPAC2_HUMAN Presqualene diphosphate phosphatase
P35125	USP6	0.0107347	1.45729	UBP6_HUMAN Ubiquitin carboxyl-terminal hydrolase 6
Q2LD37	KIAA1109	0.00589671	1.45727	K1109_HUMAN Uncharacterized protein KIAA1109
P06737	PYGL	0.0109842	1.45704	PYGL_HUMAN Glycogen phosphorylase, liver form
Q6ZUK4	TMEM26	0.0215125	1.45602	TMM26_HUMAN Transmembrane protein 26
O15258	RER1	0.0256147	1.45571	RER1_HUMAN Protein RER1
Q6AI08	HEATR6	0.00473816	1.45562	HEAT6_HUMAN HEAT repeat-containing protein 6
Q16836	HADH	0.00171285	1.45562	HCDH_HUMAN Hydroxyacyl-coenzyme A dehydrogenase, mitochondrial
Q9HD42	CHMP1A	0.0295372	1.45512	CHM1A_HUMAN Charged multivesicular body protein 1a
Q15021	NCAPD2	0.0132431	1.45389	CND1_HUMAN Condensin complex subunit 1
Q7Z4F1	LRP10	0.00422435	1.45389	LRP10_HUMAN Low-density lipoprotein receptor-related protein 10
P09669	COX6C	0.0442864	1.45305	COX6C_HUMAN Cytochrome c oxidase subunit 6C
O43830	ZNF73	0.0269867	1.45292	ZNF73_HUMAN Zinc finger protein 73
Q99805	TM9SF2	0.0117704	1.45281	TM9S2_HUMAN Transmembrane 9 superfamily member 2
P21399	ACO1	0.0460469	1.45267	ACOC_HUMAN Cytoplasmic aconitate hydratase
Q02750	MAP2K1	0.00100462	1.45181	MP2K1_HUMAN Dual specificity mitogen-activated protein kinase kinase 1
Q14997	PSME4	0.00641195	1.45039	PSME4_HUMAN Proteasome activator complex subunit 4
Q2M3R5	SLC35G1	0.00241936	1.4503	S35G1_HUMAN Solute carrier family 35 member G1
Q9HCE1	MOV10	0.0156819	1.44896	MOV10_HUMAN Putative helicase MOV-10
Q92887	ABCC2	0.0231521	1.44828	MRP2_HUMAN Canalicular multispecific organic anion transporter 1
Q12959	DLG1	0.0141169	1.448	DLG1_HUMAN Disks large homolog 1
P29372	MPG	0.0245578	1.4476	3MG_HUMAN DNA-3-methyladenine glycosylase
O76082	SLC22A5	0.0124833	1.44739	S22A5_HUMAN Solute carrier family 22 member 5
Q9NXF1	TEX10	0.0479778	1.44716	TEX10_HUMAN Testis-expressed sequence 10 protein
P31146	CORO1A	0.0232279	1.44687	COR1A_HUMAN Coronin-1A
Q8TE59	ADAMTS19	0.0435672	1.44583	ATS19_HUMAN A disintegrin and metalloproteinase with thrombospondin motifs 19
P31946	YWHAB	0.039112	1.44581	1433B_HUMAN 14-3-3 protein beta/alpha
Q15654	TRIP6	0.00086824	1.4453	TRIP6_HUMAN Thyroid receptor-interacting protein 6
Q9UPU5	USP24	0.035298	1.44397	UBP24_HUMAN Ubiquitin carboxyl-terminal hydrolase 24
I3L0P4	CLUH	0.0255482	1.44297	I3L0P4_HUMAN Clustered mitochondria protein homolog (Fragment)
Q9H6Y7	RNF167	0.0187793	1.44239	RN167_HUMAN E3 ubiquitin-protein ligase RNF167
P35520	CBS	0.0241318	1.44148	CBS_HUMAN Cystathionine beta-synthase
P29992	GNA11	0.0143113	1.4405	GNA11_HUMAN Guanine nucleotide-binding protein subunit alpha-11
Q9Y485	DMXL1	0.00967921	1.44042	DMXL1_HUMAN DmX-like protein 1
Q5T3F8	TMEM63B	0.0385922	1.43951	TM63B_HUMAN Transmembrane protein 63B
P49840	GSK3A	0.0196029	1.43907	GSK3A_HUMAN Glycogen synthase kinase-3 alpha
P08237	PFKM	0.024498	1.43892	K6PF_HUMAN 6-phosphofructokinase, muscle type
O43866	CD5L	0.0223198	1.43844	CD5L_HUMAN CD5 antigen-like
P01023	A2M	0.0104689	1.4383	A2MG_HUMAN Alpha-2-macroglobulin
Q9UBT2	UBA2	0.00598577	1.4379	SAE2_HUMAN SUMO-activating enzyme subunit 2
Q9BXW9	FANCD2	0.0132886	1.43784	FACD2_HUMAN Fanconi anemia group D2 protein
Q5VIR6	VPS53	0.0194814	1.4367	VPS53_HUMAN Vacuolar protein sorting-associated protein 53 homolog
Q8NDA8	MROH1	0.0153791	1.43652	MROH1_HUMAN Maestro heat-like repeat-containing protein family member 1
Q7Z402	TMC7	0.000234455	1.43582	TMC7_HUMAN Transmembrane channel-like protein 7
O43934	MFSD11	0.0129664	1.4355	MFS11_HUMAN UNC93-like protein MFSD11
Q13404	UBE2V1	0.0304565	1.43341	UB2V1_HUMAN Ubiquitin-conjugating enzyme E2 variant 1
Q9UNS1	TIMELESS	0.0193968	1.43322	TIM_HUMAN Protein timeless homolog
P19784	CSNK2A2	0.04345	1.43191	CSK22_HUMAN Casein kinase II subunit alpha'
Q9NP81	SARS2	0.00255006	1.43048	SYSM_HUMAN Serine--tRNA ligase, mitochondrial
P34810	CD68	0.0128573	1.42959	CD68_HUMAN Macrosialin
Q5TF39	NAGLT1	0.038926	1.42847	NAGT1_HUMAN Sodium-dependent glucose transporter 1
P42695	NCAPD3	0.0202549	1.42809	CNDD3_HUMAN Condensin-2 complex subunit D3
Q9NQR4	NIT2	0.00358327	1.42686	NIT2_HUMAN Omega-amidase NIT2
Q9NVI1	FANCI	0.0118949	1.4265	FANCI_HUMAN Fanconi anemia group I protein
Q8N3C0	ASCC3	0.019736	1.42647	ASCC3_HUMAN Activating signal cointegrator 1 complex subunit 3
Q96F05	C11orf24	0.0389224	1.42616	CK024_HUMAN Uncharacterized protein C11orf24
P47756	CAPZB	0.00515715	1.42544	CAPZB_HUMAN F-actin-capping protein subunit beta
P78362	SRPK2	0.0200018	1.42544	SRPK2_HUMAN SRSF protein kinase 2
Q9P2C4	TMEM181	0.00908762	1.42412	TM181_HUMAN Transmembrane protein 181
Q9BQ70	TCF25	0.0296722	1.42209	TCF25_HUMAN Transcription factor 25
P30559	OXTR	0.0214664	1.42117	OXYR_HUMAN Oxytocin receptor
P15586	GNS	0.000476563	1.4209	GNS_HUMAN N-acetylglucosamine-6-sulfatase
Q9Y5G3	PCDHGB1	0.0423975	1.42041	PCDGD_HUMAN Protocadherin gamma-B1
Q8IZJ1	UNC5B	0.0419575	1.41991	UNC5B_HUMAN Netrin receptor UNC5B
Q9Y4I1	MYO5A	0.00113136	1.41916	MYO5A_HUMAN Unconventional myosin-Va
Q92581	SLC9A6	0.0129321	1.41667	SL9A6_HUMAN Sodium/hydrogen exchanger 6
Q10589	BST2	0.00589807	1.41521	BST2_HUMAN Bone marrow stromal antigen 2
Q9NUU6	FAM105A	0.00337272	1.41486	F105A_HUMAN Inactive ubiquitin thioesterase FAM105A
Q8NC42	RNF149	0.0171941	1.41443	RN149_HUMAN E3 ubiquitin-protein ligase RNF149
P17516	AKR1C4	0.041027	1.41443	AK1C4_HUMAN Aldo-keto reductase family 1 member C4
A0PJW6	TMEM223	0.00531361	1.41428	TM223_HUMAN Transmembrane protein 223
Q9UKM7	MAN1B1	0.0097165	1.4137	MA1B1_HUMAN Endoplasmic reticulum mannosyl-oligosaccharide 1,2-alpha-mannosidase
P13639	EEF2	0.0237684	1.41151	EF2_HUMAN Elongation factor 2
O43306	ADCY6	0.0101452	1.41136	ADCY6_HUMAN Adenylate cyclase type 6
Q96Q15	SMG1	0.0222208	1.41095	SMG1_HUMAN Serine/threonine-protein kinase SMG1
Q15392	DHCR24	0.0265045	1.4104	DHC24_HUMAN Delta(24)-sterol reductase
P56134	ATP5J2	0.0304004	1.41016	ATPK_HUMAN ATP synthase subunit f, mitochondrial
Q7Z698	SPRED2	0.00674016	1.40956	SPRE2_HUMAN Sprouty-related, EVH1 domain-containing protein 2
O43567	RNF13	0.0181518	1.40916	RNF13_HUMAN E3 ubiquitin-protein ligase RNF13
Q8NBI2	CYB561A3	0.013621	1.40643	CYAC3_HUMAN Cytochrome b ascorbate-dependent protein 3
O14910	LIN7A	0.011648	1.40567	LIN7A_HUMAN Protein lin-7 homolog A
Q7Z434	MAVS	0.035118	1.40489	MAVS_HUMAN Mitochondrial antiviral-signaling protein
Q9ULZ9	MMP17	0.0131638	1.40488	MMP17_HUMAN Matrix metalloproteinase-17
Q16401	PSMD5	0.041592	1.40242	PSMD5_HUMAN 26S proteasome non-ATPase regulatory subunit 5
Q01518	CAP1	0.0169461	1.40189	CAP1_HUMAN Adenylyl cyclase-associated protein 1
Q3MIR4	TMEM30B	0.00548113	1.39971	CC50B_HUMAN Cell cycle control protein 50B
Q9BV10	ALG12	0.00840504	1.39704	ALG12_HUMAN Dol-P-Man:Man(7)GlcNAc(2)-PP-Dol alpha-1,6-mannosyltransferase
O94808	GFPT2	0.0185584	1.39672	GFPT2_HUMAN Glutamine--fructose-6-phosphate aminotransferase [isomerizing] 2
Q9P0T7	TMEM9	0.0146487	1.39659	TMEM9_HUMAN Transmembrane protein 9
Q9UIA9	XPO7	0.0216152	1.39645	XPO7_HUMAN Exportin-7
Q9Y487	ATP6V0A2	0.0126829	1.39557	VPP2_HUMAN V-type proton ATPase 116 kDa subunit a isoform 2
Q14C86	GAPVD1	0.0384132	1.39454	GAPD1_HUMAN GTPase-activating protein and VPS9 domain-containing protein 1
Q9H015	SLC22A4	0.00113734	1.3935	S22A4_HUMAN Solute carrier family 22 member 4
O00462	MANBA	0.0193384	1.39319	MANBA_HUMAN Beta-mannosidase
Q9UHQ4	BCAP29	0.00879589	1.39261	BAP29_HUMAN B-cell receptor-associated protein 29
Q9Y3R5	DOPEY2	0.00454663	1.39135	DOP2_HUMAN Protein dopey-2
Q9Y6D5	ARFGEF2	0.0311473	1.3907	BIG2_HUMAN Brefeldin A-inhibited guanine nucleotide-exchange protein 2
P53004	BLVRA	0.00164486	1.38941	BIEA_HUMAN Biliverdin reductase A
O15438	ABCC3	0.0157054	1.38902	MRP3_HUMAN Canalicular multispecific organic anion transporter 2
O43657	TSPAN6	0.0334742	1.38845	TSN6_HUMAN Tetraspanin-6
Q9NS86	LANCL2	0.0258786	1.38771	LANC2_HUMAN LanC-like protein 2
P51665	PSMD7	0.0409855	1.38771	PSMD7_HUMAN 26S proteasome non-ATPase regulatory subunit 7
Q86XA9	HEATR5A	0.0306203	1.38731	HTR5A_HUMAN HEAT repeat-containing protein 5A
Q969E2	SCAMP4	0.000278663	1.38673	SCAM4_HUMAN Secretory carrier-associated membrane protein 4
Q9BXC0	HCAR1	3.91589e-05	1.3862	HCAR1_HUMAN Hydroxycarboxylic acid receptor 1
Q5T1S8	NCMAP	0.0340314	1.38579	NCMAP_HUMAN Noncompact myelin-associated protein
P55085	F2RL1	0.0463308	1.38499	PAR2_HUMAN Proteinase-activated receptor 2
O75121	MFAP3L	0.0031614	1.38409	MFA3L_HUMAN Microfibrillar-associated protein 3-like
Q9Y6K0	CEPT1	0.0417417	1.38408	CEPT1_HUMAN Choline/ethanolaminephosphotransferase 1
Q9Y6N5	SQRDL	0.0149121	1.38403	SQRD_HUMAN Sulfide:quinone oxidoreductase, mitochondrial
Q9UMN6	KMT2B	0.0448188	1.38374	KMT2B_HUMAN Histone-lysine N-methyltransferase 2B
Q9BZ29	DOCK9	0.0137727	1.38369	DOCK9_HUMAN Dedicator of cytokinesis protein 9
Q9BTY2	FUCA2	0.0129942	1.38291	FUCO2_HUMAN Plasma alpha-L-fucosidase
A6NDJ8	0	0.047265	1.381	RB43L_HUMAN Putative Rab-43-like protein ENSP00000330714
Q9BQB6	VKORC1	0.0263348	1.37837	VKOR1_HUMAN Vitamin K epoxide reductase complex subunit 1
P23193	TCEA1	0.0376877	1.37729	TCEA1_HUMAN Transcription elongation factor A protein 1
P42345	MTOR	0.0222326	1.37645	MTOR_HUMAN Serine/threonine-protein kinase mTOR
Q08AM6	VAC14	0.0060188	1.37458	VAC14_HUMAN Protein VAC14 homolog
Q92820	GGH	0.00875951	1.37428	GGH_HUMAN Gamma-glutamyl hydrolase
Q86UK0	ABCA12	0.00213035	1.37399	ABCAC_HUMAN ATP-binding cassette sub-family A member 12
O60568	PLOD3	0.0206467	1.37393	PLOD3_HUMAN Procollagen-lysine,2-oxoglutarate 5-dioxygenase 3
Q29RF7	PDS5A	0.0272979	1.37326	PDS5A_HUMAN Sister chromatid cohesion protein PDS5 homolog A
O14617	AP3D1	0.00461041	1.37175	AP3D1_HUMAN AP-3 complex subunit delta-1
Q6IA17	SIGIRR	0.041319	1.37121	SIGIR_HUMAN Single Ig IL-1-related receptor
Q9Y5G2	PCDHGB2	0.0285693	1.37115	PCDGE_HUMAN Protocadherin gamma-B2
Q6P9B9	INTS5	0.020369	1.37033	INT5_HUMAN Integrator complex subunit 5
Q9Y3P9	RABGAP1	0.0154935	1.36993	RBGP1_HUMAN Rab GTPase-activating protein 1
Q9P1W3	TMEM63C	0.0116509	1.36883	TM63C_HUMAN Transmembrane protein 63C
P00918	CA2	0.0168159	1.36715	CAH2_HUMAN Carbonic anhydrase 2
Q7Z6Z7	HUWE1	0.0444693	1.36466	HUWE1_HUMAN E3 ubiquitin-protein ligase HUWE1
O95622	ADCY5	0.0273156	1.3646	ADCY5_HUMAN Adenylate cyclase type 5
Q13177	PAK2	0.0154593	1.36458	PAK2_HUMAN Serine/threonine-protein kinase PAK 2
Q8TCT7	SPPL2B	0.00279332	1.36447	SPP2B_HUMAN Signal peptide peptidase-like 2B
O60779	SLC19A2	0.013666	1.36237	S19A2_HUMAN Thiamine transporter 1
Q6NUK4	REEP3	0.0420794	1.36115	REEP3_HUMAN Receptor expression-enhancing protein 3
P43004	SLC1A2	0.0236783	1.36076	EAA2_HUMAN Excitatory amino acid transporter 2
Q9H2H9	SLC38A1	0.0113131	1.35981	S38A1_HUMAN Sodium-coupled neutral amino acid transporter 1
Q9BZD2	SLC29A3	0.0271738	1.35955	S29A3_HUMAN Equilibrative nucleoside transporter 3
P37173	TGFBR2	0.00243008	1.35936	TGFR2_HUMAN TGF-beta receptor type-2
Q9GZU1	MCOLN1	0.0330195	1.35868	MCLN1_HUMAN Mucolipin-1
O95870	ABHD16A	0.0201744	1.35771	ABHGA_HUMAN Abhydrolase domain-containing protein 16A
P51828	ADCY7	0.0410752	1.35678	ADCY7_HUMAN Adenylate cyclase type 7
Q32M45	ANO4	0.0198934	1.35625	ANO4_HUMAN Anoctamin-4
P61081	UBE2M	0.0453806	1.35585	UBC12_HUMAN NEDD8-conjugating enzyme Ubc12
Q8N8J7	C4orf32	0.0262325	1.35583	CD032_HUMAN Uncharacterized protein C4orf32
P14735	IDE	0.0310613	1.35441	IDE_HUMAN Insulin-degrading enzyme
P28799	GRN	0.00866483	1.35431	GRN_HUMAN Granulins
P32241	VIPR1	0.0366168	1.35183	VIPR1_HUMAN Vasoactive intestinal polypeptide receptor 1
Q9Y6M7	SLC4A7	0.00429161	1.35109	S4A7_HUMAN Sodium bicarbonate cotransporter 3
Q5XXA6	ANO1	0.00336093	1.35103	ANO1_HUMAN Anoctamin-1
Q96ET8	TVP23C	0.0397741	1.35066	TV23C_HUMAN Golgi apparatus membrane protein TVP23 homolog C
Q8N6M3	FITM2	0.0404324	1.34651	FITM2_HUMAN Fat storage-inducing transmembrane protein 2
A1A5B4	ANO9	0.0244602	1.34476	ANO9_HUMAN Anoctamin-9
Q01813	PFKP	0.0142099	1.34229	K6PP_HUMAN 6-phosphofructokinase type C
Q9HB09	BCL2L12	0.00981499	1.34107	B2L12_HUMAN Bcl-2-like protein 12
Q9H3U1	UNC45A	0.00793579	1.34062	UN45A_HUMAN Protein unc-45 homolog A
O43747	AP1G1	0.0220877	1.34062	AP1G1_HUMAN AP-1 complex subunit gamma-1
Q6ZNA5	FRRS1	0.00257425	1.33972	FRRS1_HUMAN Ferric-chelate reductase 1
Q9P2D3	HEATR5B	0.0168128	1.33956	HTR5B_HUMAN HEAT repeat-containing protein 5B
P52569	SLC7A2	0.0218691	1.33907	CTR2_HUMAN Low affinity cationic amino acid transporter 2
Q9Y6A1	POMT1	0.0381259	1.3384	POMT1_HUMAN Protein O-mannosyl-transferase 1
P50443	SLC26A2	0.00743481	1.33765	S26A2_HUMAN Sulfate transporter
P42858	HTT	0.00552841	1.33707	HD_HUMAN Huntingtin
Q92878	RAD50	0.0187988	1.33614	RAD50_HUMAN DNA repair protein RAD50
Q7Z3U7	MON2	0.0203695	1.33546	MON2_HUMAN Protein MON2 homolog
Q68DK2	ZFYVE26	0.0350679	1.33536	ZFY26_HUMAN Zinc finger FYVE domain-containing protein 26
Q13488	TCIRG1	0.0257947	1.33459	VPP3_HUMAN V-type proton ATPase 116 kDa subunit a isoform 3
O75165	DNAJC13	0.0197793	1.3344	DJC13_HUMAN DnaJ homolog subfamily C member 13
Q5VU97	CACHD1	0.0207162	1.33407	CAHD1_HUMAN VWFA and cache domain-containing protein 1
P11362	FGFR1	0.00554217	1.33375	FGFR1_HUMAN Fibroblast growth factor receptor 1
P78382	SLC35A1	0.0147792	1.33298	S35A1_HUMAN CMP-sialic acid transporter
Q9NZ53	PODXL2	0.000460755	1.33157	PDXL2_HUMAN Podocalyxin-like protein 2
Q8NHX9	TPCN2	0.0156257	1.33145	TPC2_HUMAN Two pore calcium channel protein 2
O43242	PSMD3	0.0106082	1.33098	PSMD3_HUMAN 26S proteasome non-ATPase regulatory subunit 3
P12235	SLC25A4	0.048207	1.33017	ADT1_HUMAN ADP/ATP translocase 1
P56817	BACE1	0.00812232	1.32877	BACE1_HUMAN Beta-secretase 1
Q8TB61	SLC35B2	0.0222188	1.32803	S35B2_HUMAN Adenosine 3'-phospho 5'-phosphosulfate transporter 1
Q9UGM3	DMBT1	0.000450132	1.32696	DMBT1_HUMAN Deleted in malignant brain tumors 1 protein
Q6NSJ5	LRRC8E	0.0142364	1.32547	LRC8E_HUMAN Leucine-rich repeat-containing protein 8E
Q6ZNC8	MBOAT1	0.0392094	1.32517	MBOA1_HUMAN Lysophospholipid acyltransferase 1
P21583	KITLG	0.00481005	1.32502	SCF_HUMAN Kit ligand
Q9H1C7	CYSTM1	0.0136483	1.32337	CYTM1_HUMAN Cysteine-rich and transmembrane domain-containing protein 1
Q9H5Y7	SLITRK6	0.00638646	1.32233	SLIK6_HUMAN SLIT and NTRK-like protein 6
P29317	EPHA2	0.0324534	1.31967	EPHA2_HUMAN Ephrin type-A receptor 2
Q16762	TST	0.0105507	1.31938	THTR_HUMAN Thiosulfate sulfurtransferase
P48730	CSNK1D	0.0368799	1.31876	KC1D_HUMAN Casein kinase I isoform delta
P00338	LDHA	0.00283015	1.31615	LDHA_HUMAN L-lactate dehydrogenase A chain
Q8N2K0	ABHD12	0.0303788	1.31609	ABD12_HUMAN Monoacylglycerol lipase ABHD12
Q7Z403	TMC6	0.00406762	1.31591	TMC6_HUMAN Transmembrane channel-like protein 6
O15126	SCAMP1	0.00937972	1.31287	SCAM1_HUMAN Secretory carrier-associated membrane protein 1
Q8N370	SLC43A2	0.0185264	1.31277	LAT4_HUMAN Large neutral amino acids transporter small subunit 4
Q9ULQ1	TPCN1	0.000654908	1.31179	TPC1_HUMAN Two pore calcium channel protein 1
P10155	TROVE2	0.0412449	1.30936	RO60_HUMAN 60 kDa SS-A/Ro ribonucleoprotein
P15309	ACPP	0.0185952	1.30765	PPAP_HUMAN Prostatic acid phosphatase
O15327	INPP4B	0.0366581	1.30745	INP4B_HUMAN Type II inositol 3,4-bisphosphate 4-phosphatase
P22455	FGFR4	0.0279924	1.30729	FGFR4_HUMAN Fibroblast growth factor receptor 4
O43776	NARS	0.0228591	1.30674	SYNC_HUMAN Asparagine--tRNA ligase, cytoplasmic
Q9H553	ALG2	0.00253454	1.30671	ALG2_HUMAN Alpha-1,3/1,6-mannosyltransferase ALG2
P59998	ARPC4	0.00432165	1.30629	ARPC4_HUMAN Actin-related protein 2/3 complex subunit 4
Q8IXZ2	ZC3H3	0.0142223	1.30426	ZC3H3_HUMAN Zinc finger CCCH domain-containing protein 3
Q9BUF7	CRB3	0.0354895	1.30399	CRUM3_HUMAN Protein crumbs homolog 3
P10586	PTPRF	0.0183396	1.30289	PTPRF_HUMAN Receptor-type tyrosine-protein phosphatase F
Q6ZNJ1	NBEAL2	0.0286022	1.3023	NBEL2_HUMAN Neurobeachin-like protein 2
O14684	PTGES	0.0347192	1.30196	PTGES_HUMAN Prostaglandin E synthase
P55083	MFAP4	0.00473773	1.30154	MFAP4_HUMAN Microfibril-associated glycoprotein 4
Q9Y2Q3	GSTK1	0.0146511	1.30101	GSTK1_HUMAN Glutathione S-transferase kappa 1
P54753	EPHB3	0.00845435	1.29897	EPHB3_HUMAN Ephrin type-B receptor 3
C9JFX4	SIGIRR	0.0285279	1.29825	C9JFX4_HUMAN Single Ig IL-1-related receptor
P31153	MAT2A	0.00338088	1.29798	METK2_HUMAN S-adenosylmethionine synthase isoform type-2
Q9UJ14	GGT7	0.0214595	1.29753	GGT7_HUMAN Gamma-glutamyltransferase 7
O15554	KCNN4	0.00599101	1.29496	KCNN4_HUMAN Intermediate conductance calcium-activated potassium channel protein 4
P17812	CTPS1	0.000692963	1.29455	PYRG1_HUMAN CTP synthase 1
P49588	AARS	0.0473805	1.29204	SYAC_HUMAN Alanine--tRNA ligase, cytoplasmic
P61158	ACTR3	0.0418668	1.29204	ARP3_HUMAN Actin-related protein 3
Q96RD7	PANX1	0.0275969	1.29179	PANX1_HUMAN Pannexin-1
P57057	SLC37A1	0.00617419	1.291	GLPT_HUMAN Glycerol-3-phosphate transporter
Q8IXI1	RHOT2	0.0236086	1.29056	MIRO2_HUMAN Mitochondrial Rho GTPase 2
P43007	SLC1A4	0.0211558	1.29037	SATT_HUMAN Neutral amino acid transporter A
Q9NZV1	CRIM1	0.0320812	1.29032	CRIM1_HUMAN Cysteine-rich motor neuron 1 protein
Q5SRE5	NUP188	0.0309072	1.29025	NU188_HUMAN Nucleoporin NUP188 homolog
P41240	CSK	0.0483459	1.28965	CSK_HUMAN Tyrosine-protein kinase CSK
Q12789	GTF3C1	0.0463554	1.28922	TF3C1_HUMAN General transcription factor 3C polypeptide 1
Q16706	MAN2A1	0.0421774	1.28814	MA2A1_HUMAN Alpha-mannosidase 2
O60831	PRAF2	0.024359	1.2876	PRAF2_HUMAN PRA1 family protein 2
P04920	SLC4A2	0.00427238	1.28753	B3A2_HUMAN Anion exchange protein 2
O60931	CTNS	0.00977687	1.28693	CTNS_HUMAN Cystinosin
Q8WWB7	C1orf85	0.0223707	1.28665	NCUG1_HUMAN Lysosomal protein NCU-G1
Q13873	BMPR2	0.00717596	1.28598	BMPR2_HUMAN Bone morphogenetic protein receptor type-2
Q9NTI5	PDS5B	0.00796343	1.28592	PDS5B_HUMAN Sister chromatid cohesion protein PDS5 homolog B
O95196	CSPG5	0.0183472	1.2858	CSPG5_HUMAN Chondroitin sulfate proteoglycan 5
Q8N539	FIBCD1	0.0314623	1.28523	FBCD1_HUMAN Fibrinogen C domain-containing protein 1
Q86XS8	RNF130	0.0239602	1.28502	GOLI_HUMAN E3 ubiquitin-protein ligase RNF130
Q5FWE3	PRRT3	0.0430546	1.28475	PRRT3_HUMAN Proline-rich transmembrane protein 3
Q2PZI1	DPY19L1	0.0122577	1.2834	D19L1_HUMAN Probable C-mannosyltransferase DPY19L1
Q5BJD5	TMEM41B	0.00686262	1.28196	TM41B_HUMAN Transmembrane protein 41B
Q7L2E3	DHX30	0.0139149	1.28021	DHX30_HUMAN Putative ATP-dependent RNA helicase DHX30
Q6ZN44	UNC5A	0.0423194	1.28011	UNC5A_HUMAN Netrin receptor UNC5A
Q30201	HFE	0.0320782	1.27893	HFE_HUMAN Hereditary hemochromatosis protein
Q92616	GCN1L1	0.0222638	1.27847	GCN1L_HUMAN Translational activator GCN1
H0YC40	CD47	0.0334595	1.27824	H0YC40_HUMAN Leukocyte surface antigen CD47 (Fragment)
Q8TD20	SLC2A12	0.015803	1.27631	GTR12_HUMAN Solute carrier family 2, facilitated glucose transporter member 12
P15291	B4GALT1	0.0196426	1.27593	B4GT1_HUMAN Beta-1,4-galactosyltransferase 1
Q9H0V1	TMEM168	0.00230356	1.2756	TM168_HUMAN Transmembrane protein 168
P03905	MT-ND4	0.0344302	1.27503	NU4M_HUMAN NADH-ubiquinone oxidoreductase chain 4
Q9H0C3	TMEM117	0.026587	1.27302	TM117_HUMAN Transmembrane protein 117
P06400	RB1	0.0191117	1.2715	RB_HUMAN Retinoblastoma-associated protein
P41231	P2RY2	0.02986	1.271	P2RY2_HUMAN P2Y purinoceptor 2
Q5TH69	ARFGEF3	0.00631146	1.2687	BIG3_HUMAN Brefeldin A-inhibited guanine nucleotide-exchange protein 3
Q9NY35	CLDND1	0.0160432	1.26856	CLDN1_HUMAN Claudin domain-containing protein 1
Q9UPY5	SLC7A11	0.0451825	1.26809	XCT_HUMAN Cystine/glutamate transporter
Q15760	GPR19	0.0491711	1.26746	GPR19_HUMAN Probable G-protein coupled receptor 19
Q9NP72	RAB18	0.0286022	1.26729	RAB18_HUMAN Ras-related protein Rab-18
O15270	SPTLC2	0.0217025	1.26724	SPTC2_HUMAN Serine palmitoyltransferase 2
Q9NZR2	LRP1B	0.0328337	1.26468	LRP1B_HUMAN Low-density lipoprotein receptor-related protein 1B
Q86W33	TPRA1	0.0383107	1.26324	TPRA1_HUMAN Transmembrane protein adipocyte-associated 1
Q6UW56	ATRAID	0.000343946	1.26305	ARAID_HUMAN All-trans retinoic acid-induced differentiation factor
O95857	TSPAN13	0.0351423	1.26252	TSN13_HUMAN Tetraspanin-13
Q9NUN5	LMBRD1	0.021425	1.26181	LMBD1_HUMAN Probable lysosomal cobalamin transporter
P34896	SHMT1	0.00643976	1.26016	GLYC_HUMAN Serine hydroxymethyltransferase, cytosolic
P14618	PKM	0.00215209	1.25815	KPYM_HUMAN Pyruvate kinase PKM
A8MVW0	FAM171A2	0.0436345	1.25793	F1712_HUMAN Protein FAM171A2
P40925	MDH1	0.0442354	1.2563	MDHC_HUMAN Malate dehydrogenase, cytoplasmic
P01903	HLA-DRA	0.00662659	1.25581	DRA_HUMAN HLA class II histocompatibility antigen, DR alpha chain
O75342	ALOX12B	0.012625	1.25567	LX12B_HUMAN Arachidonate 12-lipoxygenase, 12R-type
P11766	ADH5	0.0426471	1.25457	ADHX_HUMAN Alcohol dehydrogenase class-3
Q96QT4	TRPM7	0.0316024	1.25449	TRPM7_HUMAN Transient receptor potential cation channel subfamily M member 7
Q08722	CD47	0.0145298	1.25347	CD47_HUMAN Leukocyte surface antigen CD47
O94901	SUN1	0.0192553	1.25236	SUN1_HUMAN SUN domain-containing protein 1
P15260	IFNGR1	0.0276204	1.25206	INGR1_HUMAN Interferon gamma receptor 1
O43396	TXNL1	0.0446931	1.25202	TXNL1_HUMAN Thioredoxin-like protein 1
P68371	TUBB4B	0.0124245	1.25146	TBB4B_HUMAN Tubulin beta-4B chain
Q03518	TAP1	0.0339258	1.24961	TAP1_HUMAN Antigen peptide transporter 1
Q4KMQ2	ANO6	0.0286906	1.2495	ANO6_HUMAN Anoctamin-6
A4D1G6	CALCR	0.0129414	1.24593	A4D1G6_HUMAN Calcitonin receptor
Q9UNQ0	ABCG2	0.0114514	1.24526	ABCG2_HUMAN ATP-binding cassette sub-family G member 2
Q14114	LRP8	0.01911	1.24437	LRP8_HUMAN Low-density lipoprotein receptor-related protein 8
O60603	TLR2	0.0138832	1.24413	TLR2_HUMAN Toll-like receptor 2
Q96A29	SLC35C1	0.0386839	1.24402	FUCT1_HUMAN GDP-fucose transporter 1
Q13535	ATR	0.0424346	1.24144	ATR_HUMAN Serine/threonine-protein kinase ATR
Q8NBW4	SLC38A9	0.012182	1.241	S38A9_HUMAN Putative sodium-coupled neutral amino acid transporter 9
Q6U841	SLC4A10	0.0129655	1.23841	S4A10_HUMAN Sodium-driven chloride bicarbonate exchanger
P78527	PRKDC	0.0115032	1.23672	PRKDC_HUMAN DNA-dependent protein kinase catalytic subunit
Q9UHW9	SLC12A6	0.00113786	1.2366	S12A6_HUMAN Solute carrier family 12 member 6
P07437	TUBB	0.0392157	1.23655	TBB5_HUMAN Tubulin beta chain
Q53GQ0	HSD17B12	0.00923124	1.23618	DHB12_HUMAN Estradiol 17-beta-dehydrogenase 12
Q9BX79	STRA6	0.0105621	1.23609	STRA6_HUMAN Stimulated by retinoic acid gene 6 protein homolog
Q08380	LGALS3BP	0.0281533	1.23604	LG3BP_HUMAN Galectin-3-binding protein
P36888	FLT3	0.0152058	1.23476	FLT3_HUMAN Receptor-type tyrosine-protein kinase FLT3
P61073	CXCR4	0.0257466	1.23427	CXCR4_HUMAN C-X-C chemokine receptor type 4
Q99571	P2RX4	0.048952	1.23384	P2RX4_HUMAN P2X purinoceptor 4
P48735	IDH2	0.0384849	1.23292	IDHP_HUMAN Isocitrate dehydrogenase [NADP], mitochondrial
Q96JA1	LRIG1	0.0246564	1.23138	LRIG1_HUMAN Leucine-rich repeats and immunoglobulin-like domains protein 1
Q86YN1	DOLPP1	0.00458205	1.22943	DOPP1_HUMAN Dolichyldiphosphatase 1
P68363	TUBA1B	0.0415729	1.22914	TBA1B_HUMAN Tubulin alpha-1B chain
Q86WC4	OSTM1	0.0394475	1.22854	OSTM1_HUMAN Osteopetrosis-associated transmembrane protein 1
Q92959	SLCO2A1	0.0378756	1.22806	SO2A1_HUMAN Solute carrier organic anion transporter family member 2A1
P61619	SEC61A1	0.0134729	1.22548	S61A1_HUMAN Protein transport protein Sec61 subunit alpha isoform 1
Q8WVH0	CPLX3	0.0128558	1.22462	CPLX3_HUMAN Complexin-3
P17050	NAGA	0.0311817	1.22288	NAGAB_HUMAN Alpha-N-acetylgalactosaminidase
Q9H2X9	SLC12A5	0.0131999	1.22278	S12A5_HUMAN Solute carrier family 12 member 5
Q9Y570	PPME1	0.0204334	1.22114	PPME1_HUMAN Protein phosphatase methylesterase 1
P25445	FAS	0.0404855	1.22013	TNR6_HUMAN Tumor necrosis factor receptor superfamily member 6
A0AV02	SLC12A8	0.0110294	1.22009	S12A8_HUMAN Solute carrier family 12 member 8
P49902	NT5C2	0.0246105	1.22008	5NTC_HUMAN Cytosolic purine 5'-nucleotidase
Q6ZRP7	QSOX2	0.0449842	1.2199	QSOX2_HUMAN Sulfhydryl oxidase 2
Q9HBW0	LPAR2	0.0211734	1.21875	LPAR2_HUMAN Lysophosphatidic acid receptor 2
O00445	SYT5	0.0222823	1.21868	SYT5_HUMAN Synaptotagmin-5
O75144	ICOSLG	0.000440058	1.21796	ICOSL_HUMAN ICOS ligand
Q9ULL4	PLXNB3	0.0111872	1.21745	PLXB3_HUMAN Plexin-B3
Q8WTR4	GDPD5	0.00423906	1.21684	GDPD5_HUMAN Glycerophosphodiester phosphodiesterase domain-containing protein 5
P09960	LTA4H	0.0167278	1.2168	LKHA4_HUMAN Leukotriene A-4 hydrolase
Q8TEQ8	PIGO	0.0466058	1.21597	PIGO_HUMAN GPI ethanolamine phosphate transferase 3
O95297	MPZL1	0.00615942	1.21494	MPZL1_HUMAN Myelin protein zero-like protein 1
O75436	VPS26A	0.0488349	1.21492	VP26A_HUMAN Vacuolar protein sorting-associated protein 26A
Q2Y0W8	SLC4A8	0.0104638	1.2137	S4A8_HUMAN Electroneutral sodium bicarbonate exchanger 1
Q14194	CRMP1	0.0128068	1.21271	DPYL1_HUMAN Dihydropyrimidinase-related protein 1
Q92633	LPAR1	0.02939	1.20889	LPAR1_HUMAN Lysophosphatidic acid receptor 1
P42765	ACAA2	0.0361676	1.20697	THIM_HUMAN 3-ketoacyl-CoA thiolase, mitochondrial
Q9HBA0	TRPV4	0.0120379	1.20492	TRPV4_HUMAN Transient receptor potential cation channel subfamily V member 4
Q9BU23	LMF2	0.0357899	1.20479	LMF2_HUMAN Lipase maturation factor 2
O43772	SLC25A20	0.0458427	1.20436	MCAT_HUMAN Mitochondrial carnitine/acylcarnitine carrier protein
Q03164	KMT2A	0.0334049	1.2024	KMT2A_HUMAN Histone-lysine N-methyltransferase 2A
P51797	CLCN6	0.0141081	1.20233	CLCN6_HUMAN Chloride transport protein 6
P00414	MT-CO3	0.00678719	1.20086	COX3_HUMAN Cytochrome c oxidase subunit 3
P63241	EIF5A	0.0307475	1.19983	IF5A1_HUMAN Eukaryotic translation initiation factor 5A-1
P06753	TPM3	0.0425275	1.19548	TPM3_HUMAN Tropomyosin alpha-3 chain
P60981	DSTN	0.00606303	1.19498	DEST_HUMAN Destrin
P42356	PI4KA	0.0284387	1.19435	PI4KA_HUMAN Phosphatidylinositol 4-kinase alpha
Q8NBJ9	SIDT2	0.0100856	1.194	SIDT2_HUMAN SID1 transmembrane family member 2
O75976	CPD	0.0352907	1.19132	CBPD_HUMAN Carboxypeptidase D
Q96FZ2	HMCES	0.049204	1.19081	HMCES_HUMAN Embryonic stem cell-specific 5-hydroxymethylcytosine-binding protein
Q9H3K2	GHITM	0.0328996	1.1904	GHITM_HUMAN Growth hormone-inducible transmembrane protein
Q86SK9	SCD5	0.0173201	1.18939	SCD5_HUMAN Stearoyl-CoA desaturase 5
P13473	LAMP2	0.0123447	1.18922	LAMP2_HUMAN Lysosome-associated membrane glycoprotein 2
O75074	LRP3	0.00816	1.18483	LRP3_HUMAN Low-density lipoprotein receptor-related protein 3
P53007	SLC25A1	0.0348923	1.18439	TXTP_HUMAN Tricarboxylate transport protein, mitochondrial
P16070	CD44	0.0028719	1.18286	CD44_HUMAN CD44 antigen
Q6P4A7	SFXN4	0.0302573	1.18283	SFXN4_HUMAN Sideroflexin-4
Q9UJA9	ENPP5	0.0301439	1.18247	ENPP5_HUMAN Ectonucleotide pyrophosphatase/phosphodiesterase family member 5
Q9NQ34	TMEM9B	0.0098737	1.18175	TMM9B_HUMAN Transmembrane protein 9B
Q969M3	YIPF5	0.0338696	1.1812	YIPF5_HUMAN Protein YIPF5
P00156	MT-CYB	0.00255647	1.17847	CYB_HUMAN Cytochrome b
P46776	RPL27A	0.0468792	1.1758	RL27A_HUMAN 60S ribosomal protein L27a
P24666	ACP1	0.0260172	1.17565	PPAC_HUMAN Low molecular weight phosphotyrosine protein phosphatase
Q9BTX1	NDC1	0.0185862	1.17474	NDC1_HUMAN Nucleoporin NDC1
P29322	EPHA8	0.0438299	1.17278	EPHA8_HUMAN Ephrin type-A receptor 8
P48960	CD97	0.00461466	1.17103	CD97_HUMAN CD97 antigen
P18433	PTPRA	0.010403	1.16915	PTPRA_HUMAN Receptor-type tyrosine-protein phosphatase alpha
Q9NXL6	SIDT1	0.00847618	1.16882	SIDT1_HUMAN SID1 transmembrane family member 1
Q8NE00	TMEM104	0.0255388	1.16539	TM104_HUMAN Transmembrane protein 104
Q02252	ALDH6A1	0.000820692	1.16531	MMSA_HUMAN Methylmalonate-semialdehyde dehydrogenase [acylating], mitochondrial
O14798	TNFRSF10C	0.00327997	1.16317	TR10C_HUMAN Tumor necrosis factor receptor superfamily member 10C
Q08174	PCDH1	0.0280485	1.16018	PCDH1_HUMAN Protocadherin-1
Q6UWP7	LCLAT1	0.03913	1.16012	LCLT1_HUMAN Lysocardiolipin acyltransferase 1
P63220	RPS21	0.0172978	1.15966	RS21_HUMAN 40S ribosomal protein S21
Q9UP95	SLC12A4	0.012841	1.1592	S12A4_HUMAN Solute carrier family 12 member 4
Q15303	ERBB4	0.00968724	1.15824	ERBB4_HUMAN Receptor tyrosine-protein kinase erbB-4
P24390	KDELR1	0.0416102	1.15737	ERD21_HUMAN ER lumen protein retaining receptor 1
Q6AI14	SLC9A4	0.00649785	1.15586	SL9A4_HUMAN Sodium/hydrogen exchanger 4
P29320	EPHA3	0.0238314	1.15313	EPHA3_HUMAN Ephrin type-A receptor 3
P34932	HSPA4	0.0209165	1.15199	HSP74_HUMAN Heat shock 70 kDa protein 4
P19634	SLC9A1	0.00918904	1.14976	SL9A1_HUMAN Sodium/hydrogen exchanger 1
Q6P995	FAM171B	0.00801014	1.14543	F171B_HUMAN Protein FAM171B
P20645	M6PR	0.0384521	1.14511	MPRD_HUMAN Cation-dependent mannose-6-phosphate receptor
Q9HCN3	TMEM8A	0.00429428	1.13997	TMM8A_HUMAN Transmembrane protein 8A
Q969L2	MAL2	0.041114	1.13564	MAL2_HUMAN Protein MAL2
Q9BXB1	LGR4	0.0280363	1.13398	LGR4_HUMAN Leucine-rich repeat-containing G-protein coupled receptor 4
Q96NB2	SFXN2	0.0273137	1.13263	SFXN2_HUMAN Sideroflexin-2
P13498	CYBA	0.0276987	1.13202	CY24A_HUMAN Cytochrome b-245 light chain
Q9H7F0	ATP13A3	0.0301821	1.12093	AT133_HUMAN Probable cation-transporting ATPase 13A3
O15260	SURF4	0.0480419	1.11612	SURF4_HUMAN Surfeit locus protein 4
Q92673	SORL1	0.0278215	1.11533	SORL_HUMAN Sortilin-related receptor
O43194	GPR39	0.0232161	1.1117	GPR39_HUMAN G-protein coupled receptor 39
Q5SS58	MICA	0.00892072	1.1081	Q5SS58_HUMAN MHC class I polypeptide-related sequence A
P00846	MT-ATP6	0.033766	1.10722	ATP6_HUMAN ATP synthase subunit a
P09131	SLC10A3	0.000586125	1.1026	P3_HUMAN P3 protein
P02795	MT2A	0.0127567	1.09883	MT2_HUMAN Metallothionein-2
A6NHL2	TUBAL3	0.018231	1.09283	TBAL3_HUMAN Tubulin alpha chain-like 3
Q9NZ01	TECR	0.00209691	1.07332	TECR_HUMAN Very-long-chain enoyl-CoA reductase
P60709	ACTB	0.0419749	1.06703	ACTB_HUMAN Actin, cytoplasmic 1
O95478	NSA2	0.0225497	1.06623	NSA2_HUMAN Ribosome biogenesis protein NSA2 homolog
Q9BXP2	SLC12A9	0.0482859	1.05588	S12A9_HUMAN Solute carrier family 12 member 9
P82914	MRPS15	0.0260256	1.05389	RT15_HUMAN 28S ribosomal protein S15, mitochondrial
P07954	FH	0.041835	1.04915	FUMH_HUMAN Fumarate hydratase, mitochondrial
A1L3X0	ELOVL7	0.0461626	1.04066	ELOV7_HUMAN Elongation of very long chain fatty acids protein 7
Q9UIW2	PLXNA1	0.00310099	0.942047	PLXA1_HUMAN Plexin-A1
Q8IZP9	GPR64	0.0362577	0.938328	GPR64_HUMAN G-protein coupled receptor 64
O00767	SCD	0.0182663	0.933416	ACOD_HUMAN Acyl-CoA desaturase
P00533	EGFR	0.0151227	0.917298	EGFR_HUMAN Epidermal growth factor receptor
P27448	MARK3	0.0177443	0.914595	MARK3_HUMAN MAP/microtubule affinity-regulating kinase 3
Q9UGT4	SUSD2	0.00983943	0.902153	SUSD2_HUMAN Sushi domain-containing protein 2
Q9UHQ9	CYB5R1	0.0358105	0.886056	NB5R1_HUMAN NADH-cytochrome b5 reductase 1
Q8TBP6	SLC25A40	0.0490129	0.882559	S2540_HUMAN Solute carrier family 25 member 40
Q86WK6	AMIGO1	0.0118872	0.879795	AMGO1_HUMAN Amphoterin-induced protein 1
P23975	SLC6A2	0.00664676	0.87943	SC6A2_HUMAN Sodium-dependent noradrenaline transporter
Q9C0C4	SEMA4C	0.0179564	0.874913	SEM4C_HUMAN Semaphorin-4C
O75752	B3GALNT1	0.0388669	0.865763	B3GL1_HUMAN UDP-GalNAc:beta-1,3-N-acetylgalactosaminyltransferase 1
Q92729	PTPRU	0.00282495	0.861856	PTPRU_HUMAN Receptor-type tyrosine-protein phosphatase U
P54760	EPHB4	0.00668298	0.859016	EPHB4_HUMAN Ephrin type-B receptor 4
P16144	ITGB4	0.0113674	0.856713	ITB4_HUMAN Integrin beta-4
Q9UN70	PCDHGC3	0.00720012	0.85564	PCDGK_HUMAN Protocadherin gamma-C3
Q13308	PTK7	0.0100494	0.849042	PTK7_HUMAN Inactive tyrosine-protein kinase 7
Q8TB96	ITFG1	0.0291635	0.846571	TIP_HUMAN T-cell immunomodulatory protein
P18124	RPL7	0.0458216	0.844493	RL7_HUMAN 60S ribosomal protein L7
Q12913	PTPRJ	0.0159023	0.843059	PTPRJ_HUMAN Receptor-type tyrosine-protein phosphatase eta
Q9H8P0	SRD5A3	0.0180397	0.837615	PORED_HUMAN Polyprenol reductase
Q13286	CLN3	0.00114262	0.833711	CLN3_HUMAN Battenin
Q9NRS4	TMPRSS4	0.0220526	0.83024	TMPS4_HUMAN Transmembrane protease serine 4
Q9Y4D7	PLXND1	0.00841899	0.82959	PLXD1_HUMAN Plexin-D1
P21802	FGFR2	0.0127368	0.822983	FGFR2_HUMAN Fibroblast growth factor receptor 2
O75915	ARL6IP5	0.0371955	0.821069	PRAF3_HUMAN PRA1 family protein 3
Q9NQC3	RTN4	0.0409534	0.818244	RTN4_HUMAN Reticulon-4
Q8WWY8	LIPH	0.0096654	0.817366	LIPH_HUMAN Lipase member H
Q9C0K1	SLC39A8	0.0266938	0.813059	S39A8_HUMAN Zinc transporter ZIP8
Q5VWQ0	RSBN1	0.00487517	0.81158	RSBN1_HUMAN Round spermatid basic protein 1
Q8TC12	RDH11	0.0328943	0.809084	RDH11_HUMAN Retinol dehydrogenase 11
O95477	ABCA1	0.0332943	0.807792	ABCA1_HUMAN ATP-binding cassette sub-family A member 1
Q8N441	FGFRL1	0.0319544	0.802707	FGRL1_HUMAN Fibroblast growth factor receptor-like 1
A2RU67	KIAA1467	0.0191192	0.80158	K1467_HUMAN Uncharacterized protein KIAA1467
Q04760	GLO1	0.0118919	0.800707	LGUL_HUMAN Lactoylglutathione lyase
P18564	ITGB6	0.00655104	0.795413	ITB6_HUMAN Integrin beta-6
H0YNA2	SPPL2A	0.0191258	0.791421	H0YNA2_HUMAN Signal peptide peptidase-like 2A (Fragment)
Q14833	GRM4	0.022135	0.788246	GRM4_HUMAN Metabotropic glutamate receptor 4
Q7KYR7	BTN2A1	0.0395094	0.783277	BT2A1_HUMAN Butyrophilin subfamily 2 member A1
Q15043	SLC39A14	0.0124374	0.782442	S39AE_HUMAN Zinc transporter ZIP14
Q9UBG0	MRC2	0.0239254	0.780223	MRC2_HUMAN C-type mannose receptor 2
Q9Y6A9	SPCS1	0.00387133	0.775285	SPCS1_HUMAN Signal peptidase complex subunit 1
O60486	PLXNC1	0.0338244	0.771364	PLXC1_HUMAN Plexin-C1
O14786	NRP1	0.0184646	0.768592	NRP1_HUMAN Neuropilin-1
Q7Z7G8	VPS13B	0.0447384	0.768016	VP13B_HUMAN Vacuolar protein sorting-associated protein 13B
P42892	ECE1	0.0350986	0.767825	ECE1_HUMAN Endothelin-converting enzyme 1
P35613	BSG	0.0283374	0.766324	BASI_HUMAN Basigin
Q9BRN9	TM2D3	0.0277058	0.766238	TM2D3_HUMAN TM2 domain-containing protein 3
P78536	ADAM17	0.00597998	0.763616	ADA17_HUMAN Disintegrin and metalloproteinase domain-containing protein 17
P14672	SLC2A4	0.0161369	0.760954	GTR4_HUMAN Solute carrier family 2, facilitated glucose transporter member 4
O95490	LPHN2	0.0228834	0.759459	LPHN2_HUMAN Latrophilin-2
E9PIE4	MTCH2	0.0421493	0.759096	E9PIE4_HUMAN Mitochondrial carrier homolog 2 (Fragment)
O75683	SURF6	0.0432623	0.755628	SURF6_HUMAN Surfeit locus protein 6
Q9BX74	TM2D1	0.00303627	0.749802	TM2D1_HUMAN TM2 domain-containing protein 1
Q6EMK4	VASN	0.0141159	0.748398	VASN_HUMAN Vasorin
Q9NPH3	IL1RAP	0.0134054	0.747814	IL1AP_HUMAN Interleukin-1 receptor accessory protein
P06213	INSR	0.00598398	0.747018	INSR_HUMAN Insulin receptor
O75882	ATRN	0.0267504	0.74645	ATRN_HUMAN Attractin
O43570	CA12	0.0266545	0.744497	CAH12_HUMAN Carbonic anhydrase 12
Q9NPG1	FZD3	0.00108435	0.739868	FZD3_HUMAN Frizzled-3
O76062	TM7SF2	0.0254712	0.738543	ERG24_HUMAN Delta(14)-sterol reductase
O75084	FZD7	0.0113099	0.735508	FZD7_HUMAN Frizzled-7
P12821	ACE	0.0237165	0.731171	ACE_HUMAN Angiotensin-converting enzyme
Q6UWB1	IL27RA	0.0216696	0.722974	I27RA_HUMAN Interleukin-27 receptor subunit alpha
O60602	TLR5	0.0452418	0.72269	TLR5_HUMAN Toll-like receptor 5
P54289	CACNA2D1	0.00472825	0.718249	CA2D1_HUMAN Voltage-dependent calcium channel subunit alpha-2/delta-1
Q9UIS9	MBD1	0.00847227	0.716376	MBD1_HUMAN Methyl-CpG-binding domain protein 1
Q6UXI9	NPNT	0.00244472	0.713114	NPNT_HUMAN Nephronectin
P30988	CALCR	0.00485188	0.707411	CALCR_HUMAN Calcitonin receptor
Q9H993	C6orf211	0.016734	0.706854	CF211_HUMAN UPF0364 protein C6orf211
P98160	HSPG2	0.00639617	0.703905	PGBM_HUMAN Basement membrane-specific heparan sulfate proteoglycan core protein
O60353	FZD6	0.0175493	0.703067	FZD6_HUMAN Frizzled-6
Q16595	FXN	0.0372915	0.701626	FRDA_HUMAN Frataxin, mitochondrial
A2AC57	MICB	0.0115136	0.69768	A2AC57_HUMAN MHC class I polypeptide-related sequence B
O75323	GBAS	0.0427091	0.697063	NIPS2_HUMAN Protein NipSnap homolog 2
Q9NY47	CACNA2D2	0.0460416	0.696387	CA2D2_HUMAN Voltage-dependent calcium channel subunit alpha-2/delta-2
Q03154	ACY1	0.012873	0.690084	ACY1_HUMAN Aminoacylase-1
O94910	LPHN1	0.00408837	0.689982	LPHN1_HUMAN Latrophilin-1
Q9BUN8	DERL1	0.0274246	0.689101	DERL1_HUMAN Derlin-1
Q8NFC6	BOD1L1	0.0321322	0.687415	BD1L1_HUMAN Biorientation of chromosomes in cell division protein 1-like 1
Q6PCB8	EMB	6.93633e-05	0.68448	EMB_HUMAN Embigin
Q9BUI4	POLR3C	0.0259137	0.683999	RPC3_HUMAN DNA-directed RNA polymerase III subunit RPC3
P17181	IFNAR1	0.000424972	0.682694	INAR1_HUMAN Interferon alpha/beta receptor 1
Q9Y277	VDAC3	0.0470349	0.678629	VDAC3_HUMAN Voltage-dependent anion-selective channel protein 3
O00483	NDUFA4	0.0376002	0.678324	NDUA4_HUMAN NADH dehydrogenase [ubiquinone] 1 alpha subcomplex subunit 4
Q9Y6C9	MTCH2	0.0306225	0.666194	MTCH2_HUMAN Mitochondrial carrier homolog 2
O00241	SIRPB1	0.00673876	0.664184	SIRB1_HUMAN Signal-regulatory protein beta-1
Q8N6C5	IGSF1	0.0125386	0.66135	IGSF1_HUMAN Immunoglobulin superfamily member 1
O00468	AGRN	0.0468565	0.661329	AGRIN_HUMAN Agrin
Q9UHN6	TMEM2	0.00688858	0.660064	TMEM2_HUMAN Transmembrane protein 2
Q13467	FZD5	0.0200064	0.656668	FZD5_HUMAN Frizzled-5
Q9H6F5	CCDC86	0.0464879	0.656582	CCD86_HUMAN Coiled-coil domain-containing protein 86
P78504	JAG1	0.00472542	0.653321	JAG1_HUMAN Protein jagged-1
P05026	ATP1B1	0.0205575	0.652931	AT1B1_HUMAN Sodium/potassium-transporting ATPase subunit beta-1
P21860	ERBB3	0.00556814	0.64993	ERBB3_HUMAN Receptor tyrosine-protein kinase erbB-3
Q9H920	RNF121	0.019362	0.64889	RN121_HUMAN RING finger protein 121
A4D0S4	LAMB4	0.00798528	0.645393	LAMB4_HUMAN Laminin subunit beta-4
Q7Z5N4	SDK1	0.0147707	0.636732	SDK1_HUMAN Protein sidekick-1
Q8N271	PROM2	0.0307334	0.633799	PROM2_HUMAN Prominin-2
Q9P2B2	PTGFRN	0.0029944	0.633029	FPRP_HUMAN Prostaglandin F2 receptor negative regulator
O00151	PDLIM1	0.0301079	0.628846	PDLI1_HUMAN PDZ and LIM domain protein 1
P21589	NT5E	0.0141117	0.627352	5NTD_HUMAN 5'-nucleotidase
P30414	NKTR	0.0277115	0.626027	NKTR_HUMAN NK-tumor recognition protein
O14817	TSPAN4	0.0102122	0.625209	TSN4_HUMAN Tetraspanin-4
P04626	ERBB2	0.00089419	0.620361	ERBB2_HUMAN Receptor tyrosine-protein kinase erbB-2
Q9HCU4	CELSR2	0.022989	0.619059	CELR2_HUMAN Cadherin EGF LAG seven-pass G-type receptor 2
Q9UMF0	ICAM5	0.00702732	0.612992	ICAM5_HUMAN Intercellular adhesion molecule 5
Q9BZM6	ULBP1	0.0452054	0.612555	N2DL1_HUMAN NKG2D ligand 1
A8MUU1	FABP5P3	0.0276077	0.611856	FB5L3_HUMAN Putative fatty acid-binding protein 5-like protein 3
O96028	WHSC1	0.00718886	0.611838	NSD2_HUMAN Histone-lysine N-methyltransferase NSD2
Q92485	SMPDL3B	0.00403357	0.611259	ASM3B_HUMAN Acid sphingomyelinase-like phosphodiesterase 3b
O75326	SEMA7A	0.00311444	0.604359	SEM7A_HUMAN Semaphorin-7A
Q14061	COX17	0.00857137	0.60135	COX17_HUMAN Cytochrome c oxidase copper chaperone
Q14517	FAT1	0.0187837	0.601038	FAT1_HUMAN Protocadherin Fat 1
P22413	ENPP1	0.00143675	0.598994	ENPP1_HUMAN Ectonucleotide pyrophosphatase/phosphodiesterase family member 1
P56199	ITGA1	0.0236761	0.590086	ITA1_HUMAN Integrin alpha-1
B4DWP7	LGALS9	0.0354152	0.582234	B4DWP7_HUMAN Galectin
Q9H1U4	MEGF9	0.0124575	0.581687	MEGF9_HUMAN Multiple epidermal growth factor-like domains protein 9
Q8TB22	SPATA20	0.0214679	0.576851	SPT20_HUMAN Spermatogenesis-associated protein 20
P05556	ITGB1	0.00123186	0.571579	ITB1_HUMAN Integrin beta-1
Q15223	PVRL1	0.00295073	0.569647	PVRL1_HUMAN Poliovirus receptor-related protein 1
P18084	ITGB5	0.00778574	0.568043	ITB5_HUMAN Integrin beta-5
Q7L0Y3	TRMT10C	0.031463	0.56294	MRRP1_HUMAN Mitochondrial ribonuclease P protein 1
P15151	PVR	0.00155905	0.562739	PVR_HUMAN Poliovirus receptor
Q8N2G4	LYPD1	0.0111163	0.561829	LYPD1_HUMAN Ly6/PLAUR domain-containing protein 1
P45880	VDAC2	0.0219786	0.561276	VDAC2_HUMAN Voltage-dependent anion-selective channel protein 2
O00592	PODXL	0.0127424	0.555621	PODXL_HUMAN Podocalyxin
P62942	FKBP1A	0.0260928	0.555298	FKB1A_HUMAN Peptidyl-prolyl cis-trans isomerase FKBP1A
O15394	NCAM2	0.00958186	0.540528	NCAM2_HUMAN Neural cell adhesion molecule 2
P08069	IGF1R	0.0113705	0.529442	IGF1R_HUMAN Insulin-like growth factor 1 receptor
O15230	LAMA5	0.0140243	0.525685	LAMA5_HUMAN Laminin subunit alpha-5
Q7Z3B1	NEGR1	0.0327982	0.521627	NEGR1_HUMAN Neuronal growth regulator 1
Q58EX2	SDK2	0.0185785	0.512656	SDK2_HUMAN Protein sidekick-2
Q9NYQ6	CELSR1	0.0206609	0.510379	CELR1_HUMAN Cadherin EGF LAG seven-pass G-type receptor 1
P08195	SLC3A2	0.00556634	0.509471	4F2_HUMAN 4F2 cell-surface antigen heavy chain
Q96GX1	TCTN2	0.00176445	0.507186	TECT2_HUMAN Tectonic-2
O75054	IGSF3	0.0128686	0.504624	IGSF3_HUMAN Immunoglobulin superfamily member 3
O15460	P4HA2	0.0241986	0.498937	P4HA2_HUMAN Prolyl 4-hydroxylase subunit alpha-2
Q29983	MICA	0.0156333	0.497901	MICA_HUMAN MHC class I polypeptide-related sequence A
P07942	LAMB1	0.0264765	0.497766	LAMB1_HUMAN Laminin subunit beta-1
Q9Y639	NPTN	0.019751	0.496798	NPTN_HUMAN Neuroplastin
P13987	CD59	0.00448384	0.492696	CD59_HUMAN CD59 glycoprotein
Q9UBC2	EPS15L1	0.0240292	0.489408	EP15R_HUMAN Epidermal growth factor receptor substrate 15-like 1
O95810	SDPR	0.00865665	0.479925	SDPR_HUMAN Serum deprivation-response protein
Q92823	NRCAM	9.62521e-05	0.475893	NRCAM_HUMAN Neuronal cell adhesion molecule
P55268	LAMB2	0.0065441	0.474757	LAMB2_HUMAN Laminin subunit beta-2
Q8NFZ8	CADM4	0.000913503	0.471925	CADM4_HUMAN Cell adhesion molecule 4
Q96AP7	ESAM	0.000692612	0.470064	ESAM_HUMAN Endothelial cell-selective adhesion molecule
P06731	CEACAM5	0.00573297	0.467394	CEAM5_HUMAN Carcinoembryonic antigen-related cell adhesion molecule 5
P33151	CDH5	0.00211578	0.463818	CADH5_HUMAN Cadherin-5
P06756	ITGAV	0.000249259	0.462678	ITAV_HUMAN Integrin alpha-V
Q86SJ2	AMIGO2	0.00578789	0.461976	AMGO2_HUMAN Amphoterin-induced protein 2
P17301	ITGA2	0.00193834	0.460311	ITA2_HUMAN Integrin alpha-2
P11047	LAMC1	0.00463063	0.455373	LAMC1_HUMAN Laminin subunit gamma-1
P05362	ICAM1	0.0153865	0.451585	ICAM1_HUMAN Intercellular adhesion molecule 1
P26006	ITGA3	0.00329124	0.428655	ITA3_HUMAN Integrin alpha-3
A1L157	TSPAN11	0.00123041	0.419869	TSN11_HUMAN Tetraspanin-11
Q86Y78	LYPD6	0.0149661	0.416013	LYPD6_HUMAN Ly6/PLAUR domain-containing protein 6
P52799	EFNB2	0.0145489	0.406568	EFNB2_HUMAN Ephrin-B2
O00533	CHL1	0.00325499	0.392246	CHL1_HUMAN Neural cell adhesion molecule L1-like protein
P19256	CD58	0.00368536	0.39097	LFA3_HUMAN Lymphocyte function-associated antigen 3
Q9NX58	LYAR	0.0381391	0.387578	LYAR_HUMAN Cell growth-regulating nucleolar protein
O60896	RAMP3	0.0201502	0.386813	RAMP3_HUMAN Receptor activity-modifying protein 3
Q14126	DSG2	0.0024006	0.382028	DSG2_HUMAN Desmoglein-2
P49321	NASP	0.00668175	0.381036	NASP_HUMAN Nuclear autoantigenic sperm protein
Q9HC56	PCDH9	0.00423243	0.380166	PCDH9_HUMAN Protocadherin-9
Q8WXI7	MUC16	0.00756328	0.377495	MUC16_HUMAN Mucin-16
Q9BZA7	PCDH11X	0.010888	0.371566	PC11X_HUMAN Protocadherin-11 X-linked
Q12849	GRSF1	0.0245759	0.363357	GRSF1_HUMAN G-rich sequence factor 1
P35269	GTF2F1	0.0337318	0.362509	T2FA_HUMAN General transcription factor IIF subunit 1
E7EMF1	ITGA2	0.000260868	0.339342	E7EMF1_HUMAN Integrin alpha-2
P08174	CD55	0.00376608	0.334292	DAF_HUMAN Complement decay-accelerating factor
P16152	CBR1	0.00498012	0.330873	CBR1_HUMAN Carbonyl reductase [NADPH] 1
P16104	H2AFX	0.00882348	0.324797	H2AX_HUMAN Histone H2AX
Q9NY27	PPP4R2	0.0417369	0.271008	PP4R2_HUMAN Serine/threonine-protein phosphatase 4 regulatory subunit 2
Q02487	DSC2	0.00518967	0.240632	DSC2_HUMAN Desmocollin-2
Q12765	SCRN1	0.0127195	0.195105	SCRN1_HUMAN Secernin-1
Q9HC35	EML4	0.0237159	0.161181	EMAL4_HUMAN Echinoderm microtubule-associated protein-like 4
O15372	EIF3H	0.01344	0.117109	EIF3H_HUMAN Eukaryotic translation initiation factor 3 subunit H
P62306	SNRPF	0.0894314	4.50002	RUXF_HUMAN Small nuclear ribonucleoprotein F
P60763	RAC3	0.0704742	4.13942	RAC3_HUMAN Ras-related C3 botulinum toxin substrate 3
P0C0S5	H2AFZ	0.289148	3.55892	H2AZ_HUMAN Histone H2A.Z
P05114	HMGN1	0.0923762	3.37108	HMGN1_HUMAN Non-histone chromosomal protein HMG-14
Q8IUE6	HIST2H2AB	0.270837	3.2063	H2A2B_HUMAN Histone H2A type 2-B
Q01105	SET	0.0981635	3.11854	SET_HUMAN Protein SET
P05387	RPLP2	0.058047	2.93606	RLA2_HUMAN 60S acidic ribosomal protein P2
Q8N257	HIST3H2BB	0.317168	2.77912	H2B3B_HUMAN Histone H2B type 3-B
Q9BXR6	CFHR5	0.0655254	2.77853	FHR5_HUMAN Complement factor H-related protein 5
Q8WXF1	PSPC1	0.163091	2.75551	PSPC1_HUMAN Paraspeckle component 1
Q13442	PDAP1	0.0676099	2.6868	HAP28_HUMAN 28 kDa heat- and acid-stable phosphoprotein
Q96AE4	FUBP1	0.137334	2.6295	FUBP1_HUMAN Far upstream element-binding protein 1
O75937	DNAJC8	0.0511399	2.59409	DNJC8_HUMAN DnaJ homolog subfamily C member 8
Q9NQG5	RPRD1B	0.14075	2.50628	RPR1B_HUMAN Regulation of nuclear pre-mRNA domain-containing protein 1B
P06307	CCK	0.47321	2.5033	CCKN_HUMAN Cholecystokinin
O60869	EDF1	0.0690924	2.47586	EDF1_HUMAN Endothelial differentiation-related factor 1
Q12907	LMAN2	0.0649651	2.44142	LMAN2_HUMAN Vesicular integral-membrane protein VIP36
P62316	SNRPD2	0.174299	2.43903	SMD2_HUMAN Small nuclear ribonucleoprotein Sm D2
Q92599	43716	0.0535143	2.43419	SEPT8_HUMAN Septin-8
P53999	SUB1	0.193826	2.43034	TCP4_HUMAN Activated RNA polymerase II transcriptional coactivator p15
Q8N684	CPSF7	0.206264	2.42009	CPSF7_HUMAN Cleavage and polyadenylation specificity factor subunit 7
P11234	RALB	0.122649	2.37617	RALB_HUMAN Ras-related protein Ral-B
Q15428	SF3A2	0.0803637	2.36835	SF3A2_HUMAN Splicing factor 3A subunit 2
P62318	SNRPD3	0.272374	2.3225	SMD3_HUMAN Small nuclear ribonucleoprotein Sm D3
Q13283	G3BP1	0.133561	2.31222	G3BP1_HUMAN Ras GTPase-activating protein-binding protein 1
P60900	PSMA6	0.131263	2.26956	PSA6_HUMAN Proteasome subunit alpha type-6
P12814	ACTN1	0.0626758	2.2656	ACTN1_HUMAN Alpha-actinin-1
P82979	SARNP	0.118121	2.26007	SARNP_HUMAN SAP domain-containing ribonucleoprotein
O43707	ACTN4	0.0876193	2.24288	ACTN4_HUMAN Alpha-actinin-4
P55884	EIF3B	0.169314	2.23538	EIF3B_HUMAN Eukaryotic translation initiation factor 3 subunit B
P30049	ATP5D	0.105434	2.22447	ATPD_HUMAN ATP synthase subunit delta, mitochondrial
Q86U42	PABPN1	0.268779	2.22422	PABP2_HUMAN Polyadenylate-binding protein 2
Q9UBS4	DNAJB11	0.120902	2.22331	DJB11_HUMAN DnaJ homolog subfamily B member 11
P29692	EEF1D	0.103466	2.21977	EF1D_HUMAN Elongation factor 1-delta
Q9BYE2	TMPRSS13	0.116827	2.20766	TMPSD_HUMAN Transmembrane protease serine 13
P06899	HIST1H2BJ	0.336403	2.20702	H2B1J_HUMAN Histone H2B type 1-J
O60814	HIST1H2BK	0.243468	2.18298	H2B1K_HUMAN Histone H2B type 1-K
Q9UHX1	PUF60	0.249703	2.16986	PUF60_HUMAN Poly(U)-binding-splicing factor PUF60
Q14444	CAPRIN1	0.0927321	2.15763	CAPR1_HUMAN Caprin-1
O60884	DNAJA2	0.0900637	2.10777	DNJA2_HUMAN DnaJ homolog subfamily A member 2
Q3ZCQ8	TIMM50	0.0683219	2.10353	TIM50_HUMAN Mitochondrial import inner membrane translocase subunit TIM50
O00479	HMGN4	0.10481	2.09897	HMGN4_HUMAN High mobility group nucleosome-binding domain-containing protein 4
Q15459	SF3A1	0.34882	2.08861	SF3A1_HUMAN Splicing factor 3A subunit 1
Q9P013	CWC15	0.20515	2.08612	CWC15_HUMAN Spliceosome-associated protein CWC15 homolog
Q9NZZ3	CHMP5	0.0534392	2.07478	CHMP5_HUMAN Charged multivesicular body protein 5
P23588	EIF4B	0.0740457	2.06934	IF4B_HUMAN Eukaryotic translation initiation factor 4B
Q8WVM7	STAG1	0.074307	2.04679	STAG1_HUMAN Cohesin subunit SA-1
Q01844	EWSR1	0.0813786	2.02999	EWS_HUMAN RNA-binding protein EWS
P25705	ATP5A1	0.128219	2.02694	ATPA_HUMAN ATP synthase subunit alpha, mitochondrial
Q15233	NONO	0.325501	2.02675	NONO_HUMAN Non-POU domain-containing octamer-binding protein
P62805	HIST1H4A	0.259945	2.02466	H4_HUMAN Histone H4
Q15363	TMED2	0.191965	2.01946	TMED2_HUMAN Transmembrane emp24 domain-containing protein 2
Q13363	CTBP1	0.0535464	2.00205	CTBP1_HUMAN C-terminal-binding protein 1
Q7RTV0	PHF5A	0.0562652	1.9978	PHF5A_HUMAN PHD finger-like domain-containing protein 5A
Q9HCK5	AGO4	0.0814442	1.99514	AGO4_HUMAN Protein argonaute-4
Q9UQE7	SMC3	0.0584386	1.98842	SMC3_HUMAN Structural maintenance of chromosomes protein 3
P0C0S8	HIST1H2AG	0.397064	1.97898	H2A1_HUMAN Histone H2A type 1
P04908	HIST1H2AB	0.338811	1.97573	H2A1B_HUMAN Histone H2A type 1-B/E
P49447	CYB561	0.0824081	1.97492	CY561_HUMAN Cytochrome b561
P27695	APEX1	0.0934437	1.96855	APEX1_HUMAN DNA-(apurinic or apyrimidinic site) lyase
Q14789	GOLGB1	0.15471	1.96756	GOGB1_HUMAN Golgin subfamily B member 1
P67870	CSNK2B	0.0583244	1.95325	CSK2B_HUMAN Casein kinase II subunit beta
P39656	DDOST	0.289005	1.94405	OST48_HUMAN Dolichyl-diphosphooligosaccharide--protein glycosyltransferase 48 kDa subunit
P60866	RPS20	0.244059	1.9322	RS20_HUMAN 40S ribosomal protein S20
P62913	RPL11	0.136677	1.92117	RL11_HUMAN 60S ribosomal protein L11
Q9UJZ1	STOML2	0.178469	1.9174	STML2_HUMAN Stomatin-like protein 2, mitochondrial
Q8WYB5	KAT6B	0.0762079	1.91474	KAT6B_HUMAN Histone acetyltransferase KAT6B
Q15393	SF3B3	0.260602	1.90835	SF3B3_HUMAN Splicing factor 3B subunit 3
P33992	MCM5	0.0510199	1.90747	MCM5_HUMAN DNA replication licensing factor MCM5
O43583	DENR	0.0622644	1.90457	DENR_HUMAN Density-regulated protein
O94905	ERLIN2	0.269599	1.89915	ERLN2_HUMAN Erlin-2
P38919	EIF4A3	0.276013	1.89905	IF4A3_HUMAN Eukaryotic initiation factor 4A-III
Q9HCD5	NCOA5	0.0538034	1.89644	NCOA5_HUMAN Nuclear receptor coactivator 5
Q8ND56	LSM14A	0.0546047	1.89362	LS14A_HUMAN Protein LSM14 homolog A
P23246	SFPQ	0.270157	1.88998	SFPQ_HUMAN Splicing factor, proline- and glutamine-rich
Q16181	43715	0.0541165	1.88477	SEPT7_HUMAN Septin-7
Q08AF3	SLFN5	0.0783376	1.86895	SLFN5_HUMAN Schlafen family member 5
P23229	ITGA6	0.121285	1.86452	ITA6_HUMAN Integrin alpha-6
P14927	UQCRB	0.0802583	1.85956	QCR7_HUMAN Cytochrome b-c1 complex subunit 7
P61026	RAB10	0.0706627	1.85951	RAB10_HUMAN Ras-related protein Rab-10
Q16531	DDB1	0.105281	1.85416	DDB1_HUMAN DNA damage-binding protein 1
P07919	UQCRH	0.153589	1.85169	QCR6_HUMAN Cytochrome b-c1 complex subunit 6, mitochondrial
P46783	RPS10	0.248052	1.84232	RS10_HUMAN 40S ribosomal protein S10
P48047	ATP5O	0.136913	1.83689	ATPO_HUMAN ATP synthase subunit O, mitochondrial
P33991	MCM4	0.231406	1.83487	MCM4_HUMAN DNA replication licensing factor MCM4
Q9UPN9	TRIM33	0.147742	1.83196	TRI33_HUMAN E3 ubiquitin-protein ligase TRIM33
Q5T8D3	ACBD5	0.210861	1.82278	ACBD5_HUMAN Acyl-CoA-binding domain-containing protein 5
Q15019	43710	0.158419	1.82051	SEPT2_HUMAN Septin-2
Q96D46	NMD3	0.0539859	1.81538	NMD3_HUMAN 60S ribosomal export protein NMD3
O43670	ZNF207	0.278825	1.81302	ZN207_HUMAN Zinc finger protein 207
Q92734	TFG	0.12943	1.81241	TFG_HUMAN Protein TFG
Q8NBM8	PCYOX1L	0.0964406	1.80684	PCYXL_HUMAN Prenylcysteine oxidase-like
P33993	MCM7	0.118929	1.80165	MCM7_HUMAN DNA replication licensing factor MCM7
Q9Y3F4	STRAP	0.0616907	1.79832	STRAP_HUMAN Serine-threonine kinase receptor-associated protein
P05198	EIF2S1	0.110023	1.79431	IF2A_HUMAN Eukaryotic translation initiation factor 2 subunit 1
A6NKH3	RPL37L	0.0790424	1.79081	RL37L_HUMAN Putative 60S ribosomal protein L37a-like
Q9NTJ3	SMC4	0.061228	1.78803	SMC4_HUMAN Structural maintenance of chromosomes protein 4
Q8NC56	LEMD2	0.0578669	1.77978	LEMD2_HUMAN LEM domain-containing protein 2
Q7L7X3	TAOK1	0.0572994	1.77931	TAOK1_HUMAN Serine/threonine-protein kinase TAO1
Q86UE4	MTDH	0.112253	1.77899	LYRIC_HUMAN Protein LYRIC
Q9BZZ5	API5	0.0577165	1.77832	API5_HUMAN Apoptosis inhibitor 5
Q2TAY7	SMU1	0.493092	1.7752	SMU1_HUMAN WD40 repeat-containing protein SMU1
Q9Y2H5	PLEKHA6	0.0711852	1.77481	PKHA6_HUMAN Pleckstrin homology domain-containing family A member 6
P10643	C7	0.0604686	1.77162	CO7_HUMAN Complement component C7
P54727	RAD23B	0.0821467	1.76913	RD23B_HUMAN UV excision repair protein RAD23 homolog B
Q96PK6	RBM14	0.338085	1.76543	RBM14_HUMAN RNA-binding protein 14
P49755	TMED10	0.104235	1.76326	TMEDA_HUMAN Transmembrane emp24 domain-containing protein 10
Q13838	DDX39B	0.139577	1.76113	DX39B_HUMAN Spliceosome RNA helicase DDX39B
Q9UHB9	SRP68	0.079117	1.75622	SRP68_HUMAN Signal recognition particle subunit SRP68
Q96T60	PNKP	0.0983558	1.75413	PNKP_HUMAN Bifunctional polynucleotide phosphatase/kinase
Q8NE71	ABCF1	0.143071	1.7537	ABCF1_HUMAN ATP-binding cassette sub-family F member 1
Q16891	IMMT	0.218844	1.75334	IMMT_HUMAN Mitochondrial inner membrane protein
Q9H0H5	RACGAP1	0.167737	1.74971	RGAP1_HUMAN Rac GTPase-activating protein 1
Q15437	SEC23B	0.062167	1.74571	SC23B_HUMAN Protein transport protein Sec23B
P62857	RPS28	0.329554	1.74542	RS28_HUMAN 40S ribosomal protein S28
Q15006	EMC2	0.2102	1.74404	EMC2_HUMAN ER membrane protein complex subunit 2
Q96A33	CCDC47	0.116479	1.74287	CCD47_HUMAN Coiled-coil domain-containing protein 47
Q13148	TARDBP	0.257741	1.74251	TADBP_HUMAN TAR DNA-binding protein 43
P52272	HNRNPM	0.267584	1.73865	HNRPM_HUMAN Heterogeneous nuclear ribonucleoprotein M
Q6PI48	DARS2	0.087275	1.73666	SYDM_HUMAN Aspartate--tRNA ligase, mitochondrial
P51659	HSD17B4	0.202762	1.73347	DHB4_HUMAN Peroxisomal multifunctional enzyme type 2
P98175	RBM10	0.178009	1.72571	RBM10_HUMAN RNA-binding protein 10
P67936	TPM4	0.122911	1.71775	TPM4_HUMAN Tropomyosin alpha-4 chain
Q13595	TRA2A	0.0825125	1.71451	TRA2A_HUMAN Transformer-2 protein homolog alpha
O95274	LYPD3	0.0706741	1.71376	LYPD3_HUMAN Ly6/PLAUR domain-containing protein 3
O95625	ZBTB11	0.0760852	1.70815	ZBT11_HUMAN Zinc finger and BTB domain-containing protein 11
P20042	EIF2S2	0.201886	1.70648	IF2B_HUMAN Eukaryotic translation initiation factor 2 subunit 2
Q9UPT8	ZC3H4	0.084419	1.70618	ZC3H4_HUMAN Zinc finger CCCH domain-containing protein 4
Q9NRX4	PHPT1	0.12509	1.70169	PHP14_HUMAN 14 kDa phosphohistidine phosphatase
P68104	EEF1A1	0.075884	1.70128	EF1A1_HUMAN Elongation factor 1-alpha 1
P35606	COPB2	0.131627	1.6989	COPB2_HUMAN Coatomer subunit beta'
P27694	RPA1	0.209164	1.69834	RFA1_HUMAN Replication protein A 70 kDa DNA-binding subunit
P25788	PSMA3	0.217777	1.69776	PSA3_HUMAN Proteasome subunit alpha type-3
P08240	SRPR	0.0895035	1.69594	SRPR_HUMAN Signal recognition particle receptor subunit alpha
P39748	FEN1	0.0939658	1.6954	FEN1_HUMAN Flap endonuclease 1
O60313	OPA1	0.233361	1.68565	OPA1_HUMAN Dynamin-like 120 kDa protein, mitochondrial
P25205	MCM3	0.0964695	1.68436	MCM3_HUMAN DNA replication licensing factor MCM3
Q96T23	RSF1	0.0737038	1.6832	RSF1_HUMAN Remodeling and spacing factor 1
P20339	RAB5A	0.082678	1.68281	RAB5A_HUMAN Ras-related protein Rab-5A
P06576	ATP5B	0.0963651	1.67995	ATPB_HUMAN ATP synthase subunit beta, mitochondrial
O14519	CDK2AP1	0.164086	1.67924	CDKA1_HUMAN Cyclin-dependent kinase 2-associated protein 1
Q5H8A4	PIGG	0.189746	1.67503	PIGG_HUMAN GPI ethanolamine phosphate transferase 2
P41223	BUD31	0.080904	1.67179	BUD31_HUMAN Protein BUD31 homolog
P08107	HSPA1A	0.155582	1.67056	HSP71_HUMAN Heat shock 70 kDa protein 1A/1B
Q96S66	CLCC1	0.274179	1.66971	CLCC1_HUMAN Chloride channel CLIC-like protein 1
O00148	DDX39A	0.0728669	1.66609	DX39A_HUMAN ATP-dependent RNA helicase DDX39A
Q9Y673	ALG5	0.0866363	1.66187	ALG5_HUMAN Dolichyl-phosphate beta-glucosyltransferase
P50995	ANXA11	0.0575453	1.66049	ANX11_HUMAN Annexin A11
P63208	SKP1	0.150662	1.65997	SKP1_HUMAN S-phase kinase-associated protein 1
P78347	GTF2I	0.143967	1.65785	GTF2I_HUMAN General transcription factor II-I
P35580	MYH10	0.0966073	1.65629	MYH10_HUMAN Myosin-10
Q9Y6A4	C16orf80	0.158675	1.65316	CP080_HUMAN UPF0468 protein C16orf80
Q9Y230	RUVBL2	0.332266	1.65174	RUVB2_HUMAN RuvB-like 2
Q8IY67	RAVER1	0.117804	1.65147	RAVR1_HUMAN Ribonucleoprotein PTB-binding 1
P61326	MAGOH	0.310803	1.65038	MGN_HUMAN Protein mago nashi homolog
O94805	ACTL6B	0.522437	1.64951	ACL6B_HUMAN Actin-like protein 6B
Q9HCU5	PREB	0.250933	1.64609	PREB_HUMAN Prolactin regulatory element-binding protein
Q13619	CUL4A	0.0728702	1.64488	CUL4A_HUMAN Cullin-4A
P20674	COX5A	0.116879	1.64487	COX5A_HUMAN Cytochrome c oxidase subunit 5A, mitochondrial
Q5M775	SPECC1	0.0782474	1.6443	CYTSB_HUMAN Cytospin-B
P55036	PSMD4	0.0733162	1.64136	PSMD4_HUMAN 26S proteasome non-ATPase regulatory subunit 4
Q5T9A4	ATAD3B	0.197878	1.641	ATD3B_HUMAN ATPase family AAA domain-containing protein 3B
Q9UH99	SUN2	0.158932	1.64053	SUN2_HUMAN SUN domain-containing protein 2
P61964	WDR5	0.278507	1.63949	WDR5_HUMAN WD repeat-containing protein 5
Q13347	EIF3I	0.121446	1.63919	EIF3I_HUMAN Eukaryotic translation initiation factor 3 subunit I
Q5T8P6	RBM26	0.0769095	1.63879	RBM26_HUMAN RNA-binding protein 26
Q06481	APLP2	0.060601	1.63831	APLP2_HUMAN Amyloid-like protein 2
O75477	ERLIN1	0.244147	1.6377	ERLN1_HUMAN Erlin-1
P18031	PTPN1	0.134306	1.63651	PTN1_HUMAN Tyrosine-protein phosphatase non-receptor type 1
Q10567	AP1B1	0.0737106	1.63344	AP1B1_HUMAN AP-1 complex subunit beta-1
Q00341	HDLBP	0.0899891	1.63293	VIGLN_HUMAN Vigilin
P69849	NOMO3	0.192818	1.6262	NOMO3_HUMAN Nodal modulator 3
O60216	RAD21	0.169271	1.62588	RAD21_HUMAN Double-strand-break repair protein rad21 homolog
Q14165	MLEC	0.282193	1.62568	MLEC_HUMAN Malectin
O43432	EIF4G3	0.0790679	1.6233	IF4G3_HUMAN Eukaryotic translation initiation factor 4 gamma 3
O14776	TCERG1	0.20753	1.62174	TCRG1_HUMAN Transcription elongation regulator 1
P41091	EIF2S3	0.185338	1.62098	IF2G_HUMAN Eukaryotic translation initiation factor 2 subunit 3
P0C7P4	UQCRFS1P1	0.0751848	1.61938	UCRIL_HUMAN Putative cytochrome b-c1 complex subunit Rieske-like protein 1
O75340	PDCD6	0.231343	1.61759	PDCD6_HUMAN Programmed cell death protein 6
Q14203	DCTN1	0.0591861	1.61745	DCTN1_HUMAN Dynactin subunit 1
Q92945	KHSRP	0.122631	1.61603	FUBP2_HUMAN Far upstream element-binding protein 2
P46060	RANGAP1	0.249639	1.61409	RAGP1_HUMAN Ran GTPase-activating protein 1
Q9UHD8	43717	0.227751	1.61343	SEPT9_HUMAN Septin-9
Q9UI30	TRMT112	0.0571676	1.60917	TR112_HUMAN tRNA methyltransferase 112 homolog
Q9NWB6	ARGLU1	0.359301	1.60852	ARGL1_HUMAN Arginine and glutamate-rich protein 1
O95817	BAG3	0.102237	1.60589	BAG3_HUMAN BAG family molecular chaperone regulator 3
Q9Y4B6	VPRBP	0.187728	1.60359	VPRBP_HUMAN Protein VPRBP
Q7Z7H5	TMED4	0.0935212	1.60341	TMED4_HUMAN Transmembrane emp24 domain-containing protein 4
O60293	ZFC3H1	0.149527	1.60337	ZC3H1_HUMAN Zinc finger C3H1 domain-containing protein
P62314	SNRPD1	0.468818	1.60176	SMD1_HUMAN Small nuclear ribonucleoprotein Sm D1
Q05048	CSTF1	0.214682	1.60046	CSTF1_HUMAN Cleavage stimulation factor subunit 1
Q9Y4L1	HYOU1	0.168124	1.59972	HYOU1_HUMAN Hypoxia up-regulated protein 1
Q99460	PSMD1	0.0592052	1.59852	PSMD1_HUMAN 26S proteasome non-ATPase regulatory subunit 1
O75531	BANF1	0.327918	1.58798	BAF_HUMAN Barrier-to-autointegration factor
O60762	DPM1	0.315633	1.58757	DPM1_HUMAN Dolichol-phosphate mannosyltransferase
P55072	VCP	0.287023	1.58722	TERA_HUMAN Transitional endoplasmic reticulum ATPase
Q96HP0	DOCK6	0.061173	1.58714	DOCK6_HUMAN Dedicator of cytokinesis protein 6
P62333	PSMC6	0.0946455	1.58539	PRS10_HUMAN 26S protease regulatory subunit 10B
P68431	HIST1H3A	0.211379	1.58394	H31_HUMAN Histone H3.1
Q96LA8	PRMT6	0.114115	1.5836	ANM6_HUMAN Protein arginine N-methyltransferase 6
O95758	PTBP3	0.143043	1.58326	PTBP3_HUMAN Polypyrimidine tract-binding protein 3
P31930	UQCRC1	0.110513	1.58112	QCR1_HUMAN Cytochrome b-c1 complex subunit 1, mitochondrial
Q15637	SF1	0.248761	1.57625	SF01_HUMAN Splicing factor 1
P33176	KIF5B	0.123959	1.57212	KINH_HUMAN Kinesin-1 heavy chain
P16402	HIST1H1D	0.167367	1.56908	H13_HUMAN Histone H1.3
Q9BZJ0	CRNKL1	0.163425	1.56497	CRNL1_HUMAN Crooked neck-like protein 1
Q6UXN9	WDR82	0.351821	1.56349	WDR82_HUMAN WD repeat-containing protein 82
P56545	CTBP2	0.0637632	1.56195	CTBP2_HUMAN C-terminal-binding protein 2
P08574	CYC1	0.153217	1.56131	CY1_HUMAN Cytochrome c1, heme protein, mitochondrial
P25685	DNAJB1	0.0631364	1.55988	DNJB1_HUMAN DnaJ homolog subfamily B member 1
Q15555	MAPRE2	0.20338	1.55782	MARE2_HUMAN Microtubule-associated protein RP/EB family member 2
P51648	ALDH3A2	0.154006	1.55778	AL3A2_HUMAN Fatty aldehyde dehydrogenase
Q9Y5S9	RBM8A	0.375252	1.55741	RBM8A_HUMAN RNA-binding protein 8A
P49585	PCYT1A	0.151865	1.55646	PCY1A_HUMAN Choline-phosphate cytidylyltransferase A
P78344	EIF4G2	0.0503234	1.55421	IF4G2_HUMAN Eukaryotic translation initiation factor 4 gamma 2
Q5W0Z9	ZDHHC20	0.126063	1.55405	ZDH20_HUMAN Probable palmitoyltransferase ZDHHC20
Q14571	ITPR2	0.0575758	1.5516	ITPR2_HUMAN Inositol 1,4,5-trisphosphate receptor type 2
Q99615	DNAJC7	0.102602	1.54683	DNJC7_HUMAN DnaJ homolog subfamily C member 7
O75396	SEC22B	0.26051	1.54651	SC22B_HUMAN Vesicle-trafficking protein SEC22b
O43172	PRPF4	0.517734	1.54625	PRP4_HUMAN U4/U6 small nuclear ribonucleoprotein Prp4
Q9ULZ3	PYCARD	0.0536476	1.54455	ASC_HUMAN Apoptosis-associated speck-like protein containing a CARD
P54920	NAPA	0.115878	1.54165	SNAA_HUMAN Alpha-soluble NSF attachment protein
Q9BXS6	NUSAP1	0.14774	1.54163	NUSAP_HUMAN Nucleolar and spindle-associated protein 1
Q5JS37	NHLRC3	0.0871345	1.5404	NHLC3_HUMAN NHL repeat-containing protein 3
Q07960	ARHGAP1	0.0552892	1.53677	RHG01_HUMAN Rho GTPase-activating protein 1
P27816	MAP4	0.271976	1.53629	MAP4_HUMAN Microtubule-associated protein 4
O00139	KIF2A	0.22734	1.53577	KIF2A_HUMAN Kinesin-like protein KIF2A
Q92499	DDX1	0.23004	1.53516	DDX1_HUMAN ATP-dependent RNA helicase DDX1
Q99567	NUP88	0.33299	1.53516	NUP88_HUMAN Nuclear pore complex protein Nup88
Q99808	SLC29A1	0.0737191	1.53441	S29A1_HUMAN Equilibrative nucleoside transporter 1
Q92544	TM9SF4	0.061166	1.53439	TM9S4_HUMAN Transmembrane 9 superfamily member 4
Q12769	NUP160	0.199016	1.53158	NU160_HUMAN Nuclear pore complex protein Nup160
Q8IZ83	ALDH16A1	0.0876759	1.53036	A16A1_HUMAN Aldehyde dehydrogenase family 16 member A1
Q9UJ68	MSRA	0.157472	1.52958	MSRA_HUMAN Mitochondrial peptide methionine sulfoxide reductase
Q8N163	CCAR2	0.228242	1.52638	CCAR2_HUMAN Cell cycle and apoptosis regulator protein 2
O43491	EPB41L2	0.0588884	1.52451	E41L2_HUMAN Band 4.1-like protein 2
Q9H6T0	ESRP2	0.079026	1.5244	ESRP2_HUMAN Epithelial splicing regulatory protein 2
F8WDG7	PTK7	0.070881	1.52189	F8WDG7_HUMAN Inactive tyrosine-protein kinase 7
Q9NWV8	BABAM1	0.248023	1.52133	BABA1_HUMAN BRISC and BRCA1-A complex member 1
P11177	PDHB	0.0765861	1.51801	ODPB_HUMAN Pyruvate dehydrogenase E1 component subunit beta, mitochondrial
Q9Y6I9	TEX264	0.366613	1.51784	TX264_HUMAN Testis-expressed sequence 264 protein
P11216	PYGB	0.07358	1.51724	PYGB_HUMAN Glycogen phosphorylase, brain form
Q96RQ3	MCCC1	0.0674264	1.51646	MCCA_HUMAN Methylcrotonoyl-CoA carboxylase subunit alpha, mitochondrial
Q9NRF8	CTPS2	0.183892	1.51621	PYRG2_HUMAN CTP synthase 2
Q92466	DDB2	0.054002	1.51562	DDB2_HUMAN DNA damage-binding protein 2
P22090	RPS4Y1	0.161479	1.51389	RS4Y1_HUMAN 40S ribosomal protein S4, Y isoform 1
Q9Y265	RUVBL1	0.273949	1.51288	RUVB1_HUMAN RuvB-like 1
O43765	SGTA	0.363031	1.50534	SGTA_HUMAN Small glutamine-rich tetratricopeptide repeat-containing protein alpha
O60244	MED14	0.0564937	1.50466	MED14_HUMAN Mediator of RNA polymerase II transcription subunit 14
Q9Y6M5	SLC30A1	0.0533998	1.50429	ZNT1_HUMAN Zinc transporter 1
Q9Y3C8	UFC1	0.135443	1.50426	UFC1_HUMAN Ubiquitin-fold modifier-conjugating enzyme 1
P43304	GPD2	0.120422	1.5026	GPDM_HUMAN Glycerol-3-phosphate dehydrogenase, mitochondrial
A0FGR8	ESYT2	0.100835	1.50209	ESYT2_HUMAN Extended synaptotagmin-2
Q8IUH4	ZDHHC13	0.0586476	1.50177	ZDH13_HUMAN Palmitoyltransferase ZDHHC13
P20700	LMNB1	0.518172	1.49935	LMNB1_HUMAN Lamin-B1
Q96H55	MYO19	0.14921	1.4992	MYO19_HUMAN Unconventional myosin-XIX
P07900	HSP90AA1	0.242867	1.4965	HS90A_HUMAN Heat shock protein HSP 90-alpha
Q9BQ61	C19orf43	0.343553	1.49549	CS043_HUMAN Uncharacterized protein C19orf43
P04350	TUBB4A	0.155436	1.49529	TBB4A_HUMAN Tubulin beta-4A chain
O15243	LEPROT	0.0502146	1.49405	OBRG_HUMAN Leptin receptor gene-related protein
O00410	IPO5	0.0585491	1.49378	IPO5_HUMAN Importin-5
P07996	THBS1	0.097672	1.4917	TSP1_HUMAN Thrombospondin-1
O14602	EIF1AY	0.125864	1.49075	IF1AY_HUMAN Eukaryotic translation initiation factor 1A, Y-chromosomal
Q9Y314	NOSIP	0.0620526	1.49068	NOSIP_HUMAN Nitric oxide synthase-interacting protein
P48739	PITPNB	0.0618429	1.49013	PIPNB_HUMAN Phosphatidylinositol transfer protein beta isoform
Q86XP3	DDX42	0.330043	1.48988	DDX42_HUMAN ATP-dependent RNA helicase DDX42
Q15366	PCBP2	0.126875	1.4895	PCBP2_HUMAN Poly(rC)-binding protein 2
Q96RL7	VPS13A	0.0631713	1.48809	VP13A_HUMAN Vacuolar protein sorting-associated protein 13A
Q9UNE7	STUB1	0.190542	1.48577	CHIP_HUMAN E3 ubiquitin-protein ligase CHIP
P62269	RPS18	0.0955278	1.48478	RS18_HUMAN 40S ribosomal protein S18
Q9NYL9	TMOD3	0.20512	1.48299	TMOD3_HUMAN Tropomodulin-3
Q14573	ITPR3	0.0572018	1.48106	ITPR3_HUMAN Inositol 1,4,5-trisphosphate receptor type 3
P26583	HMGB2	0.214703	1.47892	HMGB2_HUMAN High mobility group protein B2
O14974	PPP1R12A	0.453187	1.47691	MYPT1_HUMAN Protein phosphatase 1 regulatory subunit 12A
P27824	CANX	0.441195	1.47688	CALX_HUMAN Calnexin
O94919	ENDOD1	0.0511411	1.47476	ENDD1_HUMAN Endonuclease domain-containing 1 protein
Q9NSE4	IARS2	0.0700422	1.47399	SYIM_HUMAN Isoleucine--tRNA ligase, mitochondrial
Q02952	AKAP12	0.0971136	1.47397	AKA12_HUMAN A-kinase anchor protein 12
Q8WXH0	SYNE2	0.0660298	1.47347	SYNE2_HUMAN Nesprin-2
P52701	MSH6	0.0547949	1.47311	MSH6_HUMAN DNA mismatch repair protein Msh6
Q01469	FABP5	0.172018	1.4723	FABP5_HUMAN Fatty acid-binding protein, epidermal
Q9Y653	GPR56	0.0993116	1.4718	GPR56_HUMAN G-protein coupled receptor 56
O43684	BUB3	0.284867	1.47075	BUB3_HUMAN Mitotic checkpoint protein BUB3
O60330	PCDHGA12	0.0900098	1.46884	PCDGC_HUMAN Protocadherin gamma-A12
P07237	P4HB	0.0579669	1.46845	PDIA1_HUMAN Protein disulfide-isomerase
P04040	CAT	0.115847	1.46775	CATA_HUMAN Catalase
O14975	SLC27A2	0.0940914	1.46602	S27A2_HUMAN Very long-chain acyl-CoA synthetase
A6NHR9	SMCHD1	0.0518036	1.46548	SMHD1_HUMAN Structural maintenance of chromosomes flexible hinge domain-containing protein 1
O75027	ABCB7	0.105499	1.46467	ABCB7_HUMAN ATP-binding cassette sub-family B member 7, mitochondrial
Q93084	ATP2A3	0.0956137	1.46433	AT2A3_HUMAN Sarcoplasmic/endoplasmic reticulum calcium ATPase 3
O43395	PRPF3	0.14141	1.46411	PRPF3_HUMAN U4/U6 small nuclear ribonucleoprotein Prp3
Q13275	SEMA3F	0.161864	1.46391	SEM3F_HUMAN Semaphorin-3F
Q8NI27	THOC2	0.196729	1.46341	THOC2_HUMAN THO complex subunit 2
P35070	BTC	0.0694337	1.4631	BTC_HUMAN Probetacellulin
Q96QD8	SLC38A2	0.0607883	1.46304	S38A2_HUMAN Sodium-coupled neutral amino acid transporter 2
Q9BVX2	TMEM106C	0.0822091	1.46144	T106C_HUMAN Transmembrane protein 106C
Q07666	KHDRBS1	0.298314	1.4613	KHDR1_HUMAN KH domain-containing, RNA-binding, signal transduction-associated protein 1
Q92552	MRPS27	0.189853	1.46119	RT27_HUMAN 28S ribosomal protein S27, mitochondrial
Q14683	SMC1A	0.237463	1.46039	SMC1A_HUMAN Structural maintenance of chromosomes protein 1A
Q86YD3	TMEM25	0.160811	1.45985	TMM25_HUMAN Transmembrane protein 25
P06454	PTMA	0.282067	1.45787	PTMA_HUMAN Prothymosin alpha
O95049	TJP3	0.21503	1.45732	ZO3_HUMAN Tight junction protein ZO-3
O75153	CLUH	0.0876133	1.45684	CLU_HUMAN Clustered mitochondria protein homolog
P19525	EIF2AK2	0.0805119	1.45433	E2AK2_HUMAN Interferon-induced, double-stranded RNA-activated protein kinase
O95602	POLR1A	0.125714	1.45361	RPA1_HUMAN DNA-directed RNA polymerase I subunit RPA1
Q03252	LMNB2	0.594918	1.45312	LMNB2_HUMAN Lamin-B2
O15144	ARPC2	0.0830979	1.45282	ARPC2_HUMAN Actin-related protein 2/3 complex subunit 2
Q96RS6	NUDCD1	0.0740901	1.45226	NUDC1_HUMAN NudC domain-containing protein 1
P14174	MIF	0.0857097	1.44836	MIF_HUMAN Macrophage migration inhibitory factor
Q9BSJ8	ESYT1	0.122724	1.4481	ESYT1_HUMAN Extended synaptotagmin-1
P16298	PPP3CB	0.0807495	1.44657	PP2BB_HUMAN Serine/threonine-protein phosphatase 2B catalytic subunit beta isoform
O00400	SLC33A1	0.0794859	1.44511	ACATN_HUMAN Acetyl-coenzyme A transporter 1
P61011	SRP54	0.0952182	1.44485	SRP54_HUMAN Signal recognition particle 54 kDa protein
P22695	UQCRC2	0.0977237	1.44432	QCR2_HUMAN Cytochrome b-c1 complex subunit 2, mitochondrial
Q8N6S5	ARL6IP6	0.115282	1.44398	AR6P6_HUMAN ADP-ribosylation factor-like protein 6-interacting protein 6
Q5VT52	RPRD2	0.36459	1.44302	RPRD2_HUMAN Regulation of nuclear pre-mRNA domain-containing protein 2
O75828	CBR3	0.1321	1.4424	CBR3_HUMAN Carbonyl reductase [NADPH] 3
P25929	NPY1R	0.0596321	1.44178	NPY1R_HUMAN Neuropeptide Y receptor type 1
Q06830	PRDX1	0.052942	1.44135	PRDX1_HUMAN Peroxiredoxin-1
Q9H0C8	ILKAP	0.106203	1.43943	ILKAP_HUMAN Integrin-linked kinase-associated serine/threonine phosphatase 2C
Q15717	ELAVL1	0.440077	1.43807	ELAV1_HUMAN ELAV-like protein 1
Q6P6C2	ALKBH5	0.0622702	1.43692	ALKB5_HUMAN RNA demethylase ALKBH5
O95433	AHSA1	0.1175	1.43616	AHSA1_HUMAN Activator of 90 kDa heat shock protein ATPase homolog 1
P50416	CPT1A	0.130178	1.43475	CPT1A_HUMAN Carnitine O-palmitoyltransferase 1, liver isoform
P09429	HMGB1	0.490864	1.43245	HMGB1_HUMAN High mobility group protein B1
P06730	EIF4E	0.0808277	1.43182	IF4E_HUMAN Eukaryotic translation initiation factor 4E
Q96HY7	DHTKD1	0.108166	1.4317	DHTK1_HUMAN Probable 2-oxoglutarate dehydrogenase E1 component DHKTD1, mitochondrial
P22059	OSBP	0.0610759	1.43135	OSBP1_HUMAN Oxysterol-binding protein 1
O14828	SCAMP3	0.0595498	1.43051	SCAM3_HUMAN Secretory carrier-associated membrane protein 3
O75534	CSDE1	0.104606	1.42928	CSDE1_HUMAN Cold shock domain-containing protein E1
Q99797	MIPEP	0.125147	1.42752	MIPEP_HUMAN Mitochondrial intermediate peptidase
Q8TEM1	NUP210	0.232252	1.42744	PO210_HUMAN Nuclear pore membrane glycoprotein 210
Q8IWA5	SLC44A2	0.103422	1.42738	CTL2_HUMAN Choline transporter-like protein 2
B5ME19	EIF3CL	0.0526611	1.42737	EIFCL_HUMAN Eukaryotic translation initiation factor 3 subunit C-like protein
P05388	RPLP0	0.363701	1.42645	RLA0_HUMAN 60S acidic ribosomal protein P0
P12956	XRCC6	0.16277	1.42629	XRCC6_HUMAN X-ray repair cross-complementing protein 6
Q8IX12	CCAR1	0.348205	1.42526	CCAR1_HUMAN Cell division cycle and apoptosis regulator protein 1
P11940	PABPC1	0.315216	1.42443	PABP1_HUMAN Polyadenylate-binding protein 1
Q13591	SEMA5A	0.051415	1.42437	SEM5A_HUMAN Semaphorin-5A
Q13190	STX5	0.19713	1.42379	STX5_HUMAN Syntaxin-5
P53801	PTTG1IP	0.109374	1.42297	PTTG_HUMAN Pituitary tumor-transforming gene 1 protein-interacting protein
Q9C0J8	WDR33	0.472725	1.42145	WDR33_HUMAN pre-mRNA 3' end processing protein WDR33
Q15046	KARS	0.225746	1.4209	SYK_HUMAN Lysine--tRNA ligase
P42285	SKIV2L2	0.0919136	1.42059	SK2L2_HUMAN Superkiller viralicidic activity 2-like 2
Q9NVA2	43719	0.244775	1.4184	SEP11_HUMAN Septin-11
O95319	CELF2	0.30464	1.41811	CELF2_HUMAN CUGBP Elav-like family member 2
Q14258	TRIM25	0.0804285	1.41752	TRI25_HUMAN E3 ubiquitin/ISG15 ligase TRIM25
Q9H845	ACAD9	0.0654018	1.41591	ACAD9_HUMAN Acyl-CoA dehydrogenase family member 9, mitochondrial
Q8IXT5	RBM12B	0.396353	1.41562	RB12B_HUMAN RNA-binding protein 12B
P63244	GNB2L1	0.275099	1.41373	GBLP_HUMAN Guanine nucleotide-binding protein subunit beta-2-like 1
P26599	PTBP1	0.172234	1.4134	PTBP1_HUMAN Polypyrimidine tract-binding protein 1
Q9ULX6	AKAP8L	0.469145	1.41217	AKP8L_HUMAN A-kinase anchor protein 8-like
Q8N766	EMC1	0.145379	1.41215	EMC1_HUMAN ER membrane protein complex subunit 1
Q07065	CKAP4	0.268153	1.41191	CKAP4_HUMAN Cytoskeleton-associated protein 4
Q96EU6	RRP36	0.0724486	1.41081	RRP36_HUMAN Ribosomal RNA processing protein 36 homolog
P62191	PSMC1	0.10323	1.41041	PRS4_HUMAN 26S protease regulatory subunit 4
P40763	STAT3	0.0548075	1.40784	STAT3_HUMAN Signal transducer and activator of transcription 3
P26378	ELAVL4	0.620895	1.40684	ELAV4_HUMAN ELAV-like protein 4
O94903	PROSC	0.0893635	1.40599	PROSC_HUMAN Proline synthase co-transcribed bacterial homolog protein
P55058	PLTP	0.0917825	1.40476	PLTP_HUMAN Phospholipid transfer protein
Q9UL03	INTS6	0.19209	1.4044	INT6_HUMAN Integrator complex subunit 6
P62140	PPP1CB	0.108998	1.40426	PP1B_HUMAN Serine/threonine-protein phosphatase PP1-beta catalytic subunit
P57678	GEMIN4	0.0556878	1.40346	GEMI4_HUMAN Gem-associated protein 4
P83881	RPL36A	0.0626874	1.40296	RL36A_HUMAN 60S ribosomal protein L36a
P55795	HNRNPH2	0.291538	1.40059	HNRH2_HUMAN Heterogeneous nuclear ribonucleoprotein H2
P43246	MSH2	0.17982	1.40021	MSH2_HUMAN DNA mismatch repair protein Msh2
Q8NCG7	DAGLB	0.131007	1.39966	DGLB_HUMAN Sn1-specific diacylglycerol lipase beta
P39019	RPS19	0.471001	1.39964	RS19_HUMAN 40S ribosomal protein S19
P08579	SNRPB2	0.471891	1.39959	RU2B_HUMAN U2 small nuclear ribonucleoprotein B''
O76094	SRP72	0.0674932	1.39856	SRP72_HUMAN Signal recognition particle subunit SRP72
Q9UEW8	STK39	0.183317	1.39856	STK39_HUMAN STE20/SPS1-related proline-alanine-rich protein kinase
O75311	GLRA3	0.054459	1.39792	GLRA3_HUMAN Glycine receptor subunit alpha-3
P30084	ECHS1	0.108534	1.39611	ECHM_HUMAN Enoyl-CoA hydratase, mitochondrial
Q96EP5	DAZAP1	0.226177	1.39577	DAZP1_HUMAN DAZ-associated protein 1
Q96I24	FUBP3	0.388896	1.39422	FUBP3_HUMAN Far upstream element-binding protein 3
Q14232	EIF2B1	0.06498	1.39402	EI2BA_HUMAN Translation initiation factor eIF-2B subunit alpha
O14983	ATP2A1	0.137911	1.39388	AT2A1_HUMAN Sarcoplasmic/endoplasmic reticulum calcium ATPase 1
P09497	CLTB	0.150582	1.39359	CLCB_HUMAN Clathrin light chain B
P55263	ADK	0.0610548	1.39238	ADK_HUMAN Adenosine kinase
P51610	HCFC1	0.245023	1.39132	HCFC1_HUMAN Host cell factor 1
P63151	PPP2R2A	0.104285	1.3912	2ABA_HUMAN Serine/threonine-protein phosphatase 2A 55 kDa regulatory subunit B alpha isoform
Q13724	MOGS	0.143007	1.39062	MOGS_HUMAN Mannosyl-oligosaccharide glucosidase
P16435	POR	0.398418	1.39036	NCPR_HUMAN NADPH--cytochrome P450 reductase
Q9H7Z7	PTGES2	0.0771845	1.39	PGES2_HUMAN Prostaglandin E synthase 2
P62750	RPL23A	0.417938	1.3896	RL23A_HUMAN 60S ribosomal protein L23a
Q9H078	CLPB	0.305476	1.38925	CLPB_HUMAN Caseinolytic peptidase B protein homolog
P22307	SCP2	0.294153	1.38913	NLTP_HUMAN Non-specific lipid-transfer protein
Q4G0J3	LARP7	0.351098	1.38815	LARP7_HUMAN La-related protein 7
P31040	SDHA	0.128879	1.38708	DHSA_HUMAN Succinate dehydrogenase [ubiquinone] flavoprotein subunit, mitochondrial
Q96CN7	ISOC1	0.0699214	1.38661	ISOC1_HUMAN Isochorismatase domain-containing protein 1
P30038	ALDH4A1	0.096434	1.38644	AL4A1_HUMAN Delta-1-pyrroline-5-carboxylate dehydrogenase, mitochondrial
Q9BRF8	CPPED1	0.190091	1.38539	CPPED_HUMAN Calcineurin-like phosphoesterase domain-containing protein 1
Q9UBU9	NXF1	0.282216	1.38527	NXF1_HUMAN Nuclear RNA export factor 1
O60664	PLIN3	0.0702296	1.38491	PLIN3_HUMAN Perilipin-3
P07737	PFN1	0.0615375	1.38486	PROF1_HUMAN Profilin-1
P62158	CALM1	0.176555	1.38371	CALM_HUMAN Calmodulin
O15397	IPO8	0.0776569	1.38369	IPO8_HUMAN Importin-8
P67812	SEC11A	0.180102	1.38314	SC11A_HUMAN Signal peptidase complex catalytic subunit SEC11A
P62277	RPS13	0.257362	1.38202	RS13_HUMAN 40S ribosomal protein S13
O95340	PAPSS2	0.146441	1.38144	PAPS2_HUMAN Bifunctional 3'-phosphoadenosine 5'-phosphosulfate synthase 2
Q8IVT2	MISP	0.140424	1.38062	MISP_HUMAN Mitotic interactor and substrate of PLK1
P84090	ERH	0.420852	1.38047	ERH_HUMAN Enhancer of rudimentary homolog
Q7L5L3	GDPD3	0.0658582	1.38029	GDPD3_HUMAN Glycerophosphodiester phosphodiesterase domain-containing protein 3
Q86TM6	SYVN1	0.106458	1.37937	SYVN1_HUMAN E3 ubiquitin-protein ligase synoviolin
Q9Y5Q9	GTF3C3	0.265059	1.37778	TF3C3_HUMAN General transcription factor 3C polypeptide 3
P00403	MT-CO2	0.0927855	1.37694	COX2_HUMAN Cytochrome c oxidase subunit 2
Q92598	HSPH1	0.061927	1.37681	HS105_HUMAN Heat shock protein 105 kDa
O60306	AQR	0.0537415	1.37656	AQR_HUMAN Intron-binding protein aquarius
Q9UPN3	MACF1	0.0533605	1.37554	MACF1_HUMAN Microtubule-actin cross-linking factor 1, isoforms 1/2/3/5
Q8WXA9	SREK1	0.171124	1.3752	SREK1_HUMAN Splicing regulatory glutamine/lysine-rich protein 1
Q16851	UGP2	0.140961	1.37427	UGPA_HUMAN UTP--glucose-1-phosphate uridylyltransferase
Q9BTV4	TMEM43	0.218882	1.37409	TMM43_HUMAN Transmembrane protein 43
Q9HCM3	KIAA1549	0.0650055	1.37348	K1549_HUMAN UPF0606 protein KIAA1549
Q8N1F7	NUP93	0.103597	1.37013	NUP93_HUMAN Nuclear pore complex protein Nup93
O00757	FBP2	0.19415	1.3688	F16P2_HUMAN Fructose-1,6-bisphosphatase isozyme 2
P49736	MCM2	0.440839	1.36839	MCM2_HUMAN DNA replication licensing factor MCM2
Q07157	TJP1	0.248417	1.36732	ZO1_HUMAN Tight junction protein ZO-1
Q86UN2	RTN4RL1	0.096485	1.36724	R4RL1_HUMAN Reticulon-4 receptor-like 1
P52943	CRIP2	0.0846584	1.36664	CRIP2_HUMAN Cysteine-rich protein 2
Q13501	SQSTM1	0.0996254	1.36311	SQSTM_HUMAN Sequestosome-1
P13010	XRCC5	0.05098	1.36266	XRCC5_HUMAN X-ray repair cross-complementing protein 5
P25786	PSMA1	0.225372	1.36238	PSA1_HUMAN Proteasome subunit alpha type-1
P33897	ABCD1	0.109294	1.3619	ABCD1_HUMAN ATP-binding cassette sub-family D member 1
P31949	S100A11	0.0827523	1.36111	S10AB_HUMAN Protein S100-A11
Q9HDC9	APMAP	0.310209	1.36051	APMAP_HUMAN Adipocyte plasma membrane-associated protein
Q9BRX8	FAM213A	0.380238	1.35991	F213A_HUMAN Redox-regulatory protein FAM213A
P16220	CREB1	0.223812	1.35973	CREB1_HUMAN Cyclic AMP-responsive element-binding protein 1
Q6ZRV2	FAM83H	0.0713001	1.35933	FA83H_HUMAN Protein FAM83H
P46087	NOP2	0.120876	1.3581	NOP2_HUMAN Putative ribosomal RNA methyltransferase NOP2
Q53GS9	USP39	0.224338	1.35788	SNUT2_HUMAN U4/U6.U5 tri-snRNP-associated protein 2
Q08J23	NSUN2	0.17364	1.3577	NSUN2_HUMAN tRNA (cytosine(34)-C(5))-methyltransferase
P52907	CAPZA1	0.342145	1.35721	CAZA1_HUMAN F-actin-capping protein subunit alpha-1
P18583	SON	0.274123	1.35695	SON_HUMAN Protein SON
P06493	CDK1	0.299962	1.35606	CDK1_HUMAN Cyclin-dependent kinase 1
P31948	STIP1	0.105995	1.35547	STIP1_HUMAN Stress-induced-phosphoprotein 1
Q8NI32	LYPD6B	0.125848	1.3548	LPD6B_HUMAN Ly6/PLAUR domain-containing protein 6B
P63167	DYNLL1	0.174569	1.3539	DYL1_HUMAN Dynein light chain 1, cytoplasmic
Q9Y295	DRG1	0.108278	1.35336	DRG1_HUMAN Developmentally-regulated GTP-binding protein 1
P55011	SLC12A2	0.050262	1.35314	S12A2_HUMAN Solute carrier family 12 member 2
P15144	ANPEP	0.214584	1.35299	AMPN_HUMAN Aminopeptidase N
Q9BQE5	APOL2	0.181472	1.35295	APOL2_HUMAN Apolipoprotein L2
O14735	CDIPT	0.152295	1.35283	CDIPT_HUMAN CDP-diacylglycerol--inositol 3-phosphatidyltransferase
Q15084	PDIA6	0.331884	1.35208	PDIA6_HUMAN Protein disulfide-isomerase A6
P42677	RPS27	0.273094	1.35131	RS27_HUMAN 40S ribosomal protein S27
P54886	ALDH18A1	0.0777231	1.35119	P5CS_HUMAN Delta-1-pyrroline-5-carboxylate synthase
Q4KMP7	TBC1D10B	0.109581	1.35069	TB10B_HUMAN TBC1 domain family member 10B
Q92804	TAF15	0.462694	1.35066	RBP56_HUMAN TATA-binding protein-associated factor 2N
Q10713	PMPCA	0.116425	1.35055	MPPA_HUMAN Mitochondrial-processing peptidase subunit alpha
Q9H6R0	DHX33	0.278607	1.35048	DHX33_HUMAN Putative ATP-dependent RNA helicase DHX33
P36873	PPP1CC	0.305002	1.34781	PP1G_HUMAN Serine/threonine-protein phosphatase PP1-gamma catalytic subunit
P31483	TIA1	0.195438	1.34764	TIA1_HUMAN Nucleolysin TIA-1 isoform p40
Q8TBX8	PIP4K2C	0.0998688	1.34681	PI42C_HUMAN Phosphatidylinositol 5-phosphate 4-kinase type-2 gamma
P46013	MKI67	0.0706415	1.34669	KI67_HUMAN Antigen KI-67
Q96K37	SLC35E1	0.067355	1.34661	S35E1_HUMAN Solute carrier family 35 member E1
O60341	KDM1A	0.430737	1.34643	KDM1A_HUMAN Lysine-specific histone demethylase 1A
Q9UIJ7	AK3	0.184023	1.34598	KAD3_HUMAN GTP:AMP phosphotransferase AK3, mitochondrial
P51790	CLCN3	0.0580684	1.34462	CLCN3_HUMAN H(+)/Cl(-) exchange transporter 3
P35080	PFN2	0.0705879	1.34445	PROF2_HUMAN Profilin-2
P30825	SLC7A1	0.0641062	1.3442	CTR1_HUMAN High affinity cationic amino acid transporter 1
Q01085	TIAL1	0.297618	1.34374	TIAR_HUMAN Nucleolysin TIAR
Q9UBQ0	VPS29	0.0600869	1.34215	VPS29_HUMAN Vacuolar protein sorting-associated protein 29
O43865	AHCYL1	0.130549	1.34187	SAHH2_HUMAN Putative adenosylhomocysteinase 2
Q8IYB3	SRRM1	0.155492	1.33914	SRRM1_HUMAN Serine/arginine repetitive matrix protein 1
P53992	SEC24C	0.113759	1.33804	SC24C_HUMAN Protein transport protein Sec24C
P62258	YWHAE	0.0928795	1.33774	1433E_HUMAN 14-3-3 protein epsilon
Q9NRU3	CNNM1	0.0744458	1.33743	CNNM1_HUMAN Metal transporter CNNM1
O43852	CALU	0.120929	1.33498	CALU_HUMAN Calumenin
Q96GQ5	C16orf58	0.192137	1.33494	CP058_HUMAN UPF0420 protein C16orf58
P30153	PPP2R1A	0.0942215	1.33473	2AAA_HUMAN Serine/threonine-protein phosphatase 2A 65 kDa regulatory subunit A alpha isoform
P13667	PDIA4	0.16597	1.33329	PDIA4_HUMAN Protein disulfide-isomerase A4
Q9BS91	SLC35A5	0.079506	1.33271	S35A5_HUMAN Probable UDP-sugar transporter protein SLC35A5
Q9Y3B4	SF3B14	0.503945	1.3327	PM14_HUMAN Pre-mRNA branch site protein p14
Q9HCC0	MCCC2	0.0611589	1.33224	MCCB_HUMAN Methylcrotonoyl-CoA carboxylase beta chain, mitochondrial
P62847	RPS24	0.215396	1.33199	RS24_HUMAN 40S ribosomal protein S24
Q12830	BPTF	0.132016	1.33169	BPTF_HUMAN Nucleosome-remodeling factor subunit BPTF
Q14839	CHD4	0.238739	1.3316	CHD4_HUMAN Chromodomain-helicase-DNA-binding protein 4
O15145	ARPC3	0.0816827	1.33046	ARPC3_HUMAN Actin-related protein 2/3 complex subunit 3
P52735	VAV2	0.0594101	1.33027	VAV2_HUMAN Guanine nucleotide exchange factor VAV2
Q9NQ29	LUC7L	0.0946935	1.32877	LUC7L_HUMAN Putative RNA-binding protein Luc7-like 1
O96005	CLPTM1	0.247572	1.3286	CLPT1_HUMAN Cleft lip and palate transmembrane protein 1
A2RRP1	NBAS	0.0780692	1.32717	NBAS_HUMAN Neuroblastoma-amplified sequence
Q09161	NCBP1	0.453482	1.32646	NCBP1_HUMAN Nuclear cap-binding protein subunit 1
Q9H1E3	NUCKS1	0.515039	1.32501	NUCKS_HUMAN Nuclear ubiquitous casein and cyclin-dependent kinase substrate 1
Q6NUQ4	TMEM214	0.0704401	1.32411	TM214_HUMAN Transmembrane protein 214
Q8N1G2	CMTR1	0.155655	1.32256	CMTR1_HUMAN Cap-specific mRNA (nucleoside-2'-O-)-methyltransferase 1
Q9Y2K7	KDM2A	0.0530408	1.32193	KDM2A_HUMAN Lysine-specific demethylase 2A
P57772	EEFSEC	0.1014	1.32166	SELB_HUMAN Selenocysteine-specific elongation factor
Q9TNN7	HLA-C	0.0582747	1.32108	1C05_HUMAN HLA class I histocompatibility antigen, Cw-5 alpha chain
Q13018	PLA2R1	0.161884	1.32108	PLA2R_HUMAN Secretory phospholipase A2 receptor
Q9H832	UBE2Z	0.0872087	1.32072	UBE2Z_HUMAN Ubiquitin-conjugating enzyme E2 Z
P32119	PRDX2	0.073731	1.32027	PRDX2_HUMAN Peroxiredoxin-2
P62906	RPL10A	0.199894	1.32024	RL10A_HUMAN 60S ribosomal protein L10a
Q04637	EIF4G1	0.0705651	1.32014	IF4G1_HUMAN Eukaryotic translation initiation factor 4 gamma 1
P33316	DUT	0.0828419	1.31982	DUT_HUMAN Deoxyuridine 5'-triphosphate nucleotidohydrolase, mitochondrial
O60701	UGDH	0.126497	1.31901	UGDH_HUMAN UDP-glucose 6-dehydrogenase
O95394	PGM3	0.0562613	1.3189	AGM1_HUMAN Phosphoacetylglucosamine mutase
Q8N4Q1	CHCHD4	0.218428	1.31758	MIA40_HUMAN Mitochondrial intermembrane space import and assembly protein 40
Q96I99	SUCLG2	0.140228	1.31743	SUCB2_HUMAN Succinyl-CoA ligase [GDP-forming] subunit beta, mitochondrial
Q9HB40	SCPEP1	0.136789	1.31664	RISC_HUMAN Retinoid-inducible serine carboxypeptidase
P16401	HIST1H1B	0.253581	1.31659	H15_HUMAN Histone H1.5
Q6PKG0	LARP1	0.249815	1.31631	LARP1_HUMAN La-related protein 1
P98172	EFNB1	0.0671738	1.3163	EFNB1_HUMAN Ephrin-B1
P13073	COX4I1	0.294383	1.3163	COX41_HUMAN Cytochrome c oxidase subunit 4 isoform 1, mitochondrial
Q02218	OGDH	0.0558509	1.31604	ODO1_HUMAN 2-oxoglutarate dehydrogenase, mitochondrial
P09622	DLD	0.119479	1.31585	DLDH_HUMAN Dihydrolipoyl dehydrogenase, mitochondrial
Q9BRT6	LLPH	0.108835	1.31525	LLPH_HUMAN Protein LLP homolog
Q9UBF2	COPG2	0.114912	1.31427	COPG2_HUMAN Coatomer subunit gamma-2
Q9NYU2	UGGT1	0.051929	1.31384	UGGG1_HUMAN UDP-glucose:glycoprotein glucosyltransferase 1
Q9BXJ9	NAA15	0.0929587	1.31171	NAA15_HUMAN N-alpha-acetyltransferase 15, NatA auxiliary subunit
Q5BKU6	0	0.0668067	1.31165	YP026_HUMAN Putative uncharacterized protein LOC641298
Q92979	EMG1	0.217908	1.31143	NEP1_HUMAN Ribosomal RNA small subunit methyltransferase NEP1
O95833	CLIC3	0.124421	1.31079	CLIC3_HUMAN Chloride intracellular channel protein 3
Q9UQB8	BAIAP2	0.169355	1.30975	BAIP2_HUMAN Brain-specific angiogenesis inhibitor 1-associated protein 2
B2RPK0	HMGB1P1	0.51849	1.30904	HGB1A_HUMAN Putative high mobility group protein B1-like 1
Q7Z417	NUFIP2	0.218798	1.30853	NUFP2_HUMAN Nuclear fragile X mental retardation-interacting protein 2
O76041	NEBL	0.236981	1.30805	NEBL_HUMAN Isoform 2 of Nebulette
O00571	DDX3X	0.346786	1.30778	DDX3X_HUMAN ATP-dependent RNA helicase DDX3X
Q16775	HAGH	0.393957	1.30757	GLO2_HUMAN Hydroxyacylglutathione hydrolase, mitochondrial
A6NKZ8	0	0.0681208	1.30731	YI016_HUMAN Putative tubulin beta chain-like protein ENSP00000290377
O15347	HMGB3	0.124788	1.30632	HMGB3_HUMAN High mobility group protein B3
P48444	ARCN1	0.183581	1.30607	COPD_HUMAN Coatomer subunit delta
Q99714	HSD17B10	0.0796288	1.30493	HCD2_HUMAN 3-hydroxyacyl-CoA dehydrogenase type-2
Q9HA77	CARS2	0.162384	1.30469	SYCM_HUMAN Probable cysteine--tRNA ligase, mitochondrial
P51793	CLCN4	0.051318	1.30446	CLCN4_HUMAN H(+)/Cl(-) exchange transporter 4
P11498	PC	0.56893	1.30443	PYC_HUMAN Pyruvate carboxylase, mitochondrial
P14635	CCNB1	0.0851746	1.30402	CCNB1_HUMAN G2/mitotic-specific cyclin-B1
Q6RW13	AGTRAP	0.134321	1.30322	ATRAP_HUMAN Type-1 angiotensin II receptor-associated protein
Q92797	SYMPK	0.396878	1.30288	SYMPK_HUMAN Symplekin
P04183	TK1	0.0975821	1.30283	KITH_HUMAN Thymidine kinase, cytosolic
P07305	H1F0	0.201074	1.30224	H10_HUMAN Histone H1.0
P48449	LSS	0.211956	1.30211	ERG7_HUMAN Lanosterol synthase
Q2NL82	TSR1	0.0602338	1.30204	TSR1_HUMAN Pre-rRNA-processing protein TSR1 homolog
Q9UKD2	MRTO4	0.226136	1.30185	MRT4_HUMAN mRNA turnover protein 4 homolog
Q92522	H1FX	0.245048	1.30148	H1X_HUMAN Histone H1x
F2Z2U4	TRRAP	0.0723469	1.30083	F2Z2U4_HUMAN Transformation/transcription domain-associated protein
Q9BV38	WDR18	0.322396	1.30062	WDR18_HUMAN WD repeat-containing protein 18
P62249	RPS16	0.405833	1.30017	RS16_HUMAN 40S ribosomal protein S16
Q709C8	VPS13C	0.0557943	1.29988	VP13C_HUMAN Vacuolar protein sorting-associated protein 13C
Q02978	SLC25A11	0.0586746	1.29934	M2OM_HUMAN Mitochondrial 2-oxoglutarate/malate carrier protein
Q9UMS4	PRPF19	0.379851	1.29865	PRP19_HUMAN Pre-mRNA-processing factor 19
Q9UGP8	SEC63	0.319889	1.29836	SEC63_HUMAN Translocation protein SEC63 homolog
Q8NF37	LPCAT1	0.119743	1.29822	PCAT1_HUMAN Lysophosphatidylcholine acyltransferase 1
P08559	PDHA1	0.132237	1.298	ODPA_HUMAN Pyruvate dehydrogenase E1 component subunit alpha, somatic form, mitochondrial
Q12866	MERTK	0.316708	1.29712	MERTK_HUMAN Tyrosine-protein kinase Mer
Q14974	KPNB1	0.128477	1.297	IMB1_HUMAN Importin subunit beta-1
Q9H1K1	ISCU	0.0716457	1.29637	ISCU_HUMAN Iron-sulfur cluster assembly enzyme ISCU, mitochondrial
Q6QHC5	DEGS2	0.11598	1.29539	DEGS2_HUMAN Sphingolipid delta(4)-desaturase/C4-hydroxylase DES2
Q0VDG4	SCRN3	0.188411	1.29478	SCRN3_HUMAN Secernin-3
Q15102	PAFAH1B3	0.0885544	1.29463	PA1B3_HUMAN Platelet-activating factor acetylhydrolase IB subunit gamma
Q6P2Q9	PRPF8	0.0938837	1.29441	PRP8_HUMAN Pre-mRNA-processing-splicing factor 8
P83731	RPL24	0.0555687	1.29375	RL24_HUMAN 60S ribosomal protein L24
Q8WW43	APH1B	0.167146	1.29253	APH1B_HUMAN Gamma-secretase subunit APH-1B
Q9Y394	DHRS7	0.0962986	1.29229	DHRS7_HUMAN Dehydrogenase/reductase SDR family member 7
P35408	PTGER4	0.256929	1.29176	PE2R4_HUMAN Prostaglandin E2 receptor EP4 subtype
Q9P2I0	CPSF2	0.500181	1.29126	CPSF2_HUMAN Cleavage and polyadenylation specificity factor subunit 2
Q9BX63	BRIP1	0.102703	1.2901	FANCJ_HUMAN Fanconi anemia group J protein
Q9P2X0	DPM3	0.371546	1.28988	DPM3_HUMAN Dolichol-phosphate mannosyltransferase subunit 3
P23771	GATA3	0.229472	1.2889	GATA3_HUMAN Trans-acting T-cell-specific transcription factor GATA-3
Q9NTK5	OLA1	0.116063	1.28829	OLA1_HUMAN Obg-like ATPase 1
Q9Y224	C14orf166	0.309539	1.28822	CN166_HUMAN UPF0568 protein C14orf166
P62633	CNBP	0.202311	1.28793	CNBP_HUMAN Cellular nucleic acid-binding protein
O00258	WRB	0.113193	1.28776	WRB_HUMAN Tail-anchored protein insertion receptor WRB
Q9BYC9	MRPL20	0.12221	1.28755	RM20_HUMAN 39S ribosomal protein L20, mitochondrial
Q8N201	INTS1	0.0744509	1.28642	INT1_HUMAN Integrator complex subunit 1
H0YK59	CD276	0.515042	1.28496	H0YK59_HUMAN CD276 antigen (Fragment)
Q99569	PKP4	0.285403	1.28449	PKP4_HUMAN Plakophilin-4
P11908	PRPS2	0.0587557	1.28386	PRPS2_HUMAN Ribose-phosphate pyrophosphokinase 2
O95573	ACSL3	0.156878	1.2836	ACSL3_HUMAN Long-chain-fatty-acid--CoA ligase 3
O43292	GPAA1	0.051127	1.28326	GPAA1_HUMAN Glycosylphosphatidylinositol anchor attachment 1 protein
P38117	ETFB	0.132224	1.28279	ETFB_HUMAN Electron transfer flavoprotein subunit beta
Q9BY42	RTFDC1	0.122483	1.28232	RTF2_HUMAN Protein RTF2 homolog
P49419	ALDH7A1	0.108776	1.2822	AL7A1_HUMAN Alpha-aminoadipic semialdehyde dehydrogenase
Q8WY22	BRI3BP	0.0590786	1.28205	BRI3B_HUMAN BRI3-binding protein
Q99439	CNN2	0.101311	1.28124	CNN2_HUMAN Calponin-2
P30101	PDIA3	0.322716	1.28122	PDIA3_HUMAN Protein disulfide-isomerase A3
P46782	RPS5	0.258962	1.28053	RS5_HUMAN 40S ribosomal protein S5
Q9UH62	ARMCX3	0.253359	1.27898	ARMX3_HUMAN Armadillo repeat-containing X-linked protein 3
Q9NYP7	ELOVL5	0.326926	1.27892	ELOV5_HUMAN Elongation of very long chain fatty acids protein 5
O75821	EIF3G	0.354532	1.2771	EIF3G_HUMAN Eukaryotic translation initiation factor 3 subunit G
O75643	SNRNP200	0.330517	1.27675	U520_HUMAN U5 small nuclear ribonucleoprotein 200 kDa helicase
P08708	RPS17	0.125135	1.27637	RS17_HUMAN 40S ribosomal protein S17
Q9HD20	ATP13A1	0.223154	1.27612	AT131_HUMAN Probable cation-transporting ATPase 13A1
Q9BTC0	DIDO1	0.198289	1.27583	DIDO1_HUMAN Death-inducer obliterator 1
Q9UN66	PCDHB8	0.0887708	1.27545	PCDB8_HUMAN Protocadherin beta-8
Q63HN8	RNF213	0.0640457	1.27517	RN213_HUMAN E3 ubiquitin-protein ligase RNF213
Q9NR46	SH3GLB2	0.0560454	1.27513	SHLB2_HUMAN Endophilin-B2
P08183	ABCB1	0.051147	1.27438	MDR1_HUMAN Multidrug resistance protein 1
O94826	TOMM70A	0.109317	1.27362	TOM70_HUMAN Mitochondrial import receptor subunit TOM70
Q5T4S7	UBR4	0.0566722	1.27321	UBR4_HUMAN E3 ubiquitin-protein ligase UBR4
O94761	RECQL4	0.138458	1.27294	RECQ4_HUMAN ATP-dependent DNA helicase Q4
Q14566	MCM6	0.368826	1.272	MCM6_HUMAN DNA replication licensing factor MCM6
Q9NR09	BIRC6	0.080891	1.27117	BIRC6_HUMAN Baculoviral IAP repeat-containing protein 6
O75390	CS	0.111722	1.27071	CISY_HUMAN Citrate synthase, mitochondrial
P22234	PAICS	0.116028	1.26853	PUR6_HUMAN Multifunctional protein ADE2
O00629	KPNA4	0.523149	1.26846	IMA3_HUMAN Importin subunit alpha-3
Q9NVH2	INTS7	0.109806	1.26772	INT7_HUMAN Integrator complex subunit 7
Q9P035	PTPLAD1	0.132807	1.26743	HACD3_HUMAN Very-long-chain (3R)-3-hydroxyacyl-[acyl-carrier protein] dehydratase 3
Q9NRZ7	AGPAT3	0.149242	1.26656	PLCC_HUMAN 1-acyl-sn-glycerol-3-phosphate acyltransferase gamma
P36542	ATP5C1	0.334846	1.26645	ATPG_HUMAN ATP synthase subunit gamma, mitochondrial
P18887	XRCC1	0.398826	1.26621	XRCC1_HUMAN DNA repair protein XRCC1
Q96SB4	SRPK1	0.334538	1.266	SRPK1_HUMAN SRSF protein kinase 1
P26641	EEF1G	0.251204	1.26586	EF1G_HUMAN Elongation factor 1-gamma
P98088	MUC5AC	0.190541	1.26556	MUC5A_HUMAN Mucin-5AC (Fragments)
P35270	SPR	0.110223	1.26454	SPRE_HUMAN Sepiapterin reductase
Q6NUK1	SLC25A24	0.104657	1.26409	SCMC1_HUMAN Calcium-binding mitochondrial carrier protein SCaMC-1
O75298	RTN2	0.0728283	1.26367	RTN2_HUMAN Reticulon-2
[truncated: 1,273 more rows]

## Sheet: Enriched proteins
Table S1(b). Identified proteins with fold change>2 and P<0.05
Uniprot ID	Gene Symbol	P Value	Fold Change	Annotation
P60033	CD81	0.000681052	11.159	CD81_HUMAN CD81 antigen
P21926	CD9	0.000405397	9.68559	CD9_HUMAN CD9 antigen
O60669	SLC16A7	0.000232847	9.28229	MOT2_HUMAN Monocarboxylate transporter 2
Q14623	IHH	0.000207024	8.2064	IHH_HUMAN Indian hedgehog protein
P04424	ASL	0.000218822	8.20077	ARLY_HUMAN Argininosuccinate lyase
P05452	CLEC3B	0.0112785	8.16629	TETN_HUMAN Tetranectin
O95471	CLDN7	0.000443517	8.07107	CLD7_HUMAN Claudin-7
Q96S97	MYADM	0.000255535	7.40546	MYADM_HUMAN Myeloid-associated differentiation marker
O14493	CLDN4	0.0100071	6.83163	CLD4_HUMAN Claudin-4
P02774	GC	0.000408714	6.77617	VTDB_HUMAN Vitamin D-binding protein
Q99584	S100A13	0.00438188	6.64482	S10AD_HUMAN Protein S100-A13
Q14802	FXYD3	0.0406537	6.62656	FXYD3_HUMAN FXYD domain-containing ion transport regulator 3
O94979	SEC31A	0.000885442	6.44366	SC31A_HUMAN Protein transport protein Sec31A
P61769	B2M	0.00828076	6.11779	B2MG_HUMAN Beta-2-microglobulin
P01042	KNG1	0.00204942	5.78189	KNG1_HUMAN Kininogen-1
O15427	SLC16A3	0.0045035	5.77616	MOT4_HUMAN Monocarboxylate transporter 4
M0QZQ9	AKAP8L	0.00332652	5.48952	M0QZQ9_HUMAN A-kinase anchor protein 8-like (Fragment)
P07225	PROS1	0.00040438	5.43964	PROS_HUMAN Vitamin K-dependent protein S
Q9NVJ2	ARL8B	0.00576766	5.28004	ARL8B_HUMAN ADP-ribosylation factor-like protein 8B
P35499	SCN4A	0.011534	5.23816	SCN4A_HUMAN Sodium channel protein type 4 subunit alpha
P14209	CD99	0.0034235	5.15928	CD99_HUMAN CD99 antigen
Q96FZ7	CHMP6	0.000796783	5.14061	CHMP6_HUMAN Charged multivesicular body protein 6
P36955	SERPINF1	0.0136066	5.08748	PEDF_HUMAN Pigment epithelium-derived factor
Q96AW1	VOPP1	0.00147635	5.05202	VOPP1_HUMAN Vesicular, overexpressed in cancer, prosurvival protein 1
P20020	ATP2B1	0.000191329	5.03454	AT2B1_HUMAN Plasma membrane calcium-transporting ATPase 1
P05204	HMGN2	0.0342161	5.02544	HMGN2_HUMAN Non-histone chromosomal protein HMG-17
P63092	GNAS	0.000576368	4.91932	GNAS2_HUMAN Guanine nucleotide-binding protein G(s) subunit alpha isoforms short
Q92597	NDRG1	0.00149266	4.8624	NDRG1_HUMAN Protein NDRG1
P02788	LTF	0.00115165	4.85244	TRFL_HUMAN Lactotransferrin
P62491	RAB11A	0.00204334	4.75815	RB11A_HUMAN Ras-related protein Rab-11A
Q8NB49	ATP11C	0.000907277	4.69703	AT11C_HUMAN Probable phospholipid-transporting ATPase IG
P02749	APOH	0.00119404	4.58236	APOH_HUMAN Beta-2-glycoprotein 1
P53985	SLC16A1	0.000871445	4.57477	MOT1_HUMAN Monocarboxylate transporter 1
P17931	LGALS3	0.00138605	4.51123	LEG3_HUMAN Galectin-3
Q8IZN3	ZDHHC14	0.00127806	4.48852	ZDH14_HUMAN Probable palmitoyltransferase ZDHHC14
P18827	SDC1	0.000395704	4.48072	SDC1_HUMAN Syndecan-1
P08758	ANXA5	0.00816282	4.46373	ANXA5_HUMAN Annexin A5
Q7Z5G4	GOLGA7	0.000442425	4.46005	GOGA7_HUMAN Golgin subfamily A member 7
Q8N4S9	MARVELD2	0.00546915	4.45254	MALD2_HUMAN MARVEL domain-containing protein 2
P61019	RAB2A	0.00303837	4.39514	RAB2A_HUMAN Ras-related protein Rab-2A
Q9NUP9	LIN7C	0.0046102	4.33259	LIN7C_HUMAN Protein lin-7 homolog C
Q9Y287	ITM2B	0.00186513	4.32686	ITM2B_HUMAN Integral membrane protein 2B
P34741	SDC2	0.00345995	4.31979	SDC2_HUMAN Syndecan-2
P19823	ITIH2	0.00470815	4.30869	ITIH2_HUMAN Inter-alpha-trypsin inhibitor heavy chain H2
O95562	SFT2D2	0.00291588	4.30612	SFT2B_HUMAN Vesicle transport protein SFT2B
P12259	F5	8.89365e-05	4.24699	FA5_HUMAN Coagulation factor V
P09382	LGALS1	0.000848242	4.20446	LEG1_HUMAN Galectin-1
Q14168	MPP2	0.0123507	4.16391	MPP2_HUMAN MAGUK p55 subfamily member 2
O75787	ATP6AP2	0.00161544	4.14833	RENR_HUMAN Renin receptor
O94985	CLSTN1	0.00258929	4.12136	CSTN1_HUMAN Calsyntenin-1
P02787	TF	0.00138545	4.11459	TRFE_HUMAN Serotransferrin
Q86X29	LSR	0.00300718	4.08527	LSR_HUMAN Lipolysis-stimulated lipoprotein receptor
Q8TF71	SLC16A10	0.0060349	4.06501	MOT10_HUMAN Monocarboxylate transporter 10
A6NIZ1	0	0.000544703	4.02191	RP1BL_HUMAN Ras-related protein Rap-1b-like protein
Q96A59	MARVELD3	0.000732167	3.98351	MALD3_HUMAN MARVEL domain-containing protein 3
P80723	BASP1	0.00407211	3.97273	BASP1_HUMAN Brain acid soluble protein 1
P00747	PLG	0.0273319	3.96846	PLMN_HUMAN Plasminogen
O15551	CLDN3	0.000550288	3.95427	CLD3_HUMAN Claudin-3
P62834	RAP1A	0.00376721	3.95183	RAP1A_HUMAN Ras-related protein Rap-1A
P13164	IFITM1	0.00188053	3.9495	IFM1_HUMAN Interferon-induced transmembrane protein 1
Q86Y82	STX12	0.000338595	3.92429	STX12_HUMAN Syntaxin-12
P05155	SERPING1	0.000668852	3.86506	IC1_HUMAN Plasma protease C1 inhibitor
P05156	CFI	0.00177317	3.81127	CFAI_HUMAN Complement factor I
P0C0L4	C4A	0.00651448	3.78525	CO4A_HUMAN Complement C4-A
P24593	IGFBP5	0.00169364	3.78211	IBP5_HUMAN Insulin-like growth factor-binding protein 5
Q9P0W8	SPATA7	0.00194384	3.74935	SPAT7_HUMAN Spermatogenesis-associated protein 7
Q8N128	FAM177A1	0.000354862	3.70938	F177A_HUMAN Protein FAM177A1
Q96FH0	MEF2BNB	0.000653928	3.70248	MF2NB_HUMAN Protein MEF2BNB
P62879	GNB2	0.0094443	3.68813	GBB2_HUMAN Guanine nucleotide-binding protein G(I)/G(S)/G(T) subunit beta-2
P01008	SERPINC1	0.00264077	3.67744	ANT3_HUMAN Antithrombin-III
P21741	MDK	0.00103863	3.60948	MK_HUMAN Midkine
Q96BI3	APH1A	0.000104568	3.6081	APH1A_HUMAN Gamma-secretase subunit APH-1A
Q15562	TEAD2	0.0335135	3.60051	TEAD2_HUMAN Transcriptional enhancer factor TEF-4
Q9UBS9	SUCO	0.0197865	3.5886	SUCO_HUMAN SUN domain-containing ossification factor
Q15465	SHH	0.0001837	3.57965	SHH_HUMAN Sonic hedgehog protein
P01344	IGF2	0.00102565	3.53074	IGF2_HUMAN Insulin-like growth factor II
O75955	FLOT1	0.0448384	3.50652	FLOT1_HUMAN Flotillin-1
O75056	SDC3	0.000277102	3.50518	SDC3_HUMAN Syndecan-3
P23142	FBLN1	0.00913777	3.49352	FBLN1_HUMAN Fibulin-1
P62873	GNB1	0.00395904	3.48136	GBB1_HUMAN Guanine nucleotide-binding protein G(I)/G(S)/G(T) subunit beta-1
Q9Y625	GPC6	0.000785742	3.45503	GPC6_HUMAN Glypican-6
Q9BRY0	SLC39A3	0.00027313	3.40893	S39A3_HUMAN Zinc transporter ZIP3
Q8N357	SLC35F6	0.0101443	3.40633	S35F6_HUMAN Solute carrier family 35 member F6
P49006	MARCKSL1	0.00207788	3.36508	MRP_HUMAN MARCKS-related protein
P16520	GNB3	7.94072e-05	3.36359	GBB3_HUMAN Guanine nucleotide-binding protein G(I)/G(S)/G(T) subunit beta-3
Q12891	HYAL2	3.57866e-05	3.36077	HYAL2_HUMAN Hyaluronidase-2
Q9H2A7	CXCL16	0.0172246	3.35883	CXL16_HUMAN C-X-C motif chemokine 16
P08133	ANXA6	0.000990535	3.35658	ANXA6_HUMAN Annexin A6
P51151	RAB9A	0.00502597	3.35241	RAB9A_HUMAN Ras-related protein Rab-9A
P31431	SDC4	0.000668667	3.33124	SDC4_HUMAN Syndecan-4
Q9Y3D6	FIS1	0.0176543	3.26235	FIS1_HUMAN Mitochondrial fission 1 protein
P61225	RAP2B	0.00160288	3.25846	RAP2B_HUMAN Ras-related protein Rap-2b
Q16625	OCLN	0.00116896	3.256	OCLN_HUMAN Occludin
Q5T2T1	MPP7	0.00205532	3.25318	MPP7_HUMAN MAGUK p55 subfamily member 7
Q96RV3	PCNX	0.00389448	3.24991	PCX1_HUMAN Pecanex-like protein 1
P27449	ATP6V0C	0.00278407	3.24966	VATL_HUMAN V-type proton ATPase 16 kDa proteolipid subunit
Q6UWI4	SHISA2	0.00462296	3.24093	SHSA2_HUMAN Protein shisa-2 homolog
Q9NUE0	ZDHHC18	0.0020957	3.22085	ZDH18_HUMAN Palmitoyltransferase ZDHHC18
Q00688	FKBP3	0.0214437	3.21803	FKBP3_HUMAN Peptidyl-prolyl cis-trans isomerase FKBP3
O95484	CLDN9	0.00369573	3.21618	CLD9_HUMAN Claudin-9
P01034	CST3	0.00191796	3.19118	CYTC_HUMAN Cystatin-C
Q99653	CHP1	0.00333365	3.17871	CHP1_HUMAN Calcineurin B homologous protein 1
P10114	RAP2A	0.0094973	3.1465	RAP2A_HUMAN Ras-related protein Rap-2a
Q9Y397	ZDHHC9	0.00206895	3.12763	ZDHC9_HUMAN Palmitoyltransferase ZDHHC9
B9EJG8	TMEM150C	0.0037914	3.12235	T150C_HUMAN Transmembrane protein 150C
P15559	NQO1	0.00099901	3.0985	NQO1_HUMAN NAD(P)H dehydrogenase [quinone] 1
P51511	MMP15	0.00899891	3.08305	MMP15_HUMAN Matrix metalloproteinase-15
Q02790	FKBP4	0.00273439	3.07767	FKBP4_HUMAN Peptidyl-prolyl cis-trans isomerase FKBP4
P01024	C3	0.00505103	3.07143	CO3_HUMAN Complement C3
Q9UBI6	GNG12	0.000301578	3.05862	GBG12_HUMAN Guanine nucleotide-binding protein G(I)/G(S)/G(O) subunit gamma-12
P61224	RAP1B	0.000233475	3.04882	RAP1B_HUMAN Ras-related protein Rap-1b
P20827	EFNA1	0.000354838	3.0409	EFNA1_HUMAN Ephrin-A1
O14556	GAPDHS	0.00421813	3.02986	G3PT_HUMAN Glyceraldehyde-3-phosphate dehydrogenase, testis-specific
Q9UPI3	FLVCR2	0.00177959	3.02908	FLVC2_HUMAN Feline leukemia virus subgroup C receptor-related protein 2
Q5SQS7	SH2D4B	0.0142738	3.02558	SH24B_HUMAN SH2 domain-containing protein 4B
P01033	TIMP1	0.0100358	3.00141	TIMP1_HUMAN Metalloproteinase inhibitor 1
O95456	PSMG1	0.0124434	2.97659	PSMG1_HUMAN Proteasome assembly chaperone 1
Q9H4G4	GLIPR2	0.00280304	2.9643	GAPR1_HUMAN Golgi-associated plant pathogenesis-related protein 1
P54803	GALC	0.00351374	2.93842	GALC_HUMAN Galactocerebrosidase
Q15149	PLEC	0.0216257	2.92988	PLEC_HUMAN Plectin
P12268	IMPDH2	0.0296353	2.92411	IMDH2_HUMAN Inosine-5'-monophosphate dehydrogenase 2
Q9NPI0	TMEM138	0.000360429	2.92045	TM138_HUMAN Transmembrane protein 138
Q96FE7	PIK3IP1	0.00420814	2.91555	P3IP1_HUMAN Phosphoinositide-3-kinase-interacting protein 1
Q9H6L2	TMEM231	0.00196228	2.9144	TM231_HUMAN Transmembrane protein 231
P35221	CTNNA1	0.0020424	2.90752	CTNA1_HUMAN Catenin alpha-1
B9A064	IGLL5	0.00592011	2.9043	IGLL5_HUMAN Immunoglobulin lambda-like polypeptide 5
Q8N1F8	STK11IP	0.00650849	2.90219	S11IP_HUMAN Serine/threonine-protein kinase 11-interacting protein
O15027	SEC16A	0.00202932	2.89192	SC16A_HUMAN Protein transport protein Sec16A
P61421	ATP6V0D1	0.00767538	2.88204	VA0D1_HUMAN V-type proton ATPase subunit d 1
P29373	CRABP2	0.0127008	2.87167	RABP2_HUMAN Cellular retinoic acid-binding protein 2
P49747	COMP	0.0132947	2.84262	COMP_HUMAN Cartilage oligomeric matrix protein
Q06033	ITIH3	0.00532219	2.84207	ITIH3_HUMAN Inter-alpha-trypsin inhibitor heavy chain H3
P36897	TGFBR1	0.00278959	2.82376	TGFR1_HUMAN TGF-beta receptor type-1
O95807	TMEM50A	0.00188525	2.80074	TM50A_HUMAN Transmembrane protein 50A
Q6PJF5	RHBDF2	0.000680143	2.79063	RHDF2_HUMAN Inactive rhomboid protein 2
Q5H9U9	DDX60L	0.00463842	2.77864	DDX6L_HUMAN Probable ATP-dependent RNA helicase DDX60-like
P12429	ANXA3	0.000179007	2.77818	ANXA3_HUMAN Annexin A3
P50552	VASP	0.0163949	2.77162	VASP_HUMAN Vasodilator-stimulated phosphoprotein
Q6PJG6	BRAT1	0.000333664	2.73616	BRAT1_HUMAN BRCA1-associated ATM activator 1
Q6XYQ8	SYT10	0.000523106	2.73236	SYT10_HUMAN Synaptotagmin-10
Q7L1W4	LRRC8D	0.00358649	2.71859	LRC8D_HUMAN Leucine-rich repeat-containing protein 8D
P69905	HBA1	0.0282625	2.71498	HBA_HUMAN Hemoglobin subunit alpha
P18065	IGFBP2	0.00234175	2.70829	IBP2_HUMAN Insulin-like growth factor-binding protein 2
Q3ZCQ3	FAM174B	0.000460384	2.70388	F174B_HUMAN Membrane protein FAM174B
P00734	F2	0.00264966	2.7035	THRB_HUMAN Prothrombin
P57729	RAB38	0.000409251	2.69404	RAB38_HUMAN Ras-related protein Rab-38
P19827	ITIH1	0.0291119	2.67354	ITIH1_HUMAN Inter-alpha-trypsin inhibitor heavy chain H1
P61586	RHOA	0.00941152	2.66056	RHOA_HUMAN Transforming protein RhoA
Q92896	GLG1	0.00244472	2.65997	GSLG1_HUMAN Golgi apparatus protein 1
O15400	STX7	0.00135129	2.65778	STX7_HUMAN Syntaxin-7
O14763	TNFRSF10B	0.00469937	2.65424	TR10B_HUMAN Tumor necrosis factor receptor superfamily member 10B
Q9H0U4	RAB1B	0.00325859	2.64642	RAB1B_HUMAN Ras-related protein Rab-1B
Q13492	PICALM	0.0177133	2.63732	PICAL_HUMAN Phosphatidylinositol-binding clathrin assembly protein
P26196	DDX6	0.0454925	2.63005	DDX6_HUMAN Probable ATP-dependent RNA helicase DDX6
P08134	RHOC	8.32588e-05	2.62786	RHOC_HUMAN Rho-related GTP-binding protein RhoC
Q9HA72	CALHM2	0.00215338	2.62637	CAHM2_HUMAN Calcium homeostasis modulator protein 2
P98196	ATP11A	0.00187659	2.61531	AT11A_HUMAN Probable phospholipid-transporting ATPase IH
P36543	ATP6V1E1	0.0109471	2.60729	VATE1_HUMAN V-type proton ATPase subunit E 1
P61204	ARF3	0.00928154	2.60608	ARF3_HUMAN ADP-ribosylation factor 3
Q53RY4	KRTCAP3	0.000874098	2.60214	KCP3_HUMAN Keratinocyte-associated protein 3
Q9UL26	RAB22A	0.00429596	2.60185	RB22A_HUMAN Ras-related protein Rab-22A
P10619	CTSA	0.00181589	2.6005	PPGB_HUMAN Lysosomal protective protein
P15514	AREG	0.0225964	2.59868	AREG_HUMAN Amphiregulin
P07948	LYN	0.00351334	2.59481	LYN_HUMAN Tyrosine-protein kinase Lyn
Q9Y3L5	RAP2C	0.00302538	2.59138	RAP2C_HUMAN Ras-related protein Rap-2c
Q8WZ42	TTN	5.76076e-05	2.58969	TITIN_HUMAN Titin
P04632	CAPNS1	0.00423341	2.58048	CPNS1_HUMAN Calpain small subunit 1
P07355	ANXA2	0.000816676	2.57601	ANXA2_HUMAN Annexin A2
Q99623	PHB2	0.023334	2.57293	PHB2_HUMAN Prohibitin-2
P05067	APP	0.021208	2.56851	A4_HUMAN Amyloid beta A4 protein
P13637	ATP1A3	0.000141482	2.56545	AT1A3_HUMAN Sodium/potassium-transporting ATPase subunit alpha-3
P04406	GAPDH	0.017033	2.56172	G3P_HUMAN Glyceraldehyde-3-phosphate dehydrogenase
H7C2T4	SPRED2	0.00428815	2.55849	H7C2T4_HUMAN Sprouty-related, EVH1 domain-containing protein 2 (Fragment)
O95716	RAB3D	0.00597297	2.55801	RAB3D_HUMAN Ras-related protein Rab-3D
P10319	HLA-B	0.0111913	2.55492	1B58_HUMAN HLA class I histocompatibility antigen, B-58 alpha chain
O95837	GNA14	0.00607785	2.55414	GNA14_HUMAN Guanine nucleotide-binding protein subunit alpha-14
P09525	ANXA4	0.00451367	2.55202	ANXA4_HUMAN Annexin A4
Q15056	EIF4H	0.0338275	2.54912	IF4H_HUMAN Eukaryotic translation initiation factor 4H
Q96QK1	VPS35	0.00817636	2.54266	VPS35_HUMAN Vacuolar protein sorting-associated protein 35
Q9UBH6	XPR1	0.00486374	2.54041	XPR1_HUMAN Xenotropic and polytropic retrovirus receptor 1
Q99536	VAT1	0.00340949	2.52876	VAT1_HUMAN Synaptic vesicle membrane protein VAT-1 homolog
Q9GZU7	CTDSP1	0.000658825	2.52629	CTDS1_HUMAN Carboxy-terminal domain RNA polymerase II polypeptide A small phosphatase 1
O75487	GPC4	0.0124337	2.52372	GPC4_HUMAN Glypican-4
O00214	LGALS8	0.0122169	2.51833	LEG8_HUMAN Galectin-8
P22692	IGFBP4	0.00322671	2.50917	IBP4_HUMAN Insulin-like growth factor-binding protein 4
P23634	ATP2B4	0.00180751	2.5029	AT2B4_HUMAN Plasma membrane calcium-transporting ATPase 4
Q14254	FLOT2	0.00371826	2.49628	FLOT2_HUMAN Flotillin-2
Q14160	SCRIB	0.00606541	2.49545	SCRIB_HUMAN Protein scribble homolog
P17612	PRKACA	0.00406902	2.49545	KAPCA_HUMAN cAMP-dependent protein kinase catalytic subunit alpha
Q15286	RAB35	0.00420117	2.48337	RAB35_HUMAN Ras-related protein Rab-35
A8MTJ3	GNAT3	0.00107518	2.4811	GNAT3_HUMAN Guanine nucleotide-binding protein G(t) subunit alpha-3
P53675	CLTCL1	0.0105005	2.46535	CLH2_HUMAN Clathrin heavy chain 2
P35670	ATP7B	0.00527667	2.46441	ATP7B_HUMAN Copper-transporting ATPase 2
P46940	IQGAP1	0.00244534	2.45988	IQGA1_HUMAN Ras GTPase-activating-like protein IQGAP1
Q9NQ11	ATP13A2	0.00810177	2.45627	AT132_HUMAN Probable cation-transporting ATPase 13A2
P01111	NRAS	0.0173904	2.44715	RASN_HUMAN GTPase NRas
P50991	CCT4	0.00605913	2.44613	TCPD_HUMAN T-complex protein 1 subunit delta
O15020	SPTBN2	0.00569771	2.44391	SPTN2_HUMAN Spectrin beta chain, non-erythrocytic 2
P17987	TCP1	0.0105752	2.44369	TCPA_HUMAN T-complex protein 1 subunit alpha
Q9UEU0	VTI1B	0.00209807	2.43213	VTI1B_HUMAN Vesicle transport through interaction with t-SNAREs homolog 1B
Q9P296	C5AR2	0.00962809	2.41756	C5AR2_HUMAN C5a anaphylatoxin chemotactic receptor 2
P35232	PHB	0.0397393	2.40064	PHB_HUMAN Prohibitin
P50148	GNAQ	0.00276312	2.39703	GNAQ_HUMAN Guanine nucleotide-binding protein G(q) subunit alpha
Q14103	HNRNPD	0.0377938	2.39637	HNRPD_HUMAN Heterogeneous nuclear ribonucleoprotein D0
O43520	ATP8B1	0.00122987	2.39247	AT8B1_HUMAN Probable phospholipid-transporting ATPase IC
Q9H8M5	CNNM2	0.00704369	2.378	CNNM2_HUMAN Metal transporter CNNM2
P51149	RAB7A	0.00698795	2.37285	RAB7A_HUMAN Ras-related protein Rab-7a
O43493	TGOLN2	0.00364141	2.3657	TGON2_HUMAN Trans-Golgi network integral membrane protein 2
A6NFQ2	FAM115C	0.00329663	2.35612	F115C_HUMAN Protein FAM115C
P45877	PPIC	0.00518633	2.35233	PPIC_HUMAN Peptidyl-prolyl cis-trans isomerase C
Q8IWB9	TEX2	0.00529895	2.34718	TEX2_HUMAN Testis-expressed sequence 2 protein
Q9H3M7	TXNIP	0.00215789	2.33885	TXNIP_HUMAN Thioredoxin-interacting protein
P05023	ATP1A1	0.0057779	2.33827	AT1A1_HUMAN Sodium/potassium-transporting ATPase subunit alpha-1
Q96EI5	TCEAL4	0.0405537	2.3284	TCAL4_HUMAN Transcription elongation factor A protein-like 4
Q13214	SEMA3B	0.00953916	2.3283	SEM3B_HUMAN Semaphorin-3B
P07384	CAPN1	0.000116571	2.31967	CAN1_HUMAN Calpain-1 catalytic subunit
P15313	ATP6V1B1	0.00128911	2.31781	VATB1_HUMAN V-type proton ATPase subunit B, kidney isoform
Q05639	EEF1A2	0.0088184	2.31375	EF1A2_HUMAN Elongation factor 1-alpha 2
O14745	SLC9A3R1	0.000902942	2.31035	NHRF1_HUMAN Na(+)/H(+) exchange regulatory cofactor NHE-RF1
O43399	TPD52L2	0.017684	2.30764	TPD54_HUMAN Tumor protein D54
P01031	C5	0.0248714	2.3075	CO5_HUMAN Complement C5
O60449	LY75	0.0022895	2.3059	LY75_HUMAN Isoform 2 of Lymphocyte antigen 75
A2BFH1	PPIAL4G	0.040168	2.30405	PAL4G_HUMAN Peptidyl-prolyl cis-trans isomerase A-like 4G
P46459	NSF	0.00325462	2.29803	NSF_HUMAN Vesicle-fusing ATPase
P61006	RAB8A	0.00512566	2.29398	RAB8A_HUMAN Ras-related protein Rab-8A
P02008	HBZ	0.0293806	2.29213	HBAZ_HUMAN Hemoglobin subunit zeta
Q658P3	STEAP3	0.00321447	2.28195	STEA3_HUMAN Metalloreductase STEAP3
Q10570	CPSF1	0.0411112	2.2814	CPSF1_HUMAN Cleavage and polyadenylation specificity factor subunit 1
O60423	ATP8B3	0.0187396	2.28085	AT8B3_HUMAN Probable phospholipid-transporting ATPase IK
O75509	TNFRSF21	0.0287833	2.28039	TNR21_HUMAN Tumor necrosis factor receptor superfamily member 21
P49748	ACADVL	0.00870783	2.27882	ACADV_HUMAN Very long-chain specific acyl-CoA dehydrogenase, mitochondrial
P15311	EZR	0.00506069	2.26913	EZRI_HUMAN Ezrin
P04222	HLA-C	0.00065268	2.26905	1C03_HUMAN HLA class I histocompatibility antigen, Cw-3 alpha chain
P30086	PEBP1	0.0399485	2.26572	PEBP1_HUMAN Phosphatidylethanolamine-binding protein 1
P61106	RAB14	0.0139856	2.2578	RAB14_HUMAN Ras-related protein Rab-14
P62820	RAB1A	0.0099033	2.25694	RAB1A_HUMAN Ras-related protein Rab-1A
P35475	IDUA	0.00844073	2.2528	IDUA_HUMAN Alpha-L-iduronidase
P16455	MGMT	0.00947109	2.24619	MGMT_HUMAN Methylated-DNA--protein-cysteine methyltransferase
Q99426	TBCB	0.00548454	2.24078	TBCB_HUMAN Tubulin-folding cofactor B
Q01082	SPTBN1	0.01585	2.2365	SPTB2_HUMAN Spectrin beta chain, non-erythrocytic 1
P26572	MGAT1	0.036637	2.23583	MGAT1_HUMAN Alpha-1,3-mannosyl-glycoprotein 2-beta-N-acetylglucosaminyltransferase
Q13505	MTX1	0.0104853	2.23001	MTX1_HUMAN Metaxin-1
P48740	MASP1	0.00290864	2.21413	MASP1_HUMAN Mannan-binding lectin serine protease 1
Q7Z406	MYH14	0.0289075	2.20575	MYH14_HUMAN Myosin-14
Q71RC9	SMIM5	0.0110479	2.20541	SMIM5_HUMAN Small integral membrane protein 5
P38606	ATP6V1A	0.00867481	2.20459	VATA_HUMAN V-type proton ATPase catalytic subunit A
Q9BSK0	MARVELD1	0.00512142	2.19987	MALD1_HUMAN MARVEL domain-containing protein 1
Q9H3U5	MFSD1	0.00505918	2.19806	MFSD1_HUMAN Major facilitator superfamily domain-containing protein 1
P18085	ARF4	0.0120047	2.18754	ARF4_HUMAN ADP-ribosylation factor 4
Q99988	GDF15	0.00495484	2.18409	GDF15_HUMAN Growth/differentiation factor 15
Q12974	PTP4A2	0.00241018	2.18348	TP4A2_HUMAN Protein tyrosine phosphatase type IVA 2
Q13443	ADAM9	0.00550073	2.18307	ADAM9_HUMAN Disintegrin and metalloproteinase domain-containing protein 9
P48643	CCT5	0.0260495	2.18286	TCPE_HUMAN T-complex protein 1 subunit epsilon
Q8NES3	LFNG	0.00583848	2.17852	LFNG_HUMAN Beta-1,3-N-acetylglucosaminyltransferase lunatic fringe
Q8N114	SHISA5	0.00102527	2.16989	SHSA5_HUMAN Protein shisa-5
Q6P1K1	SLC48A1	0.000406041	2.1664	HRG1_HUMAN Heme transporter HRG1
O75110	ATP9A	0.00522011	2.16523	ATP9A_HUMAN Probable phospholipid-transporting ATPase IIA
P30542	ADORA1	0.00590527	2.16153	AA1R_HUMAN Adenosine receptor A1
O00391	QSOX1	0.0100318	2.15753	QSOX1_HUMAN Sulfhydryl oxidase 1
Q9NU53	GINM1	0.00507178	2.15518	GINM1_HUMAN Glycoprotein integral membrane protein 1
Q8IZF3	GPR115	0.00225087	2.14977	GP115_HUMAN Probable G-protein coupled receptor 115
P11233	RALA	0.0144089	2.14887	RALA_HUMAN Ras-related protein Ral-A
Q9UL25	RAB21	0.0112512	2.14172	RAB21_HUMAN Ras-related protein Rab-21
Q99732	LITAF	0.00546173	2.13896	LITAF_HUMAN Lipopolysaccharide-induced tumor necrosis factor-alpha factor
Q02809	PLOD1	0.00438814	2.13427	PLOD1_HUMAN Procollagen-lysine,2-oxoglutarate 5-dioxygenase 1
P61020	RAB5B	0.00560286	2.12945	RAB5B_HUMAN Ras-related protein Rab-5B
P16471	PRLR	0.00106618	2.1241	PRLR_HUMAN Prolactin receptor
P11166	SLC2A1	0.00815211	2.12363	GTR1_HUMAN Solute carrier family 2, facilitated glucose transporter member 1
Q12846	STX4	0.00718936	2.11648	STX4_HUMAN Syntaxin-4
Q9NZM1	MYOF	0.00276554	2.11641	MYOF_HUMAN Myoferlin
Q8IXU6	SLC35F2	0.0230271	2.11475	S35F2_HUMAN Solute carrier family 35 member F2
Q709F0	ACAD11	0.0300718	2.11168	ACD11_HUMAN Acyl-CoA dehydrogenase family member 11
P84085	ARF5	0.016065	2.11127	ARF5_HUMAN ADP-ribosylation factor 5
Q96DA2	RAB39B	0.00138455	2.10364	RB39B_HUMAN Ras-related protein Rab-39B
P06396	GSN	0.0293056	2.10258	GELS_HUMAN Gelsolin
P51153	RAB13	0.00031273	2.0975	RAB13_HUMAN Ras-related protein Rab-13
P49792	RANBP2	0.040023	2.09609	RBP2_HUMAN E3 SUMO-protein ligase RanBP2
Q12805	EFEMP1	0.012256	2.09408	FBLN3_HUMAN EGF-containing fibulin-like extracellular matrix protein 1
Q96A65	EXOC4	0.00484184	2.0934	EXOC4_HUMAN Exocyst complex component 4
P29966	MARCKS	0.0003476	2.0929	MARCS_HUMAN Myristoylated alanine-rich C-kinase substrate
Q9Y5G0	PCDHGB5	0.00448167	2.09175	PCDGH_HUMAN Protocadherin gamma-B5
Q8NET8	TRPV3	0.00495827	2.08865	TRPV3_HUMAN Transient receptor potential cation channel subfamily V member 3
O00220	TNFRSF10A	0.00153723	2.08583	TR10A_HUMAN Tumor necrosis factor receptor superfamily member 10A
O75155	CAND2	0.00841434	2.08563	CAND2_HUMAN Cullin-associated NEDD8-dissociated protein 2
Q13616	CUL1	0.00252592	2.08425	CUL1_HUMAN Cullin-1
Q92854	SEMA4D	0.0230935	2.07842	SEM4D_HUMAN Semaphorin-4D
Q96HA4	C1orf159	0.0261487	2.07598	CA159_HUMAN Uncharacterized protein C1orf159
O94907	DKK1	0.00178004	2.07451	DKK1_HUMAN Dickkopf-related protein 1
O14980	XPO1	0.00127862	2.06672	XPO1_HUMAN Exportin-1
P42785	PRCP	0.0084417	2.06614	PCP_HUMAN Lysosomal Pro-X carboxypeptidase
P50990	CCT8	0.00391562	2.06564	TCPQ_HUMAN T-complex protein 1 subunit theta
Q13637	RAB32	0.0334989	2.06558	RAB32_HUMAN Ras-related protein Rab-32
P78368	CSNK1G2	0.000603796	2.06225	KC1G2_HUMAN Casein kinase I isoform gamma-2
Q92930	RAB8B	0.00939291	2.05955	RAB8B_HUMAN Ras-related protein Rab-8B
Q6N069	NAA16	0.00995543	2.05561	NAA16_HUMAN N-alpha-acetyltransferase 16, NatA auxiliary subunit
O60911	CTSV	5.16916e-05	2.05324	CATL2_HUMAN Cathepsin L2
B2RUZ4	SMIM1	8.64888e-05	2.05235	SMIM1_HUMAN Small integral membrane protein 1
Q7L576	CYFIP1	0.000476848	2.05093	CYFP1_HUMAN Cytoplasmic FMR1-interacting protein 1
O14787	TNPO2	0.0222418	2.04927	TNPO2_HUMAN Transportin-2
B4DQW3	PVRL4	0.00511317	2.0451	B4DQW3_HUMAN Poliovirus receptor-related protein 4
Q14766	LTBP1	0.00892627	2.04421	LTBP1_HUMAN Latent-transforming growth factor beta-binding protein 1
Q15386	UBE3C	0.00498161	2.04085	UBE3C_HUMAN Ubiquitin-protein ligase E3C
Q13642	FHL1	0.00698409	2.03557	FHL1_HUMAN Four and a half LIM domains protein 1
P35241	RDX	0.0149855	2.02862	RADI_HUMAN Radixin
Q4ZG55	GREB1	0.0280543	2.02847	GREB1_HUMAN Protein GREB1
Q13491	GPM6B	0.00511446	2.02845	GPM6B_HUMAN Isoform 4 of Neuronal membrane glycoprotein M6-b
Q9Y2A7	NCKAP1	0.00852452	2.02781	NCKP1_HUMAN Nck-associated protein 1
Q96SL1	DIRC2	0.00406303	2.02228	DIRC2_HUMAN Disrupted in renal carcinoma protein 2
Q9HB71	CACYBP	0.0353256	2.02202	CYBP_HUMAN Calcyclin-binding protein
Q9BV40	VAMP8	0.00027232	2.02144	VAMP8_HUMAN Vesicle-associated membrane protein 8
Q9NY26	SLC39A1	0.00246292	2.01819	S39A1_HUMAN Zinc transporter ZIP1
Q9NSD9	FARSB	0.0122448	2.01759	SYFB_HUMAN Phenylalanine--tRNA ligase beta subunit
Q8NC54	KCT2	0.00309193	2.00924	KCT2_HUMAN Keratinocyte-associated transmembrane protein 2
Q8N565	MREG	0.0094938	2.00804	MREG_HUMAN Melanoregulin
Q8IUW5	RELL1	0.0014646	2.00469	RELL1_HUMAN RELT-like protein 1
Q01970	PLCB3	0.00326806	2.00141	PLCB3_HUMAN 1-phosphatidylinositol 4,5-bisphosphate phosphodiesterase beta-3
