# Supplementary material for: Unraveling the surface glycoprotein interaction network by integrating chemical crosslinking with MS-based proteomics
Source: Royal Society of Chemistry journal article supplement (doi:10.1039/d0sc06327d), 2021-01-01
Supplement: d0sc06327d3.xlsx [file d0sc06327d3.xlsx]

## Sheet: N-glycosylation
Table S2. Identification of 657 N-glycosylation sites on 328 glycoproteins
Uniprot ID	Gene Symbol	Glycopeptide	z	PPM	XCorr	Site Position	ModScore	Annotation
A1A5B4	ANO9	K.EGN#STVDCLK.G	2	-0.33	1.695	641	1000	ANO9_HUMAN Anoctamin-9
A1A5B4	ANO9	K.GYVN#HSLSVFHTK.D	4	-1.21	2.439	652	1000	ANO9_HUMAN Anoctamin-9
A2RU67	KIAA1467	K.M*LSAFN#ATSGK.A	2	0.62	2.028	237	1000	K1467_HUMAN Uncharacterized protein KIAA1467
A2RU67	KIAA1467	K.APDSN#CSNLLITTR.Q	2	-0.06	2.619	396	73.311	K1467_HUMAN Uncharacterized protein KIAA1467
A8MVS5	HIDE1	R.GVTFN#LSGGSSK.A	2	1.19	2.89	73	1000	HIDE1_HUMAN Protein HIDE1
A8MVW0	FAM171A2	R.ASVDVFGN#R.T	2	-0.09	2.08	66	1000	F1712_HUMAN Protein FAM171A2
A8MWY0	KIAA1324L	K.KDCPPCNPGFYNN#GSSSCHPCPPGTFSDGTK.E	4	1.97	4.788	405	7.71	K132L_HUMAN UPF0577 protein KIAA1324-like
O00468	AGRN	R.DPCSN#VTCSFGSTCAR.S	3	-2.63	1.031	250	1000	AGRIN_HUMAN Agrin
O00468	AGRN	R.CVEESGSAHCVCPM*LTCPEAN#ATK.V	3	2.3	2.518	932	1000	AGRIN_HUMAN Agrin
O14494	PPAP2A	K.IN#CSDGYIEYYICR.G	2	0.58	5.696	142	1000	LPP1_HUMAN Lipid phosphate phosphohydrolase 1
O14672	ADAM10	R.EGICNGFTALCPASDPKPN#FTDCNR.H	3	-0.95	1.266	551	8.594	ADA10_HUMAN Disintegrin and metalloproteinase domain-containing protein 10
O14786	NRP1	K.RGPECSQN#YTTPSGVIK.S	3	-0.06	1.67	150	1000	NRP1_HUMAN Neuropilin-1
O14786	NRP1	K.IGYSNN#GSDWK.M	2	-0.55	2.863	522	24.437	NRP1_HUMAN Neuropilin-1
O15031	PLXNB2	R.EAESLQPM*TVVGTDYVFHN#DTK.V	3	0.82	4.469	1049	1000	PLXB2_HUMAN Plexin-B2
O15031	PLXNB2	R.ALSN#ISLR.L	2	0.09	1.876	127	1000	PLXB2_HUMAN Plexin-B2
O15031	PLXNB2	K.SCVAVTSAQPQN#MSR.R	3	-1.26	1.107	528	1000	PLXB2_HUMAN Plexin-B2
O15031	PLXNB2	R.N#CSFQPER.Y	2	-3.17	1.194	844	1000	PLXB2_HUMAN Plexin-B2
O15118	NPC1	R.VDN#ITDQFCN#ASVVDPACVR.C	2	-3.12	2.356	961	1000	NPC1_HUMAN Niemann-Pick C1 protein
O15118	NPC1	R.VDN#ITDQFCN#ASVVDPACVR.C	2	-3.12	2.356	968	1000	NPC1_HUMAN Niemann-Pick C1 protein
O15230	LAMA5	R.GIN#ASSMAWAR.L	2	0.95	1.396	2196	1000	LAMA5_HUMAN Laminin subunit alpha-5
O15230	LAMA5	R.LN#ASIADLQSQLR.S	2	1.45	2.059	2209	1000	LAMA5_HUMAN Laminin subunit alpha-5
O15230	LAMA5	K.QELSRDN#ATLQATLHAAR.D	4	-0.36	1.339	2423	1000	LAMA5_HUMAN Laminin subunit alpha-5
O15230	LAMA5	R.AQQLLAN#STALEEAM*LQEQQR.L	3	1.04	3.429	2568	1000	LAMA5_HUMAN Laminin subunit alpha-5
O15230	LAMA5	R.GVHN#ASLALSASIGR.V	3	0.3	2.379	2707	1000	LAMA5_HUMAN Laminin subunit alpha-5
O15230	LAMA5	K.RLN#TTGVSAGCTADLLVGR.A	3	0.01	4.516	3107	1000	LAMA5_HUMAN Laminin subunit alpha-5
O15230	LAMA5	K.LVGGPVAGGDPN#QTIR.G	2	-1	2.64	95	1000	LAMA5_HUMAN Laminin subunit alpha-5
O15393	TMPRSS2	K.LN#TSAGNVDIYKK.L	3	0.49	2.036	213	60.358	TMPS2_HUMAN Transmembrane protease serine 2
O15394	NCAM2	K.SFN#ATAER.G	2	-0.43	1.977	219	1000	NCAM2_HUMAN Neural cell adhesion molecule 2
O15394	NCAM2	R.YN#CTATNHIGTR.F	2	-0.41	3.387	474	100.207	NCAM2_HUMAN Neural cell adhesion molecule 2
O15394	NCAM2	K.N#TTNLK.T	2	-0.74	3.032	445	73.311	NCAM2_HUMAN Neural cell adhesion molecule 2
O15394	NCAM2	R.SHGVQTM*VVLNNLEPN#TTYEIR.V	3	0.54	3.321	562	18.805	NCAM2_HUMAN Neural cell adhesion molecule 2
O15438	ABCC3	R.QN#NTSLR.L	2	-0.25	1.11	1006	24.437	MRP3_HUMAN Canalicular multispecific organic anion transporter 2
O15440	ABCC5	K.QGSGN#TTVTR.G	2	3.82	1.841	890	1000	MRP5_HUMAN Multidrug resistance-associated protein 5
O15440	ABCC5	R.GN#ETSVSDSMK.D	2	1.46	1.149	897	1000	MRP5_HUMAN Multidrug resistance-associated protein 5
O43157	PLXNB1	R.LTLN#GSK.L	2	-0.39	2.731	1183	1000	PLXB1_HUMAN Plexin-B1
O43291	SPINT2	K.CATVTEN#ATGDLATSR.N	2	0.83	1.745	94	1000	SPIT2_HUMAN Kunitz-type protease inhibitor 2
O43291	SPINT2	R.N#SCNNFIYGGCR.G	2	-2.24	3.002	156	73.311	SPIT2_HUMAN Kunitz-type protease inhibitor 2
O43657	TSPAN6	K.QYN#STGDYR.S	2	-0.47	3.679	134	1000	TSN6_HUMAN Tetraspanin-6
O43688	PPAP2C	R.VN#CSVYVQLEK.V	3	0.46	1.324	139	1000	LPP2_HUMAN Lipid phosphate phosphohydrolase 2
O60487	MPZL2	R.VLEAVN#GTDAR.L	2	0.12	3.34	39	1000	MPZL2_HUMAN Myelin protein zero-like protein 2
O60503	ADCY9	R.NPCN#SSVPR.D	2	-0.71	3.442	964	53.534	ADCY9_HUMAN Adenylate cyclase type 9
O60603	TLR2	K.N#LTNIDISK.N	2	0.01	3.959	414	73.311	TLR2_HUMAN Toll-like receptor 2
O60637	TSPAN3	K.TYN#GTNPDAASR.A	2	-2.42	2.781	127	53.534	TSN3_HUMAN Tetraspanin-3
O60896	RAMP3	R.QFFSN#CTVDR.V	2	-0.11	1.069	103	1000	RAMP3_HUMAN Receptor activity-modifying protein 3
O75054	IGSF3	R.VQGN#STLLHITDLQAR.D	4	0.95	1.29	101	1000	IGSF3_HUMAN Immunoglobulin superfamily member 3
O75054	IGSF3	R.LSQAQGN#LSVLETR.Q	3	0.03	1.765	825	1000	IGSF3_HUMAN Immunoglobulin superfamily member 3
O75054	IGSF3	R.QVQLECVVLN#R.T	2	0.49	4.34	842	1000	IGSF3_HUMAN Immunoglobulin superfamily member 3
O75054	IGSF3	K.NYN#NTWTR.L	2	0.25	2.539	655	24.437	IGSF3_HUMAN Immunoglobulin superfamily member 3
O75071	EFCAB14	K.KAN#LSFSM*M*GDR.S	3	0.09	1.19	324	1000	EFC14_HUMAN EF-hand calcium-binding domain-containing protein 14
O75096	LRP4	K.VLIN#NSLDEPR.A	2	1.56	2.172	1467	24.437	LRP4_HUMAN Low-density lipoprotein receptor-related protein 4
O75144	ICOSLG	R.LFN#VTPQDEQK.F	3	0.36	1.212	102	1000	ICOSL_HUMAN ICOS ligand
O75144	ICOSLG	K.TVVTYHIPQN#SSLENVDSR.Y	2	2.97	3.271	70	26.927	ICOSL_HUMAN ICOS ligand
O75197	LRP5	R.IEVANLN#GTSR.K	2	-0.47	3.486	138	48.874	LRP5_HUMAN Low-density lipoprotein receptor-related protein 5
O75509	TNFRSF21	K.GMN#STESN#SSASVRPK.V	3	1.66	2.03	252	1000	TNR21_HUMAN Tumor necrosis factor receptor superfamily member 21
O75509	TNFRSF21	K.GMN#STESN#SSASVRPK.V	3	1.66	2.03	257	1000	TNR21_HUMAN Tumor necrosis factor receptor superfamily member 21
O75509	TNFRSF21	K.VLSSIQEGTVPDN#TSSAR.G	2	0.32	1.623	278	1000	TNR21_HUMAN Tumor necrosis factor receptor superfamily member 21
O75882	ATRN	K.CIN#QSICEK.C	2	0.06	4.048	1073	1000	ATRN_HUMAN Attractin
O75882	ATRN	K.CEN#LTTGK.H	2	0.16	1.692	1082	1000	ATRN_HUMAN Attractin
O75882	ATRN	R.GICN#SSDVR.G	2	0.06	1.116	300	1000	ATRN_HUMAN Attractin
O75882	ATRN	K.AATCINPLN#GSVCERPAN#HSAK.Q	4	0.42	5.021	923	63.944	ATRN_HUMAN Attractin
O75882	ATRN	K.ISN#SSDTVECECSENWK.G	2	1.89	1.726	264	52.403	ATRN_HUMAN Attractin
O75882	ATRN	K.AATCINPLN#GSVCERPAN#HSAK.Q	4	0.42	5.021	914	33.657	ATRN_HUMAN Attractin
O75954	TSPAN9	R.N#ATTPLWR.T	2	-0.03	1.154	180	1000	TSN9_HUMAN Tetraspanin-9
O75976	CPD	R.FANEYPN#ITR.L	2	-0.27	3.787	522	76.733	CBPD_HUMAN Carboxypeptidase D
O75976	CPD	K.DSITGSGLEN#ATISVAGINHN#ITTGR.F	3	-0.19	7.322	399	61.56	CBPD_HUMAN Carboxypeptidase D
O75976	CPD	K.DSITGSGLEN#ATISVAGINHN#ITTGR.F	3	-0.19	7.322	410	24.243	CBPD_HUMAN Carboxypeptidase D
O75976	CPD	R.GKDLDTDFTNN#ASQPETK.A	3	0.4	3.444	1070	17.009	CBPD_HUMAN Carboxypeptidase D
O75976	CPD	R.N#NSNNFDLNR.N	2	-0.8	1.19	626	9.34	CBPD_HUMAN Carboxypeptidase D
O76082	SLC22A5	R.CRVPDAAN#LSSAWR.N	3	0.65	1.811	57	1000	S22A5_HUMAN Solute carrier family 22 member 5
O76082	SLC22A5	R.LATIAN#FSALGLEPGR.D	2	2.01	5.182	91	1000	S22A5_HUMAN Solute carrier family 22 member 5
O95084	PRSS23	R.GAN#DSTSAMPEQMK.F	2	0.23	1.068	207	1000	PRS23_HUMAN Serine protease 23
O95136	S1PR2	K.VQEHYN#YTK.E	3	0.57	1.798	19	1000	S1PR2_HUMAN Sphingosine 1-phosphate receptor 2
O95196	CSPG5	R.DLASSEN#GTECR.S	2	-0.2	3.754	355	1000	CSPG5_HUMAN Chondroitin sulfate proteoglycan 5
O95274	LYPD3	K.LN#LTSR.A	2	0.28	1.175	118	1000	LYPD3_HUMAN Ly6/PLAUR domain-containing protein 3
O95274	LYPD3	R.EACQGTSPPVVSCYN#ASDHVYK.G	3	0.16	1.792	163	1000	LYPD3_HUMAN Ly6/PLAUR domain-containing protein 3
O95297	MPZL1	K.EIFVAN#GTQGK.L	3	0.41	1.237	50	1000	MPZL1_HUMAN Myelin protein zero-like protein 1
O95297	MPZL1	K.DASINIENM*QFIHN#GTYICDVK.N	3	0.27	3.792	130	26.045	MPZL1_HUMAN Myelin protein zero-like protein 1
O95477	ABCA1	K.HPEDVQSSN#GSVYTWR.E	3	-0.12	4.688	478	1000	ABCA1_HUMAN ATP-binding cassette sub-family A member 1
O95477	ABCA1	R.EAFN#ETNQAIR.T	2	-0.15	4.321	489	73.311	ABCA1_HUMAN ATP-binding cassette sub-family A member 1
O95631	NTN1	R.SCHLCN#ASDPK.K	3	-0.07	2.324	95	1000	NET1_HUMAN Netrin-1
O95857	TSPAN13	R.NLN#CCGFR.S	2	-0.42	1.542	127	48.874	TSN13_HUMAN Tetraspanin-13
O95857	TSPAN13	R.SVNPN#DTCLASCVK.S	2	0.09	4.932	137	48.874	TSN13_HUMAN Tetraspanin-13
O95858	TSPAN15	R.N#TTEVVNTMCGYK.T	2	1.44	4.312	189	123.857	TSN15_HUMAN Tetraspanin-15
P01892	HLA-A	R.GYYN#QSEAGSHTVQR.M	3	0.39	1.129	110	1000	1A02_HUMAN HLA class I histocompatibility antigen, A-2 alpha chain
P01911	HLA-DRB1	R.ECHFFN#GTER.V	3	-0.62	1.882	48	1000	2B1F_HUMAN HLA class II histocompatibility antigen, DRB1-15 beta chain
P02786	TFRC	K.KDFEDLYTPVN#GSIVIVR.A	2	0.53	3.203	251	1000	TFR1_HUMAN Transferrin receptor protein 1
P02786	TFRC	R.KQNNGAFN#ETLFR.N	3	0.22	3.994	727	84.609	TFR1_HUMAN Transferrin receptor protein 1
P04062	GBA	R.DLGPTLAN#STHHNVR.L	4	-1.54	3.05	309	49.59	GLCM_HUMAN Glucosylceramidase
P04156	PRNP	K.GEN#FTETDVK.M	2	-0.7	1.435	197	1000	PRIO_HUMAN Major prion protein
P04626	ERBB2	R.GHCWGPGPTQCVN#CSQFLR.G	3	0.36	2.075	530	1000	ERBB2_HUMAN Receptor tyrosine-protein kinase erbB-2
P04626	ERBB2	K.FPDEEGACQPCPIN#CTHSCVDLDDKGCPAEQR.A	4	0.35	2.147	629	1000	ERBB2_HUMAN Receptor tyrosine-protein kinase erbB-2
P05026	ATP1B1	R.VLGFKPKPPKN#ESLETYPVMK.Y	5	0.38	1.023	193	1000	AT1B1_HUMAN Sodium/potassium-transporting ATPase subunit beta-1
P05026	ATP1B1	K.LEWLGN#CSGLNDETYGYK.E	2	0.11	5.015	158	81.692	AT1B1_HUMAN Sodium/potassium-transporting ATPase subunit beta-1
P05362	ICAM1	R.AN#LTVVLLR.G	2	0.32	1.569	145	1000	ICAM1_HUMAN Intercellular adhesion molecule 1
P05362	ICAM1	R.DHHGAN#FSCR.T	3	-0.27	1.52	183	1000	ICAM1_HUMAN Intercellular adhesion molecule 1
P05362	ICAM1	R.LNPTVTYGN#DSFSAK.A	2	0.41	1.732	267	51.809	ICAM1_HUMAN Intercellular adhesion molecule 1
P05556	ITGB1	K.DTCTQECSYFN#ITK.V	3	0.23	1.063	669	1000	ITB1_HUMAN Integrin beta-1
P05556	ITGB1	R.KEN#SSEICSNNGECVCGQCVCR.K	3	0.51	6.915	520	149.399	ITB1_HUMAN Integrin beta-1
P05556	ITGB1	R.NPCTSEQN#CTSPFSYK.N	2	0.76	4.861	212	115.974	ITB1_HUMAN Integrin beta-1
P05556	ITGB1	K.NGVN#GTGENGR.K	2	0.47	4.514	406	73.311	ITB1_HUMAN Integrin beta-1
P06213	INSR	R.CVN#FSFCQDLHHK.C	4	0.05	2.029	282	1000	INSR_HUMAN Insulin receptor
P06213	INSR	K.HN#LTITQGK.L	3	0.04	2.1	445	1000	INSR_HUMAN Insulin receptor
P06213	INSR	R.TWSPPFESEDSQKHN#QSEYEDSAGECCSCPK.T	4	-0.95	1.414	698	1000	INSR_HUMAN Insulin receptor
P06213	INSR	R.GLSPGN#YSVR.I	2	-0.12	1.486	920	1000	INSR_HUMAN Insulin receptor
P06731	CEACAM5	R.TLTLFN#VTRN#DTASYK.C	3	0.81	4.955	204	1000	CEAM5_HUMAN Carcinoembryonic antigen-related cell adhesion molecule 5
P06731	CEACAM5	R.N#DTASYK.C	2	0.44	3.245	208	1000	CEAM5_HUMAN Carcinoembryonic antigen-related cell adhesion molecule 5
P06731	CEACAM5	R.N#NSIVK.S	2	-0.37	1.801	665	24.437	CEAM5_HUMAN Carcinoembryonic antigen-related cell adhesion molecule 5
P06731	CEACAM5	K.ITPNNN#GTYACFVSNLATGR.N	3	-0.41	4.381	650	17.009	CEAM5_HUMAN Carcinoembryonic antigen-related cell adhesion molecule 5
P06731	CEACAM5	R.AYVCGIQNSVSAN#R.S	2	-0.33	3.355	580	9.296	CEAM5_HUMAN Carcinoembryonic antigen-related cell adhesion molecule 5
P06731	CEACAM5	K.NSGLYTCQAN#NSASGHSR.T	3	-0.33	1.302	480	6.591	CEAM5_HUMAN Carcinoembryonic antigen-related cell adhesion molecule 5
P06756	ITGAV	K.N#MTISR.G	2	-0.09	1.771	554	1000	ITAV_HUMAN Integrin alpha-V
P06756	ITGAV	K.TEN#QTR.Q	2	-0.08	1.263	704	1000	ITAV_HUMAN Integrin alpha-V
P06756	ITGAV	K.AN#TTQPGIVEGGQVLK.C	3	0.35	2.583	74	1000	ITAV_HUMAN Integrin alpha-V
P06756	ITGAV	K.ISSLQTTEKN#DTVAGQGER.D	4	0.2	1.47	874	1000	ITAV_HUMAN Integrin alpha-V
P06756	ITGAV	K.ENQN#HSYSLK.S	2	-0.51	3.109	945	30.835	ITAV_HUMAN Integrin alpha-V
P07204	THBD	R.GFQWVTGDN#NTSYSR.W	2	-2.23	4.114	115	24.437	TRBM_HUMAN Thrombomodulin
P07602	PSAP	K.LIDNN#KTEK.E	3	0.67	2.093	332	17.009	SAP_HUMAN Prosaposin
P07942	LAMB1	R.VN#ASTTEPN#STVEQSALMR.D	2	-1.6	1.811	1336	1000	LAMB1_HUMAN Laminin subunit beta-1
P07942	LAMB1	R.VN#ASTTEPN#STVEQSALMR.D	2	-1.6	1.811	1343	1000	LAMB1_HUMAN Laminin subunit beta-1
P07949	RET	R.VEHWPN#ETSVQAN#GSFVR.A	3	-0.04	1.524	336	1000	RET_HUMAN Proto-oncogene tyrosine-protein kinase receptor Ret
P07949	RET	R.VEHWPN#ETSVQAN#GSFVR.A	3	-0.04	1.524	343	1000	RET_HUMAN Proto-oncogene tyrosine-protein kinase receptor Ret
P07949	RET	R.N#LSISEN#R.T	2	0.24	1.29	361	1000	RET_HUMAN Proto-oncogene tyrosine-protein kinase receptor Ret
P07949	RET	R.N#LSISEN#R.T	2	0.24	1.29	367	1000	RET_HUMAN Proto-oncogene tyrosine-protein kinase receptor Ret
P07949	RET	R.N#FSTCSPSTK.T	2	-0.14	2.122	554	1000	RET_HUMAN Proto-oncogene tyrosine-protein kinase receptor Ret
P07996	THBS1	K.VVN#STTGPGEHLR.N	3	-0.16	1.94	1067	1000	TSP1_HUMAN Thrombospondin-1
P07996	THBS1	K.KVSCPIMPCSN#ATVPDGECCPR.C	3	-5.27	3.114	360	1000	TSP1_HUMAN Thrombospondin-1
P08069	IGF1R	R.N#GSQSM*YCIPCEGPCPK.V	2	0.42	1.633	314	1000	IGF1R_HUMAN Insulin-like growth factor 1 receptor
P08069	IGF1R	R.DVMQVAN#TTMSSR.S	2	-1.09	1.17	747	1000	IGF1R_HUMAN Insulin-like growth factor 1 receptor
P08069	IGF1R	R.ACTENNECCHPECLGSCSAPDN#DTACVACR.H	3	0.47	7.643	244	127.831	IGF1R_HUMAN Insulin-like growth factor 1 receptor
P08069	IGF1R	R.LNPGN#YTAR.I	2	-0.21	2.046	900	53.534	IGF1R_HUMAN Insulin-like growth factor 1 receptor
P08174	CD55	K.GSQWSDIEEFCN#R.S	3	0.3	1.688	95	1000	DAF_HUMAN Complement decay-accelerating factor
P08195	SLC3A2	K.DASSFLAEWQN#ITK.G	3	3.5	1.45	365	1000	4F2_HUMAN 4F2 cell-surface antigen heavy chain
P08195	SLC3A2	K.SLVTQYLN#ATGNR.W	2	0.36	3.657	424	31.275	4F2_HUMAN 4F2 cell-surface antigen heavy chain
P08473	MME	R.SCIN#ESAIDSR.G	2	0.11	1.676	145	1000	NEP_HUMAN Neprilysin
P08473	MME	K.EIAN#ATAKPEDR.N	2	0.51	1.122	285	1000	NEP_HUMAN Neprilysin
P08582	MFI2	K.CGN#MSEAFR.E	2	-0.91	1.825	38	1000	TRFM_HUMAN Melanotransferrin
P08648	ITGA5	R.TEKEPLSDPVGTCYLSTDN#FTR.I	3	-0.26	4.364	182	1000	ITA5_HUMAN Integrin alpha-5
P08648	ITGA5	K.GN#LTYGYVTILN#GSDIR.S	2	0.1	5.167	297	1000	ITA5_HUMAN Integrin alpha-5
P08648	ITGA5	K.GN#LTYGYVTILN#GSDIR.S	2	0.1	5.167	307	1000	ITA5_HUMAN Integrin alpha-5
P08648	ITGA5	R.N#ESEFR.D	2	0.52	1.303	593	1000	ITA5_HUMAN Integrin alpha-5
P08648	ITGA5	R.HPGN#FSSLSCDYFAVN#QSR.L	3	-0.1	5.908	712	1000	ITA5_HUMAN Integrin alpha-5
P08648	ITGA5	R.HPGN#FSSLSCDYFAVN#QSR.L	3	-0.1	5.908	724	1000	ITA5_HUMAN Integrin alpha-5
P08648	ITGA5	R.VTGLN#CTTNHPINPK.G	2	1.79	3.207	868	31.275	ITA5_HUMAN Integrin alpha-5
P08648	ITGA5	K.NLN#NSQSDVVSFR.L	2	0.06	3.421	773	24.437	ITA5_HUMAN Integrin alpha-5
P08962	CD63	K.CCGAAN#YTDWEK.I	2	0.03	1.696	150	1000	CD63_HUMAN CD63 antigen
P08962	CD63	R.VPDSCCIN#VTVGCGINFNEK.A	2	1.2	2.736	172	58.551	CD63_HUMAN CD63 antigen
P08962	CD63	K.NN#HTASILDR.M	2	-1.14	3.212	130	24.437	CD63_HUMAN CD63 antigen
P09758	TACSTD2	R.HRPTAGAFN#HSDLDAELRR.L	5	0.33	2.042	168	1000	TACD2_HUMAN Tumor-associated calcium signal transducer 2
P09758	TACSTD2	R.QN#TSQK.A	2	-0.03	1.516	208	1000	TACD2_HUMAN Tumor-associated calcium signal transducer 2
P09758	TACSTD2	R.QCN#QTSVCWCVNSVGVR.R	2	0.71	4.445	120	154.915	TACD2_HUMAN Tumor-associated calcium signal transducer 2
P0C7U0	ELFN1	R.MYTLEHFN#NSK.A	3	0.39	2.731	349	6.591	ELFN1_HUMAN Protein ELFN1
P10319	HLA-B	R.YYN#QSEAGSHIIQR.M	3	0.84	2.835	110	1000	1B58_HUMAN HLA class I histocompatibility antigen, B-58 alpha chain
P10586	PTPRF	R.DINSQQELQN#ITTDTR.F	2	1.59	5.534	966	171.059	PTPRF_HUMAN Receptor-type tyrosine-protein phosphatase F
P10909	CLU	K.EDALN#ETR.E	2	-0.27	1.469	86	1000	CLUS_HUMAN Clusterin
P11047	LAMC1	K.N#ISQDLEK.Q	2	1.08	3.498	1241	1000	LAMC1_HUMAN Laminin subunit gamma-1
P11047	LAMC1	R.IASAVQKN#ATSTK.A	3	1.04	1.619	1439	1000	LAMC1_HUMAN Laminin subunit gamma-1
P11047	LAMC1	R.TLAGEN#QTAFEIEELNR.K	2	2.33	7.038	1223	148.399	LAMC1_HUMAN Laminin subunit gamma-1
P11047	LAMC1	R.CDQCEENYFYN#R.S	2	-0.42	3.386	1022	31.275	LAMC1_HUMAN Laminin subunit gamma-1
P11047	LAMC1	R.VN#NTLSSQISR.L	2	0.15	1.54	1107	24.437	LAMC1_HUMAN Laminin subunit gamma-1
P11117	ACP2	R.YEQLQN#ETR.Q	2	-0.76	1.689	167	1000	PPAL_HUMAN Lysosomal acid phosphatase
P11117	ACP2	R.QTPEYQN#ESSR.N	2	-0.28	1.275	177	1000	PPAL_HUMAN Lysosomal acid phosphatase
P11117	ACP2	R.YHGFLN#TSYHR.Q	2	0.12	1.465	92	1000	PPAL_HUMAN Lysosomal acid phosphatase
P11166	SLC2A1	K.VIEEFYN#QTWVHR.Y	3	3.53	4.978	45	1000	GTR1_HUMAN Solute carrier family 2, facilitated glucose transporter member 1
P11279	LAMP1	R.GHTLTLN#FTRN#ATR.Y	4	0.04	2.845	103	1000	LAMP1_HUMAN Lysosome-associated membrane glycoprotein 1
P11279	LAMP1	R.GHTLTLN#FTRN#ATR.Y	4	0.04	2.845	107	1000	LAMP1_HUMAN Lysosome-associated membrane glycoprotein 1
P11279	LAMP1	K.DN#TTVTR.L	2	0	1.58	249	1000	LAMP1_HUMAN Lysosome-associated membrane glycoprotein 1
P11279	LAMP1	K.SGPKN#M*TFDLPSDATVVLN#R.S	3	1.77	3.369	62	1000	LAMP1_HUMAN Lysosome-associated membrane glycoprotein 1
P11279	LAMP1	K.SGPKN#M*TFDLPSDATVVLN#R.S	3	1.77	3.369	76	1000	LAMP1_HUMAN Lysosome-associated membrane glycoprotein 1
P11279	LAMP1	R.SSCGKEN#TSDPSLVIAFGR.G	4	-0.23	1.361	84	1000	LAMP1_HUMAN Lysosome-associated membrane glycoprotein 1
P11279	LAMP1	R.CVSGTQVHM*NN#VTVTLHDATIQAYLSN#SSFSR.G	4	0.97	7.802	181	81.709	LAMP1_HUMAN Lysosome-associated membrane glycoprotein 1
P11279	LAMP1	R.CVSGTQVHM*NN#VTVTLHDATIQAYLSN#SSFSR.G	4	0.97	7.802	165	7.71	LAMP1_HUMAN Lysosome-associated membrane glycoprotein 1
P11717	IGF2R	K.GYPCGGN#K.T	2	0.68	1.696	2085	1000	MPRI_HUMAN Cation-independent mannose-6-phosphate receptor
P11717	IGF2R	R.GCPEDAAVCAVDKN#GSK.N	3	1.49	3.572	543	1000	MPRI_HUMAN Cation-independent mannose-6-phosphate receptor
P11717	IGF2R	R.SLLEFN#TTVSCDQQGTNHR.V	3	-0.61	4.262	112	61.958	MPRI_HUMAN Cation-independent mannose-6-phosphate receptor
P11717	IGF2R	R.M*SVINFECN#K.T	2	0.58	1.514	435	44.278	MPRI_HUMAN Cation-independent mannose-6-phosphate receptor
P11717	IGF2R	R.AACAVKPQEVQMVN#GTITNPINGK.S	3	-2.25	7.374	2136	36.556	MPRI_HUMAN Cation-independent mannose-6-phosphate receptor
P11717	IGF2R	R.DAGVGFPEYQEEDN#STYNFR.W	2	0.89	4.135	747	12.092	MPRI_HUMAN Cation-independent mannose-6-phosphate receptor
P12821	ACE	K.NMQIAN#HTLK.Y	3	1.36	2.696	695	49.59	ACE_HUMAN Angiotensin-converting enzyme
P13473	LAMP2	R.LN#SSTIK.Y	2	-0.03	2.135	275	1000	LAMP2_HUMAN Lysosome-associated membrane glycoprotein 2
P13473	LAMP2	R.VQPFN#VTQGK.Y	3	0.13	1.376	356	1000	LAMP2_HUMAN Lysosome-associated membrane glycoprotein 2
P13473	LAMP2	K.WQM*N#FTVR.Y	2	-0.14	1.26	49	1000	LAMP2_HUMAN Lysosome-associated membrane glycoprotein 2
P13473	LAMP2	R.YETTN#K.T	2	0.08	1.652	58	1000	LAMP2_HUMAN Lysosome-associated membrane glycoprotein 2
P13473	LAMP2	K.TVTISDHGTVTYN#GSICGDDQNGPK.I	3	1.8	7.867	75	69.812	LAMP2_HUMAN Lysosome-associated membrane glycoprotein 2
P13473	LAMP2	K.VASVININPN#TTHSTGSCR.S	3	0.16	3.923	257	31.275	LAMP2_HUMAN Lysosome-associated membrane glycoprotein 2
P13987	CD59	K.TAVN#CSSDFDACLITK.A	3	0.14	1.592	43	1000	CD59_HUMAN CD59 glycoprotein
P14384	CPM	K.TVAQN#YSSVTHLHSIGK.S	4	-1.09	1.144	38	1000	CBPM_HUMAN Carboxypeptidase M
P14384	CPM	K.SQN#FSALKK.D	3	-0.37	2.035	384	1000	CBPM_HUMAN Carboxypeptidase M
P15151	PVR	R.VEDEGN#YTCLFVTFPQGSR.S	3	-0.06	1.091	120	1000	PVR_HUMAN Poliovirus receptor
P15260	IFNGR1	R.M*N#GSEIQYK.I	2	-3.04	1.148	179	1000	INGR1_HUMAN Interferon gamma receptor 1
P15309	ACPP	K.FLN#ESYK.H	2	1.15	1.8	94	1000	PPAP_HUMAN Prostatic acid phosphatase
P15514	AREG	R.VEQVVKPPQN#K.T	3	-0.43	1.259	113	1000	AREG_HUMAN Amphiregulin
P16070	CD44	K.AFN#STLPTM*AQM*EK.A	3	0.06	1.16	57	1000	CD44_HUMAN CD44 antigen
P16144	ITGB4	R.CSFRDEDDDCTYSYTM*EGDGAPGPN#STVLVHK.K	4	0.25	7.701	695	1000	ITB4_HUMAN Integrin beta-4
P16422	EPCAM	K.AEMN#GSK.L	2	-0.28	1.096	74	1000	EPCAM_HUMAN Epithelial cell adhesion molecule
P16422	EPCAM	K.QCN#GTSMCWCVNTAGVR.R	2	0.9	3.251	111	137.202	EPCAM_HUMAN Epithelial cell adhesion molecule
P17181	IFNAR1	K.LSGCQN#ITSTK.C	2	0.27	3.57	81	1000	INAR1_HUMAN Interferon alpha/beta receptor 1
P17301	ITGA2	R.TASCSN#VTCWLK.D	2	2.22	2.67	1057	1000	ITA2_HUMAN Integrin alpha-2
P17301	ITGA2	K.GEYFVN#VTTR.I	2	0.31	1.406	1074	1000	ITA2_HUMAN Integrin alpha-2
P17301	ITGA2	R.YFFN#VSDEAALLEK.A	3	0.21	2.863	343	1000	ITA2_HUMAN Integrin alpha-2
P17301	ITGA2	K.LNLQTSTSIPN#VTEM*K.T	3	1.22	3.9	105	44.425	ITA2_HUMAN Integrin alpha-2
P18084	ITGB5	R.DCVECLLLHSGKPDN#QTCHSLCR.D	5	0.26	1.492	654	1000	ITB5_HUMAN Integrin beta-5
P18084	ITGB5	K.SN#LTVLR.E	2	-0.08	2.124	705	1000	ITB5_HUMAN Integrin beta-5
P18084	ITGB5	R.CECQDGEN#QSVYQNLCR.E	2	-3.95	2.356	505	57.711	ITB5_HUMAN Integrin beta-5
P18084	ITGB5	K.CHAGYIGDNCN#CSTDISTCR.G	3	-0.87	4.209	586	20.167	ITB5_HUMAN Integrin beta-5
P19256	CD58	K.RN#STSIYFK.M	3	-0.23	1.363	169	1000	LFA3_HUMAN Lymphocyte function-associated antigen 3
P19438	TNFRSF1A	K.YIHPQN#NSICCTK.C	3	-0.66	4.466	54	30.835	TNR1A_HUMAN Tumor necrosis factor receptor superfamily member 1A
P20273	CD22	R.EGDTVTLSCNYN#SSNPSVTR.Y	2	0.88	4.023	445	30.835	CD22_HUMAN B-cell receptor CD22
P20645	M6PR	R.LKPLFN#K.S	3	0.22	1.911	57	1000	MPRD_HUMAN Cation-dependent mannose-6-phosphate receptor
P20645	M6PR	R.EAGN#HTSGAGLVQINK.S	2	0.12	5.047	83	243.42	MPRD_HUMAN Cation-dependent mannose-6-phosphate receptor
P21589	NT5E	R.IKLDN#YSTQELGK.T	3	0.23	1.731	333	1000	5NTD_HUMAN 5'-nucleotidase
P21589	NT5E	K.CVN#ASR.C	2	0.11	1.141	53	1000	5NTD_HUMAN 5'-nucleotidase
P21709	EPHA1	R.SPGAN#LTYELHVLNQDEER.Y	3	0.38	6.554	478	124.922	EPHA1_HUMAN Ephrin type-A receptor 1
P21860	ERBB3	R.HFN#DSGACVPR.C	3	-0.34	1.677	250	1000	ERBB3_HUMAN Receptor tyrosine-protein kinase erbB-3
P21860	ERBB3	R.QLCYHHSLN#WTK.V	3	0.29	2.223	469	1000	ERBB3_HUMAN Receptor tyrosine-protein kinase erbB-3
P21860	ERBB3	R.EFAHEAECFSCHPECQPM*EGTATCN#GSGSDTCAQCAHFR.D	5	0.51	1.813	566	1000	ERBB3_HUMAN Receptor tyrosine-protein kinase erbB-3
P21860	ERBB3	K.NLN#VTSLGFR.S	2	0.44	3.575	437	48.874	ERBB3_HUMAN Receptor tyrosine-protein kinase erbB-3
P21860	ERBB3	K.YPDVQNECRPCHEN#CTQGCK.G	4	-0.63	5.019	616	42.19	ERBB3_HUMAN Receptor tyrosine-protein kinase erbB-3
P21860	ERBB3	K.YPDVQN#ECRPCHENCTQGCK.G	5	-0.19	1.2	608	0.69	ERBB3_HUMAN Receptor tyrosine-protein kinase erbB-3
P22223	CDH3	R.QVLN#ITDK.D	2	0.12	3.049	566	1000	CADH3_HUMAN Cadherin-3
P22413	ENPP1	K.MN#ASFSLK.S	2	0.32	2.3	285	1000	ENPP1_HUMAN Ectonucleotide pyrophosphatase/phosphodiesterase family member 1
P22413	ENPP1	K.MYN#GSVPFEER.I	2	-0.6	1.483	341	1000	ENPP1_HUMAN Ectonucleotide pyrophosphatase/phosphodiesterase family member 1
P22413	ENPP1	K.CSFYKN#NTK.V	3	-0.09	1.554	731	6.591	ENPP1_HUMAN Ectonucleotide pyrophosphatase/phosphodiesterase family member 1
P22607	FGFR3	R.LQVLN#ASHEDSGAYSCR.Q	3	-0.84	3.381	98	1000	FGFR3_HUMAN Fibroblast growth factor receptor 3
P23229	ITGA6	K.EINSLN#LTESHNSR.K	3	0.56	4.768	930	57.711	ITA6_HUMAN Integrin alpha-6
P23470	PTPRG	R.SDFSQTM*LFQAN#TTR.I	3	-0.2	1.164	444	1000	PTPRG_HUMAN Receptor-type tyrosine-protein phosphatase gamma
P23470	PTPRG	K.VEFHWGHSN#GSAGSEHSINGR.R	4	-0.03	5.717	156	89.08	PTPRG_HUMAN Receptor-type tyrosine-protein phosphatase gamma
P24394	IL4R	K.MNGPTN#CSTELR.L	2	0.63	1.846	53	59.298	IL4RA_HUMAN Interleukin-4 receptor subunit alpha
P25106	ACKR3	K.TVTSASNN#ETYCR.S	2	0.32	5.606	192	24.437	ACKR3_HUMAN Atypical chemokine receptor 3
P25445	FAS	R.LCDEGHGLEVEIN#CTR.T	3	-0.89	1.897	118	1000	TNR6_HUMAN Tumor necrosis factor receptor superfamily member 6
P26006	ITGA3	R.MN#ITVK.N	2	0.21	1.27	107	1000	ITA3_HUMAN Integrin alpha-3
P26006	ITGA3	K.N#ITIVTGAPR.H	2	-0.05	1.959	265	1000	ITA3_HUMAN Integrin alpha-3
P26006	ITGA3	R.RN#ITLAYTLEADR.D	3	0.07	1.192	511	1000	ITA3_HUMAN Integrin alpha-3
P26006	ITGA3	R.ELAVPDGYTN#R.T	2	-0.01	1.084	86	1000	ITA3_HUMAN Integrin alpha-3
P26006	ITGA3	R.AHCVWLECPIPDAPVVTN#VTVK.A	3	0.18	6.255	926	1000	ITA3_HUMAN Integrin alpha-3
P26006	ITGA3	K.LLLSIN#VTNTR.T	2	0.87	3.696	656	53.534	ITA3_HUMAN Integrin alpha-3
P26006	ITGA3	R.TSIPTINMEN#K.T	2	3.95	3.219	969	53.534	ITA3_HUMAN Integrin alpha-3
P27701	CD82	K.GFCEAPGN#R.T	2	0.79	1.33	198	1000	CD82_HUMAN CD82 antigen
P28799	GRN	K.DVECGEGHFCHDN#QTCCR.D	4	0.3	2.907	530	1000	GRN_HUMAN Granulins
P29317	EPHA2	R.TSVTVSDLEPHM*N#YTFTVEAR.N	3	-0.45	4.881	407	1000	EPHA2_HUMAN Ephrin type-A receptor 2
P29317	EPHA2	R.TASVSIN#QTEPPK.V	2	0.11	3.949	435	1000	EPHA2_HUMAN Ephrin type-A receptor 2
P29323	EPHB2	K.ELSEYN#ATAIK.S	2	1.76	1.127	482	1000	EPHB2_HUMAN Ephrin type-B receptor 2
P30464	HLA-B	R.GYYN#QSEAGSHTLQR.M	3	0.1	2.022	110	1000	1B15_HUMAN HLA class I histocompatibility antigen, B-15 alpha chain
P30511	HLA-F	R.YN#QSEAGSHTLQGMNGCDMGPDGR.L	3	-0.08	2.699	107	71.153	HLAF_HUMAN HLA class I histocompatibility antigen, alpha chain F
P30825	SLC7A1	K.NWQLTEEDFGN#TSGR.L	2	0.66	5.643	226	177.905	CTR1_HUMAN High affinity cationic amino acid transporter 1
P30825	SLC7A1	R.LCLNN#DTK.E	2	0.33	3.601	235	24.437	CTR1_HUMAN High affinity cationic amino acid transporter 1
P30988	CALCR	R.MQQLPAYQGEGPYCN#R.T	3	0.29	1.044	91	1000	CALCR_HUMAN Calcitonin receptor
P30988	CALCR	R.TWSN#YTM*CNAFTPEK.L	2	1.06	2.219	148	51.004	CALCR_HUMAN Calcitonin receptor
P32004	L1CAM	R.FFPYAN#GTLGIR.D	2	1.63	2.469	479	1000	L1CAM_HUMAN Neural cell adhesion molecule L1
P32004	L1CAM	R.DLQAN#DTGR.Y	2	0.11	1.939	490	1000	L1CAM_HUMAN Neural cell adhesion molecule L1
P32004	L1CAM	R.LVIHSLDYSDQGN#YSCVASTELDVVESR.A	3	0.64	6.573	588	1000	L1CAM_HUMAN Neural cell adhesion molecule L1
P32004	L1CAM	K.VPGN#QTSTTLK.L	2	-0.2	1.217	671	1000	L1CAM_HUMAN Neural cell adhesion molecule L1
P32004	L1CAM	R.GYN#VTYWR.E	2	0.37	2.775	849	1000	L1CAM_HUMAN Neural cell adhesion molecule L1
P32004	L1CAM	R.VTYQNHN#K.T	3	0.42	3.268	294	31.275	L1CAM_HUMAN Neural cell adhesion molecule L1
P32004	L1CAM	K.EELGVTVYQSPHSGSFTITGN#NSNFAQR.F	3	0.83	5.124	100	7.71	L1CAM_HUMAN Neural cell adhesion molecule L1
P33527	ABCC1	K.FVN#DTK.A	2	-0.38	1.887	354	1000	MRP1_HUMAN Multidrug resistance-associated protein 1
P34925	RYK	K.TSALDKN#TSR.T	3	-1.89	1.669	206	1000	RYK_HUMAN Tyrosine-protein kinase RYK
P35613	BSG	K.ILLTCSLN#DSATEVTGHR.W	3	1.2	1.384	160	1000	BASI_HUMAN Basigin
P35613	BSG	K.ALMN#GSESR.F	2	0.15	1.404	268	1000	BASI_HUMAN Basigin
P36941	LTBR	K.AGHFQN#TSSPSAR.C	3	-0.8	1.503	177	1000	TNR3_HUMAN Tumor necrosis factor receptor superfamily member 3
P37173	TGFBR2	R.KNDEN#ITLETVCHDPK.L	4	0.18	1.922	94	15.007	TGFR2_HUMAN TGF-beta receptor type-2
P40189	IL6ST	R.ETHLETN#FTLK.S	3	-0.35	1.246	157	1000	IL6RB_HUMAN Interleukin-6 receptor subunit beta
P40189	IL6ST	K.SHLQN#YTVN#ATK.L	2	0.29	2.221	379	1000	IL6RB_HUMAN Interleukin-6 receptor subunit beta
P40189	IL6ST	K.SHLQN#YTVN#ATK.L	2	0.29	2.221	383	1000	IL6RB_HUMAN Interleukin-6 receptor subunit beta
P40189	IL6ST	R.N#YTIFYR.T	2	1.04	2.173	553	1000	IL6RB_HUMAN Interleukin-6 receptor subunit beta
P40189	IL6ST	K.N#LSCIVNEGK.K	2	-1	4.376	131	146.622	IL6RB_HUMAN Interleukin-6 receptor subunit beta
P40189	IL6ST	K.LTVN#LTNDR.Y	2	-1.02	3.135	390	73.311	IL6RB_HUMAN Interleukin-6 receptor subunit beta
P42702	LIFR	R.KVPSN#STETVIESDEFRPGIR.Y	4	0.35	4.671	680	1000	LIFR_HUMAN Leukemia inhibitory factor receptor
P42892	ECE1	K.HLLEN#STASVSEAER.K	3	0.52	1.965	166	1000	ECE1_HUMAN Endothelin-converting enzyme 1
P42892	ECE1	R.ACM*N#ETR.I	2	0.25	1.668	187	1000	ECE1_HUMAN Endothelin-converting enzyme 1
P42892	ECE1	R.LGGWN#ITGPWAK.D	2	0.89	5.312	210	1000	ECE1_HUMAN Endothelin-converting enzyme 1
P42892	ECE1	R.DYYLN#K.T	2	0.23	1.984	270	1000	ECE1_HUMAN Endothelin-converting enzyme 1
P42892	ECE1	R.FFN#FSWR.V	2	1.77	2.848	539	1000	ECE1_HUMAN Endothelin-converting enzyme 1
P42892	ECE1	K.N#SSVEAFKR.Q	3	0.24	1.892	632	1000	ECE1_HUMAN Endothelin-converting enzyme 1
P42892	ECE1	R.QTECM*VEQYSN#YSVNGEPVNGR.H	2	2.12	3.142	651	31.275	ECE1_HUMAN Endothelin-converting enzyme 1
P43007	SLC1A4	K.VVTQN#SSSGN#VTHEK.I	3	0.05	2.146	201	1000	SATT_HUMAN Neutral amino acid transporter A
P43007	SLC1A4	K.VVTQN#SSSGN#VTHEK.I	3	0.05	2.146	206	1000	SATT_HUMAN Neutral amino acid transporter A
P46531	NOTCH1	R.N#SSFHFLR.E	3	0.02	1.678	1587	1000	NOTC1_HUMAN Neurogenic locus notch homolog protein 1
P48960	CD97	R.WCPQN#SSCVN#ATACR.C	2	-0.83	1.37	33	1000	CD97_HUMAN CD97 antigen
P48960	CD97	R.GDKN#VTMGQSSAR.M	3	-0.21	2.708	371	1000	CD97_HUMAN CD97 antigen
P48960	CD97	R.WCPQN#SSCVN#ATACR.C	2	-0.83	1.37	38	1000	CD97_HUMAN CD97 antigen
P48960	CD97	K.TFKN#ESENTCQDVDECQQNPR.L	3	0.11	6.176	108	49.312	CD97_HUMAN CD97 antigen
P48960	CD97	R.RLSAVNSIFLSHN#NTK.E	4	0.56	1.813	453	6.591	CD97_HUMAN CD97 antigen
P49281	SLC11A2	K.DN#STLAVDIYK.G	2	-0.09	1.284	349	1000	NRAM2_HUMAN Natural resistance-associated macrophage protein 2
P49281	SLC11A2	K.TNEQVVEVCTN#TSSPHAGLFPK.D	3	3.83	5.78	336	69.812	NRAM2_HUMAN Natural resistance-associated macrophage protein 2
P49792	RANBP2	K.SN#FSEK.A	2	0.1	1.522	1844	1000	RBP2_HUMAN E3 SUMO-protein ligase RanBP2
P50851	LRBA	K.LFN#NSR.E	2	0.4	1.292	851	24.437	LRBA_HUMAN Lipopolysaccharide-responsive and beige-like anchor protein
P50895	BCAM	K.VLSLPLN#SSAVVN#CSVHGLPTPALR.W	3	3.38	5.429	377	1000	BCAM_HUMAN Basal cell adhesion molecule
P50895	BCAM	K.VLSLPLN#SSAVVN#CSVHGLPTPALR.W	3	3.38	5.429	383	1000	BCAM_HUMAN Basal cell adhesion molecule
P50895	BCAM	R.TQN#FTLLVQGSPELK.T	3	0.27	1.47	439	1000	BCAM_HUMAN Basal cell adhesion molecule
P51790	CLCN3	R.NDMN#ASK.I	2	-1.11	2.748	479	53.534	CLCN3_HUMAN H(+)/Cl(-) exchange transporter 3
P51795	CLCN5	K.LCDYENRFN#TSK.G	3	0.09	1.887	408	15.007	CLCN5_HUMAN H(+)/Cl(-) exchange transporter 5
P52569	SLC7A2	K.N#ISASAR.E	2	-0.16	1.916	227	1000	CTR2_HUMAN Low affinity cationic amino acid transporter 2
P53801	PTTG1IP	K.N#VSCLWCNTNK.A	2	3.01	3.058	54	171.059	PTTG_HUMAN Pituitary tumor-transforming gene 1 protein-interacting protein
P54289	CACNA2D1	K.DDLDPEKN#DSEPGSQR.I	3	-1.06	2.346	136	1000	CA2D1_HUMAN Voltage-dependent calcium channel subunit alpha-2/delta-1
P54709	ATP1B3	K.FLKPYTLEEQKN#LTVCPDGALFEQK.G	4	0.29	2.456	124	1000	AT1B3_HUMAN Sodium/potassium-transporting ATPase subunit beta-3
P54709	ATP1B3	K.LHVGYLQPLVAVQVSFAPN#NTGK.E	3	0.15	6.93	240	7.71	AT1B3_HUMAN Sodium/potassium-transporting ATPase subunit beta-3
P54760	EPHB4	K.CAQLTVN#LTR.F	2	-0.04	1.601	203	1000	EPHB4_HUMAN Ephrin type-B receptor 4
P54760	EPHB4	R.LN#GSSLHLEWSAPLESGGR.E	3	-3.6	3.547	335	1000	EPHB4_HUMAN Ephrin type-B receptor 4
P54764	EPHA4	R.GSCVN#NSEEKDVPK.M	3	-0.39	2.135	235	30.835	EPHA4_HUMAN Ephrin type-A receptor 4
P55058	PLTP	K.VSN#VSCQASVSR.M	2	-0.16	3.539	143	1000	PLTP_HUMAN Phospholipid transfer protein
P55083	MFAP4	K.RFN#GSVSFFR.G	3	0.77	3.43	87	1000	MFAP4_HUMAN Microfibril-associated glycoprotein 4
P55259	GP2	R.QDLN#SSDVHSLQPQLDCGPR.E	3	-0.52	3.662	216	1000	GP2_HUMAN Pancreatic secretory granule membrane major glycoprotein GP2
P55268	LAMB2	R.LALN#LTLR.Q	2	-0.17	2.937	1308	1000	LAMB2_HUMAN Laminin subunit beta-2
P55268	LAMB2	R.AQAALDKAN#ASR.G	3	-0.18	1.171	1499	1000	LAMB2_HUMAN Laminin subunit beta-2
P55268	LAMB2	R.RAN#TSALAVPSPVSNSASAR.H	2	0.55	3.359	1348	170.167	LAMB2_HUMAN Laminin subunit beta-2
P56159	GFRA1	K.ETN#FSLASGLEAK.D	3	3.46	1.123	59	1000	GFRA1_HUMAN GDNF family receptor alpha-1
P56159	GFRA1	K.LKSN#VSGNTHLCISNGNYEK.E	4	1.77	3.36	406	38.371	GFRA1_HUMAN GDNF family receptor alpha-1
P56199	ITGA1	R.GN#LSTEK.F	2	-0.31	2.679	317	1000	ITA1_HUMAN Integrin alpha-1
P78310	CXADR	K.N#ASSEYSGTYSCTVR.N	2	0.47	2.617	201	1000	CXAR_HUMAN Coxsackievirus and adenovirus receptor
P78324	SIRPA	R.GTAN#LSETIR.V	2	0.07	3.345	245	1000	SHPS1_HUMAN Tyrosine-protein phosphatase non-receptor type substrate 1
P78324	SIRPA	R.AENQVN#VTCQVR.K	2	0.07	2.535	270	53.534	SHPS1_HUMAN Tyrosine-protein phosphatase non-receptor type substrate 1
P78504	JAG1	K.CPEDYEGKN#CSHLK.D	3	-0.15	1.142	559	1000	JAG1_HUMAN Protein jagged-1
P78536	ADAM17	K.VVVVDGKN#ESEYTVK.W	3	1.19	1.915	103	1000	ADA17_HUMAN Disintegrin and metalloproteinase domain-containing protein 17
P78536	ADAM17	K.MFSN#CSK.Q	2	0.13	1.465	452	1000	ADA17_HUMAN Disintegrin and metalloproteinase domain-containing protein 17
P78536	ADAM17	K.CQEAIN#ATCK.G	2	-0.97	1.006	539	1000	ADA17_HUMAN Disintegrin and metalloproteinase domain-containing protein 17
P78536	ADAM17	R.EQQLESCACN#ETDNSCK.V	2	0.03	3.48	594	31.275	ADA17_HUMAN Disintegrin and metalloproteinase domain-containing protein 17
P78552	IL13RA1	R.NTSPDTN#YTLYYWHR.S	3	-0.16	2.462	157	19.777	I13R1_HUMAN Interleukin-13 receptor subunit alpha-1
Q02487	DSC2	R.AN#YTILK.G	2	0.99	1.75	392	1000	DSC2_HUMAN Desmocollin-2
Q02487	DSC2	K.AIN#DTAAR.L	2	0.1	2.961	629	1000	DSC2_HUMAN Desmocollin-2
Q03405	PLAUR	K.GN#STHGCSSEETFLIDCR.G	3	2.05	1.047	222	1000	UPAR_HUMAN Urokinase plasminogen activator surface receptor
Q04721	NOTCH2	R.DGYEPCVNEGMCVTYHN#GTGYCK.C	3	1.07	4.385	46	66.299	NOTC2_HUMAN Neurogenic locus notch homolog protein 2
Q04771	ACVR1	R.N#ITAQLPTK.G	2	-0.29	2.186	102	1000	ACVR1_HUMAN Activin receptor type-1
Q04912	MST1R	R.LDN#VTVAHM*GTMDGR.I	3	-0.31	1.003	458	1000	RON_HUMAN Macrophage-stimulating protein receptor
Q04912	MST1R	R.DPQGWVAGN#LSAR.G	2	-0.14	3.877	841	1000	RON_HUMAN Macrophage-stimulating protein receptor
Q06418	TYRO3	R.DLVPATN#YSLR.V	2	-0.28	1.007	293	1000	TYRO3_HUMAN Tyrosine-protein kinase receptor TYRO3
Q06418	TYRO3	R.AN#LTGWDPQK.D	2	1.32	1.956	380	1000	TYRO3_HUMAN Tyrosine-protein kinase receptor TYRO3
Q07699	SCN1B	R.VVWN#GSR.G	2	0.61	1.186	93	1000	SCN1B_HUMAN Sodium channel subunit beta-1
Q07954	LRP1	R.ELQGN#CSR.L	2	0.18	1.073	114	1000	LRP1_HUMAN Prolow-density lipoprotein receptor-related protein 1
Q07954	LRP1	K.WTGHN#VTVVQR.T	3	-0.99	1.307	1511	1000	LRP1_HUMAN Prolow-density lipoprotein receptor-related protein 1
Q07954	LRP1	K.DN#ATDSVPLR.T	2	0.73	1.17	2127	1000	LRP1_HUMAN Prolow-density lipoprotein receptor-related protein 1
Q07954	LRP1	R.AVN#SSCR.A	2	-0.19	1.775	2521	1000	LRP1_HUMAN Prolow-density lipoprotein receptor-related protein 1
Q07954	LRP1	R.DGTCIGN#SSR.C	2	0.33	3.62	2620	1000	LRP1_HUMAN Prolow-density lipoprotein receptor-related protein 1
Q07954	LRP1	K.CN#ASSQFLCSSGR.C	2	-0.87	2.381	2905	1000	LRP1_HUMAN Prolow-density lipoprotein receptor-related protein 1
Q07954	LRP1	R.TCVSN#CTASQFVCK.N	3	0.57	1.794	3333	1000	LRP1_HUMAN Prolow-density lipoprotein receptor-related protein 1
Q07954	LRP1	K.LTSCATN#ASICGDEAR.C	2	-0.02	3.295	3788	1000	LRP1_HUMAN Prolow-density lipoprotein receptor-related protein 1
Q07954	LRP1	R.GVTHLN#ISGLK.M	3	0.48	1.067	3953	1000	LRP1_HUMAN Prolow-density lipoprotein receptor-related protein 1
Q07954	LRP1	R.LN#GTDPIVAADSK.R	2	-0.53	2.605	4075	1000	LRP1_HUMAN Prolow-density lipoprotein receptor-related protein 1
Q07954	LRP1	K.QSGDVTCN#CTDGR.V	2	-0.15	1.305	4364	1000	LRP1_HUMAN Prolow-density lipoprotein receptor-related protein 1
Q07954	LRP1	R.INNGGCQDLCLLTHQGHVN#CSCR.G	4	-0.41	5.321	2502	107.529	LRP1_HUMAN Prolow-density lipoprotein receptor-related protein 1
Q07954	LRP1	R.MHLN#GSNVQVLHR.T	4	-0.29	5.731	3089	45.026	LRP1_HUMAN Prolow-density lipoprotein receptor-related protein 1
Q07954	LRP1	R.QPM*APNPCEANGGQGPCSHLCLINYN#R.T	3	2.4	3.72	1558	7.71	LRP1_HUMAN Prolow-density lipoprotein receptor-related protein 1
Q07954	LRP1	K.CTQQVCAGYCAN#NSTCTVNQGNQPQCR.C	3	-0.45	1.059	4278	0	LRP1_HUMAN Prolow-density lipoprotein receptor-related protein 1
Q08174	PCDH1	K.AN#DSDQGANAEIEYTFHQAPEVVR.R	3	-1.74	6.781	305	81.381	PCDH1_HUMAN Protocadherin-1
Q08334	IL10RB	K.GN#LTFTAQYLSYR.I	2	1.48	4.981	49	1000	I10R2_HUMAN Interleukin-10 receptor subunit beta
Q08380	LGALS3BP	R.DAGVVCTN#ETR.S	2	-0.52	1.581	125	1000	LG3BP_HUMAN Galectin-3-binding protein
Q08380	LGALS3BP	K.GLN#LTEDTYKPR.I	3	-0.42	1.866	398	1000	LG3BP_HUMAN Galectin-3-binding protein
Q08380	LGALS3BP	K.AAIPSALDTN#SSK.S	3	0.85	2.534	551	1000	LG3BP_HUMAN Galectin-3-binding protein
Q08380	LGALS3BP	R.ALGFEN#ATQALGR.A	2	0.84	2.797	69	1000	LG3BP_HUMAN Galectin-3-binding protein
Q08431	MFGE8	K.VAYSN#DSANWTEYQDPR.T	2	-0.12	2.171	325	44.278	MFGM_HUMAN Lactadherin
Q08722	CD47	K.M*DKSDAVSHTGN#YTCEVTELTR.E	4	-0.03	1.297	111	1000	CD47_HUMAN Leukocyte surface antigen CD47
Q08722	CD47	R.DIYTFDGALN#K.S	2	0.65	4.574	73	1000	CD47_HUMAN Leukocyte surface antigen CD47
Q12767	KIAA0195	R.DRN#LTN#CSSVMLPSNDDR.A	3	-1.73	3.282	1205	61.56	K0195_HUMAN Uncharacterized protein KIAA0195
Q12767	KIAA0195	R.DRN#LTN#CSSVMLPSNDDR.A	3	-1.73	3.282	1202	54.65	K0195_HUMAN Uncharacterized protein KIAA0195
Q12891	HYAL2	R.SVHGGVPQN#VSLWAHR.K	4	-0.15	1.364	103	1000	HYAL2_HUMAN Hyaluronidase-2
Q12913	PTPRJ	R.TPEQGSN#GTDGASQK.T	3	-0.02	1.258	104	1000	PTPRJ_HUMAN Receptor-type tyrosine-protein phosphatase eta
Q12913	PTPRJ	K.SN#DTAASEYK.Y	2	0.01	1.992	142	1000	PTPRJ_HUMAN Receptor-type tyrosine-protein phosphatase eta
Q12913	PTPRJ	K.VSDN#ESSSN#YTYK.I	2	1.23	1.274	391	1000	PTPRJ_HUMAN Receptor-type tyrosine-protein phosphatase eta
Q12913	PTPRJ	K.VSDN#ESSSN#YTYK.I	2	1.23	1.274	396	1000	PTPRJ_HUMAN Receptor-type tyrosine-protein phosphatase eta
Q12913	PTPRJ	K.GPN#GTEGASR.T	2	0	1.82	525	1000	PTPRJ_HUMAN Receptor-type tyrosine-protein phosphatase eta
Q12913	PTPRJ	K.AALSWSNGN#GTASCR.V	2	-0.24	2.322	231	48.874	PTPRJ_HUMAN Receptor-type tyrosine-protein phosphatase eta
Q12913	PTPRJ	R.NTCTTGITDPPPPDGSPN#ITSVSHNSVK.V	3	2.9	4.173	824	29.376	PTPRJ_HUMAN Receptor-type tyrosine-protein phosphatase eta
Q12913	PTPRJ	K.IHVAGETDSSNLN#VSEPR.A	3	-0.28	5.878	413	20.167	PTPRJ_HUMAN Receptor-type tyrosine-protein phosphatase eta
Q13308	PTK7	R.DGTPLSDGQSN#HTVSSK.E	3	0.09	1.436	175	1000	PTK7_HUMAN Inactive tyrosine-protein kinase 7
Q13308	PTK7	R.DDAGN#YTCIASNGPQGQIR.A	2	0.28	5.164	567	147.628	PTK7_HUMAN Inactive tyrosine-protein kinase 7
Q13308	PTK7	R.SAN#ASFNIK.W	2	0.29	1.98	116	97.748	PTK7_HUMAN Inactive tyrosine-protein kinase 7
Q13332	PTPRS	R.KVEAEALN#ATAIR.V	3	-0.44	4.673	733	1000	PTPRS_HUMAN Receptor-type tyrosine-protein phosphatase S
Q13332	PTPRS	R.GHPQILEAAGN#ASAGTVLLR.W	3	0.29	1.931	940	1000	PTPRS_HUMAN Receptor-type tyrosine-protein phosphatase S
Q13433	SLC39A6	K.TN#ESVSEPR.K	2	0.06	1.91	241	1000	S39A6_HUMAN Zinc transporter ZIP6
Q13433	SLC39A6	R.NTNENPQECFN#ASK.L	2	0.31	2.082	266	71.753	S39A6_HUMAN Zinc transporter ZIP6
Q13433	SLC39A6	R.YGEN#NSLSVEGFRK.L	3	0.44	2.805	67	30.835	S39A6_HUMAN Zinc transporter ZIP6
Q13444	ADAM15	K.YRDFQHLLN#R.T	4	1.36	1.718	237	1000	ADA15_HUMAN Disintegrin and metalloproteinase domain-containing protein 15
Q13641	TPBG	K.VLHN#GTLAELQGLPHIR.V	4	2.3	4.053	275	1000	TPBG_HUMAN Trophoblast glycoprotein
Q13641	TPBG	R.N#LTEVPTDLPAYVR.N	3	0.23	1.703	81	1000	TPBG_HUMAN Trophoblast glycoprotein
Q13641	TPBG	R.N#LTHLESLHLEDNALK.V	4	0.24	5.666	256	141.095	TPBG_HUMAN Trophoblast glycoprotein
Q13740	ALCAM	K.LGDCISEDSYPDGN#ITWYR.N	2	1.16	6.056	167	1000	CD166_HUMAN CD166 antigen
Q13740	ALCAM	K.EGDN#ITLK.C	3	0.29	1.005	265	1000	CD166_HUMAN CD166 antigen
Q13740	ALCAM	R.RN#ATGDYK.C	3	0.2	1.56	306	1000	CD166_HUMAN CD166 antigen
Q13740	ALCAM	R.N#ATVVWM*K.D	2	0.15	1.389	361	1000	CD166_HUMAN CD166 antigen
Q13740	ALCAM	K.IIISPEEN#VTLTCTAENQLER.T	2	3.34	5.292	480	109.943	CD166_HUMAN CD166 antigen
Q13740	ALCAM	R.TVNSLN#VSANENR.E	2	0.26	5.582	499	73.311	CD166_HUMAN CD166 antigen
Q13873	BMPR2	R.ISHEN#GTILCSK.G	3	-0.43	1.624	55	1000	BMPR2_HUMAN Bone morphogenetic protein receptor type-2
Q14108	SCARB2	K.ANIQFGDN#GTTISAVSNK.A	3	1.26	4.88	105	44.395	SCRB2_HUMAN Lysosome membrane protein 2
Q14118	DAG1	R.N#CSTITLQN#ITR.G	2	0.82	1.718	641	1000	DAG1_HUMAN Dystroglycan
Q14118	DAG1	R.N#CSTITLQN#ITR.G	2	0.82	1.718	649	1000	DAG1_HUMAN Dystroglycan
Q14126	DSG2	R.YVQN#GTYTVK.I	2	0.26	1.817	462	1000	DSG2_HUMAN Desmoglein-2
Q14126	DSG2	K.IN#ATDADEPNTLNSK.I	2	0.06	4.716	182	195.496	DSG2_HUMAN Desmoglein-2
Q14517	FAT1	R.GISYQMFGN#HSK.S	3	0.05	1.946	2325	1000	FAT1_HUMAN Protocadherin Fat 1
Q14956	GPNMB	K.NDRN#SSDETFLK.D	3	-0.26	3.756	249	35.777	GPNMB_HUMAN Transmembrane glycoprotein NMB
Q15043	SLC39A14	R.GN#VTQHVQGHR.N	3	0.23	1.558	77	1000	S39AE_HUMAN Zinc transporter ZIP14
Q15223	PVRL1	K.GVEAQN#R.T	2	-0.13	2.527	297	1000	PVRL1_HUMAN Poliovirus receptor-related protein 1
Q15223	PVRL1	K.STN#GSK.Q	2	0.06	1.224	72	1000	PVRL1_HUMAN Poliovirus receptor-related protein 1
Q15223	PVRL1	K.ADANPPATEYHWTTLN#GSLPK.G	3	0.73	3.335	286	65.232	PVRL1_HUMAN Poliovirus receptor-related protein 1
Q15223	PVRL1	R.NPN#GTVTVISR.Y	2	0.05	2.505	202	48.874	PVRL1_HUMAN Poliovirus receptor-related protein 1
Q15262	PTPRK	R.GHN#ESK.A	3	-0.2	2.032	436	1000	PTPRK_HUMAN Receptor-type tyrosine-protein phosphatase kappa
Q15262	PTPRK	R.LGDVEVNAGQN#ATFQCIATGR.D	2	-0.79	5.532	211	76.733	PTPRK_HUMAN Receptor-type tyrosine-protein phosphatase kappa
Q15262	PTPRK	K.APQHVVNHLPPYTN#VSLK.M	3	0.64	6.189	462	75.738	PTPRK_HUMAN Receptor-type tyrosine-protein phosphatase kappa
Q15303	ERBB4	K.FIN#CTK.I	2	0.37	1.003	358	1000	ERBB4_HUMAN Receptor tyrosine-protein kinase erbB-4
Q15303	ERBB4	K.MEDGLLTCHGPGPDN#CTK.C	3	2.72	1.579	576	1000	ERBB4_HUMAN Receptor tyrosine-protein kinase erbB-4
Q15751	HERC1	R.LGLGN#TSNK.K	2	-0.32	1.782	4170	13.38	HERC1_HUMAN Probable E3 ubiquitin-protein ligase HERC1
Q15758	SLC1A5	R.SYSTTYEERN#ITGTR.V	3	0.39	1.477	212	1000	AAAT_HUMAN Neutral amino acid transporter B(0)
Q15768	EFNB3	K.ENLPGDPTSN#ATSR.G	2	-0.09	1.806	210	47.045	EFNB3_HUMAN Ephrin-B3
Q15904	ATP6AP1	K.QPVSPVIHPPVSYN#DTAPR.I	3	0.12	1.58	261	1000	VAS1_HUMAN V-type proton ATPase subunit S1
Q16563	SYPL1	K.GQTEIQVNCPPAVTEN#K.T	2	0.67	5.542	71	84.609	SYPL1_HUMAN Synaptophysin-like protein 1
Q24JP5	TMEM132A	R.VQQVGHYPPAN#SSLSSR.S	3	-1.19	2.441	71	1000	T132A_HUMAN Transmembrane protein 132A
Q29983	MICA	R.VCEIHEDN#STR.S	3	-0.6	1.81	125	1000	MICA_HUMAN MHC class I polypeptide-related sequence A
Q29983	MICA	R.TVPPM*VN#VTR.S	2	-1.2	1.006	210	1000	MICA_HUMAN MHC class I polypeptide-related sequence A
Q29983	MICA	R.SEASEGN#ITVTCR.A	3	0.1	2.107	220	1000	MICA_HUMAN MHC class I polypeptide-related sequence A
Q29983	MICA	R.FTCYM*EHSGN#HSTHPVPSGK.V	4	-1.88	1.74	289	1000	MICA_HUMAN MHC class I polypeptide-related sequence A
Q3MIR4	TMEM30B	R.QGN#YSAGLPR.G	2	0.14	1.889	273	1000	CC50B_HUMAN Cell cycle control protein 50B
Q3MIR4	TMEM30B	K.ELEYDYTGDPGTGN#CSVCAAAGQGR.A	2	2.29	1.165	75	1000	CC50B_HUMAN Cell cycle control protein 50B
Q3MIR4	TMEM30B	R.VN#ITYNYPVR.A	2	1.73	2.376	286	97.748	CC50B_HUMAN Cell cycle control protein 50B
Q3MIR4	TMEM30B	R.RPVYELSPDPN#NTGFINQDFVVWM*R.T	3	-1.43	1.797	241	6.591	CC50B_HUMAN Cell cycle control protein 50B
Q3ZCQ3	FAM174B	R.ESRPPPGPGPGN#TTR.F	3	0.03	2.415	53	1000	F174B_HUMAN Membrane protein FAM174B
Q4KMQ2	ANO6	K.GNPYSDLGN#HTTCR.Y	3	-0.52	4.223	802	110.807	ANO6_HUMAN Anoctamin-6
Q4KMQ2	ANO6	K.NIN#GTDPIQK.Y	2	-1.41	3.865	493	48.874	ANO6_HUMAN Anoctamin-6
Q58DX5	NAALADL2	K.IKN#VTNQIALLK.L	3	-3.11	4.791	295	45.026	NADL2_HUMAN Inactive N-acetylated-alpha-linked acidic dipeptidase-like protein 2
Q58EX2	SDK2	R.VISAGGN#DSR.S	2	-1.31	3.399	577	1000	SDK2_HUMAN Protein sidekick-2
Q58EX2	SDK2	R.ISWEEYN#R.T	2	-0.41	1.994	936	1000	SDK2_HUMAN Protein sidekick-2
Q5BKX6	SLC45A4	K.APSN#STAWQAYNAGVK.M	2	2	4.25	547	150.768	S45A4_HUMAN Solute carrier family 45 member 4
Q5HYA8	TMEM67	R.CEPTFVN#TSR.S	2	0.51	1.283	179	1000	MKS3_HUMAN Meckelin
Q5SZK8	FREM2	K.GN#HSITQFTQADIDDM*K.I	3	-2.06	2.528	1716	1000	FREM2_HUMAN FRAS1-related extracellular matrix protein 2
Q5SZK8	FREM2	K.TGSICASENIN#DTLTR.Y	2	0.23	2.447	2427	17.009	FREM2_HUMAN FRAS1-related extracellular matrix protein 2
Q5VY80	RAET1L	K.TFLHYDCGN#K.T	3	0.07	1.854	68	1000	RET1L_HUMAN Retinoic acid early transcript 1L protein
Q5ZPR3	CD276	R.TALFPDLLAQGN#ASLR.L	2	0.4	2.783	104	1000	CD276_HUMAN CD276 antigen
Q5ZPR3	CD276	R.VVLGAN#GTYSCLVR.N	2	0.39	1.267	215	1000	CD276_HUMAN CD276 antigen
Q5ZPR3	CD276	R.DQGSAYAN#R.T	2	0.55	3.564	309	1000	CD276_HUMAN CD276 antigen
Q5ZPR3	CD276	K.QLVHSFAEGQDQGSAYAN#R.T	3	0.06	1.969	91	1000	CD276_HUMAN CD276 antigen
Q658P3	STEAP3	K.QVLAN#K.S	2	0.12	1.791	344	1000	STEA3_HUMAN Metalloreductase STEAP3
Q68CP4	HGSNAT	K.YPN#CTGGAAGYIDR.L	2	-0.22	3.195	461	1000	HGNAT_HUMAN Heparan-alpha-glucosaminide N-acetyltransferase
Q68D85	NCR3LG1	R.SN#FTLTAAR.H	2	0.05	2.705	242	1000	NR3L1_HUMAN Natural cytotoxicity triggering receptor 3 ligand 1
Q6EMK4	VASN	R.LHEITN#ETFR.G	3	-0.29	2.94	117	1000	VASN_HUMAN Vasorin
Q6P4Q7	CNNM4	R.GN#TSGVLVVLTK.F	2	0.58	5.121	127	1000	CNNM4_HUMAN Metal transporter CNNM4
Q6PCB8	EMB	K.YVIN#GTYAN#ETK.L	2	0.11	1.641	213	1000	EMB_HUMAN Embigin
Q6PCB8	EMB	K.YVIN#GTYAN#ETK.L	2	0.11	1.641	218	1000	EMB_HUMAN Embigin
Q6UXD5	SEZ6L2	R.LLAN#SSM*LGEGQVLR.S	3	0.21	1.683	247	1000	SE6L2_HUMAN Seizure 6-like protein 2
Q6UXD5	SEZ6L2	R.IVSPEPGGAVGPN#LTCR.W	2	-0.11	1.262	373	1000	SE6L2_HUMAN Seizure 6-like protein 2
Q6UXD5	SEZ6L2	K.EVPRN#DTCPELPPPEWGWR.T	3	1.25	4.321	641	1000	SE6L2_HUMAN Seizure 6-like protein 2
Q6UXG2	KIAA1324	K.TN#NSTCQPCPYGSYSN#GSDCTR.C	2	-1.24	3.139	404	114.186	K1324_HUMAN UPF0577 protein KIAA1324
Q6UXG2	KIAA1324	K.TN#NSTCQPCPYGSYSN#GSDCTR.C	2	-1.24	3.139	390	12.218	K1324_HUMAN UPF0577 protein KIAA1324
Q6UXG2	KIAA1324	K.TNN#STCQPCPYGSYSN#GSDCTR.C	2	-0.47	2.606	391	12.218	K1324_HUMAN UPF0577 protein KIAA1324
Q6UXI9	NPNT	K.GN#GTILK.G	2	0.27	1.278	273	1000	NPNT_HUMAN Nephronectin
Q6YHK3	CD109	R.TQDEILFSN#STR.L	2	2.48	2.156	118	1000	CD109_HUMAN CD109 antigen
Q6YHK3	CD109	R.N#YTEYWSGSNSGNQK.M	2	-0.17	2.977	397	120.756	CD109_HUMAN CD109 antigen
Q6ZN44	UNC5A	R.LADTAN#YTCVAK.N	2	0	1.655	218	1000	UNC5A_HUMAN Netrin receptor UNC5A
Q6ZNA5	FRRS1	R.RN#ITLPGVK.N	3	-0.35	3.05	308	1000	FRRS1_HUMAN Ferric-chelate reductase 1
Q6ZQN7	SLCO4C1	K.VYYN#CSCIER.K	2	4.48	1.3	544	1000	SO4C1_HUMAN Solute carrier organic anion transporter family member 4C1
Q6ZUK4	TMEM26	R.KEDFN#QTLTSNEQTSR.A	3	-0.31	4.046	110	97.602	TMM26_HUMAN Transmembrane protein 26
Q7Z3C6	ATG9A	K.MVN#HSLHPTEPVK.V	3	-0.74	1.57	99	1000	ATG9A_HUMAN Autophagy-related protein 9A
Q7Z4F1	LRP10	R.GFN#ATYHVR.G	2	-1.43	1.336	299	1000	LRP10_HUMAN Low-density lipoprotein receptor-related protein 10
Q7Z5N4	SDK1	R.GN#HTQSALLAGLR.K	3	-0.01	1.907	1333	1000	SDK1_HUMAN Protein sidekick-1
Q7Z5N4	SDK1	K.TVN#SSSTSTMCELTHLKK.Y	4	2.43	1.424	1654	1000	SDK1_HUMAN Protein sidekick-1
Q7Z5N4	SDK1	R.LKN#LTSHTK.Y	3	0.19	1.04	1767	1000	SDK1_HUMAN Protein sidekick-1
Q86SQ4	GPR126	K.GFN#ASYIR.V	2	0.03	1.178	143	1000	GP126_HUMAN G-protein coupled receptor 126
Q86SQ4	GPR126	K.IDLN#STSHVN#ITTR.N	3	0.07	1.788	667	1000	GP126_HUMAN G-protein coupled receptor 126
Q86SQ4	GPR126	K.IDLN#STSHVN#ITTR.N	3	0.07	1.788	673	1000	GP126_HUMAN G-protein coupled receptor 126
Q86SQ4	GPR126	K.SFGGWN#TSGCVAHR.D	3	-0.3	2.598	818	1000	GP126_HUMAN G-protein coupled receptor 126
Q86SQ4	GPR126	K.NN#ESLDEGLR.L	2	-0.28	2.635	505	24.437	GP126_HUMAN G-protein coupled receptor 126
Q86UF1	TSPAN33	K.DWSQNM*YFN#CSEDNPSR.E	3	1.58	1.355	172	11.069	TSN33_HUMAN Tetraspanin-33
Q86UK0	ABCA12	K.EFCN#LSLSER.S	2	1.18	2.252	623	1000	ABCAC_HUMAN ATP-binding cassette sub-family A member 12
Q86WC4	OSTM1	K.MDN#ISR.A	2	0.22	1.017	128	1000	OSTM1_HUMAN Osteopetrosis-associated transmembrane protein 1
Q86WC4	OSTM1	R.AAGN#TSESQSCAR.S	3	-0.24	1.738	135	1000	OSTM1_HUMAN Osteopetrosis-associated transmembrane protein 1
Q86WC4	OSTM1	K.N#YSEVCK.N	2	0.6	1.515	216	1000	OSTM1_HUMAN Osteopetrosis-associated transmembrane protein 1
Q86WK7	AMIGO3	R.GVFVN#ASGLR.L	2	0.22	1.06	107	1000	AMGO3_HUMAN Amphoterin-induced protein 3
Q86XS8	RNF130	R.GN#CTFK.E	2	-0.31	2.496	112	1000	GOLI_HUMAN E3 ubiquitin-protein ligase RNF130
Q8IV08	PLD3	R.DN#HTHSDIQVK.L	3	-1.6	3.74	387	1000	PLD3_HUMAN Phospholipase D3
Q8IVY1	C1orf210	-.MNETN#K.T	2	-1.21	1.97	5	73.311	CA210_HUMAN Putative uncharacterized protein C1orf210
Q8IWA5	SLC44A2	K.GVLMVGN#ETTYEDGHGSRKN#ITDLVEGAK.K	4	2.06	4.43	187	1000	CTL2_HUMAN Choline transporter-like protein 2
Q8IWA5	SLC44A2	R.KN#ITDLVEGAK.K	3	-0.14	2.289	200	1000	CTL2_HUMAN Choline transporter-like protein 2
Q8IWA5	SLC44A2	K.TCNPETFPSSN#ESR.Q	2	0.12	3.781	417	150.768	CTL2_HUMAN Choline transporter-like protein 2
Q8IWT6	LRRC8A	K.DSCN#DSFR.G	2	-0.07	1.499	66	1000	LRC8A_HUMAN Leucine-rich repeat-containing protein 8A
Q8IWU5	SULF2	R.FYN#YTLCR.N	2	0.03	1.391	171	1000	SULF2_HUMAN Extracellular sulfatase Sulf-2
Q8IWU5	SULF2	R.LFPN#ASQHITPSYNYAPNPDK.H	3	0.36	3.945	241	50.194	SULF2_HUMAN Extracellular sulfatase Sulf-2
Q8IZA0	KIAA0319L	K.VIVEGQNAHGEGYVN#VTVKPEPR.K	4	0.01	4.575	395	33.19	K319L_HUMAN Dyslexia-associated protein KIAA0319-like protein
Q8N0Z9	VSIG10	R.N#LTQPEVIIQPSSR.H	3	-0.52	1.469	347	1000	VSI10_HUMAN V-set and immunoglobulin domain-containing protein 10
Q8N0Z9	VSIG10	R.N#NSEPVFLLSSN#SSLRPAEPR.F	3	-1.17	4.286	70	89.08	VSI10_HUMAN V-set and immunoglobulin domain-containing protein 10
Q8N0Z9	VSIG10	R.N#NSEPVFLLSSN#SSLRPAEPR.F	3	-1.17	4.286	59	24.437	VSI10_HUMAN V-set and immunoglobulin domain-containing protein 10
Q8N271	PROM2	R.KN#ISIHQAYQQCK.E	4	0.05	2.811	540	1000	PROM2_HUMAN Prominin-2
Q8N271	PROM2	K.LN#LSVR.A	2	0.28	1.23	684	1000	PROM2_HUMAN Prominin-2
Q8N441	FGFRL1	R.HN#STIDVGGQK.F	3	-1.09	2.753	293	1000	FGRL1_HUMAN Fibroblast growth factor receptor-like 1
Q8N697	SLC15A4	R.LLN#CTAPGPDAAAR.C	2	-0.06	1.189	140	1000	S15A4_HUMAN Solute carrier family 15 member 4
Q8N6C5	IGSF1	K.GIGN#YSCSYR.L	2	-0.11	1.23	1223	1000	IGSF1_HUMAN Immunoglobulin superfamily member 1
Q8N6C5	IGSF1	R.MEDKDEGN#YSCR.T	3	0.17	1.253	747	1000	IGSF1_HUMAN Immunoglobulin superfamily member 1
Q8N8Z6	DCBLD1	R.ASSSWQSVN#ESGDQVHWSPGQAR.L	3	1	1.057	277	1000	DCBD1_HUMAN Discoidin, CUB and LCCL domain-containing protein 1
Q8N8Z6	DCBLD1	K.NYPGTYPN#HTVCEK.T	3	0.33	3.585	64	23.354	DCBD1_HUMAN Discoidin, CUB and LCCL domain-containing protein 1
Q8NAC3	IL17RC	K.GHPNLCVQVN#SSEK.L	3	-4.23	3.377	443	62.659	I17RC_HUMAN Interleukin-17 receptor C
Q8NBJ4	GOLM1	K.AVLVNN#ITTGER.L	2	-0.03	2.936	109	24.437	GOLM1_HUMAN Golgi membrane protein 1
Q8NBJ9	SIDT2	R.TYVDEVNSELVNIYTFN#HTVTR.N	3	0.14	4.321	54	23.523	SIDT2_HUMAN SID1 transmembrane family member 2
Q8NBN3	TMEM87A	K.QEAKEN#GTNLTFIGDK.T	3	0.01	2.385	157	7.971	TM87A_HUMAN Transmembrane protein 87A
Q8NC42	RNF149	R.RN#ASAVVLYNEER.Y	3	-0.27	4.739	131	163.897	RN149_HUMAN E3 ubiquitin-protein ligase RNF149
Q8NFZ8	CADM4	R.QTLFFN#GTR.A	2	0.07	1.138	67	1000	CADM4_HUMAN Cell adhesion molecule 4
Q8NFZ8	CADM4	R.WNRGN#ESLPER.A	2	0.53	2.793	262	24.243	CADM4_HUMAN Cell adhesion molecule 4
Q8TB96	ITFG1	K.N#TSGSNQQAFLLENVPCN#NASCEEARR.M	3	3.09	2.593	353	47.808	TIP_HUMAN T-cell immunomodulatory protein
Q8TCT7	SPPL2B	R.GN#CTFYEK.V	2	2.06	1.659	97	1000	SPP2B_HUMAN Signal peptide peptidase-like 2B
Q8TCT8	SPPL2A	R.DM*N#QTLGDN#ITVK.M	2	0.09	1.068	149	1000	SPP2A_HUMAN Signal peptide peptidase-like 2A
Q8TCT8	SPPL2A	R.DM*N#QTLGDN#ITVK.M	2	0.09	1.068	155	1000	SPP2A_HUMAN Signal peptide peptidase-like 2A
Q8WTR4	GDPD5	R.RPASM*LN#WTTLQR.L	3	1.02	2.396	301	1000	GDPD5_HUMAN Glycerophosphodiester phosphodiesterase domain-containing protein 5
Q8WWB7	C1orf85	R.TFAN#GSLAFR.V	2	0.35	1.244	187	1000	NCUG1_HUMAN Lysosomal protein NCU-G1
Q8WWZ7	ABCA5	K.TN#VSLWK.E	2	1.68	2.13	190	1000	ABCA5_HUMAN ATP-binding cassette sub-family A member 5
Q92508	PIEZO1	K.RELYN#GTADITLR.F	3	-0.16	2.005	2294	1000	PIEZ1_HUMAN Piezo-type mechanosensitive ion channel component 1
Q92508	PIEZO1	K.HM*LALAPN#STAR.R	3	0.1	2.336	2331	1000	PIEZ1_HUMAN Piezo-type mechanosensitive ion channel component 1
Q92542	NCSTN	R.TSLELWM*HTDPVSQKN#ESVR.N	4	-0.34	1.829	387	1000	NICA_HUMAN Nicastrin
Q92542	NCSTN	R.RPN#QSQPLPPSSLQR.F	3	-0.05	2.158	417	1000	NICA_HUMAN Nicastrin
Q92542	NCSTN	R.ALYELAGGTN#FSDTVQADPQTVTR.L	2	0.9	3.757	506	1000	NICA_HUMAN Nicastrin
Q92542	NCSTN	K.DLYEYSWVQGPLHSN#ETDRLPR.C	4	-0.93	2.633	612	1000	NICA_HUMAN Nicastrin
Q92673	SORL1	R.SDEYN#CSSGMCIR.S	2	-0.6	2.41	1164	1000	SORL_HUMAN Sortilin-related receptor
Q92673	SORL1	R.CPN#GTCIPSSK.H	2	0.71	1.462	1246	1000	SORL_HUMAN Sortilin-related receptor
Q92673	SORL1	K.MGHN#YTFTVQAR.C	3	1.53	2.223	2092	1000	SORL_HUMAN Sortilin-related receptor
Q92673	SORL1	K.SRN#STVEYTLNK.L	3	-0.75	2.863	1986	58.433	SORL_HUMAN Sortilin-related receptor
Q92673	SORL1	R.TPHATCFNGEDFDRPVVVSN#CSCTR.E	4	0.08	3.255	674	37.327	SORL_HUMAN Sortilin-related receptor
Q92673	SORL1	K.N#NTCVK.Q	2	0.92	1.788	1068	9.34	SORL_HUMAN Sortilin-related receptor
Q92729	PTPRU	R.APADLPHGSYLM*VN#TSQHAPGQR.A	4	0.8	1.547	75	1000	PTPRU_HUMAN Receptor-type tyrosine-protein phosphatase U
Q92823	NRCAM	K.EIVN#GSR.S	2	0.21	2.322	1115	1000	NRCAM_HUMAN Neuronal cell adhesion molecule
Q92823	NRCAM	R.FN#HTQTIQQK.Q	3	0.8	1.97	223	1000	NRCAM_HUMAN Neuronal cell adhesion molecule
Q92823	NRCAM	K.NLN#FSTR.Y	2	1.1	1.85	1019	48.874	NRCAM_HUMAN Neuronal cell adhesion molecule
Q92823	NRCAM	R.ERPPTFLTPEGN#ASNK.E	3	0.93	6.171	276	45.026	NRCAM_HUMAN Neuronal cell adhesion molecule
Q92823	NRCAM	R.VNVVN#STLAEVHWDPVPLK.S	3	3.13	5.116	858	28.934	NRCAM_HUMAN Neuronal cell adhesion molecule
Q92859	NEO1	R.GSSVILN#CSAYSEPSPK.I	2	0.99	2.61	73	1000	NEO1_HUMAN Neogenin
Q92887	ABCC2	K.IFN#STDYPASQR.D	2	-0.21	2.841	1011	1000	MRP2_HUMAN Canalicular multispecific organic anion transporter 1
Q96AP7	ESAM	R.LQGVPHVGAN#VTLSCQSPR.S	3	0.51	1.542	169	1000	ESAM_HUMAN Endothelial cell-selective adhesion molecule
Q96BD0	SLCO4A1	R.DCSCIPQN#LSSGFGHATAGK.C	3	-0.99	2.884	557	1000	SO4A1_HUMAN Solute carrier organic anion transporter family member 4A1
Q96F46	IL17RA	R.SN#VTLTLR.N	2	-0.18	1.247	265	1000	I17RA_HUMAN Interleukin-17 receptor A
Q96F46	IL17RA	R.ALVCSQPGLN#CTVK.N	2	1.11	1.634	49	1000	I17RA_HUMAN Interleukin-17 receptor A
Q96F46	IL17RA	K.N#STCLDDSWIHPR.N	3	0.92	3.58	54	1000	I17RA_HUMAN Interleukin-17 receptor A
Q96GX1	TCTN2	R.M*NN#VTTLHLWQSAGR.G	3	0.35	2.412	455	6.591	TECT2_HUMAN Tectonic-2
Q96HA4	C1orf159	R.CGN#GTLPAYN#GSECR.S	2	0.02	1.653	104	1000	CA159_HUMAN Uncharacterized protein C1orf159
Q96HA4	C1orf159	R.CGN#GTLPAYN#GSECR.S	2	0.02	1.653	111	1000	CA159_HUMAN Uncharacterized protein C1orf159
Q96HA4	C1orf159	R.SFAGPGAPFPM*N#R.S	2	0.09	1.293	128	1000	CA159_HUMAN Uncharacterized protein C1orf159
Q96NT5	SLC46A1	R.FSADLGYN#GTR.Q	2	0.01	1.688	58	1000	PCFT_HUMAN Proton-coupled folate transporter
Q96NY8	PVRL4	K.CLSEGQPPPSYN#WTR.L	2	0.48	2.06	281	1000	PVRL4_HUMAN Poliovirus receptor-related protein 4
Q96PD2	DCBLD2	K.YCGLGLQM*N#HSIESK.G	3	4.24	3.578	155	1000	DCBD2_HUMAN Discoidin, CUB and LCCL domain-containing protein 2
Q96QE2	SLC2A13	R.ITFKPIAPSGQN#ATCTR.Y	3	0.33	1.004	433	1000	MYCT_HUMAN Proton myo-inositol cotransporter
Q96RD7	PANX1	K.SGILRN#DSTVPDQFQCK.L	4	1.21	1.469	255	1000	PANX1_HUMAN Pannexin-1
Q96T83	SLC9A7	R.AFSTLLVN#VSGK.F	2	1.97	3.13	145	1000	SL9A7_HUMAN Sodium/hydrogen exchanger 7
Q99500	S1PR3	R.LQPVRGN#ETLR.E	3	-0.69	2.142	15	1000	S1PR3_HUMAN Sphingosine 1-phosphate receptor 3
Q99523	SORT1	K.DITDLIN#NTFIR.T	2	0.01	4.311	162	24.437	SORT_HUMAN Sortilin
Q99523	SORT1	K.LAN#NTHQHVFDDLR.G	2	0.08	1.476	98	24.437	SORT_HUMAN Sortilin
Q99571	P2RX4	R.CVAFN#GSVK.T	2	-1.14	3.491	153	1000	P2RX4_HUMAN P2X purinoceptor 4
Q99571	P2RX4	K.GVAVTN#TSK.L	2	0.13	1.07	75	1000	P2RX4_HUMAN P2X purinoceptor 4
Q99650	OSMR	K.NVGPN#TTSTVISTDAFRPGVR.Y	3	0.72	3.184	580	22.237	OSMR_HUMAN Oncostatin-M-specific receptor subunit beta
Q99808	SLC29A1	R.LDMSQN#VSLVTAELSK.D	3	-1.19	2.391	48	1000	S29A1_HUMAN Equilibrative nucleoside transporter 1
Q99985	SEMA3C	R.VIQTFN#R.T	2	1.31	1.706	123	1000	SEM3C_HUMAN Semaphorin-3C
Q9BRN9	TM2D3	R.QRYPAN#CTVR.D	3	-1.66	1.113	157	1000	TM2D3_HUMAN TM2 domain-containing protein 3
Q9BRN9	TM2D3	K.NFIIN#M*TCR.F	2	-0.58	2.14	122	44.278	TM2D3_HUMAN TM2 domain-containing protein 3
Q9BTN0	LRFN3	R.LLGN#SSR.A	2	-0.95	1.446	339	1000	LRFN3_HUMAN Leucine-rich repeat and fibronectin type-III domain-containing protein 3
Q9BX74	TM2D1	K.DSSGN#ETHFTGNEVGFFKPISCR.N	4	3.58	2.104	96	7.279	TM2D1_HUMAN TM2 domain-containing protein 1
Q9BXC0	HCAR1	-.MYN#GSCCR.I	2	-2.03	2.471	3	1000	HCAR1_HUMAN Hydroxycarboxylic acid receptor 1
Q9BXP2	SLC12A9	R.LTPRPGPN#GSSLPPR.F	3	-0.12	2.566	228	1000	S12A9_HUMAN Solute carrier family 12 member 9
Q9BXP2	SLC12A9	R.FGHFTGFN#SSTLK.D	3	1.3	1.56	243	1000	S12A9_HUMAN Solute carrier family 12 member 9
Q9BY67	CADM1	R.FQLLN#FSSSELK.V	2	1.21	4.121	101	1000	CADM1_HUMAN Cell adhesion molecule 1
Q9BY67	CADM1	K.VSLTN#VSISDEGR.Y	2	0.08	3.968	113	1000	CADM1_HUMAN Cell adhesion molecule 1
Q9BY67	CADM1	K.DTAVEGEEIEVN#CTAM*ASKPATTIR.W	3	1.89	4.816	165	1000	CADM1_HUMAN Cell adhesion molecule 1
Q9BY67	CADM1	K.DVTVIEGEVATISCQVN#K.S	2	2.69	1.106	67	1000	CADM1_HUMAN Cell adhesion molecule 1
Q9BY67	CADM1	R.VDDEMPQHAVLSGPNLFINNLN#KTDN#GTYR.C	4	0.52	6.601	308	43.066	CADM1_HUMAN Cell adhesion molecule 1
Q9BY67	CADM1	R.VDDEMPQHAVLSGPNLFINNLN#KTDN#GTYR.C	4	0.52	6.601	304	13.38	CADM1_HUMAN Cell adhesion molecule 1
Q9BZC7	ABCA2	K.SPAN#GSLGPTLN#LSSGESR.L	2	-0.34	1.095	1549	1000	ABCA2_HUMAN ATP-binding cassette sub-family A member 2
Q9BZC7	ABCA2	K.SPAN#GSLGPTLN#LSSGESR.L	2	-0.34	1.095	1557	1000	ABCA2_HUMAN ATP-binding cassette sub-family A member 2
Q9BZC7	ABCA2	R.FLTQN#LSLPN#STAQALLAAR.V	3	0.27	3.791	168	1000	ABCA2_HUMAN ATP-binding cassette sub-family A member 2
Q9BZC7	ABCA2	R.FLTQN#LSLPN#STAQALLAAR.V	3	0.27	3.791	173	1000	ABCA2_HUMAN ATP-binding cassette sub-family A member 2
Q9C0C4	SEMA4C	R.DPYCAWSVN#TSR.C	2	-0.72	1.249	522	1000	SEM4C_HUMAN Semaphorin-4C
Q9C0C4	SEMA4C	K.GKN#N#QTECFNFIR.F	3	0.81	3.084	106	26.105	SEM4C_HUMAN Semaphorin-4C
Q9H0X4	ITFG3	K.SDPHWESMLN#ATTR.R	3	-0.35	2.055	314	1000	ITFG3_HUMAN Protein ITFG3
Q9H0X4	ITFG3	R.YKPDTLAVAVEN#GTGTDR.Q	3	0.07	3.784	389	1000	ITFG3_HUMAN Protein ITFG3
Q9H0X4	ITFG3	K.NTN#SSNN#FSR.S	2	-4.56	3.857	116	48.874	ITFG3_HUMAN Protein ITFG3
Q9H0X4	ITFG3	K.NTN#SSNN#FSR.S	2	-4.56	3.857	120	24.437	ITFG3_HUMAN Protein ITFG3
Q9H1U4	MEGF9	R.CN#QTTGQCECRPGYQGLHCETCK.E	4	0.07	2.1	218	1000	MEGF9_HUMAN Multiple epidermal growth factor-like domains protein 9
Q9H1U4	MEGF9	K.DGYIGPNCN#K.C	2	-0.36	1.59	384	17.009	MEGF9_HUMAN Multiple epidermal growth factor-like domains protein 9
Q9H1U4	MEGF9	K.NGCLPCQCNN#R.S	2	-2.97	2.561	305	0	MEGF9_HUMAN Multiple epidermal growth factor-like domains protein 9
Q9H2X9	SLC12A5	K.LAWEGN#ETVTTR.L	2	-0.55	2.253	333	1000	S12A5_HUMAN Solute carrier family 12 member 5
Q9H6X2	ANTXR1	K.DFN#ETQLAR.I	2	-2.88	1.109	184	1000	ANTR1_HUMAN Anthrax toxin receptor 1
Q9H8M5	CNNM2	R.VYGQNINN#ETWSR.I	2	0.35	3.692	112	24.437	CNNM2_HUMAN Metal transporter CNNM2
Q9HBA0	TRPV4	K.VCNEDQTN#CTVPTYPSCR.D	2	2.13	2.689	651	17.25	TRPV4_HUMAN Transient receptor potential cation channel subfamily V member 4
Q9HC56	PCDH9	K.SN#VSFDR.E	2	-0.68	2.281	630	1000	PCDH9_HUMAN Protocadherin-9
Q9HCN3	TMEM8A	R.DCVSN#GSLGCPVR.L	2	0.4	1.123	232	1000	TMM8A_HUMAN Transmembrane protein 8A
Q9HCN3	TMEM8A	R.GWSCTDN#STAQTVAQQR.A	2	0.76	2.345	535	1000	TMM8A_HUMAN Transmembrane protein 8A
Q9HCU4	CELSR2	R.FGSVLGN#YSCAAQGTQGGSKK.S	4	1.87	1.592	1501	1000	CELR2_HUMAN Cadherin EGF LAG seven-pass G-type receptor 2
Q9HCU4	CELSR2	R.LHGLHLSN#ITVGGIPGPAGGVAR.G	3	2.17	2.063	1741	1000	CELR2_HUMAN Cadherin EGF LAG seven-pass G-type receptor 2
Q9HCU4	CELSR2	K.GFDPDCN#KTSGECHCK.E	4	0.34	2.066	1900	1000	CELR2_HUMAN Cadherin EGF LAG seven-pass G-type receptor 2
Q9HCU4	CELSR2	R.LQRN#ESGLDSGR.S	3	-0.09	1.206	2043	1000	CELR2_HUMAN Cadherin EGF LAG seven-pass G-type receptor 2
Q9HCU4	CELSR2	R.N#ATQHTAGYFGSDVK.V	3	-0.34	2.306	2061	1000	CELR2_HUMAN Cadherin EGF LAG seven-pass G-type receptor 2
Q9HCU4	CELSR2	R.GNELSLVLLN#ASTGELK.L	2	0.03	6.185	1076	171.488	CELR2_HUMAN Cadherin EGF LAG seven-pass G-type receptor 2
Q9HCU4	CELSR2	R.HIDM*ADFIANN#GTVPGCPAK.K	3	0.69	4.344	1565	17.009	CELR2_HUMAN Cadherin EGF LAG seven-pass G-type receptor 2
Q9NPH3	IL1RAP	R.N#TTYCSK.V	2	-0.46	1.899	118	1000	IL1AP_HUMAN Interleukin-1 receptor accessory protein
Q9NPR2	SEMA4B	R.KIN#SSLQLPDR.V	3	-0.03	1.98	405	1000	SEM4B_HUMAN Semaphorin-4B
Q9NQ34	TMEM9B	K.ENSGHIYNKN#ISQK.D	4	-0.8	2.321	60	11.015	TMM9B_HUMAN Transmembrane protein 9B
Q9NT99	LRRC4B	K.ETVPSN#TTCCAR.C	2	-0.24	3.334	333	1000	LRC4B_HUMAN Leucine-rich repeat-containing protein 4B
Q9NUN5	LMBRD1	K.GN#STLSVPK.R	2	-0.56	1.649	457	1000	LMBD1_HUMAN Probable lysosomal cobalamin transporter
Q9NUN5	LMBRD1	K.NQN#GTFK.D	2	0.57	2.968	78	48.874	LMBD1_HUMAN Probable lysosomal cobalamin transporter
Q9NUN5	LMBRD1	K.DWANAN#VSR.Q	2	-3.32	3.668	88	48.874	LMBD1_HUMAN Probable lysosomal cobalamin transporter
Q9NV96	TMEM30A	R.YSLN#VTYNYPVHYFDGR.K	3	0.4	5.764	294	47.045	CC50A_HUMAN Cell cycle control protein 50A
Q9NWD8	TMEM248	K.HLTN#DTTTPESTMTSGQAR.A	3	0.04	1.585	80	1000	TM248_HUMAN Transmembrane protein 248
Q9NXL6	SIDT1	K.EN#QTWNLQR.K	2	0.67	2.398	282	97.748	SIDT1_HUMAN SID1 transmembrane family member 1
Q9NY35	CLDND1	R.SPVQEN#SSDLNK.S	2	0.08	2.377	42	100.207	CLDN1_HUMAN Claudin domain-containing protein 1
Q9NY47	CACNA2D2	K.DLN#ASDNNTEFLK.N	2	-0.21	2.41	696	76.733	CA2D2_HUMAN Voltage-dependent calcium channel subunit alpha-2/delta-2
Q9NYQ6	CELSR1	K.DIGN#YSCAAQGTQTGSK.K	3	-0.06	2.311	1576	1000	CELR1_HUMAN Cadherin EGF LAG seven-pass G-type receptor 1
Q9NYQ6	CELSR1	K.LSRN#ETQVDGAR.A	3	-0.13	1.687	2122	1000	CELR1_HUMAN Cadherin EGF LAG seven-pass G-type receptor 1
Q9NYQ6	CELSR1	K.FN#FTGAR.V	2	0.23	1.415	2257	1000	CELR1_HUMAN Cadherin EGF LAG seven-pass G-type receptor 1
Q9NYQ6	CELSR1	K.GFDPDCN#KTNGQCQCK.E	3	0.26	3.334	1979	33.657	CELR1_HUMAN Cadherin EGF LAG seven-pass G-type receptor 1
Q9NYQ7	CELSR3	K.GFDPNCN#K.T	2	0.2	1.598	2053	30.835	CELR3_HUMAN Cadherin EGF LAG seven-pass G-type receptor 3
Q9P055	JKAMP	K.N#GSTEIYGECGVCPR.G	2	0.4	2.663	37	1000	JKAMP_HUMAN JNK1/MAPK8-associated membrane protein
Q9P0K1	ADAM22	R.TLN#CSGGHVK.L	3	-0.68	3.306	634	1000	ADA22_HUMAN Disintegrin and metalloproteinase domain-containing protein 22
Q9P0K1	ADAM22	R.ETCSGN#SSQCAPNIHK.M	3	-1.82	1.335	519	86.833	ADA22_HUMAN Disintegrin and metalloproteinase domain-containing protein 22
Q9P0T7	TMEM9	R.N#ISGHIYNQNVSQK.D	2	0.47	5.273	38	147.628	TMEM9_HUMAN Transmembrane protein 9
Q9P0T7	TMEM9	R.N#ISGHIYNQN#VSQK.D	2	0.01	2.143	47	30.835	TMEM9_HUMAN Transmembrane protein 9
Q9P2B2	PTGFRN	K.N#VSVAEGK.E	2	0.08	1.722	286	1000	FPRP_HUMAN Prostaglandin F2 receptor negative regulator
Q9P2B2	PTGFRN	K.ELDLTCN#ITTDR.A	2	0.12	1.498	300	1000	FPRP_HUMAN Prostaglandin F2 receptor negative regulator
Q9P2B2	PTGFRN	R.YSVLIM*AEKPVGDLSSPN#ETK.Y	4	0.95	3.202	600	1000	FPRP_HUMAN Prostaglandin F2 receptor negative regulator
Q9P2B2	PTGFRN	K.LEN#WTDASR.V	2	0.3	1.376	618	1000	FPRP_HUMAN Prostaglandin F2 receptor negative regulator
Q9P2B2	PTGFRN	K.ENSGYYYCHVSLWAPGHN#R.S	4	1.44	4.564	383	118.757	FPRP_HUMAN Prostaglandin F2 receptor negative regulator
Q9P2B2	PTGFRN	K.QRN#NSWVK.S	2	0.46	2.059	525	24.437	FPRP_HUMAN Prostaglandin F2 receptor negative regulator
Q9P2C4	TMEM181	K.GM*N#FTWK.T	2	-0.96	1.063	299	1000	TM181_HUMAN Transmembrane protein 181
Q9UBG0	MRC2	R.TSN#ISKPGTLER.G	3	-0.51	1.377	140	1000	MRC2_HUMAN C-type mannose receptor 2
Q9UBG0	MRC2	K.KPN#ATAEPTPPDR.W	3	-0.9	1.167	364	1000	MRC2_HUMAN C-type mannose receptor 2
Q9UBG0	MRC2	K.N#CTSFR.A	2	0.4	2.09	634	1000	MRC2_HUMAN C-type mannose receptor 2
Q9UBG0	MRC2	R.VTPACN#TSLPAQR.W	2	1.73	1.396	69	1000	MRC2_HUMAN C-type mannose receptor 2
Q9UGT4	SUSD2	K.SELVN#ETR.W	2	0.53	1.271	162	1000	SUSD2_HUMAN Sushi domain-containing protein 2
Q9UGT4	SUSD2	R.AQPGTMSN#GTETR.G	2	0.01	1.054	494	1000	SUSD2_HUMAN Sushi domain-containing protein 2
Q9UHN6	TMEM2	R.QN#GSLSK.I	2	-0.05	2.868	1092	1000	TMEM2_HUMAN Transmembrane protein 2
Q9UHN6	TMEM2	R.FDTHEYRN#ESR.R	4	1.15	1.55	292	1000	TMEM2_HUMAN Transmembrane protein 2
Q9UHN6	TMEM2	K.TTN#SSAADPR.E	2	-0.26	2.053	739	1000	TMEM2_HUMAN Transmembrane protein 2
Q9UHN6	TMEM2	R.HPSCVN#VSK.W	3	-0.49	1.275	980	1000	TMEM2_HUMAN Transmembrane protein 2
Q9UHW9	SLC12A6	K.EINN#MTVPSK.L	2	0.18	2.43	398	24.437	S12A6_HUMAN Solute carrier family 12 member 6
Q9UIG8	SLCO3A1	R.DVCAAN#GSGGDEGPDPDLICR.N	2	-0.18	3.034	153	1000	SO3A1_HUMAN Solute carrier organic anion transporter family member 3A1
Q9UIQ6	LNPEP	R.YELSLHPN#LTSM*TFR.G	3	0.28	2.342	184	1000	LCAP_HUMAN Leucyl-cystinyl aminopeptidase
Q9UIQ6	LNPEP	R.EETLLYDSN#TSSMADRK.L	3	0.57	1.069	448	1000	LCAP_HUMAN Leucyl-cystinyl aminopeptidase
Q9UIQ6	LNPEP	R.SALLEFACTHNLGN#CSTTAMK.L	3	-4.23	4.219	834	23.624	LCAP_HUMAN Leucyl-cystinyl aminopeptidase
Q9UIW2	PLXNA1	K.YN#YTEDPTILR.I	2	-0.04	1.123	1043	1000	PLXA1_HUMAN Plexin-A1
Q9UIW2	PLXNA1	K.LSGN#LTLLR.A	2	0.83	3.418	77	1000	PLXA1_HUMAN Plexin-A1
Q9UIW2	PLXNA1	R.ENGCLVYN#DTTMVCR.A	2	-0.17	3.277	1098	71.753	PLXA1_HUMAN Plexin-A1
Q9UK23	NAGPA	R.GPGCDELDCGPSN#CSQHGLCTETGCR.C	3	-0.44	2.614	366	1000	NAGPA_HUMAN N-acetylglucosamine-1-phosphodiester alpha-N-acetylglucosaminidase
Q9UK23	NAGPA	R.CDAGWTGSN#CSEECPLGWHGPGCQRPCK.C	4	0.61	3.265	388	1000	NAGPA_HUMAN N-acetylglucosamine-1-phosphodiester alpha-N-acetylglucosaminidase
Q9ULI3	HEG1	K.RTFLN#TTVEK.H	3	-1.07	2.722	1080	1000	HEG1_HUMAN Protein HEG homolog 1
Q9UM47	NOTCH3	R.CLHN#GTCVDLVGGFR.C	2	1.51	2.543	1179	1000	NOTC3_HUMAN Neurogenic locus notch homolog protein 3
Q9UN71	PCDHGB4	R.DQGSPALSAN#VSLR.V	2	-0.35	1.193	543	1000	PCDGG_HUMAN Protocadherin gamma-B4
Q9UN76	SLC6A14	K.N#CSSWSDKN#CSR.S	3	-0.15	4.439	155	1000	S6A14_HUMAN Sodium- and chloride-dependent neutral and basic amino acid transporter B(0+)
Q9UN76	SLC6A14	K.N#CSSWSDKN#CSR.S	3	-0.15	4.439	163	1000	S6A14_HUMAN Sodium- and chloride-dependent neutral and basic amino acid transporter B(0+)
Q9UN76	SLC6A14	K.GIQEIIQM*N#K.S	3	0.42	1.438	189	1000	S6A14_HUMAN Sodium- and chloride-dependent neutral and basic amino acid transporter B(0+)
Q9UN76	SLC6A14	R.SPIVTHCN#VSTVNK.G	2	0.49	5.653	174	122.185	S6A14_HUMAN Sodium- and chloride-dependent neutral and basic amino acid transporter B(0+)
Q9UP38	FZD1	K.FPVHGAGELCVGQN#TSDK.G	3	0.87	4.068	231	1000	FZD1_HUMAN Frizzled-1
Q9UQV4	LAMP3	R.YFNIDPN#ATQASGNCGTR.K	2	-0.73	2.089	266	59.298	LAMP3_HUMAN Lysosome-associated membrane glycoprotein 3
Q9Y210	TRPC6	K.LLPN#ETSTDNAK.Q	2	-1.6	2.326	473	87.265	TRPC6_HUMAN Short transient receptor potential channel 6
Q9Y4D7	PLXND1	R.GN#ISAVAVR.F	2	0.08	1.704	155	1000	PLXD1_HUMAN Plexin-D1
Q9Y4D7	PLXND1	R.CTLQQDCTN#SSQQHFWTSASEGPSR.C	4	-0.63	1.59	583	1000	PLXD1_HUMAN Plexin-D1
Q9Y4D7	PLXND1	K.AN#FTIYDCSR.T	2	0.51	2.83	696	1000	PLXD1_HUMAN Plexin-D1
Q9Y4D7	PLXND1	K.INLN#ESMQVVSR.R	2	-0.77	4.091	500	48.874	PLXD1_HUMAN Plexin-D1
Q9Y5G0	PCDHGB5	R.EQTPEYN#VTITATDR.G	2	-0.75	2.26	415	1000	PCDGH_HUMAN Protocadherin gamma-B5
Q9Y5Y6	ST14	R.CDGWADCTDHSDELN#CSCDAGHQFTCK.N	4	-0.9	2.096	485	1000	ST14_HUMAN Suppressor of tumorigenicity 14 protein
Q9Y639	NPTN	K.AN#ATIEVK.A	2	0.78	1.329	229	1000	NPTN_HUMAN Neuroplastin
Q9Y639	NPTN	K.EN#GM*PM*DIVN#TSGR.F	2	-0.57	2.256	284	1000	NPTN_HUMAN Neuroplastin
Q9Y639	NPTN	R.KN#ASNMEYR.I	2	0.71	1.995	197	73.311	NPTN_HUMAN Neuroplastin
Q9Y653	GPR56	K.VAN#LTEPVVLTFQHQLQPK.N	3	1.94	5.824	324	1000	GPR56_HUMAN G-protein coupled receptor 56
Q9Y6M7	SLC4A7	K.KDN#ITAHN#ISWR.N	4	0.39	1.402	786	1000	S4A7_HUMAN Sodium bicarbonate cotransporter 3
Q9Y6M7	SLC4A7	K.KDN#ITAHN#ISWR.N	4	0.39	1.402	791	1000	S4A7_HUMAN Sodium bicarbonate cotransporter 3
Q9Y6M7	SLC4A7	R.N#LTVSECK.K	2	-0.54	2.272	796	1000	S4A7_HUMAN Sodium bicarbonate cotransporter 3
Q9Y6N7	ROBO1	K.VWCLGN#ETR.Y	2	1.06	2.673	820	1000	ROBO1_HUMAN Roundabout homolog 1
Q9Y6X5	ENPP4	K.YGPEDKEN#M*SR.V	3	0.67	1.18	202	1000	ENPP4_HUMAN Bis(5'-adenosyl)-triphosphatase ENPP4
Q9Y6X5	ENPP4	K.IN#RTEVYNK.L	3	-0.61	3.333	276	97.602	ENPP4_HUMAN Bis(5'-adenosyl)-triphosphatase ENPP4
Q9Y6X5	ENPP4	K.LKN#CSPHMNVYLK.E	3	-0.52	2.612	286	97.602	ENPP4_HUMAN Bis(5'-adenosyl)-triphosphatase ENPP4
