# Supplementary material for: Unraveling the surface glycoprotein interaction network by integrating chemical crosslinking with MS-based proteomics
Source: Royal Society of Chemistry journal article supplement (doi:10.1039/d0sc06327d), 2021-01-01
Supplement: d0sc06327d4.xlsx [file d0sc06327d4.xlsx]

## Sheet: Protein domain
Table S3. Protein domains from the identified proteins with fold change>2 and P<0.05
Uniprot ID	Gene Symbol	Start Residue	End Residue	Domain	E-value	Annotation
A6NFQ2	FAM115C	96	305	Class I glutamine amidotransferase-like	4.35e-11	F115C_HUMAN Protein FAM115C
A6NIZ1		2	165	P-loop containing nucleoside triphosphate hydrolases	9.32e-52	RP1BL_HUMAN Ras-related protein Rap-1b-like protein
A8MTJ3	GNAT3	61	181	Transducin (alpha subunit), insertion domain	9.94e-43	GNAT3_HUMAN Guanine nucleotide-binding protein G(t) subunit alpha-3
A8MTJ3	GNAT3	31	353	P-loop containing nucleoside triphosphate hydrolases	1.25e-60	GNAT3_HUMAN Guanine nucleotide-binding protein G(t) subunit alpha-3
B9A064	IGLL5	111	208	Immunoglobulin	1.39e-29	IGLL5_HUMAN Immunoglobulin lambda-like polypeptide 5
H7C2T4	SPRED2	1	56	PH domain-like	1.02e-18	H7C2T4_HUMAN Sprouty-related, EVH1 domain-containing protein 2 (Fragment)
O00214	LGALS8	12	151	Concanavalin A-like lectins/glucanases	2.59e-45	LEG8_HUMAN Galectin-8
O00214	LGALS8	183	315	Concanavalin A-like lectins/glucanases	7.2e-41	LEG8_HUMAN Galectin-8
O00220	TNFRSF10A	121	165	TNF receptor-like	1.22e-12	TR10A_HUMAN Tumor necrosis factor receptor superfamily member 10A
O00220	TNFRSF10A	166	226	TNF receptor-like	1.07e-09	TR10A_HUMAN Tumor necrosis factor receptor superfamily member 10A
O00220	TNFRSF10A	207	235	TNF receptor-like	1.86e-11	TR10A_HUMAN Tumor necrosis factor receptor superfamily member 10A
O00220	TNFRSF10A	358	456	DEATH domain	2.89e-21	TR10A_HUMAN Tumor necrosis factor receptor superfamily member 10A
O00391	QSOX1	39	152	Thioredoxin-like	1.73e-19	QSOX1_HUMAN Sulfhydryl oxidase 1
O00391	QSOX1	396	505	FAD-dependent thiol oxidase	8.11e-29	QSOX1_HUMAN Sulfhydryl oxidase 1
O14556	GAPDHS	77	240	NAD(P)-binding Rossmann-fold domains	4.04e-65	G3PT_HUMAN Glyceraldehyde-3-phosphate dehydrogenase, testis-specific
O14556	GAPDHS	223	386	Glyceraldehyde-3-phosphate dehydrogenase-like, C-terminal domain	4.99e-81	G3PT_HUMAN Glyceraldehyde-3-phosphate dehydrogenase, testis-specific
O14745	SLC9A3R1	10	95	PDZ domain-like	1.58e-27	NHRF1_HUMAN Na(+)/H(+) exchange regulatory cofactor NHE-RF1
O14745	SLC9A3R1	137	235	PDZ domain-like	1.84e-27	NHRF1_HUMAN Na(+)/H(+) exchange regulatory cofactor NHE-RF1
O14763	TNFRSF10B	70	114	TNF receptor-like	9.42e-13	TR10B_HUMAN Tumor necrosis factor receptor superfamily member 10B
O14763	TNFRSF10B	115	154	TNF receptor-like	4.07e-10	TR10B_HUMAN Tumor necrosis factor receptor superfamily member 10B
O14763	TNFRSF10B	155	184	TNF receptor-like	2.36e-12	TR10B_HUMAN Tumor necrosis factor receptor superfamily member 10B
O14763	TNFRSF10B	334	430	DEATH domain	2.83e-20	TR10B_HUMAN Tumor necrosis factor receptor superfamily member 10B
O14787	TNPO2	1	887	ARM repeat	1.6e-205	TNPO2_HUMAN Transportin-2
O14980	XPO1	28	377	CATH	1.99e-45	XPO1_HUMAN Exportin-1
O14980	XPO1	488	908	CATH	1.33e-97	XPO1_HUMAN Exportin-1
O14980	XPO1	28	1023	ARM repeat	3.75e-187	XPO1_HUMAN Exportin-1
O15020	SPTBN2	297	419	Spectrin repeat	9.95e-34	SPTN2_HUMAN Spectrin beta chain, non-erythrocytic 2
O15020	SPTBN2	429	527	Spectrin repeat	2.88e-19	SPTN2_HUMAN Spectrin beta chain, non-erythrocytic 2
O15020	SPTBN2	532	640	Spectrin repeat	1.15e-21	SPTN2_HUMAN Spectrin beta chain, non-erythrocytic 2
O15020	SPTBN2	697	813	Spectrin repeat	5.01e-25	SPTN2_HUMAN Spectrin beta chain, non-erythrocytic 2
O15020	SPTBN2	907	1062	Spectrin repeat	1.18e-29	SPTN2_HUMAN Spectrin beta chain, non-erythrocytic 2
O15020	SPTBN2	1031	1168	Spectrin repeat	1.56e-23	SPTN2_HUMAN Spectrin beta chain, non-erythrocytic 2
O15020	SPTBN2	1226	1379	Spectrin repeat	3.82e-26	SPTN2_HUMAN Spectrin beta chain, non-erythrocytic 2
O15020	SPTBN2	1381	1493	Spectrin repeat	2.62e-18	SPTN2_HUMAN Spectrin beta chain, non-erythrocytic 2
O15020	SPTBN2	1482	1594	Spectrin repeat	1.09e-20	SPTN2_HUMAN Spectrin beta chain, non-erythrocytic 2
O15020	SPTBN2	1562	1692	Spectrin repeat	5.89e-22	SPTN2_HUMAN Spectrin beta chain, non-erythrocytic 2
O15020	SPTBN2	1696	1800	Spectrin repeat	7.8e-21	SPTN2_HUMAN Spectrin beta chain, non-erythrocytic 2
O15020	SPTBN2	1854	2010	Spectrin repeat	3.54e-26	SPTN2_HUMAN Spectrin beta chain, non-erythrocytic 2
O15020	SPTBN2	2015	2075	Spectrin repeat	4.75e-10	SPTN2_HUMAN Spectrin beta chain, non-erythrocytic 2
O15020	SPTBN2	2211	2332	PH domain-like	5.09e-35	SPTN2_HUMAN Spectrin beta chain, non-erythrocytic 2
O15020	SPTBN2	17	282	Calponin-homology domain, CH-domain	2.37e-90	SPTN2_HUMAN Spectrin beta chain, non-erythrocytic 2
O15400	STX7	12	220	t-snare proteins	2.51e-48	STX7_HUMAN Syntaxin-7
O15427	SLC16A3	13	412	MFS general substrate transporter	3.53e-54	MOT4_HUMAN Monocarboxylate transporter 4
O43520	ATP8B1	458	714	Metal cation-transporting ATPase, ATP-binding domain N	2.83e-26	AT8B1_HUMAN Probable phospholipid-transporting ATPase IC
O43520	ATP8B1	441	935	HAD-like	1.01e-34	AT8B1_HUMAN Probable phospholipid-transporting ATPase IC
O43520	ATP8B1	90	1171	Calcium ATPase, transmembrane domain M	2.22e-55	AT8B1_HUMAN Probable phospholipid-transporting ATPase IC
O43520	ATP8B1	175	322	Calcium ATPase, transduction domain A	1.7e-20	AT8B1_HUMAN Probable phospholipid-transporting ATPase IC
O60423	ATP8B3	499	714	Metal cation-transporting ATPase, ATP-binding domain N	1.87e-20	AT8B3_HUMAN Probable phospholipid-transporting ATPase IK
O60423	ATP8B3	488	993	HAD-like	1.19e-32	AT8B3_HUMAN Probable phospholipid-transporting ATPase IK
O60423	ATP8B3	130	1179	Calcium ATPase, transmembrane domain M	2.35e-40	AT8B3_HUMAN Probable phospholipid-transporting ATPase IK
O60423	ATP8B3	216	364	Calcium ATPase, transduction domain A	1.96e-18	AT8B3_HUMAN Probable phospholipid-transporting ATPase IK
O60449	LY75	33	155	Ricin B-like lectins	1.06e-24	LY75_HUMAN Isoform 2 of Lymphocyte antigen 75
O60449	LY75	154	210	Kringle-like	1.2e-15	LY75_HUMAN Isoform 2 of Lymphocyte antigen 75
O60449	LY75	210	348	C-type lectin-like	9.62e-34	LY75_HUMAN Isoform 2 of Lymphocyte antigen 75
O60449	LY75	350	487	C-type lectin-like	3.04e-33	LY75_HUMAN Isoform 2 of Lymphocyte antigen 75
O60449	LY75	499	625	C-type lectin-like	2.27e-19	LY75_HUMAN Isoform 2 of Lymphocyte antigen 75
O60449	LY75	635	792	C-type lectin-like	6.07e-25	LY75_HUMAN Isoform 2 of Lymphocyte antigen 75
O60449	LY75	818	932	C-type lectin-like	3.71e-16	LY75_HUMAN Isoform 2 of Lymphocyte antigen 75
O60449	LY75	949	1092	C-type lectin-like	1.45e-27	LY75_HUMAN Isoform 2 of Lymphocyte antigen 75
O60449	LY75	1107	1223	C-type lectin-like	5.95e-26	LY75_HUMAN Isoform 2 of Lymphocyte antigen 75
O60449	LY75	1239	1359	C-type lectin-like	1.61e-18	LY75_HUMAN Isoform 2 of Lymphocyte antigen 75
O60449	LY75	1372	1515	C-type lectin-like	9.1e-29	LY75_HUMAN Isoform 2 of Lymphocyte antigen 75
O60449	LY75	1534	1662	C-type lectin-like	3.67e-27	LY75_HUMAN Isoform 2 of Lymphocyte antigen 75
O60669	SLC16A7	15	438	MFS general substrate transporter	3.27e-62	MOT2_HUMAN Monocarboxylate transporter 2
O60911	CTSV	21	333	Cysteine proteinases	3.22e-126	CATL2_HUMAN Cathepsin L2
O75110	ATP9A	395	616	Metal cation-transporting ATPase, ATP-binding domain N	4.8e-16	ATP9A_HUMAN Probable phospholipid-transporting ATPase IIA
O75110	ATP9A	378	827	HAD-like	1.17e-35	ATP9A_HUMAN Probable phospholipid-transporting ATPase IIA
O75110	ATP9A	47	1039	Calcium ATPase, transmembrane domain M	3.53e-40	ATP9A_HUMAN Probable phospholipid-transporting ATPase IIA
O75110	ATP9A	139	279	Calcium ATPase, transduction domain A	3.53e-17	ATP9A_HUMAN Probable phospholipid-transporting ATPase IIA
O75155	CAND2	8	1214	ARM repeat	2.19e-226	CAND2_HUMAN Cullin-associated NEDD8-dissociated protein 2
O75509	TNFRSF21	64	107	TNF receptor-like	3.16e-10	TNR21_HUMAN Tumor necrosis factor receptor superfamily member 21
O75509	TNFRSF21	106	165	TNF receptor-like	1.81e-10	TNR21_HUMAN Tumor necrosis factor receptor superfamily member 21
O75509	TNFRSF21	408	495	DEATH domain	5.89e-14	TNR21_HUMAN Tumor necrosis factor receptor superfamily member 21
O75955	FLOT1	32	175	Band 7/SPFH domain	1.18e-34	FLOT1_HUMAN Flotillin-1
O94979	SEC31A	38	333	WD40 repeat-like	9.49e-43	SC31A_HUMAN Protein transport protein Sec31A
O94985	CLSTN1	345	561	Concanavalin A-like lectins/glucanases	4.09e-25	CSTN1_HUMAN Calsyntenin-1
O94985	CLSTN1	40	164	Cadherin-like	1.01e-07	CSTN1_HUMAN Calsyntenin-1
O94985	CLSTN1	152	258	Cadherin-like	1.57e-15	CSTN1_HUMAN Calsyntenin-1
O95716	RAB3D	18	195	P-loop containing nucleoside triphosphate hydrolases	5.87e-60	RAB3D_HUMAN Ras-related protein Rab-3D
O95837	GNA14	63	182	Transducin (alpha subunit), insertion domain	3.66e-43	GNA14_HUMAN Guanine nucleotide-binding protein subunit alpha-14
O95837	GNA14	33	353	P-loop containing nucleoside triphosphate hydrolases	6.29e-57	GNA14_HUMAN Guanine nucleotide-binding protein subunit alpha-14
P00734	F2	339	618	Trypsin-like serine proteases	4.23e-87	THRB_HUMAN Prothrombin
P00734	F2	103	197	Kringle-like	2.9e-32	THRB_HUMAN Prothrombin
P00734	F2	209	297	Kringle-like	5.07e-27	THRB_HUMAN Prothrombin
P00734	F2	43	104	GLA-domain	7.91e-20	THRB_HUMAN Prothrombin
P00747	PLG	566	809	Trypsin-like serine proteases	8.65e-84	PLMN_HUMAN Plasminogen
P00747	PLG	90	183	Kringle-like	3.62e-36	PLMN_HUMAN Plasminogen
P00747	PLG	183	266	Kringle-like	3.14e-33	PLMN_HUMAN Plasminogen
P00747	PLG	273	358	Kringle-like	2.66e-35	PLMN_HUMAN Plasminogen
P00747	PLG	366	468	Kringle-like	1.52e-39	PLMN_HUMAN Plasminogen
P00747	PLG	465	563	Kringle-like	2.1e-34	PLMN_HUMAN Plasminogen
P00747	PLG	19	100	Hairpin loop containing domain-like	1.02e-20	PLMN_HUMAN Plasminogen
P01008	SERPINC1	47	461	Serpins	3.01e-138	ANT3_HUMAN Antithrombin-III
P01024	C3	1512	1661	TIMP-like	1.37e-47	CO3_HUMAN Complement C3
P01024	C3	998	1284	Terpenoid cyclases/Protein prenyltransferases	4.54e-96	CO3_HUMAN Complement C3
P01024	C3	675	742	Anaphylotoxins (complement system)	2.22e-20	CO3_HUMAN Complement C3
P01024	C3	1358	1513	Alpha-macroglobulin receptor domain	1.57e-39	CO3_HUMAN Complement C3
P01031	C5	1535	1676	TIMP-like	2.23e-48	CO5_HUMAN Complement C5
P01031	C5	992	1304	Terpenoid cyclases/Protein prenyltransferases	4.21e-70	CO5_HUMAN Complement C5
P01031	C5	6	665	PDB	3.81e-101	CO5_HUMAN Complement C5
P01031	C5	757	821	ECOD	1.84e-27	CO5_HUMAN Complement C5
P01031	C5	923	1363	ECOD	1.43e-70	CO5_HUMAN Complement C5
P01031	C5	687	753	CATH	1.48e-26	CO5_HUMAN Complement C5
P01031	C5	679	741	Anaphylotoxins (complement system)	6.22e-31	CO5_HUMAN Complement C5
P01031	C5	1374	1527	Alpha-macroglobulin receptor domain	8.78e-30	CO5_HUMAN Complement C5
P01033	TIMP1	24	202	TIMP-like	8.83e-74	TIMP1_HUMAN Metalloproteinase inhibitor 1
P01034	CST3	36	144	Cystatin/monellin	3.83e-36	CYTC_HUMAN Cystatin-C
P01042	KNG1	25	127	Cystatin/monellin	4.37e-23	KNG1_HUMAN Kininogen-1
P01042	KNG1	143	251	Cystatin/monellin	6.8e-24	KNG1_HUMAN Kininogen-1
P01042	KNG1	265	371	Cystatin/monellin	2.84e-27	KNG1_HUMAN Kininogen-1
P01111	NRAS	3	164	P-loop containing nucleoside triphosphate hydrolases	4.18e-53	RASN_HUMAN GTPase NRas
P01344	IGF2	16	91	Insulin-like	7.45e-20	IGF2_HUMAN Insulin-like growth factor II
P02008	HBZ	3	142	Globin-like	1.47e-58	HBAZ_HUMAN Hemoglobin subunit zeta
P02749	APOH	22	93	Complement control module/SCR domain	8.9e-11	APOH_HUMAN Beta-2-glycoprotein 1
P02749	APOH	83	149	Complement control module/SCR domain	1.1e-16	APOH_HUMAN Beta-2-glycoprotein 1
P02749	APOH	140	214	Complement control module/SCR domain	2.64e-12	APOH_HUMAN Beta-2-glycoprotein 1
P02749	APOH	205	267	Complement control module/SCR domain	5.67e-14	APOH_HUMAN Beta-2-glycoprotein 1
P02749	APOH	264	345	Complement control module/SCR domain	1.19e-20	APOH_HUMAN Beta-2-glycoprotein 1
P02774	GC	19	210	Serum albumin-like	6.84e-53	VTDB_HUMAN Vitamin D-binding protein
P02774	GC	216	401	Serum albumin-like	9.68e-47	VTDB_HUMAN Vitamin D-binding protein
P02774	GC	403	473	Serum albumin-like	1.57e-19	VTDB_HUMAN Vitamin D-binding protein
P02787	TF	23	346	Periplasmic binding protein-like II	1.6e-127	TRFE_HUMAN Serotransferrin
P02787	TF	359	697	Periplasmic binding protein-like II	4.34e-138	TRFE_HUMAN Serotransferrin
P02788	LTF	23	352	Periplasmic binding protein-like II	1.16e-126	TRFL_HUMAN Lactotransferrin
P02788	LTF	354	710	Periplasmic binding protein-like II	2.63e-147	TRFL_HUMAN Lactotransferrin
P04406	GAPDH	4	173	NAD(P)-binding Rossmann-fold domains	1.94e-88	G3P_HUMAN Glyceraldehyde-3-phosphate dehydrogenase
P04406	GAPDH	151	314	Glyceraldehyde-3-phosphate dehydrogenase-like, C-terminal domain	1.5e-88	G3P_HUMAN Glyceraldehyde-3-phosphate dehydrogenase
P04424	ASL	11	460	L-aspartase-like	9.27e-141	ARLY_HUMAN Argininosuccinate lyase
P04632	CAPNS1	49	266	EF-hand	4.54e-65	CPNS1_HUMAN Calpain small subunit 1
P05023	ATP1A1	383	595	Metal cation-transporting ATPase, ATP-binding domain N	2.55e-70	AT1A1_HUMAN Sodium/potassium-transporting ATPase subunit alpha-1
P05023	ATP1A1	362	759	HAD-like	1.22e-40	AT1A1_HUMAN Sodium/potassium-transporting ATPase subunit alpha-1
P05023	ATP1A1	41	1014	Calcium ATPase, transmembrane domain M	4.05e-130	AT1A1_HUMAN Sodium/potassium-transporting ATPase subunit alpha-1
P05023	ATP1A1	166	272	Calcium ATPase, transduction domain A	3.4e-29	AT1A1_HUMAN Sodium/potassium-transporting ATPase subunit alpha-1
P05067	APP	375	565	CAPPD, an extracellular domain of amyloid beta A4 protein	9.29e-83	A4_HUMAN Amyloid beta A4 protein
P05067	APP	286	343	BPTI-like	8.66e-21	A4_HUMAN Amyloid beta A4 protein
P05067	APP	124	188	Amyloid beta a4 protein copper binding domain (domain 2)	2.62e-29	A4_HUMAN Amyloid beta A4 protein
P05067	APP	29	123	A heparin-binding domain	1.57e-44	A4_HUMAN Amyloid beta A4 protein
P05155	SERPING1	127	498	Serpins	3.93e-91	IC1_HUMAN Plasma protease C1 inhibitor
P05156	CFI	322	574	Trypsin-like serine proteases	2.88e-68	CFAI_HUMAN Complement factor I
P05156	CFI	110	219	SRCR-like	4.71e-19	CFAI_HUMAN Complement factor I
P05156	CFI	224	256	LDL receptor-like module	5.63e-08	CFAI_HUMAN Complement factor I
P05156	CFI	258	296	LDL receptor-like module	7.59e-10	CFAI_HUMAN Complement factor I
P05156	CFI	46	106	Kazal-type serine protease inhibitors	5.42e-05	CFAI_HUMAN Complement factor I
P05452	CLEC3B	47	74	Triple coiled coil domain of C-type lectins	7.85e-08	TETN_HUMAN Tetranectin
P05452	CLEC3B	67	199	C-type lectin-like	1.08e-33	TETN_HUMAN Tetranectin
P06396	GSN	57	196	Actin depolymerizing proteins	7.75e-43	GELS_HUMAN Gelsolin
P06396	GSN	188	277	Actin depolymerizing proteins	2.85e-38	GELS_HUMAN Gelsolin
P06396	GSN	299	398	Actin depolymerizing proteins	2.15e-32	GELS_HUMAN Gelsolin
P06396	GSN	424	568	Actin depolymerizing proteins	8.93e-38	GELS_HUMAN Gelsolin
P06396	GSN	563	649	Actin depolymerizing proteins	8.42e-27	GELS_HUMAN Gelsolin
P06396	GSN	665	765	Actin depolymerizing proteins	1.5e-35	GELS_HUMAN Gelsolin
P07225	PROS1	120	248	Growth factor receptor domain	4.08e-14	PROS_HUMAN Vitamin K-dependent protein S
P07225	PROS1	41	93	GLA-domain	2.52e-20	PROS_HUMAN Vitamin K-dependent protein S
P07225	PROS1	266	455	Concanavalin A-like lectins/glucanases	2.18e-35	PROS_HUMAN Vitamin K-dependent protein S
P07225	PROS1	468	669	Concanavalin A-like lectins/glucanases	7.52e-28	PROS_HUMAN Vitamin K-dependent protein S
P07355	ANXA2	17	336	Annexin	3.93e-124	ANXA2_HUMAN Annexin A2
P07384	CAPN1	532	712	EF-hand	4.83e-47	CAN1_HUMAN Calpain-1 catalytic subunit
P07384	CAPN1	14	362	Cysteine proteinases	2.62e-138	CAN1_HUMAN Calpain-1 catalytic subunit
P07384	CAPN1	366	526	Calpain large subunit, middle domain (domain III)	2.09e-57	CAN1_HUMAN Calpain-1 catalytic subunit
P07948	LYN	64	149	SH3-domain	7.08e-22	LYN_HUMAN Tyrosine-protein kinase Lyn
P07948	LYN	124	267	SH2 domain	3.13e-37	LYN_HUMAN Tyrosine-protein kinase Lyn
P07948	LYN	234	500	Protein kinase-like (PK-like)	2.6e-79	LYN_HUMAN Tyrosine-protein kinase Lyn
P08133	ANXA6	10	346	Annexin	5.76e-126	ANXA6_HUMAN Annexin A6
P08133	ANXA6	353	673	Annexin	1.27e-118	ANXA6_HUMAN Annexin A6
P08134	RHOC	6	177	P-loop containing nucleoside triphosphate hydrolases	1.36e-58	RHOC_HUMAN Rho-related GTP-binding protein RhoC
P08758	ANXA5	6	320	Annexin	2.86e-192	ANXA5_HUMAN Annexin A5
P09382	LGALS1	12	134	Concanavalin A-like lectins/glucanases	1.43e-49	LEG1_HUMAN Galectin-1
P09525	ANXA4	6	319	Annexin	9.52e-206	ANXA4_HUMAN Annexin A4
P0C0L4	C4A	1589	1742	TIMP-like	1.02e-37	CO4A_HUMAN Complement C4-A
P0C0L4	C4A	995	1317	Terpenoid cyclases/Protein prenyltransferases	8.9e-88	CO4A_HUMAN Complement C4-A
P0C0L4	C4A	682	750	Anaphylotoxins (complement system)	7.98e-19	CO4A_HUMAN Complement C4-A
P0C0L4	C4A	1459	1590	Alpha-macroglobulin receptor domain	1.05e-37	CO4A_HUMAN Complement C4-A
P10114	RAP2A	2	167	P-loop containing nucleoside triphosphate hydrolases	3.09e-53	RAP2A_HUMAN Ras-related protein Rap-2a
P10619	CTSA	29	479	alpha/beta-Hydrolases	2.24e-141	PPGB_HUMAN Lysosomal protective protein
P11166	SLC2A1	21	222	MFS general substrate transporter	1.3e-50	GTR1_HUMAN Solute carrier family 2, facilitated glucose transporter member 1
P11166	SLC2A1	250	463	MFS general substrate transporter	1.3e-50	GTR1_HUMAN Solute carrier family 2, facilitated glucose transporter member 1
P11233	RALA	16	174	P-loop containing nucleoside triphosphate hydrolases	4.56e-80	RALA_HUMAN Ras-related protein Ral-A
P12259	F5	1904	2064	Galactose-binding domain-like	2.63e-53	FA5_HUMAN Coagulation factor V
P12259	F5	2065	2223	Galactose-binding domain-like	9.22e-56	FA5_HUMAN Coagulation factor V
P12259	F5	31	201	Cupredoxins	1.93e-45	FA5_HUMAN Coagulation factor V
P12259	F5	207	329	Cupredoxins	5.16e-32	FA5_HUMAN Coagulation factor V
P12259	F5	349	534	Cupredoxins	6.75e-46	FA5_HUMAN Coagulation factor V
P12259	F5	541	667	Cupredoxins	1.92e-36	FA5_HUMAN Coagulation factor V
P12259	F5	1578	1760	Cupredoxins	6.37e-50	FA5_HUMAN Coagulation factor V
P12259	F5	1767	1904	Cupredoxins	5.09e-32	FA5_HUMAN Coagulation factor V
P12268	IMPDH2	28	479	Inosine monophosphate dehydrogenase (IMPDH)	2.27e-189	IMDH2_HUMAN Inosine-5'-monophosphate dehydrogenase 2
P12268	IMPDH2	115	229	CBS-domain pair	4.32e-25	IMDH2_HUMAN Inosine-5'-monophosphate dehydrogenase 2
P12429	ANXA3	9	323	Annexin	2.86e-193	ANXA3_HUMAN Annexin A3
P13637	ATP1A3	373	585	Metal cation-transporting ATPase, ATP-binding domain N	3.6e-71	AT1A3_HUMAN Sodium/potassium-transporting ATPase subunit alpha-3
P13637	ATP1A3	352	749	HAD-like	1.45e-40	AT1A3_HUMAN Sodium/potassium-transporting ATPase subunit alpha-3
P13637	ATP1A3	32	1003	Calcium ATPase, transmembrane domain M	4.32e-131	AT1A3_HUMAN Sodium/potassium-transporting ATPase subunit alpha-3
P13637	ATP1A3	156	262	Calcium ATPase, transduction domain A	1.57e-28	AT1A3_HUMAN Sodium/potassium-transporting ATPase subunit alpha-3
P15311	EZR	2	87	Ubiquitin-like	4.55e-26	EZRI_HUMAN Ezrin
P15311	EZR	89	198	Second domain of FERM	1.7e-38	EZRI_HUMAN Ezrin
P15311	EZR	199	344	PH domain-like	1.7e-45	EZRI_HUMAN Ezrin
P15311	EZR	498	586	Moesin tail domain	1.57e-31	EZRI_HUMAN Ezrin
P15313	ATP6V1B1	114	399	P-loop containing nucleoside triphosphate hydrolases	1.28e-82	VATB1_HUMAN V-type proton ATPase subunit B, kidney isoform
P15514	AREG	141	186	EGF/Laminin	1e-12	AREG_HUMAN Amphiregulin
P15559	NQO1	5	272	Flavoproteins	3.59e-77	NQO1_HUMAN NAD(P)H dehydrogenase [quinone] 1
P16455	MGMT	100	174	Methylated DNA-protein cysteine methyltransferase, C-terminal domain	6.15e-42	MGMT_HUMAN Methylated-DNA--protein-cysteine methyltransferase
P16455	MGMT	9	91	Methylated DNA-protein cysteine methyltransferase domain	8.35e-28	MGMT_HUMAN Methylated-DNA--protein-cysteine methyltransferase
P16471	PRLR	18	120	Fibronectin type III	8.58e-36	PRLR_HUMAN Prolactin receptor
P16471	PRLR	125	227	Fibronectin type III	2.09e-21	PRLR_HUMAN Prolactin receptor
P16520	GNB3	4	340	WD40 repeat-like	1.5e-81	GBB3_HUMAN Guanine nucleotide-binding protein G(I)/G(S)/G(T) subunit beta-3
P17612	PRKACA	44	330	Protein kinase-like (PK-like)	1.06e-104	KAPCA_HUMAN cAMP-dependent protein kinase catalytic subunit alpha
P17612	PRKACA	12	165	CATH	4.06e-46	KAPCA_HUMAN cAMP-dependent protein kinase catalytic subunit alpha
P17931	LGALS3	115	247	Concanavalin A-like lectins/glucanases	2.59e-46	LEG3_HUMAN Galectin-3
P17987	TCP1	144	406	GroEL-intermediate domain like	1.43e-29	TCPA_HUMAN T-complex protein 1 subunit alpha
P17987	TCP1	10	533	GroEL equatorial domain-like	2.22e-84	TCPA_HUMAN T-complex protein 1 subunit alpha
P17987	TCP1	207	379	GroEL apical domain-like	4.97e-47	TCPA_HUMAN T-complex protein 1 subunit alpha
P18065	IGFBP2	220	310	Thyroglobulin type-1 domain	3.01e-23	IBP2_HUMAN Insulin-like growth factor-binding protein 2
P18065	IGFBP2	39	136	Growth factor receptor domain	3.61e-18	IBP2_HUMAN Insulin-like growth factor-binding protein 2
P18085	ARF4	14	177	P-loop containing nucleoside triphosphate hydrolases	1.61e-56	ARF4_HUMAN ADP-ribosylation factor 4
P19823	ITIH2	261	494	vWA-like	2.62e-33	ITIH2_HUMAN Inter-alpha-trypsin inhibitor heavy chain H2
P19827	ITIH1	240	477	vWA-like	9.04e-29	ITIH1_HUMAN Inter-alpha-trypsin inhibitor heavy chain H1
P20020	ATP2B1	479	690	Metal cation-transporting ATPase, ATP-binding domain N	4.58e-46	AT2B1_HUMAN Plasma membrane calcium-transporting ATPase 1
P20020	ATP2B1	472	899	HAD-like	3.62e-53	AT2B1_HUMAN Plasma membrane calcium-transporting ATPase 1
P20020	ATP2B1	50	1066	Calcium ATPase, transmembrane domain M	9.02e-123	AT2B1_HUMAN Plasma membrane calcium-transporting ATPase 1
P20020	ATP2B1	192	290	Calcium ATPase, transduction domain A	6.28e-27	AT2B1_HUMAN Plasma membrane calcium-transporting ATPase 1
P20827	EFNA1	17	147	Cupredoxins	1.82e-49	EFNA1_HUMAN Ephrin-A1
P21741	MDK	23	81	Midkine	6.02e-26	MK_HUMAN Midkine
P21741	MDK	84	126	Midkine	1.65e-19	MK_HUMAN Midkine
P21926	CD9	111	193	Tetraspanin	8.37e-19	CD9_HUMAN CD9 antigen
P22692	IGFBP4	169	252	Thyroglobulin type-1 domain	9.03e-23	IBP4_HUMAN Insulin-like growth factor-binding protein 4
P22692	IGFBP4	24	104	Growth factor receptor domain	9.42e-24	IBP4_HUMAN Insulin-like growth factor-binding protein 4
P23142	FBLN1	279	399	Growth factor receptor domain	8.32e-13	FBLN1_HUMAN Fibulin-1
P23142	FBLN1	400	536	Growth factor receptor domain	1.38e-14	FBLN1_HUMAN Fibulin-1
P23142	FBLN1	182	227	EGF/Laminin	8.38e-09	FBLN1_HUMAN Fibulin-1
P23142	FBLN1	216	273	EGF/Laminin	7.18e-06	FBLN1_HUMAN Fibulin-1
P23142	FBLN1	524	563	EGF/Laminin	8.69e-05	FBLN1_HUMAN Fibulin-1
P23634	ATP2B4	469	678	Metal cation-transporting ATPase, ATP-binding domain N	1.18e-47	AT2B4_HUMAN Plasma membrane calcium-transporting ATPase 4
P23634	ATP2B4	462	887	HAD-like	4.13e-53	AT2B4_HUMAN Plasma membrane calcium-transporting ATPase 4
P23634	ATP2B4	44	1053	Calcium ATPase, transmembrane domain M	6.8e-125	AT2B4_HUMAN Plasma membrane calcium-transporting ATPase 4
P23634	ATP2B4	188	286	Calcium ATPase, transduction domain A	1.16e-26	AT2B4_HUMAN Plasma membrane calcium-transporting ATPase 4
P24593	IGFBP5	185	266	Thyroglobulin type-1 domain	8.89e-26	IBP5_HUMAN Insulin-like growth factor-binding protein 5
P24593	IGFBP5	24	106	Growth factor receptor domain	3.77e-24	IBP5_HUMAN Insulin-like growth factor-binding protein 5
P26196	DDX6	164	451	P-loop containing nucleoside triphosphate hydrolases	9.42e-68	DDX6_HUMAN Probable ATP-dependent RNA helicase DDX6
P26572	MGAT1	106	444	Nucleotide-diphospho-sugar transferases	1.41e-62	MGAT1_HUMAN Alpha-1,3-mannosyl-glycoprotein 2-beta-N-acetylglucosaminyltransferase
P27449	ATP6V0C	12	77	F1F0 ATP synthase subunit C	1.01e-06	VATL_HUMAN V-type proton ATPase 16 kDa proteolipid subunit
P27449	ATP6V0C	85	154	F1F0 ATP synthase subunit C	2.35e-20	VATL_HUMAN V-type proton ATPase 16 kDa proteolipid subunit
P29373	CRABP2	3	137	Lipocalins	1.78e-50	RABP2_HUMAN Cellular retinoic acid-binding protein 2
P30086	PEBP1	27	177	PEBP-like	5.71e-66	PEBP1_HUMAN Phosphatidylethanolamine-binding protein 1
P30542	ADORA1	5	310	Family A G protein-coupled receptor-like	1.28e-60	AA1R_HUMAN Adenosine receptor A1
P35221	CTNNA1	58	260	alpha-catenin/vinculin-like	7.59e-68	CTNA1_HUMAN Catenin alpha-1
P35221	CTNNA1	377	506	alpha-catenin/vinculin-like	2.83e-47	CTNA1_HUMAN Catenin alpha-1
P35221	CTNNA1	508	631	alpha-catenin/vinculin-like	1.67e-58	CTNA1_HUMAN Catenin alpha-1
P35221	CTNNA1	673	862	alpha-catenin/vinculin-like	6.28e-56	CTNA1_HUMAN Catenin alpha-1
P35232	PHB	58	194	Band 7/SPFH domain	6.67e-18	PHB_HUMAN Prohibitin
P35241	RDX	2	87	Ubiquitin-like	3.31e-26	RADI_HUMAN Radixin
P35241	RDX	89	198	Second domain of FERM	9.55e-40	RADI_HUMAN Radixin
P35241	RDX	199	339	PH domain-like	3.69e-44	RADI_HUMAN Radixin
P35241	RDX	496	583	Moesin tail domain	4.18e-33	RADI_HUMAN Radixin
P35475	IDUA	385	551	Glycosyl hydrolase domain	5.4e-38	IDUA_HUMAN Alpha-L-iduronidase
P35475	IDUA	42	394	(Trans)glycosidases	1.83e-60	IDUA_HUMAN Alpha-L-iduronidase
P35499	SCN4A	130	454	Voltage-gated potassium channels	4.71e-29	SCN4A_HUMAN Sodium channel protein type 4 subunit alpha
P35499	SCN4A	578	806	Voltage-gated potassium channels	1.22e-31	SCN4A_HUMAN Sodium channel protein type 4 subunit alpha
P35499	SCN4A	1030	1302	Voltage-gated potassium channels	2.88e-42	SCN4A_HUMAN Sodium channel protein type 4 subunit alpha
P35499	SCN4A	1353	1602	Voltage-gated potassium channels	3.14e-38	SCN4A_HUMAN Sodium channel protein type 4 subunit alpha
P35670	ATP7B	55	126	HMA, heavy metal-associated domain	5.63e-16	ATP7B_HUMAN Copper-transporting ATPase 2
P35670	ATP7B	140	210	HMA, heavy metal-associated domain	5.5e-19	ATP7B_HUMAN Copper-transporting ATPase 2
P35670	ATP7B	253	318	HMA, heavy metal-associated domain	2.75e-16	ATP7B_HUMAN Copper-transporting ATPase 2
P35670	ATP7B	356	428	HMA, heavy metal-associated domain	1.44e-21	ATP7B_HUMAN Copper-transporting ATPase 2
P35670	ATP7B	488	557	HMA, heavy metal-associated domain	4.97e-18	ATP7B_HUMAN Copper-transporting ATPase 2
P35670	ATP7B	566	635	HMA, heavy metal-associated domain	8.12e-19	ATP7B_HUMAN Copper-transporting ATPase 2
P35670	ATP7B	1024	1370	HAD-like	1.19e-55	ATP7B_HUMAN Copper-transporting ATPase 2
P35670	ATP7B	757	1016	Calcium ATPase, transmembrane domain M	1.2e-09	ATP7B_HUMAN Copper-transporting ATPase 2
P35670	ATP7B	817	903	Calcium ATPase, transduction domain A	4.58e-23	ATP7B_HUMAN Copper-transporting ATPase 2
P36543	ATP6V1E1	89	217	V-type ATPase subunit E-like	1.96e-30	VATE1_HUMAN V-type proton ATPase subunit E 1
P36897	TGFBR1	32	111	Snake toxin-like	1.68e-10	TGFR1_HUMAN TGF-beta receptor type-1
P36897	TGFBR1	180	492	Protein kinase-like (PK-like)	5.66e-71	TGFR1_HUMAN TGF-beta receptor type-1
P36955	SERPINF1	40	416	Serpins	8.9e-97	PEDF_HUMAN Pigment epithelium-derived factor
P38606	ATP6V1A	200	460	P-loop containing nucleoside triphosphate hydrolases	2.06e-81	VATA_HUMAN V-type proton ATPase catalytic subunit A
P38606	ATP6V1A	15	86	N-terminal domain of alpha and beta subunits of F1 ATP synthase	3.73e-16	VATA_HUMAN V-type proton ATPase catalytic subunit A
P38606	ATP6V1A	471	572	C-terminal domain of alpha and beta subunits of F1 ATP synthase	7.59e-26	VATA_HUMAN V-type proton ATPase catalytic subunit A
P42785	PRCP	115	459	alpha/beta-Hydrolases	2.28e-40	PCP_HUMAN Lysosomal Pro-X carboxypeptidase
P45877	PPIC	36	205	Cyclophilin-like	7.31e-71	PPIC_HUMAN Peptidyl-prolyl cis-trans isomerase C
P46459	NSF	222	486	P-loop containing nucleoside triphosphate hydrolases	5.02e-51	NSF_HUMAN Vesicle-fusing ATPase
P46459	NSF	498	733	P-loop containing nucleoside triphosphate hydrolases	1.37e-36	NSF_HUMAN Vesicle-fusing ATPase
P46459	NSF	87	200	Cdc48 domain 2-like	1.37e-36	NSF_HUMAN Vesicle-fusing ATPase
P46459	NSF	1	85	ADC-like	2.61e-30	NSF_HUMAN Vesicle-fusing ATPase
P46940	IQGAP1	1560	1657	RGC domain-like	7.45e-33	IQGA1_HUMAN Ras GTPase-activating-like protein IQGAP1
P46940	IQGAP1	632	835	P-loop containing nucleoside triphosphate hydrolases	1.01e-14	IQGA1_HUMAN Ras GTPase-activating-like protein IQGAP1
P46940	IQGAP1	970	1335	GTPase activation domain, GAP	1.37e-78	IQGA1_HUMAN Ras GTPase-activating-like protein IQGAP1
P46940	IQGAP1	36	200	Calponin-homology domain, CH-domain	2.36e-39	IQGA1_HUMAN Ras GTPase-activating-like protein IQGAP1
P48643	CCT5	157	416	GroEL-intermediate domain like	4.44e-30	TCPE_HUMAN T-complex protein 1 subunit epsilon
P48643	CCT5	25	533	GroEL equatorial domain-like	7.25e-84	TCPE_HUMAN T-complex protein 1 subunit epsilon
P48643	CCT5	221	389	GroEL apical domain-like	3.45e-54	TCPE_HUMAN T-complex protein 1 subunit epsilon
P48740	MASP1	409	696	Trypsin-like serine proteases	1.46e-78	MASP1_HUMAN Mannan-binding lectin serine protease 1
P48740	MASP1	24	138	Spermadhesin, CUB domain	1.06e-33	MASP1_HUMAN Mannan-binding lectin serine protease 1
P48740	MASP1	184	296	Spermadhesin, CUB domain	5.89e-32	MASP1_HUMAN Mannan-binding lectin serine protease 1
P48740	MASP1	134	182	EGF/Laminin	1.67e-08	MASP1_HUMAN Mannan-binding lectin serine protease 1
P48740	MASP1	300	370	Complement control module/SCR domain	1.2e-14	MASP1_HUMAN Mannan-binding lectin serine protease 1
P48740	MASP1	367	440	Complement control module/SCR domain	6.25e-15	MASP1_HUMAN Mannan-binding lectin serine protease 1
P49747	COMP	267	349	TSP type-3 repeat	2.22e-13	COMP_HUMAN Cartilage oligomeric matrix protein
P49747	COMP	337	408	TSP type-3 repeat	2.48e-14	COMP_HUMAN Cartilage oligomeric matrix protein
P49747	COMP	406	527	TSP type-3 repeat	2.35e-35	COMP_HUMAN Cartilage oligomeric matrix protein
P49747	COMP	91	230	Growth factor receptor domain	8.47e-06	COMP_HUMAN Cartilage oligomeric matrix protein
P49747	COMP	173	216	EGF/Laminin	5.19e-07	COMP_HUMAN Cartilage oligomeric matrix protein
P49747	COMP	529	744	Concanavalin A-like lectins/glucanases	1.58e-104	COMP_HUMAN Cartilage oligomeric matrix protein
P49747	COMP	28	73	Assembly domain of cartilage oligomeric matrix protein	2.62e-17	COMP_HUMAN Cartilage oligomeric matrix protein
P49748	ACADVL	88	340	Acyl-CoA dehydrogenase NM domain-like	9.42e-71	ACADV_HUMAN Very long-chain specific acyl-CoA dehydrogenase, mitochondrial
P49748	ACADVL	325	473	Acyl-CoA dehydrogenase C-terminal domain-like	2.42e-46	ACADV_HUMAN Very long-chain specific acyl-CoA dehydrogenase, mitochondrial
P49792	RANBP2	31	191	TPR-like	3.16e-14	RBP2_HUMAN E3 SUMO-protein ligase RanBP2
P49792	RANBP2	1415	1442	Ran binding protein zinc finger-like	8.44e-07	RBP2_HUMAN E3 SUMO-protein ligase RanBP2
P49792	RANBP2	1479	1506	Ran binding protein zinc finger-like	6.67e-07	RBP2_HUMAN E3 SUMO-protein ligase RanBP2
P49792	RANBP2	1543	1569	Ran binding protein zinc finger-like	3.84e-06	RBP2_HUMAN E3 SUMO-protein ligase RanBP2
P49792	RANBP2	1606	1632	Ran binding protein zinc finger-like	1.81e-07	RBP2_HUMAN E3 SUMO-protein ligase RanBP2
P49792	RANBP2	1665	1691	Ran binding protein zinc finger-like	1.81e-07	RBP2_HUMAN E3 SUMO-protein ligase RanBP2
P49792	RANBP2	1724	1750	Ran binding protein zinc finger-like	2.33e-06	RBP2_HUMAN E3 SUMO-protein ligase RanBP2
P49792	RANBP2	1782	1809	Ran binding protein zinc finger-like	2.75e-06	RBP2_HUMAN E3 SUMO-protein ligase RanBP2
P49792	RANBP2	1171	1303	PH domain-like	1.07e-47	RBP2_HUMAN E3 SUMO-protein ligase RanBP2
P49792	RANBP2	2012	2143	PH domain-like	8.15e-44	RBP2_HUMAN E3 SUMO-protein ligase RanBP2
P49792	RANBP2	2310	2440	PH domain-like	3.94e-45	RBP2_HUMAN E3 SUMO-protein ligase RanBP2
P49792	RANBP2	2907	3045	PH domain-like	3.44e-44	RBP2_HUMAN E3 SUMO-protein ligase RanBP2
P49792	RANBP2	3057	3224	Cyclophilin-like	5.55e-66	RBP2_HUMAN E3 SUMO-protein ligase RanBP2
P50148	GNAQ	67	186	Transducin (alpha subunit), insertion domain	1.57e-43	GNAQ_HUMAN Guanine nucleotide-binding protein G(q) subunit alpha
P50148	GNAQ	38	353	P-loop containing nucleoside triphosphate hydrolases	4.06e-59	GNAQ_HUMAN Guanine nucleotide-binding protein G(q) subunit alpha
P50552	VASP	340	378	Vasodilator-stimulated phosphoprotein, VASP, tetramerisation domain	8.63e-13	VASP_HUMAN Vasodilator-stimulated phosphoprotein
P50552	VASP	1	114	PH domain-like	5.7e-47	VASP_HUMAN Vasodilator-stimulated phosphoprotein
P50990	CCT8	156	407	GroEL-intermediate domain like	3.97e-21	TCPQ_HUMAN T-complex protein 1 subunit theta
P50990	CCT8	22	529	GroEL equatorial domain-like	8.06e-80	TCPQ_HUMAN T-complex protein 1 subunit theta
P50990	CCT8	215	379	GroEL apical domain-like	1.52e-43	TCPQ_HUMAN T-complex protein 1 subunit theta
P50991	CCT4	155	418	GroEL-intermediate domain like	6.41e-29	TCPD_HUMAN T-complex protein 1 subunit delta
P50991	CCT4	25	537	GroEL equatorial domain-like	5.36e-87	TCPD_HUMAN T-complex protein 1 subunit delta
P50991	CCT4	220	392	GroEL apical domain-like	6.7e-45	TCPD_HUMAN T-complex protein 1 subunit delta
P51149	RAB7A	5	182	P-loop containing nucleoside triphosphate hydrolases	1.16e-55	RAB7A_HUMAN Ras-related protein Rab-7a
P51151	RAB9A	5	190	P-loop containing nucleoside triphosphate hydrolases	6.79e-55	RAB9A_HUMAN Ras-related protein Rab-9A
P51153	RAB13	5	171	P-loop containing nucleoside triphosphate hydrolases	5.14e-63	RAB13_HUMAN Ras-related protein Rab-13
P51511	MMP15	53	116	PGBD-like	1.1e-20	MMP15_HUMAN Matrix metalloproteinase-15
P51511	MMP15	136	305	Metalloproteases ("zincins"), catalytic domain	5.73e-53	MMP15_HUMAN Matrix metalloproteinase-15
P51511	MMP15	362	559	Hemopexin-like domain	3.14e-69	MMP15_HUMAN Matrix metalloproteinase-15
P53675	CLTCL1	5	329	Clathrin heavy-chain terminal domain	4.18e-142	CLH2_HUMAN Clathrin heavy chain 2
P53675	CLTCL1	332	487	ARM repeat	2.59e-56	CLH2_HUMAN Clathrin heavy chain 2
P53675	CLTCL1	444	779	ARM repeat	8.34e-99	CLH2_HUMAN Clathrin heavy chain 2
P53675	CLTCL1	796	888	ARM repeat	2.88e-06	CLH2_HUMAN Clathrin heavy chain 2
P53675	CLTCL1	887	1045	ARM repeat	1.38e-34	CLH2_HUMAN Clathrin heavy chain 2
P53675	CLTCL1	1037	1180	ARM repeat	1.9e-29	CLH2_HUMAN Clathrin heavy chain 2
P53675	CLTCL1	1183	1516	ARM repeat	8.63e-114	CLH2_HUMAN Clathrin heavy chain 2
P53985	SLC16A1	20	445	MFS general substrate transporter	4.32e-61	MOT1_HUMAN Monocarboxylate transporter 1
P54803	GALC	55	355	(Trans)glycosidases	9e-46	GALC_HUMAN Galactocerebrosidase
P57729	RAB38	6	195	P-loop containing nucleoside triphosphate hydrolases	4.91e-48	RAB38_HUMAN Ras-related protein Rab-38
P60033	CD81	113	202	Tetraspanin	8.76e-25	CD81_HUMAN CD81 antigen
P61006	RAB8A	4	182	P-loop containing nucleoside triphosphate hydrolases	2.88e-62	RAB8A_HUMAN Ras-related protein Rab-8A
P61019	RAB2A	3	180	P-loop containing nucleoside triphosphate hydrolases	1.09e-59	RAB2A_HUMAN Ras-related protein Rab-2A
P61020	RAB5B	20	186	P-loop containing nucleoside triphosphate hydrolases	6.8e-56	RAB5B_HUMAN Ras-related protein Rab-5B
P61106	RAB14	8	182	P-loop containing nucleoside triphosphate hydrolases	1.64e-58	RAB14_HUMAN Ras-related protein Rab-14
P61204	ARF3	14	180	P-loop containing nucleoside triphosphate hydrolases	3.12e-58	ARF3_HUMAN ADP-ribosylation factor 3
P61224	RAP1B	2	165	P-loop containing nucleoside triphosphate hydrolases	1.13e-52	RAP1B_HUMAN Ras-related protein Rap-1b
P61225	RAP2B	2	166	P-loop containing nucleoside triphosphate hydrolases	1.17e-52	RAP2B_HUMAN Ras-related protein Rap-2b
P61421	ATP6V0D1	14	350	V-type ATP synthase subunit C	1.24e-89	VA0D1_HUMAN V-type proton ATPase subunit d 1
P61586	RHOA	6	179	P-loop containing nucleoside triphosphate hydrolases	5.44e-60	RHOA_HUMAN Transforming protein RhoA
P61769	B2M	22	117	Immunoglobulin	1.38e-22	B2MG_HUMAN Beta-2-microglobulin
P62491	RAB11A	7	188	P-loop containing nucleoside triphosphate hydrolases	3.38e-62	RB11A_HUMAN Ras-related protein Rab-11A
P62820	RAB1A	7	195	P-loop containing nucleoside triphosphate hydrolases	5.03e-68	RAB1A_HUMAN Ras-related protein Rab-1A
P62834	RAP1A	2	165	P-loop containing nucleoside triphosphate hydrolases	9.19e-52	RAP1A_HUMAN Ras-related protein Rap-1A
P62873	GNB1	4	340	WD40 repeat-like	5.98e-83	GBB1_HUMAN Guanine nucleotide-binding protein G(I)/G(S)/G(T) subunit beta-1
P62879	GNB2	3	340	WD40 repeat-like	1.19e-79	GBB2_HUMAN Guanine nucleotide-binding protein G(I)/G(S)/G(T) subunit beta-2
P63092	GNAS	87	201	Transducin (alpha subunit), insertion domain	3.4e-35	GNAS2_HUMAN Guanine nucleotide-binding protein G(s) subunit alpha isoforms short
P63092	GNAS	38	392	P-loop containing nucleoside triphosphate hydrolases	9.11e-65	GNAS2_HUMAN Guanine nucleotide-binding protein G(s) subunit alpha isoforms short
P69905	HBA1	3	142	Globin-like	1.68e-55	HBA_HUMAN Hemoglobin subunit alpha
P78368	CSNK1G2	42	329	Protein kinase-like (PK-like)	2.91e-80	KC1G2_HUMAN Casein kinase I isoform gamma-2
P84085	ARF5	14	177	P-loop containing nucleoside triphosphate hydrolases	6.53e-56	ARF5_HUMAN ADP-ribosylation factor 5
P98196	ATP11A	419	659	Metal cation-transporting ATPase, ATP-binding domain N	2.83e-21	AT11A_HUMAN Probable phospholipid-transporting ATPase IH
P98196	ATP11A	400	866	HAD-like	1.84e-33	AT11A_HUMAN Probable phospholipid-transporting ATPase IH
P98196	ATP11A	43	1102	Calcium ATPase, transmembrane domain M	4.18e-57	AT11A_HUMAN Probable phospholipid-transporting ATPase IH
P98196	ATP11A	129	277	Calcium ATPase, transduction domain A	5.1e-16	AT11A_HUMAN Probable phospholipid-transporting ATPase IH
Q00688	FKBP3	113	223	FKBP-like	3.24e-53	FKBP3_HUMAN Peptidyl-prolyl cis-trans isomerase FKBP3
Q01082	SPTBN1	295	416	Spectrin repeat	7.72e-36	SPTB2_HUMAN Spectrin beta chain, non-erythrocytic 1
Q01082	SPTBN1	425	528	Spectrin repeat	1.7e-23	SPTB2_HUMAN Spectrin beta chain, non-erythrocytic 1
Q01082	SPTBN1	529	637	Spectrin repeat	7.85e-22	SPTB2_HUMAN Spectrin beta chain, non-erythrocytic 1
Q01082	SPTBN1	603	729	Spectrin repeat	1.44e-28	SPTB2_HUMAN Spectrin beta chain, non-erythrocytic 1
Q01082	SPTBN1	694	814	Spectrin repeat	3.4e-24	SPTB2_HUMAN Spectrin beta chain, non-erythrocytic 1
Q01082	SPTBN1	812	951	Spectrin repeat	3.53e-26	SPTB2_HUMAN Spectrin beta chain, non-erythrocytic 1
Q01082	SPTBN1	1011	1165	Spectrin repeat	3.6e-29	SPTB2_HUMAN Spectrin beta chain, non-erythrocytic 1
Q01082	SPTBN1	1223	1376	Spectrin repeat	6.86e-28	SPTB2_HUMAN Spectrin beta chain, non-erythrocytic 1
Q01082	SPTBN1	1384	1482	Spectrin repeat	9.95e-18	SPTB2_HUMAN Spectrin beta chain, non-erythrocytic 1
Q01082	SPTBN1	1453	1590	Spectrin repeat	1.2e-24	SPTB2_HUMAN Spectrin beta chain, non-erythrocytic 1
Q01082	SPTBN1	1595	1696	Spectrin repeat	2.75e-22	SPTB2_HUMAN Spectrin beta chain, non-erythrocytic 1
Q01082	SPTBN1	1699	1804	Spectrin repeat	8.51e-23	SPTB2_HUMAN Spectrin beta chain, non-erythrocytic 1
Q01082	SPTBN1	1859	2013	Spectrin repeat	2.26e-27	SPTB2_HUMAN Spectrin beta chain, non-erythrocytic 1
Q01082	SPTBN1	1986	2079	Spectrin repeat	9.95e-15	SPTB2_HUMAN Spectrin beta chain, non-erythrocytic 1
Q01082	SPTBN1	2191	2310	PH domain-like	4.37e-38	SPTB2_HUMAN Spectrin beta chain, non-erythrocytic 1
Q01082	SPTBN1	14	279	Calponin-homology domain, CH-domain	8.35e-92	SPTB2_HUMAN Spectrin beta chain, non-erythrocytic 1
Q01970	PLCB3	318	707	PLC-like phosphodiesterases	1.64e-130	PLCB3_HUMAN 1-phosphatidylinositol 4,5-bisphosphate phosphodiesterase beta-3
Q01970	PLCB3	17	146	PH domain-like	2.83e-43	PLCB3_HUMAN 1-phosphatidylinositol 4,5-bisphosphate phosphodiesterase beta-3
Q01970	PLCB3	148	314	EF-hand	8.85e-51	PLCB3_HUMAN 1-phosphatidylinositol 4,5-bisphosphate phosphodiesterase beta-3
Q01970	PLCB3	939	1198	C-terminal domain of PLC-beta	4.18e-63	PLCB3_HUMAN 1-phosphatidylinositol 4,5-bisphosphate phosphodiesterase beta-3
Q01970	PLCB3	728	841	C2 domain (Calcium/lipid-binding domain, CaLB)	3.13e-23	PLCB3_HUMAN 1-phosphatidylinositol 4,5-bisphosphate phosphodiesterase beta-3
Q02790	FKBP4	258	414	TPR-like	6.64e-34	FKBP4_HUMAN Peptidyl-prolyl cis-trans isomerase FKBP4
Q02790	FKBP4	29	148	FKBP-like	2.36e-43	FKBP4_HUMAN Peptidyl-prolyl cis-trans isomerase FKBP4
Q02790	FKBP4	142	257	FKBP-like	6.09e-28	FKBP4_HUMAN Peptidyl-prolyl cis-trans isomerase FKBP4
Q02809	PLOD1	304	601	Nucleotide-diphospho-sugar transferases	2.81e-11	PLOD1_HUMAN Procollagen-lysine,2-oxoglutarate 5-dioxygenase 1
Q05639	EEF1A2	238	331	Translation proteins	1.61e-60	EF1A2_HUMAN Elongation factor 1-alpha 2
Q05639	EEF1A2	3	261	P-loop containing nucleoside triphosphate hydrolases	2.98e-80	EF1A2_HUMAN Elongation factor 1-alpha 2
Q05639	EEF1A2	339	441	EF-Tu/eEF-1alpha/eIF2-gamma C-terminal domain	3.49e-59	EF1A2_HUMAN Elongation factor 1-alpha 2
Q06033	ITIH3	231	471	vWA-like	5.5e-35	ITIH3_HUMAN Inter-alpha-trypsin inhibitor heavy chain H3
Q12805	EFEMP1	212	334	Growth factor receptor domain	3.22e-17	FBLN3_HUMAN EGF-containing fibulin-like extracellular matrix protein 1
Q12805	EFEMP1	170	220	EGF/Laminin	1.82e-10	FBLN3_HUMAN EGF-containing fibulin-like extracellular matrix protein 1
Q12846	STX4	38	255	t-snare proteins	2.59e-52	STX4_HUMAN Syntaxin-4
Q12891	HYAL2	35	357	(Trans)glycosidases	2.95e-123	HYAL2_HUMAN Hyaluronidase-2
Q12974	PTP4A2	5	159	(Phosphotyrosine protein) phosphatases II	1.77e-42	TP4A2_HUMAN Protein tyrosine phosphatase type IVA 2
Q13214	SEMA3B	29	518	Sema domain	1.83e-182	SEM3B_HUMAN Semaphorin-3B
Q13214	SEMA3B	515	566	Plexin repeat	4.19e-10	SEM3B_HUMAN Semaphorin-3B
Q13214	SEMA3B	580	662	Immunoglobulin	2.25e-08	SEM3B_HUMAN Semaphorin-3B
Q13443	ADAM9	211	404	Metalloproteases ("zincins"), catalytic domain	1.86e-63	ADAM9_HUMAN Disintegrin and metalloproteinase domain-containing protein 9
Q13443	ADAM9	423	499	Blood coagulation inhibitor (disintegrin)	1.22e-19	ADAM9_HUMAN Disintegrin and metalloproteinase domain-containing protein 9
Q13492	PICALM	153	283	GAT-like domain	5.89e-48	PICAL_HUMAN Phosphatidylinositol-binding clathrin assembly protein
Q13492	PICALM	23	148	ENTH/VHS domain	1.6e-44	PICAL_HUMAN Phosphatidylinositol-binding clathrin assembly protein
Q13505	MTX1	296	389	GST C-terminal domain-like	3.03e-09	MTX1_HUMAN Metaxin-1
Q13616	CUL1	687	776	Winged helix DNA-binding domain	5.47e-30	CUL1_HUMAN Cullin-1
Q13616	CUL1	17	411	Cullin repeat-like	5.64e-174	CUL1_HUMAN Cullin-1
Q13616	CUL1	413	686	Cullin homology domain	3.15e-105	CUL1_HUMAN Cullin-1
Q13637	RAB32	21	208	P-loop containing nucleoside triphosphate hydrolases	1.58e-48	RAB32_HUMAN Ras-related protein Rab-32
Q13642	FHL1	7	71	Glucocorticoid receptor-like (DNA-binding domain)	7.37e-13	FHL1_HUMAN Four and a half LIM domains protein 1
Q13642	FHL1	67	133	Glucocorticoid receptor-like (DNA-binding domain)	3.79e-13	FHL1_HUMAN Four and a half LIM domains protein 1
Q13642	FHL1	129	191	Glucocorticoid receptor-like (DNA-binding domain)	1.95e-17	FHL1_HUMAN Four and a half LIM domains protein 1
Q13642	FHL1	188	233	Glucocorticoid receptor-like (DNA-binding domain)	1.27e-12	FHL1_HUMAN Four and a half LIM domains protein 1
Q14103	HNRNPD	96	178	RNA-binding domain, RBD	6.58e-26	HNRPD_HUMAN Heterogeneous nuclear ribonucleoprotein D0
Q14103	HNRNPD	178	287	RNA-binding domain, RBD	1.1e-26	HNRPD_HUMAN Heterogeneous nuclear ribonucleoprotein D0
Q14160	SCRIB	719	814	PDZ domain-like	9.6e-25	SCRIB_HUMAN Protein scribble homolog
Q14160	SCRIB	846	957	PDZ domain-like	1.22e-25	SCRIB_HUMAN Protein scribble homolog
Q14160	SCRIB	1002	1094	PDZ domain-like	2.63e-24	SCRIB_HUMAN Protein scribble homolog
Q14160	SCRIB	1096	1191	PDZ domain-like	2.23e-23	SCRIB_HUMAN Protein scribble homolog
Q14160	SCRIB	11	278	L domain-like	1.87e-51	SCRIB_HUMAN Protein scribble homolog
Q14160	SCRIB	239	392	L domain-like	3.23e-28	SCRIB_HUMAN Protein scribble homolog
Q14168	MPP2	227	359	SH3-domain	4.99e-33	MPP2_HUMAN MAGUK p55 subfamily member 2
Q14168	MPP2	369	572	P-loop containing nucleoside triphosphate hydrolases	1.66e-53	MPP2_HUMAN MAGUK p55 subfamily member 2
Q14168	MPP2	141	244	PDZ domain-like	1.06e-16	MPP2_HUMAN MAGUK p55 subfamily member 2
Q14168	MPP2	89	142	L27 domain	2.59e-13	MPP2_HUMAN MAGUK p55 subfamily member 2
Q14254	FLOT2	36	178	Band 7/SPFH domain	1.44e-37	FLOT2_HUMAN Flotillin-2
Q14623	IHH	203	349	Hedgehog/intein (Hint) domain	1.01e-39	IHH_HUMAN Indian hedgehog protein
Q14623	IHH	43	198	Hedgehog/DD-peptidase	3.34e-83	IHH_HUMAN Indian hedgehog protein
Q14766	LTBP1	552	622	TB module/8-cys domain	2.75e-12	LTBP1_HUMAN Latent-transforming growth factor beta-binding protein 1
Q14766	LTBP1	672	739	TB module/8-cys domain	5.76e-20	LTBP1_HUMAN Latent-transforming growth factor beta-binding protein 1
Q14766	LTBP1	1344	1410	TB module/8-cys domain	2.22e-20	LTBP1_HUMAN Latent-transforming growth factor beta-binding protein 1
Q14766	LTBP1	1518	1579	TB module/8-cys domain	4.05e-17	LTBP1_HUMAN Latent-transforming growth factor beta-binding protein 1
Q14766	LTBP1	875	958	Growth factor receptor domain	1.73e-10	LTBP1_HUMAN Latent-transforming growth factor beta-binding protein 1
Q14766	LTBP1	931	1037	Growth factor receptor domain	1.08e-11	LTBP1_HUMAN Latent-transforming growth factor beta-binding protein 1
Q14766	LTBP1	1005	1124	Growth factor receptor domain	1.27e-12	LTBP1_HUMAN Latent-transforming growth factor beta-binding protein 1
Q14766	LTBP1	1125	1251	Growth factor receptor domain	6.91e-16	LTBP1_HUMAN Latent-transforming growth factor beta-binding protein 1
Q14766	LTBP1	1621	1707	Growth factor receptor domain	1.16e-08	LTBP1_HUMAN Latent-transforming growth factor beta-binding protein 1
Q14766	LTBP1	403	435	EGF/Laminin	8.37e-06	LTBP1_HUMAN Latent-transforming growth factor beta-binding protein 1
Q14766	LTBP1	618	666	EGF/Laminin	1.16e-09	LTBP1_HUMAN Latent-transforming growth factor beta-binding protein 1
Q14766	LTBP1	1244	1297	EGF/Laminin	4.31e-10	LTBP1_HUMAN Latent-transforming growth factor beta-binding protein 1
Q14766	LTBP1	1422	1471	EGF/Laminin	2.72e-06	LTBP1_HUMAN Latent-transforming growth factor beta-binding protein 1
Q14766	LTBP1	1462	1507	EGF/Laminin	1.06e-07	LTBP1_HUMAN Latent-transforming growth factor beta-binding protein 1
Q15056	EIF4H	34	147	RNA-binding domain, RBD	1.36e-23	IF4H_HUMAN Eukaryotic translation initiation factor 4H
Q15149	PLEC	412	528	Spectrin repeat	5.76e-22	PLEC_HUMAN Plectin
Q15149	PLEC	661	754	Spectrin repeat	6.15e-10	PLEC_HUMAN Plectin
Q15149	PLEC	755	857	Spectrin repeat	7.46e-17	PLEC_HUMAN Plectin
Q15149	PLEC	848	934	Spectrin repeat	5.18e-06	PLEC_HUMAN Plectin
Q15149	PLEC	1289	1474	Spectrin repeat	1.08e-19	PLEC_HUMAN Plectin
Q15149	PLEC	2783	3023	Plakin repeat	8.11e-86	PLEC_HUMAN Plectin
Q15149	PLEC	3111	3350	Plakin repeat	9.02e-76	PLEC_HUMAN Plectin
Q15149	PLEC	3442	3680	Plakin repeat	3.92e-86	PLEC_HUMAN Plectin
Q15149	PLEC	3779	4016	Plakin repeat	6.8e-76	PLEC_HUMAN Plectin
Q15149	PLEC	4021	4259	Plakin repeat	1.7e-87	PLEC_HUMAN Plectin
Q15149	PLEC	4279	4327	Plakin repeat	2.35e-10	PLEC_HUMAN Plectin
Q15149	PLEC	4332	4602	Plakin repeat	3.84e-70	PLEC_HUMAN Plectin
Q15149	PLEC	173	396	Calponin-homology domain, CH-domain	2.99e-86	PLEC_HUMAN Plectin
Q15286	RAB35	4	186	P-loop containing nucleoside triphosphate hydrolases	2.77e-63	RAB35_HUMAN Ras-related protein Rab-35
Q15386	UBE3C	720	1076	Hect, E3 ligase catalytic domain	8.24e-111	UBE3C_HUMAN Ubiquitin-protein ligase E3C
Q15465	SHH	198	365	Hedgehog/intein (Hint) domain	5.97e-37	SHH_HUMAN Sonic hedgehog protein
Q15465	SHH	38	193	Hedgehog/DD-peptidase	6.47e-85	SHH_HUMAN Sonic hedgehog protein
Q16625	OCLN	416	520	occludin/ELL-like	9.15e-33	OCLN_HUMAN Occludin
Q16625	OCLN	58	270	MFS general substrate transporter	8.37e-05	OCLN_HUMAN Occludin
Q5H9U9	DDX60L	756	1324	P-loop containing nucleoside triphosphate hydrolases	8.67e-31	DDX6L_HUMAN Probable ATP-dependent RNA helicase DDX60-like
Q5SQS7	SH2D4B	294	401	SH2 domain	2.02e-26	SH24B_HUMAN SH2 domain-containing protein 4B
Q5T2T1	MPP7	204	350	SH3-domain	5.91e-29	MPP7_HUMAN MAGUK p55 subfamily member 7
Q5T2T1	MPP7	366	571	P-loop containing nucleoside triphosphate hydrolases	1.46e-59	MPP7_HUMAN MAGUK p55 subfamily member 7
Q5T2T1	MPP7	115	221	PDZ domain-like	3.42e-21	MPP7_HUMAN MAGUK p55 subfamily member 7
Q5T2T1	MPP7	71	122	L27 domain	1.02e-12	MPP7_HUMAN MAGUK p55 subfamily member 7
Q658P3	STEAP3	30	217	NAD(P)-binding Rossmann-fold domains	3.83e-35	STEA3_HUMAN Metalloreductase STEAP3
Q6N069	NAA16	53	470	TPR-like	9.17e-22	NAA16_HUMAN N-alpha-acetyltransferase 16, NatA auxiliary subunit
Q6PJF5	RHBDF2	400	791	Rhomboid-like	1.22e-36	RHDF2_HUMAN Inactive rhomboid protein 2
Q6PJG6	BRAT1	7	675	ARM repeat	5.42e-32	BRAT1_HUMAN BRCA1-associated ATM activator 1
Q6XYQ8	SYT10	226	337	C2 domain (Calcium/lipid-binding domain, CaLB)	7.09e-39	SYT10_HUMAN Synaptotagmin-10
Q6XYQ8	SYT10	364	499	C2 domain (Calcium/lipid-binding domain, CaLB)	3.41e-40	SYT10_HUMAN Synaptotagmin-10
Q709F0	ACAD11	25	353	Protein kinase-like (PK-like)	6.95e-49	ACD11_HUMAN Acyl-CoA dehydrogenase family member 11
Q709F0	ACAD11	413	631	Acyl-CoA dehydrogenase NM domain-like	7.2e-56	ACD11_HUMAN Acyl-CoA dehydrogenase family member 11
Q709F0	ACAD11	616	771	Acyl-CoA dehydrogenase C-terminal domain-like	3.54e-40	ACD11_HUMAN Acyl-CoA dehydrogenase family member 11
Q7L1W4	LRRC8D	475	825	L domain-like	5.51e-53	LRC8D_HUMAN Leucine-rich repeat-containing protein 8D
Q7Z406	MYH14	78	859	P-loop containing nucleoside triphosphate hydrolases	3.9e-277	MYH14_HUMAN Myosin-14
Q7Z406	MYH14	860	985	Myosin rod fragments	4.45e-15	MYH14_HUMAN Myosin-14
Q7Z406	MYH14	979	1093	Myosin rod fragments	5.49e-20	MYH14_HUMAN Myosin-14
Q7Z406	MYH14	1258	1375	Myosin rod fragments	3.14e-16	MYH14_HUMAN Myosin-14
Q7Z406	MYH14	1538	1651	Myosin rod fragments	4.97e-06	MYH14_HUMAN Myosin-14
Q7Z406	MYH14	1735	1851	Myosin rod fragments	1.18e-05	MYH14_HUMAN Myosin-14
Q86X29	LSR	91	224	Immunoglobulin	4.47e-09	LSR_HUMAN Lipolysis-stimulated lipoprotein receptor
Q86Y82	STX12	18	233	t-snare proteins	3.02e-47	STX12_HUMAN Syntaxin-12
Q8IXU6	SLC35F2	103	180	Multidrug resistance efflux transporter EmrE	1.31e-07	S35F2_HUMAN Solute carrier family 35 member F2
Q8IZF3	GPR115	378	687	Family A G protein-coupled receptor-like	7.42e-05	GP115_HUMAN Probable G-protein coupled receptor 115
Q8N1F8	STK11IP	164	301	Outer arm dynein light chain 1	6.15e-25	S11IP_HUMAN Serine/threonine-protein kinase 11-interacting protein
Q8N357	SLC35F6	83	162	Multidrug resistance efflux transporter EmrE	1.27e-09	S35F6_HUMAN Solute carrier family 35 member F6
Q8N4S9	MARVELD2	442	550	occludin/ELL-like	1.44e-36	MALD2_HUMAN MARVEL domain-containing protein 2
Q8NB49	ATP11C	416	655	Metal cation-transporting ATPase, ATP-binding domain N	4.8e-20	AT11C_HUMAN Probable phospholipid-transporting ATPase IG
Q8NB49	ATP11C	398	861	HAD-like	2.25e-32	AT11C_HUMAN Probable phospholipid-transporting ATPase IG
Q8NB49	ATP11C	39	1090	Calcium ATPase, transmembrane domain M	1.05e-51	AT11C_HUMAN Probable phospholipid-transporting ATPase IG
Q8NB49	ATP11C	126	274	Calcium ATPase, transduction domain A	1.15e-15	AT11C_HUMAN Probable phospholipid-transporting ATPase IG
Q8NET8	TRPV3	148	366	Ankyrin repeat	4.56e-23	TRPV3_HUMAN Transient receptor potential cation channel subfamily V member 3
Q8TF71	SLC16A10	57	477	MFS general substrate transporter	2.88e-47	MOT10_HUMAN Monocarboxylate transporter 10
Q8WZ42	TTN	32174	32462	Protein kinase-like (PK-like)	5.92e-70	TITIN_HUMAN Titin
Q8WZ42	TTN	6	99	Immunoglobulin	1.96e-21	TITIN_HUMAN Titin
Q8WZ42	TTN	102	195	Immunoglobulin	9e-22	TITIN_HUMAN Titin
Q8WZ42	TTN	941	1033	Immunoglobulin	7.69e-25	TITIN_HUMAN Titin
Q8WZ42	TTN	1082	1171	Immunoglobulin	5.72e-19	TITIN_HUMAN Titin
Q8WZ42	TTN	1293	1383	Immunoglobulin	4.81e-19	TITIN_HUMAN Titin
Q8WZ42	TTN	1455	1548	Immunoglobulin	1.2e-18	TITIN_HUMAN Titin
Q8WZ42	TTN	1556	1649	Immunoglobulin	7.12e-16	TITIN_HUMAN Titin
Q8WZ42	TTN	1701	1796	Immunoglobulin	1.79e-15	TITIN_HUMAN Titin
Q8WZ42	TTN	1839	1932	Immunoglobulin	6.98e-18	TITIN_HUMAN Titin
Q8WZ42	TTN	2076	2170	Immunoglobulin	6.77e-19	TITIN_HUMAN Titin
Q8WZ42	TTN	2165	2263	Immunoglobulin	2.58e-15	TITIN_HUMAN Titin
Q8WZ42	TTN	2269	2356	Immunoglobulin	2.92e-13	TITIN_HUMAN Titin
Q8WZ42	TTN	2354	2428	Immunoglobulin	4.89e-12	TITIN_HUMAN Titin
Q8WZ42	TTN	2447	2532	Immunoglobulin	1.69e-14	TITIN_HUMAN Titin
Q8WZ42	TTN	2535	2619	Immunoglobulin	1.62e-12	TITIN_HUMAN Titin
Q8WZ42	TTN	2626	2705	Immunoglobulin	3.79e-12	TITIN_HUMAN Titin
Q8WZ42	TTN	2705	2786	Immunoglobulin	1.4e-10	TITIN_HUMAN Titin
Q8WZ42	TTN	2797	2880	Immunoglobulin	1.23e-14	TITIN_HUMAN Titin
Q8WZ42	TTN	2884	2967	Immunoglobulin	7.34e-16	TITIN_HUMAN Titin
Q8WZ42	TTN	2971	3056	Immunoglobulin	7.16e-14	TITIN_HUMAN Titin
Q8WZ42	TTN	3050	3143	Immunoglobulin	5.12e-18	TITIN_HUMAN Titin
Q8WZ42	TTN	3139	3234	Immunoglobulin	5.11e-10	TITIN_HUMAN Titin
Q8WZ42	TTN	3237	3330	Immunoglobulin	7.31e-22	TITIN_HUMAN Titin
Q8WZ42	TTN	3342	3433	Immunoglobulin	8.66e-21	TITIN_HUMAN Titin
Q8WZ42	TTN	3503	3594	Immunoglobulin	6.91e-22	TITIN_HUMAN Titin
Q8WZ42	TTN	3621	3712	Immunoglobulin	4.63e-18	TITIN_HUMAN Titin
Q8WZ42	TTN	4289	4379	Immunoglobulin	9.86e-13	TITIN_HUMAN Titin
Q8WZ42	TTN	4383	4474	Immunoglobulin	2.51e-21	TITIN_HUMAN Titin
Q8WZ42	TTN	4478	4575	Immunoglobulin	1.4e-21	TITIN_HUMAN Titin
Q8WZ42	TTN	4571	4668	Immunoglobulin	4.65e-24	TITIN_HUMAN Titin
Q8WZ42	TTN	4664	4762	Immunoglobulin	8.2e-24	TITIN_HUMAN Titin
Q8WZ42	TTN	4755	4843	Immunoglobulin	2.71e-17	TITIN_HUMAN Titin
Q8WZ42	TTN	4851	4946	Immunoglobulin	1.26e-19	TITIN_HUMAN Titin
Q8WZ42	TTN	4946	5036	Immunoglobulin	1.73e-18	TITIN_HUMAN Titin
Q8WZ42	TTN	5040	5139	Immunoglobulin	1.94e-23	TITIN_HUMAN Titin
Q8WZ42	TTN	5133	5230	Immunoglobulin	1.15e-18	TITIN_HUMAN Titin
Q8WZ42	TTN	5230	5321	Immunoglobulin	1.03e-20	TITIN_HUMAN Titin
Q8WZ42	TTN	5320	5417	Immunoglobulin	3.06e-21	TITIN_HUMAN Titin
Q8WZ42	TTN	5413	5507	Immunoglobulin	1.91e-18	TITIN_HUMAN Titin
Q8WZ42	TTN	5508	5597	Immunoglobulin	4.5e-19	TITIN_HUMAN Titin
Q8WZ42	TTN	5602	5701	Immunoglobulin	2.08e-23	TITIN_HUMAN Titin
Q8WZ42	TTN	5695	5794	Immunoglobulin	1.34e-20	TITIN_HUMAN Titin
Q8WZ42	TTN	5785	5882	Immunoglobulin	3.23e-22	TITIN_HUMAN Titin
Q8WZ42	TTN	5882	5979	Immunoglobulin	4.35e-24	TITIN_HUMAN Titin
Q8WZ42	TTN	5975	6070	Immunoglobulin	4.56e-21	TITIN_HUMAN Titin
Q8WZ42	TTN	6070	6163	Immunoglobulin	1.93e-21	TITIN_HUMAN Titin
Q8WZ42	TTN	6164	6263	Immunoglobulin	3.21e-23	TITIN_HUMAN Titin
Q8WZ42	TTN	6257	6355	Immunoglobulin	6.51e-21	TITIN_HUMAN Titin
Q8WZ42	TTN	6350	6446	Immunoglobulin	8.53e-22	TITIN_HUMAN Titin
Q8WZ42	TTN	6440	6539	Immunoglobulin	1.08e-21	TITIN_HUMAN Titin
Q8WZ42	TTN	6537	6633	Immunoglobulin	1.92e-17	TITIN_HUMAN Titin
Q8WZ42	TTN	6633	6727	Immunoglobulin	3.08e-23	TITIN_HUMAN Titin
Q8WZ42	TTN	6727	6826	Immunoglobulin	1.95e-22	TITIN_HUMAN Titin
Q8WZ42	TTN	6820	6912	Immunoglobulin	2.79e-21	TITIN_HUMAN Titin
Q8WZ42	TTN	6915	7008	Immunoglobulin	1.6e-18	TITIN_HUMAN Titin
Q8WZ42	TTN	7006	7101	Immunoglobulin	5.56e-23	TITIN_HUMAN Titin
Q8WZ42	TTN	7099	7194	Immunoglobulin	1.92e-20	TITIN_HUMAN Titin
Q8WZ42	TTN	7198	7296	Immunoglobulin	3.09e-26	TITIN_HUMAN Titin
Q8WZ42	TTN	7291	7386	Immunoglobulin	2.78e-23	TITIN_HUMAN Titin
Q8WZ42	TTN	7385	7482	Immunoglobulin	9.39e-25	TITIN_HUMAN Titin
Q8WZ42	TTN	7478	7578	Immunoglobulin	1.29e-18	TITIN_HUMAN Titin
Q8WZ42	TTN	7573	7663	Immunoglobulin	5.07e-20	TITIN_HUMAN Titin
Q8WZ42	TTN	7668	7766	Immunoglobulin	5.02e-24	TITIN_HUMAN Titin
Q8WZ42	TTN	7761	7854	Immunoglobulin	3.86e-19	TITIN_HUMAN Titin
Q8WZ42	TTN	7855	7950	Immunoglobulin	1.26e-19	TITIN_HUMAN Titin
Q8WZ42	TTN	7943	8037	Immunoglobulin	1.54e-21	TITIN_HUMAN Titin
Q8WZ42	TTN	8041	8132	Immunoglobulin	3.54e-18	TITIN_HUMAN Titin
Q8WZ42	TTN	8139	8237	Immunoglobulin	4.89e-24	TITIN_HUMAN Titin
Q8WZ42	TTN	8232	8332	Immunoglobulin	4.66e-22	TITIN_HUMAN Titin
Q8WZ42	TTN	8326	8419	Immunoglobulin	1.12e-21	TITIN_HUMAN Titin
Q8WZ42	TTN	8419	8519	Immunoglobulin	3.12e-20	TITIN_HUMAN Titin
Q8WZ42	TTN	8514	8608	Immunoglobulin	9.62e-24	TITIN_HUMAN Titin
Q8WZ42	TTN	8609	8708	Immunoglobulin	1.69e-25	TITIN_HUMAN Titin
Q8WZ42	TTN	8702	8796	Immunoglobulin	1.33e-21	TITIN_HUMAN Titin
Q8WZ42	TTN	8796	8891	Immunoglobulin	4.37e-21	TITIN_HUMAN Titin
Q8WZ42	TTN	8888	8983	Immunoglobulin	2.64e-23	TITIN_HUMAN Titin
Q8WZ42	TTN	8984	9077	Immunoglobulin	3.04e-20	TITIN_HUMAN Titin
Q8WZ42	TTN	9080	9172	Immunoglobulin	7.67e-23	TITIN_HUMAN Titin
Q8WZ42	TTN	9176	9273	Immunoglobulin	3.69e-19	TITIN_HUMAN Titin
Q8WZ42	TTN	9272	9368	Immunoglobulin	2.8e-22	TITIN_HUMAN Titin
Q8WZ42	TTN	9383	9474	Immunoglobulin	1.71e-20	TITIN_HUMAN Titin
Q8WZ42	TTN	9585	9672	Immunoglobulin	2.03e-14	TITIN_HUMAN Titin
Q8WZ42	TTN	9672	9760	Immunoglobulin	9.26e-17	TITIN_HUMAN Titin
Q8WZ42	TTN	9754	9850	Immunoglobulin	6.41e-18	TITIN_HUMAN Titin
Q8WZ42	TTN	12058	12141	Immunoglobulin	2.14e-16	TITIN_HUMAN Titin
Q8WZ42	TTN	12131	12228	Immunoglobulin	1.64e-11	TITIN_HUMAN Titin
Q8WZ42	TTN	12235	12311	Immunoglobulin	1.38e-09	TITIN_HUMAN Titin
Q8WZ42	TTN	12327	12410	Immunoglobulin	5.42e-07	TITIN_HUMAN Titin
Q8WZ42	TTN	12415	12498	Immunoglobulin	3.28e-11	TITIN_HUMAN Titin
Q8WZ42	TTN	12502	12588	Immunoglobulin	7.82e-14	TITIN_HUMAN Titin
Q8WZ42	TTN	12590	12676	Immunoglobulin	1.98e-17	TITIN_HUMAN Titin
Q8WZ42	TTN	12681	12764	Immunoglobulin	6.94e-10	TITIN_HUMAN Titin
Q8WZ42	TTN	12765	12848	Immunoglobulin	9.58e-15	TITIN_HUMAN Titin
Q8WZ42	TTN	12855	12940	Immunoglobulin	1.37e-10	TITIN_HUMAN Titin
Q8WZ42	TTN	12945	13037	Immunoglobulin	1.06e-16	TITIN_HUMAN Titin
Q8WZ42	TTN	13037	13119	Immunoglobulin	5.98e-07	TITIN_HUMAN Titin
Q8WZ42	TTN	13126	13217	Immunoglobulin	3.42e-16	TITIN_HUMAN Titin
Q8WZ42	TTN	13204	13297	Immunoglobulin	1.61e-21	TITIN_HUMAN Titin
Q8WZ42	TTN	13303	13387	Immunoglobulin	2.18e-15	TITIN_HUMAN Titin
Q8WZ42	TTN	13388	13465	Immunoglobulin	4.09e-16	TITIN_HUMAN Titin
Q8WZ42	TTN	13481	13566	Immunoglobulin	6.97e-15	TITIN_HUMAN Titin
Q8WZ42	TTN	13568	13660	Immunoglobulin	5.86e-14	TITIN_HUMAN Titin
Q8WZ42	TTN	13663	13751	Immunoglobulin	2.8e-15	TITIN_HUMAN Titin
Q8WZ42	TTN	13745	13834	Immunoglobulin	1.94e-16	TITIN_HUMAN Titin
Q8WZ42	TTN	13836	13916	Immunoglobulin	3.7e-11	TITIN_HUMAN Titin
Q8WZ42	TTN	13927	14022	Immunoglobulin	3.4e-13	TITIN_HUMAN Titin
Q8WZ42	TTN	14331	14420	Immunoglobulin	9.79e-14	TITIN_HUMAN Titin
Q8WZ42	TTN	14624	14714	Immunoglobulin	4.81e-19	TITIN_HUMAN Titin
Q8WZ42	TTN	15314	15412	Immunoglobulin	4.42e-20	TITIN_HUMAN Titin
Q8WZ42	TTN	15614	15734	Immunoglobulin	7.66e-13	TITIN_HUMAN Titin
Q8WZ42	TTN	16041	16129	Immunoglobulin	8.69e-15	TITIN_HUMAN Titin
Q8WZ42	TTN	16333	16430	Immunoglobulin	4.18e-17	TITIN_HUMAN Titin
Q8WZ42	TTN	16747	16844	Immunoglobulin	8.46e-13	TITIN_HUMAN Titin
Q8WZ42	TTN	17051	17150	Immunoglobulin	1.15e-18	TITIN_HUMAN Titin
Q8WZ42	TTN	17460	17549	Immunoglobulin	4.52e-15	TITIN_HUMAN Titin
Q8WZ42	TTN	17753	17845	Immunoglobulin	5.83e-18	TITIN_HUMAN Titin
Q8WZ42	TTN	18153	18242	Immunoglobulin	1.17e-16	TITIN_HUMAN Titin
Q8WZ42	TTN	18443	18537	Immunoglobulin	4.83e-22	TITIN_HUMAN Titin
Q8WZ42	TTN	18844	18934	Immunoglobulin	3.44e-17	TITIN_HUMAN Titin
Q8WZ42	TTN	19132	19229	Immunoglobulin	5.35e-17	TITIN_HUMAN Titin
Q8WZ42	TTN	19542	19630	Immunoglobulin	1.5e-12	TITIN_HUMAN Titin
Q8WZ42	TTN	19826	19925	Immunoglobulin	6.99e-20	TITIN_HUMAN Titin
Q8WZ42	TTN	20232	20320	Immunoglobulin	1.83e-20	TITIN_HUMAN Titin
Q8WZ42	TTN	20629	20719	Immunoglobulin	7.54e-13	TITIN_HUMAN Titin
Q8WZ42	TTN	20920	21009	Immunoglobulin	3.46e-17	TITIN_HUMAN Titin
Q8WZ42	TTN	21314	21404	Immunoglobulin	1.44e-17	TITIN_HUMAN Titin
Q8WZ42	TTN	21711	21800	Immunoglobulin	4.68e-13	TITIN_HUMAN Titin
Q8WZ42	TTN	22001	22092	Immunoglobulin	2.45e-17	TITIN_HUMAN Titin
Q8WZ42	TTN	22396	22488	Immunoglobulin	3.93e-18	TITIN_HUMAN Titin
Q8WZ42	TTN	22797	22884	Immunoglobulin	1.58e-12	TITIN_HUMAN Titin
Q8WZ42	TTN	23075	23174	Immunoglobulin	2.25e-20	TITIN_HUMAN Titin
Q8WZ42	TTN	23478	23570	Immunoglobulin	2.73e-18	TITIN_HUMAN Titin
Q8WZ42	TTN	23879	23966	Immunoglobulin	3.06e-14	TITIN_HUMAN Titin
Q8WZ42	TTN	24161	24256	Immunoglobulin	1.84e-18	TITIN_HUMAN Titin
Q8WZ42	TTN	24560	24652	Immunoglobulin	4.97e-19	TITIN_HUMAN Titin
Q8WZ42	TTN	24959	25049	Immunoglobulin	2.72e-15	TITIN_HUMAN Titin
Q8WZ42	TTN	25239	25338	Immunoglobulin	1.2e-20	TITIN_HUMAN Titin
Q8WZ42	TTN	25643	25735	Immunoglobulin	7.75e-17	TITIN_HUMAN Titin
Q8WZ42	TTN	26044	26131	Immunoglobulin	3e-13	TITIN_HUMAN Titin
Q8WZ42	TTN	26322	26419	Immunoglobulin	1.11e-17	TITIN_HUMAN Titin
Q8WZ42	TTN	26724	26816	Immunoglobulin	7.28e-17	TITIN_HUMAN Titin
Q8WZ42	TTN	27121	27210	Immunoglobulin	4.98e-15	TITIN_HUMAN Titin
Q8WZ42	TTN	27410	27503	Immunoglobulin	5.75e-14	TITIN_HUMAN Titin
Q8WZ42	TTN	27807	27899	Immunoglobulin	4.45e-16	TITIN_HUMAN Titin
Q8WZ42	TTN	28207	28298	Immunoglobulin	2.23e-18	TITIN_HUMAN Titin
Q8WZ42	TTN	28499	28590	Immunoglobulin	7.41e-17	TITIN_HUMAN Titin
Q8WZ42	TTN	28894	28985	Immunoglobulin	4.15e-17	TITIN_HUMAN Titin
Q8WZ42	TTN	29292	29380	Immunoglobulin	3.38e-15	TITIN_HUMAN Titin
Q8WZ42	TTN	29582	29674	Immunoglobulin	3.44e-18	TITIN_HUMAN Titin
Q8WZ42	TTN	29984	30071	Immunoglobulin	3.21e-15	TITIN_HUMAN Titin
Q8WZ42	TTN	30381	30468	Immunoglobulin	1.06e-15	TITIN_HUMAN Titin
Q8WZ42	TTN	30670	30765	Immunoglobulin	6.92e-18	TITIN_HUMAN Titin
Q8WZ42	TTN	31071	31161	Immunoglobulin	8.11e-13	TITIN_HUMAN Titin
Q8WZ42	TTN	31460	31556	Immunoglobulin	4.19e-22	TITIN_HUMAN Titin
Q8WZ42	TTN	31565	31656	Immunoglobulin	1.86e-14	TITIN_HUMAN Titin
Q8WZ42	TTN	31852	31947	Immunoglobulin	6.51e-19	TITIN_HUMAN Titin
Q8WZ42	TTN	31955	32054	Immunoglobulin	1.86e-14	TITIN_HUMAN Titin
Q8WZ42	TTN	32506	32588	Immunoglobulin	4.88e-14	TITIN_HUMAN Titin
Q8WZ42	TTN	32616	32715	Immunoglobulin	1.44e-20	TITIN_HUMAN Titin
Q8WZ42	TTN	32720	32813	Immunoglobulin	6.25e-21	TITIN_HUMAN Titin
Q8WZ42	TTN	33301	33392	Immunoglobulin	1.91e-18	TITIN_HUMAN Titin
Q8WZ42	TTN	33489	33579	Immunoglobulin	2.12e-21	TITIN_HUMAN Titin
Q8WZ42	TTN	33643	33733	Immunoglobulin	4.07e-14	TITIN_HUMAN Titin
Q8WZ42	TTN	33779	33870	Immunoglobulin	2.68e-21	TITIN_HUMAN Titin
Q8WZ42	TTN	33975	34052	Immunoglobulin	1.3e-08	TITIN_HUMAN Titin
Q8WZ42	TTN	34061	34152	Immunoglobulin	6.77e-24	TITIN_HUMAN Titin
Q8WZ42	TTN	34256	34348	Immunoglobulin	5.95e-17	TITIN_HUMAN Titin
Q8WZ42	TTN	14015	14211	Fibronectin type III	9.43e-42	TITIN_HUMAN Titin
Q8WZ42	TTN	14210	14314	Fibronectin type III	3.26e-26	TITIN_HUMAN Titin
Q8WZ42	TTN	14414	14605	Fibronectin type III	5e-44	TITIN_HUMAN Titin
Q8WZ42	TTN	14709	14905	Fibronectin type III	5.08e-45	TITIN_HUMAN Titin
Q8WZ42	TTN	14909	15099	Fibronectin type III	9.38e-44	TITIN_HUMAN Titin
Q8WZ42	TTN	15110	15309	Fibronectin type III	1.96e-40	TITIN_HUMAN Titin
Q8WZ42	TTN	15406	15599	Fibronectin type III	8.55e-43	TITIN_HUMAN Titin
Q8WZ42	TTN	15727	15925	Fibronectin type III	2.06e-43	TITIN_HUMAN Titin
Q8WZ42	TTN	15922	16022	Fibronectin type III	2.8e-21	TITIN_HUMAN Titin
Q8WZ42	TTN	16122	16317	Fibronectin type III	2.02e-38	TITIN_HUMAN Titin
Q8WZ42	TTN	16423	16625	Fibronectin type III	3.6e-41	TITIN_HUMAN Titin
Q8WZ42	TTN	16627	16722	Fibronectin type III	5.93e-24	TITIN_HUMAN Titin
Q8WZ42	TTN	16837	17040	Fibronectin type III	2.25e-44	TITIN_HUMAN Titin
Q8WZ42	TTN	17143	17344	Fibronectin type III	1.09e-44	TITIN_HUMAN Titin
Q8WZ42	TTN	17348	17635	Fibronectin type III	1.35e-39	TITIN_HUMAN Titin
Q8WZ42	TTN	17642	17924	Fibronectin type III	2.06e-37	TITIN_HUMAN Titin
Q8WZ42	TTN	17938	18132	Fibronectin type III	2.2e-46	TITIN_HUMAN Titin
Q8WZ42	TTN	18235	18424	Fibronectin type III	1.42e-42	TITIN_HUMAN Titin
Q8WZ42	TTN	18529	18720	Fibronectin type III	5.06e-42	TITIN_HUMAN Titin
Q8WZ42	TTN	18716	18842	Fibronectin type III	2.06e-21	TITIN_HUMAN Titin
Q8WZ42	TTN	18927	19123	Fibronectin type III	2.97e-36	TITIN_HUMAN Titin
Q8WZ42	TTN	19222	19419	Fibronectin type III	1.42e-44	TITIN_HUMAN Titin
Q8WZ42	TTN	19411	19531	Fibronectin type III	2.38e-22	TITIN_HUMAN Titin
Q8WZ42	TTN	19624	19814	Fibronectin type III	3.77e-43	TITIN_HUMAN Titin
Q8WZ42	TTN	19917	20113	Fibronectin type III	1.04e-41	TITIN_HUMAN Titin
Q8WZ42	TTN	20118	20400	Fibronectin type III	1.03e-35	TITIN_HUMAN Titin
Q8WZ42	TTN	20413	20606	Fibronectin type III	3.06e-45	TITIN_HUMAN Titin
Q8WZ42	TTN	20712	20899	Fibronectin type III	3.52e-41	TITIN_HUMAN Titin
Q8WZ42	TTN	21002	21197	Fibronectin type III	3.69e-43	TITIN_HUMAN Titin
Q8WZ42	TTN	21202	21486	Fibronectin type III	4.3e-39	TITIN_HUMAN Titin
Q8WZ42	TTN	21497	21686	Fibronectin type III	7.43e-45	TITIN_HUMAN Titin
Q8WZ42	TTN	21793	21983	Fibronectin type III	6.53e-44	TITIN_HUMAN Titin
Q8WZ42	TTN	22084	22279	Fibronectin type III	6.49e-42	TITIN_HUMAN Titin
Q8WZ42	TTN	22278	22386	Fibronectin type III	2.38e-23	TITIN_HUMAN Titin
Q8WZ42	TTN	22480	22675	Fibronectin type III	5.26e-44	TITIN_HUMAN Titin
Q8WZ42	TTN	22681	22769	Fibronectin type III	9.89e-23	TITIN_HUMAN Titin
Q8WZ42	TTN	22877	23069	Fibronectin type III	8.55e-45	TITIN_HUMAN Titin
Q8WZ42	TTN	23166	23364	Fibronectin type III	1.74e-41	TITIN_HUMAN Titin
Q8WZ42	TTN	23360	23469	Fibronectin type III	6.28e-26	TITIN_HUMAN Titin
Q8WZ42	TTN	23562	23758	Fibronectin type III	1.57e-42	TITIN_HUMAN Titin
Q8WZ42	TTN	23760	23869	Fibronectin type III	3.3e-22	TITIN_HUMAN Titin
Q8WZ42	TTN	23959	24150	Fibronectin type III	1.41e-42	TITIN_HUMAN Titin
Q8WZ42	TTN	24248	24446	Fibronectin type III	1.8e-43	TITIN_HUMAN Titin
Q8WZ42	TTN	24431	24550	Fibronectin type III	4.55e-24	TITIN_HUMAN Titin
Q8WZ42	TTN	24644	24840	Fibronectin type III	2.05e-42	TITIN_HUMAN Titin
Q8WZ42	TTN	24843	24939	Fibronectin type III	3.14e-22	TITIN_HUMAN Titin
Q8WZ42	TTN	25041	25223	Fibronectin type III	5.29e-41	TITIN_HUMAN Titin
Q8WZ42	TTN	25331	25528	Fibronectin type III	1.74e-42	TITIN_HUMAN Titin
Q8WZ42	TTN	25529	25817	Fibronectin type III	1.8e-38	TITIN_HUMAN Titin
Q8WZ42	TTN	25828	26017	Fibronectin type III	3.38e-44	TITIN_HUMAN Titin
Q8WZ42	TTN	26124	26309	Fibronectin type III	4.43e-44	TITIN_HUMAN Titin
Q8WZ42	TTN	26413	26607	Fibronectin type III	1.03e-42	TITIN_HUMAN Titin
Q8WZ42	TTN	26611	26901	Fibronectin type III	1.96e-33	TITIN_HUMAN Titin
Q8WZ42	TTN	26908	27104	Fibronectin type III	3.28e-44	TITIN_HUMAN Titin
Q8WZ42	TTN	27203	27390	Fibronectin type III	6.61e-43	TITIN_HUMAN Titin
Q8WZ42	TTN	27495	27690	Fibronectin type III	4.06e-39	TITIN_HUMAN Titin
Q8WZ42	TTN	27685	27797	Fibronectin type III	7.53e-28	TITIN_HUMAN Titin
Q8WZ42	TTN	27891	28089	Fibronectin type III	4.5e-41	TITIN_HUMAN Titin
Q8WZ42	TTN	28092	28390	Fibronectin type III	1.33e-40	TITIN_HUMAN Titin
Q8WZ42	TTN	28388	28669	Fibronectin type III	1.41e-33	TITIN_HUMAN Titin
Q8WZ42	TTN	28683	28874	Fibronectin type III	1.95e-41	TITIN_HUMAN Titin
Q8WZ42	TTN	28979	29171	Fibronectin type III	7.23e-41	TITIN_HUMAN Titin
Q8WZ42	TTN	29168	29271	Fibronectin type III	6e-24	TITIN_HUMAN Titin
Q8WZ42	TTN	29374	29564	Fibronectin type III	5.6e-42	TITIN_HUMAN Titin
Q8WZ42	TTN	29667	29863	Fibronectin type III	3.43e-40	TITIN_HUMAN Titin
Q8WZ42	TTN	29867	30154	Fibronectin type III	6.53e-36	TITIN_HUMAN Titin
Q8WZ42	TTN	30166	30359	Fibronectin type III	1.09e-41	TITIN_HUMAN Titin
Q8WZ42	TTN	30463	30658	Fibronectin type III	1.57e-40	TITIN_HUMAN Titin
Q8WZ42	TTN	30743	30850	Fibronectin type III	1.02e-22	TITIN_HUMAN Titin
Q8WZ42	TTN	30858	31048	Fibronectin type III	5.81e-44	TITIN_HUMAN Titin
Q8WZ42	TTN	31140	31262	Fibronectin type III	9.11e-24	TITIN_HUMAN Titin
Q8WZ42	TTN	31254	31444	Fibronectin type III	1.79e-45	TITIN_HUMAN Titin
Q8WZ42	TTN	31648	31847	Fibronectin type III	1.02e-40	TITIN_HUMAN Titin
Q8WZ42	TTN	32037	32144	Fibronectin type III	1.98e-26	TITIN_HUMAN Titin
Q92597	NDRG1	30	310	alpha/beta-Hydrolases	4.38e-28	NDRG1_HUMAN Protein NDRG1
Q92854	SEMA4D	26	500	Sema domain	3.66e-171	SEM4D_HUMAN Semaphorin-4D
Q92854	SEMA4D	502	552	Plexin repeat	1.14e-12	SEM4D_HUMAN Semaphorin-4D
Q92854	SEMA4D	563	650	Immunoglobulin	4.52e-10	SEM4D_HUMAN Semaphorin-4D
Q92930	RAB8B	4	178	P-loop containing nucleoside triphosphate hydrolases	1.26e-63	RAB8B_HUMAN Ras-related protein Rab-8B
Q96DA2	RAB39B	7	196	P-loop containing nucleoside triphosphate hydrolases	1.32e-56	RB39B_HUMAN Ras-related protein Rab-39B
Q96FE7	PIK3IP1	3	112	Kringle-like	4.11e-22	P3IP1_HUMAN Phosphoinositide-3-kinase-interacting protein 1
Q96QK1	VPS35	215	776	ARM repeat	5.23e-08	VPS35_HUMAN Vacuolar protein sorting-associated protein 35
Q96SL1	DIRC2	46	464	MFS general substrate transporter	1.57e-32	DIRC2_HUMAN Disrupted in renal carcinoma protein 2
Q99426	TBCB	9	92	Ubiquitin-like	5.04e-26	TBCB_HUMAN Tubulin-folding cofactor B
Q99426	TBCB	96	233	Cap-Gly domain	6.28e-40	TBCB_HUMAN Tubulin-folding cofactor B
Q99536	VAT1	161	352	NAD(P)-binding Rossmann-fold domains	6.43e-39	VAT1_HUMAN Synaptic vesicle membrane protein VAT-1 homolog
Q99536	VAT1	49	189	GroES-like	6.24e-37	VAT1_HUMAN Synaptic vesicle membrane protein VAT-1 homolog
Q99584	S100A13	3	92	EF-hand	8.94e-19	S10AD_HUMAN Protein S100-A13
Q99623	PHB2	72	207	Band 7/SPFH domain	1.05e-15	PHB2_HUMAN Prohibitin-2
Q99653	CHP1	23	179	EF-hand	2.78e-48	CHP1_HUMAN Calcineurin B homologous protein 1
Q99653	CHP1	66	178	CATH	2.58e-15	CHP1_HUMAN Calcineurin B homologous protein 1
Q99988	GDF15	201	307	Cystine-knot cytokines	2.41e-27	GDF15_HUMAN Growth/differentiation factor 15
Q9BV40	VAMP8	8	73	SNARE fusion complex	4.24e-21	VAMP8_HUMAN Vesicle-associated membrane protein 8
Q9GZU7	CTDSP1	77	255	HAD-like	1.24e-59	CTDS1_HUMAN Carboxy-terminal domain RNA polymerase II polypeptide A small phosphatase 1
Q9H0U4	RAB1B	4	175	P-loop containing nucleoside triphosphate hydrolases	4.74e-66	RAB1B_HUMAN Ras-related protein Rab-1B
Q9H3M7	TXNIP	3	161	E set domains	2.52e-18	TXNIP_HUMAN Thioredoxin-interacting protein
Q9H3M7	TXNIP	159	336	E set domains	4.55e-14	TXNIP_HUMAN Thioredoxin-interacting protein
Q9H3U5	MFSD1	32	440	MFS general substrate transporter	5.89e-55	MFSD1_HUMAN Major facilitator superfamily domain-containing protein 1
Q9H4G4	GLIPR2	6	142	PR-1-like	4.17e-60	GAPR1_HUMAN Golgi-associated plant pathogenesis-related protein 1
Q9H8M5	CNNM2	433	577	CBS-domain pair	4.64e-16	CNNM2_HUMAN Metal transporter CNNM2
Q9HB71	CACYBP	76	200	HSP20-like chaperones	7.33e-22	CYBP_HUMAN Calcyclin-binding protein
Q9HB71	CACYBP	3	52	Calcyclin-binding protein-like	1.07e-16	CYBP_HUMAN Calcyclin-binding protein
Q9NQ11	ATP13A2	517	730	Metal cation-transporting ATPase, ATP-binding domain N	3.05e-18	AT132_HUMAN Probable cation-transporting ATPase 13A2
Q9NQ11	ATP13A2	507	926	HAD-like	2.17e-31	AT132_HUMAN Probable cation-transporting ATPase 13A2
Q9NQ11	ATP13A2	194	1137	Calcium ATPase, transmembrane domain M	2.09e-64	AT132_HUMAN Probable cation-transporting ATPase 13A2
Q9NQ11	ATP13A2	296	409	Calcium ATPase, transduction domain A	2.35e-19	AT132_HUMAN Probable cation-transporting ATPase 13A2
Q9NSD9	FARSB	5	85	Putative DNA-binding domain	3.24e-08	SYFB_HUMAN Phenylalanine--tRNA ligase beta subunit
Q9NSD9	FARSB	305	378	Putative DNA-binding domain	1.37e-15	SYFB_HUMAN Phenylalanine--tRNA ligase beta subunit
Q9NSD9	FARSB	219	281	PheT/TilS domain	2.59e-07	SYFB_HUMAN Phenylalanine--tRNA ligase beta subunit
Q9NSD9	FARSB	371	587	Class II aaRS and biotin synthetases	1.29e-45	SYFB_HUMAN Phenylalanine--tRNA ligase beta subunit
Q9NUP9	LIN7C	87	182	PDZ domain-like	4.86e-30	LIN7C_HUMAN Protein lin-7 homolog C
Q9NUP9	LIN7C	9	63	L27 domain	4.71e-26	LIN7C_HUMAN Protein lin-7 homolog C
Q9NVJ2	ARL8B	17	183	P-loop containing nucleoside triphosphate hydrolases	7.44e-47	ARL8B_HUMAN ADP-ribosylation factor-like protein 8B
Q9NZM1	MYOF	2	114	C2 domain (Calcium/lipid-binding domain, CaLB)	6.69e-21	MYOF_HUMAN Myoferlin
Q9NZM1	MYOF	192	319	C2 domain (Calcium/lipid-binding domain, CaLB)	4.98e-19	MYOF_HUMAN Myoferlin
Q9NZM1	MYOF	341	468	C2 domain (Calcium/lipid-binding domain, CaLB)	6.55e-21	MYOF_HUMAN Myoferlin
Q9NZM1	MYOF	1137	1268	C2 domain (Calcium/lipid-binding domain, CaLB)	2.05e-22	MYOF_HUMAN Myoferlin
Q9NZM1	MYOF	1301	1405	C2 domain (Calcium/lipid-binding domain, CaLB)	2.96e-11	MYOF_HUMAN Myoferlin
Q9NZM1	MYOF	1535	1647	C2 domain (Calcium/lipid-binding domain, CaLB)	4.32e-24	MYOF_HUMAN Myoferlin
Q9NZM1	MYOF	1757	1921	C2 domain (Calcium/lipid-binding domain, CaLB)	1.71e-17	MYOF_HUMAN Myoferlin
Q9P296	C5AR2	1	314	Family A G protein-coupled receptor-like	2.01e-45	C5AR2_HUMAN C5a anaphylatoxin chemotactic receptor 2
Q9UBI6	GNG12	4	67	Transducin (heterotrimeric G protein), gamma chain	1.31e-22	GBG12_HUMAN Guanine nucleotide-binding protein G(I)/G(S)/G(O) subunit gamma-12
Q9UBS9	SUCO	346	425	Galactose-binding domain-like	1.65e-05	SUCO_HUMAN SUN domain-containing ossification factor
Q9UEU0	VTI1B	12	98	t-snare proteins	6.36e-21	VTI1B_HUMAN Vesicle transport through interaction with t-SNAREs homolog 1B
Q9UEU0	VTI1B	139	198	SNARE fusion complex	1.44e-15	VTI1B_HUMAN Vesicle transport through interaction with t-SNAREs homolog 1B
Q9UL25	RAB21	18	182	P-loop containing nucleoside triphosphate hydrolases	1.75e-55	RAB21_HUMAN Ras-related protein Rab-21
Q9UL26	RAB22A	5	171	P-loop containing nucleoside triphosphate hydrolases	5.21e-57	RB22A_HUMAN Ras-related protein Rab-22A
Q9UPI3	FLVCR2	72	498	MFS general substrate transporter	1.7e-57	FLVC2_HUMAN Feline leukemia virus subgroup C receptor-related protein 2
Q9Y3D6	FIS1	1	149	TPR-like	2.85e-48	FIS1_HUMAN Mitochondrial fission 1 protein
Q9Y3L5	RAP2C	2	167	P-loop containing nucleoside triphosphate hydrolases	4.83e-52	RAP2C_HUMAN Ras-related protein Rap-2c
Q9Y5G0	PCDHGB5	32	125	Cadherin-like	2.57e-09	PCDGH_HUMAN Protocadherin gamma-B5
Q9Y5G0	PCDHGB5	127	234	Cadherin-like	5.32e-23	PCDGH_HUMAN Protocadherin gamma-B5
Q9Y5G0	PCDHGB5	236	335	Cadherin-like	1.03e-28	PCDGH_HUMAN Protocadherin gamma-B5
Q9Y5G0	PCDHGB5	337	440	Cadherin-like	3.8e-24	PCDGH_HUMAN Protocadherin gamma-B5
Q9Y5G0	PCDHGB5	437	559	Cadherin-like	6.28e-28	PCDGH_HUMAN Protocadherin gamma-B5
Q9Y5G0	PCDHGB5	552	660	Cadherin-like	1.38e-16	PCDGH_HUMAN Protocadherin gamma-B5
