# Supplementary material for: Unraveling the surface glycoprotein interaction network by integrating chemical crosslinking with MS-based proteomics
Source: Royal Society of Chemistry journal article supplement (doi:10.1039/d0sc06327d), 2021-01-01
Supplement: d0sc06327d5.xlsx [file d0sc06327d5.xlsx]

## Sheet: Protein-protein interactions
Table S4. Protein-protein interactions extracted from IntAct
Interactor A	Interactor B	IntAct ID	Detection Method
A2M	APP	EBI-3385446	two hybrid array
AAK1	ATP13A2	EBI-6377254	ubiquitin reconstruction
AASDHPPT	HLA-B	EBI-1080073	anti bait coimmunoprecipitation
ABCA1	STX12	EBI-9351698	fluorescence microscopy
ABCA1	FLOT1	EBI-9351898	anti bait coimmunoprecipitation
ABCB1	PHB2	EBI-1081494	anti bait coimmunoprecipitation
ABCC4	SCRIB	EBI-11792098	phage display
ABHD17A	GPC4	EBI-8655233	two hybrid
ABHD4	IGFBP5	EBI-19000951	two hybrid prey pooling approach
ABHD5	TPD52L2	EBI-20156085	two hybrid array
ABHD6	FIS1	EBI-18862268	two hybrid array
ABI1	CYFIP1	EBI-7160735	anti bait coimmunoprecipitation
ABI2	VASP	EBI-10525420	validated two hybrid
ABI3	VASP	EBI-10368864	two hybrid array
ABL1	TGOLN2	EBI-1957415	peptide array
ABL1	APP	EBI-7810061	pull down
ABLIM1	TTN	EBI-5665582	two hybrid fragment pooling approach
ABTB1	EEF1A2	EBI-10223683	two hybrid prey pooling approach
ACAD11	CNTN5	EBI-21892954	anti tag coimmunoprecipitation
ACAD11	CD2BP2	EBI-20054958	two hybrid array
ACADVL	GPHN	EBI-3943975	two hybrid
ACAT1	HLA-C	EBI-1062931	anti bait coimmunoprecipitation
ACAT1	HLA-B	EBI-1078577	anti bait coimmunoprecipitation
ACAT2	HLA-B	EBI-1076088	anti bait coimmunoprecipitation
ACBD3	TGOLN2	EBI-7588829	fluorescence microscopy
ACKR3	ATP13A2	EBI-6377302	ubiquitin reconstruction
ACSL5	SLC16A7	EBI-19608189	two hybrid array
ACTA1	GC	EBI-8450588	x-ray crystallography
ACTB	ATP13A2	EBI-6377433	ubiquitin reconstruction
ACTB	FLOT2	EBI-9841078	confocal microscopy
ACTC1	PLEC	EBI-20924642	cross-linking study
ACTC1	GAPDH	EBI-7157149	two hybrid
ACTG1	VASP	EBI-6590193	proximity ligation assay
ACTG1	IQGAP1	EBI-8631681	cross-linking study
ACTN1	CTNNA1	EBI-6590215	proximity ligation assay
ACTN1	TTN	EBI-6397798	pull down
ACTN1	SCRIB	EBI-11794656	phage display
ACTN2	TTN	EBI-8606711	two hybrid
ACTN2	SCRIB	EBI-11794666	phage display
ACTN3	SCRIB	EBI-11794676	phage display
ACTN4	IQGAP1	EBI-6897912	anti bait coimmunoprecipitation
ACTN4	TTN	EBI-5665670	two hybrid fragment pooling approach
ACTN4	SCRIB	EBI-11794686	phage display
ACTR1A	HLA-B	EBI-1075557	anti bait coimmunoprecipitation
ACTR2	HLA-B	EBI-1085706	anti bait coimmunoprecipitation
ADAM10	CD9	EBI-20978694	anti bait coimmunoprecipitation
ADAM10	CD81	EBI-21222803	anti bait coimmunoprecipitation
ADAM10	PHB	EBI-2682123	display technology
ADAM19	LYN	EBI-21226800	phage display
ADAM22	SCRIB	EBI-11792079	phage display
ADAM9	PACSIN3	EBI-78013	pull down
ADAM9	MAD2L2	EBI-78229	pull down
ADAMTS12	COMP	EBI-9028243	protease assay
ADAMTSL2	FBLN1	EBI-3929537	two hybrid
ADAMTSL4	FBLN1	EBI-3937687	two hybrid
ADCK1	RAB1A	EBI-735533	two hybrid pooling approach
ADCY2	GNAS	EBI-6589812	proximity ligation assay
ADORA1	ADRB1	EBI-21335277	anti bait coimmunoprecipitation
ADORA1	ADRB2	EBI-21335282	anti bait coimmunoprecipitation
ADORA2A	ADORA1	EBI-2904959	confocal microscopy
ADRA1A	ATP6AP2	EBI-20801320	ubiquitin reconstruction
ADRA1A	CD81	EBI-20801330	ubiquitin reconstruction
ADRA1D	SCRIB	EBI-11791989	phage display
ADRB2	SPTBN2	EBI-20801939	ubiquitin reconstruction
ADRB2	RAB14	EBI-20801909	ubiquitin reconstruction
ADRB2	ATP6V0D1	EBI-20801561	ubiquitin reconstruction
ADRB2	SLC9A3R1	EBI-8677381	saturation binding
ADSS2	HLA-B	EBI-1083939	anti bait coimmunoprecipitation
AFDN	CTNNA1	EBI-8758280	confocal microscopy
AFP	HLA-B	EBI-1085306	anti bait coimmunoprecipitation
AGER	RHOA	EBI-7639034	anti bait coimmunoprecipitation
AGO2	FKBP4	EBI-9028635	anti bait coimmunoprecipitation
AGO2	DDX6	EBI-15585723	anti tag coimmunoprecipitation
AGR2	IMPDH2	EBI-18819376	two hybrid array
AGTR1	SLC16A1	EBI-20802893	ubiquitin reconstruction
AGTR1	BASP1	EBI-20802457	ubiquitin reconstruction
AGTRAP	CAPNS1	EBI-10573138	validated two hybrid
AHCY	HLA-B	EBI-1084004	anti bait coimmunoprecipitation
AHI1	SPATA7	EBI-21018892	bimolecular fluorescence complementation
AHSA1	HLA-B	EBI-1077112	anti bait coimmunoprecipitation
AHSP	HBA1	EBI-16247652	bio-layer interferometry
AIFM1	HLA-B	EBI-1077732	anti bait coimmunoprecipitation
AIMP1	HLA-B	EBI-1077078	anti bait coimmunoprecipitation
AIPL1	SEC16A	EBI-11934760	inference by socio-affinity scoring
AK6	FBLN1	EBI-3908850	two hybrid array
AKAP1	SCRIB	EBI-20731180	p8 filamentous phage display
AKAP11	PHB	EBI-2686154	display technology
AKAP13	RANBP2	EBI-3449822	two hybrid pooling approach
AKR1B1	HLA-B	EBI-1084227	anti bait coimmunoprecipitation
AKR7A2	HLA-B	EBI-1084330	anti bait coimmunoprecipitation
AKT1	CTNNA1	EBI-8996781	two hybrid array
ALCAM	LGALS1	EBI-9539528	pull down
ALDH7A1	ATP1A1	EBI-20919140	cross-linking study
ALDH9A1	HLA-B	EBI-1081192	anti bait coimmunoprecipitation
ALDOB	NRAS	EBI-8999668	two hybrid array
ALDOB	CTNNA1	EBI-8996794	two hybrid array
ALOX15	PEBP1	EBI-15939860	anti bait coimmunoprecipitation
ANK2	PICALM	EBI-21378548	two hybrid fragment pooling approach
ANK3	PICALM	EBI-21378626	two hybrid fragment pooling approach
ANKRD1	TTN	EBI-5653515	two hybrid fragment pooling approach
ANKRD46	APH1A	EBI-19291339	two hybrid prey pooling approach
ANKS1B	RHOA	EBI-19015942	two hybrid prey pooling approach
ANKS1B	APP	EBI-21384435	two hybrid fragment pooling approach
ANXA2	HLA-B	EBI-1079801	anti bait coimmunoprecipitation
ANXA2	HMGN3	EBI-20916552	cross-linking study
ANXA2	C16orf87	EBI-20899772	cross-linking study
ANXA2	CHRM2	EBI-20937228	cross-linking study
ANXA2	PTK2	EBI-20913238	cross-linking study
ANXA2	AHNAK	EBI-20932304	cross-linking study
ANXA2	SYTL2	EBI-20902008	cross-linking study
ANXA2	STC2	EBI-20905096	cross-linking study
ANXA2	CAVIN2	EBI-20906072	cross-linking study
ANXA2	TTLL7	EBI-20907880	cross-linking study
ANXA2	PALMD	EBI-20921428	cross-linking study
ANXA2	TRAF6	EBI-1076020	anti bait coimmunoprecipitation
ANXA2	BCAR3	EBI-1076716	anti bait coimmunoprecipitation
ANXA2	GH1	EBI-1077780	anti bait coimmunoprecipitation
ANXA2	IKBKE	EBI-1081538	anti bait coimmunoprecipitation
ANXA2	CCR10	EBI-12739394	proximity ligation assay
ANXA2	ANG	EBI-12513171	fluorescence microscopy
ANXA2	S100A10	EBI-12513176	fluorescence microscopy
ANXA2	PAK2	EBI-1067788	anti bait coimmunoprecipitation
ANXA2	GABARAPL2	EBI-1068142	anti bait coimmunoprecipitation
ANXA2	EIF6	EBI-1068927	anti bait coimmunoprecipitation
ANXA2	FTSJ1	EBI-1072715	anti bait coimmunoprecipitation
ANXA2	ARF6	EBI-1066194	anti bait coimmunoprecipitation
ANXA2	TNIK	EBI-1067365	anti bait coimmunoprecipitation
ANXA2	PPM1B	EBI-1062151	anti bait coimmunoprecipitation
ANXA2	VHL	EBI-1060408	anti bait coimmunoprecipitation
ANXA2	EIF1B	EBI-1071729	anti bait coimmunoprecipitation
ANXA2	MCC	EBI-1064699	anti bait coimmunoprecipitation
ANXA3	EMG1	EBI-736385	two hybrid pooling approach
ANXA4	NMT2	EBI-7095733	two hybrid
ANXA5	EIF4G1	EBI-736667	two hybrid pooling approach
ANXA5	SUPT4H1	EBI-737738	two hybrid pooling approach
ANXA5	NANS	EBI-11905334	inference by socio-affinity scoring
ANXA5	PPA1	EBI-11905325	inference by socio-affinity scoring
ANXA5	UBE2N	EBI-11905316	inference by socio-affinity scoring
ANXA5	MRPL12	EBI-11905307	inference by socio-affinity scoring
ANXA5	IDH2	EBI-11905298	inference by socio-affinity scoring
ANXA5	SNRPB2	EBI-11905289	inference by socio-affinity scoring
ANXA5	DNAJC8	EBI-11905280	inference by socio-affinity scoring
ANXA5	CS	EBI-11905271	inference by socio-affinity scoring
ANXA5	ZNF207	EBI-11905262	inference by socio-affinity scoring
ANXA5	GSC2	EBI-20140321	two hybrid array
ANXA5	TERF1	EBI-11309388	bimolecular fluorescence complementation
ANXA5	TINF2	EBI-11309418	bimolecular fluorescence complementation
ANXA6	MAPT	EBI-20899339	anti tag coimmunoprecipitation
ANXA6	LRRC45	EBI-20902272	cross-linking study
ANXA6	CPNE6	EBI-20935780	cross-linking study
ANXA6	CHST11	EBI-20936148	cross-linking study
ANXA6	MTNR1B	EBI-11577569	two hybrid
ANXA7	CLEC3B	EBI-7096817	two hybrid
AOPEP	NRAS	EBI-8999694	two hybrid array
AP1M2	APP	EBI-3385574	two hybrid array
AP1S1	SLC16A1	EBI-1071988	anti bait coimmunoprecipitation
AP3D1	CACYBP	EBI-9358567	luminescence based mammalian interactome mapping
APBA1	APP	EBI-371441	anti bait coimmunoprecipitation
APBB1	CLSTN1	EBI-7298547	anti tag coimmunoprecipitation
APBB1	APP	EBI-286468	two hybrid
APBB2	APP	EBI-21379220	two hybrid fragment pooling approach
APBB3	APP	EBI-21369750	two hybrid fragment pooling approach
APC	SPTBN2	EBI-3437587	two hybrid pooling approach
APC	CTNNA1	EBI-6593495	proximity ligation assay
APC	SCRIB	EBI-8306628	fluorescence technology
APEH	LGALS8	EBI-10513786	validated two hybrid
APEH	HLA-B	EBI-1086264	anti bait coimmunoprecipitation
APEX1	HLA-B	EBI-1077691	anti bait coimmunoprecipitation
APH1A	DRD2	EBI-20805380	ubiquitin reconstruction
APH1A	CREB3	EBI-8638557	two hybrid
APH1A	MRAP2	EBI-19292544	two hybrid prey pooling approach
APH1A	HIVEP1	EBI-3939188	two hybrid
APH1A	HES1	EBI-3939248	two hybrid
APH1A	TLE1	EBI-3939983	two hybrid
APH1A	BHLHE40	EBI-3940003	two hybrid
APH1A	ATF4	EBI-3911742	two hybrid array
APIP	TNPO2	EBI-10501224	validated two hybrid
APIP	IMPDH2	EBI-10286699	two hybrid prey pooling approach
APOA1	FBLN1	EBI-3926569	two hybrid
APOA1	APP	EBI-711042	enzyme linked immunosorbent assay
APOD	APH1A	EBI-19290752	two hybrid prey pooling approach
APOD	CLDN7	EBI-19347708	two hybrid prey pooling approach
APOE	APP	EBI-11291061	anti tag coimmunoprecipitation
APOH	PLG	EBI-9548365	enzyme linked immunosorbent assay
APOH	SAV1	EBI-16425169	two hybrid
APOH	LDLR	EBI-15842278	fluorescence polarization spectroscopy
APOH	GEM	EBI-2114744	two hybrid
APOH	AKT1	EBI-2116287	two hybrid
APP	ITM2B	EBI-21012029	anti bait coimmunoprecipitation
APP	MT-CO1	EBI-21398980	enzyme linked immunosorbent assay
APP	APBA2	EBI-20797421	fluorescence polarization spectroscopy
APP	SORL1	EBI-20796904	confocal microscopy
APP	ADAM10	EBI-21478390	fluorescent resonance energy transfer
APP	LRPPRC	EBI-21136077	proximity ligation assay
APP	SORT1	EBI-21193768	anti bait coimmunoprecipitation
APP	PCNT	EBI-20936948	cross-linking study
APP	CDC37	EBI-3385594	two hybrid array
APP	MAST1	EBI-3385931	two hybrid array
APP	TP53BP2	EBI-77677	enzyme linked immunosorbent assay
APP	SHC3	EBI-79099	pull down
APP	CHRNA7	EBI-79351	imaging technique
APP	GRB2	EBI-8577657	anti bait coimmunoprecipitation
APP	CASP3	EBI-6589703	proximity ligation assay
APP	MAP3K5	EBI-6595677	proximity ligation assay
APP	TGFB2	EBI-6595856	proximity ligation assay
APP	TAF9	EBI-2691642	display technology
APP	DLG4	EBI-8038728	anti bait coimmunoprecipitation
APP	GTF2F2	EBI-2683908	display technology
APP	PCBD1	EBI-2685777	display technology
APP	GSAP	EBI-15875336	anti bait coimmunoprecipitation
APP	PSEN2	EBI-2010290	anti bait coimmunoprecipitation
APP	NF1	EBI-2432247	two hybrid
APP	CAT	EBI-2432203	enzyme linked immunosorbent assay
APP	ADAM17	EBI-2432281	protease assay
APP	KLK6	EBI-2432334	protease assay
APP	PRNP	EBI-979744	surface plasmon resonance
APP	TIRAP	EBI-3916076	two hybrid array
APPBP2	CSNK1G2	EBI-10377814	two hybrid array
APPBP2	SLC9A3R1	EBI-19020083	two hybrid prey pooling approach
APPL1	RAB22A	EBI-7463780	pull down
APPL1	RAB21	EBI-7464488	pull down
APPL2	RAB22A	EBI-10476153	two hybrid array
AR	FKBP4	EBI-15934483	anti bait coimmunoprecipitation
AR	LYN	EBI-9455829	fluorescence polarization spectroscopy
ARAP1	TNFRSF10A	EBI-1581318	confocal microscopy
ARAP1	TNFRSF10B	EBI-1581300	anti bait coimmunoprecipitation
AREG	CCND3	EBI-6595823	proximity ligation assay
AREG	S100A2	EBI-7211717	far western blotting
AREG	S100A4	EBI-7211802	pull down
AREG	KRTAP10-8	EBI-19593167	two hybrid array
AREG	CYSRT1	EBI-19256410	two hybrid prey pooling approach
ARF3	ATN1	EBI-951076	two hybrid
ARF4	RAB11FIP3	EBI-16169662	pull down
ARF4	RCHY1	EBI-3929870	two hybrid
ARF5	RAB11FIP4	EBI-15605267	pull down
ARF5	RAB11FIP3	EBI-15605449	pull down
ARF5	ACY3	EBI-20016397	two hybrid array
ARF6	MYADM	EBI-21876581	anti tag coimmunoprecipitation
ARF6	RAB8A	EBI-8783687	confocal microscopy
ARF6	CACYBP	EBI-1074486	anti bait coimmunoprecipitation
ARF6	HLA-B	EBI-1075416	anti bait coimmunoprecipitation
ARFIP1	SMIM5	EBI-19637489	two hybrid array
ARFIP2	ARF3	EBI-640718	two hybrid
ARG1	FLOT1	EBI-7105968	pull down
ARHGAP1	RHOC	EBI-755929	two hybrid pooling approach
ARHGAP1	RHOA	EBI-1033210	x-ray crystallography
ARHGAP45	RHOA	EBI-9867722	confocal microscopy
ARHGDIA	RDX	EBI-8678666	pull down
ARHGDIA	EZR	EBI-6095981	fluorescence microscopy
ARHGDIA	RHOA	EBI-10369537	two hybrid array
ARHGEF11	RHOA	EBI-3927030	two hybrid
ARHGEF16	SCRIB	EBI-20731110	p8 filamentous phage display
ARHGEF19	RHOA	EBI-7800015	pull down
ARHGEF4	HLA-B	EBI-3438021	two hybrid pooling approach
ARHGEF7	SCRIB	EBI-7074993	pull down
ARID4B	RANBP2	EBI-3449836	two hybrid pooling approach
ARIH1	CUL1	EBI-9118068	anti tag coimmunoprecipitation
ARL1	HLA-B	EBI-1077764	anti bait coimmunoprecipitation
ARL13B	CLDN4	EBI-19374050	two hybrid prey pooling approach
ARL8B	ATP5MF	EBI-733977	two hybrid pooling approach
ARL8B	DLEU1	EBI-736622	two hybrid pooling approach
ARL8B	HCCS	EBI-11934212	inference by socio-affinity scoring
ARL8B	GBA	EBI-11934203	inference by socio-affinity scoring
ARL8B	CIDEB	EBI-19219605	two hybrid prey pooling approach
ARL8B	AMH	EBI-3909416	two hybrid array
ARL8B	BTN3A3	EBI-3922163	two hybrid array
ARMC8	RAB8A	EBI-11921252	inference by socio-affinity scoring
ARMS2	FBLN1	EBI-21988077	two hybrid
ARPC2	HLA-B	EBI-1085762	anti bait coimmunoprecipitation
ARPC3	VASP	EBI-11900295	inference by socio-affinity scoring
ARRB1	GNAQ	EBI-8309129	cross-linking study
ARSA	PPIC	EBI-3905706	two hybrid array
ASGR1	APH1A	EBI-19292253	two hybrid prey pooling approach
ASGR2	ATP6V0C	EBI-18975542	two hybrid prey pooling approach
ASGR2	VTI1B	EBI-18975438	two hybrid prey pooling approach
ASH1L	APP	EBI-21384067	two hybrid fragment pooling approach
ASH2L	TTN	EBI-5654552	two hybrid fragment pooling approach
ASL	HMOX1	EBI-3905409	two hybrid array
ASNSD1	SCRIB	EBI-20731033	p8 filamentous phage display
ASPH	SDC2	EBI-19131479	two hybrid prey pooling approach
ATAD2B	SCRIB	EBI-11791980	phage display
ATF7IP	SPTBN1	EBI-7243805	two hybrid
ATG9A	TGOLN2	EBI-8547539	fluorescence microscopy
ATG9A	VPS35	EBI-10104110	fluorescence microscopy
ATM	BRAT1	EBI-10826354	confocal microscopy
ATP13A2	SEC61B	EBI-6377222	ubiquitin reconstruction
ATP13A2	WDR83OS	EBI-6377615	ubiquitin reconstruction
ATP13A2	DCAF7	EBI-6377535	ubiquitin reconstruction
ATP13A2	HIPK1	EBI-6377479	ubiquitin reconstruction
ATP13A2	LRP6	EBI-6377417	ubiquitin reconstruction
ATP13A2	ICAM2	EBI-6377320	ubiquitin reconstruction
ATP13A2	GPR21	EBI-6377575	ubiquitin reconstruction
ATP13A2	OCA2	EBI-6377543	ubiquitin reconstruction
ATP13A2	VAMP2	EBI-6377246	ubiquitin reconstruction
ATP13A2	NPY1R	EBI-6377401	ubiquitin reconstruction
ATP13A2	LMAN2	EBI-6377200	ubiquitin reconstruction
ATP13A2	EMC7	EBI-6377607	ubiquitin reconstruction
ATP13A2	SPCS2	EBI-6377183	ubiquitin reconstruction
ATP13A2	FAM8A1	EBI-6377591	ubiquitin reconstruction
ATP13A2	FAM111B	EBI-6377583	ubiquitin reconstruction
ATP13A2	UBE2J2	EBI-6377230	ubiquitin reconstruction
ATP13A2	CXCR4	EBI-6377294	ubiquitin reconstruction
ATP13A2	COL1A1	EBI-6377567	ubiquitin reconstruction
ATP13A2	WDR5B	EBI-6377523	ubiquitin reconstruction
ATP13A2	CYGB	EBI-6377559	ubiquitin reconstruction
ATP1A1	NDRG1	EBI-1190904	anti bait coimmunoprecipitation
ATP1A1	NCKAP5L	EBI-20907168	cross-linking study
ATP1A1	B4GALT2	EBI-20907976	cross-linking study
ATP1A1	EZH2	EBI-734454	two hybrid pooling approach
ATP1A1	TNFRSF1A	EBI-364342	tandem affinity purification
ATP1A1	TNFRSF1B	EBI-364561	tandem affinity purification
ATP1A1	SNX6	EBI-8535834	anti bait coimmunoprecipitation
ATP1A3	MS4A6A	EBI-21380874	two hybrid fragment pooling approach
ATP1A3	ATXN1	EBI-951382	two hybrid
ATP1A3	CASP8	EBI-9064039	two hybrid array
ATP1A3	PCBD1	EBI-2690306	display technology
ATP1B1	ATP1A1	EBI-20908640	cross-linking study
ATP2B1	SCRIB	EBI-20731140	p8 filamentous phage display
ATP2B1	ADAM12	EBI-20936964	cross-linking study
ATP2B1	YWHAE	EBI-7695875	coimmunoprecipitation
ATP2B2	SCRIB	EBI-20730845	p8 filamentous phage display
ATP2B4	CALCA	EBI-7542824	anti bait coimmunoprecipitation
ATP5F1B	DDX60L	EBI-20903704	cross-linking study
ATP5F1B	FIS1	EBI-10091713	fluorescence microscopy
ATP5F1B	TTN	EBI-20933796	cross-linking study
ATP5F1D	TTN	EBI-5665688	two hybrid fragment pooling approach
ATP5MC2	ATP13A2	EBI-6377451	ubiquitin reconstruction
ATP5MG	HLA-B	EBI-1082305	anti bait coimmunoprecipitation
ATP5PF	SFT2D2	EBI-20064855	two hybrid array
ATP6AP2	CREB3	EBI-22119907	two hybrid array
ATP6AP2	NSG1	EBI-19485587	two hybrid prey pooling approach
ATP6AP2	PTTG1IP	EBI-19485535	two hybrid prey pooling approach
ATP6AP2	VAMP5	EBI-19485639	two hybrid prey pooling approach
ATP6V0C	DRD2	EBI-20805650	ubiquitin reconstruction
ATP6V0C	MDFI	EBI-8634486	two hybrid
ATP6V0C	MARK3	EBI-735055	two hybrid pooling approach
ATP6V0C	TMEM9	EBI-20149588	two hybrid array
ATP6V0C	AQP6	EBI-19855694	two hybrid array
ATP6V0C	PTPRE	EBI-21860623	anti tag coimmunoprecipitation
ATP6V0C	PDGFRB	EBI-7015527	coimmunoprecipitation
ATP6V0C	NIPAL3	EBI-18790204	two hybrid array
ATP6V0C	VSIR	EBI-18768996	two hybrid array
ATP6V0C	STOM	EBI-20026053	two hybrid array
ATP6V0C	ZCCHC12	EBI-19974787	two hybrid array
ATP6V0C	GPR42	EBI-19849571	two hybrid array
ATP6V0C	SSMEM1	EBI-19712818	two hybrid array
ATP6V0C	SUSD3	EBI-19542858	two hybrid prey pooling approach
ATP6V0C	RETREG3	EBI-19096348	two hybrid prey pooling approach
ATP6V0C	LY49L	EBI-19289751	two hybrid prey pooling approach
ATP6V0C	NAALADL2	EBI-19228746	two hybrid prey pooling approach
ATP6V0C	LRRC25	EBI-19313366	two hybrid prey pooling approach
ATP6V0C	SLC7A1	EBI-19107940	two hybrid prey pooling approach
ATP6V0C	SLC35E3	EBI-19114942	two hybrid prey pooling approach
ATP6V0C	CD53	EBI-19127458	two hybrid prey pooling approach
ATP6V0C	KLRC1	EBI-19249918	two hybrid prey pooling approach
ATP6V0C	EDA2R	EBI-19236976	two hybrid prey pooling approach
ATP6V0C	CERS2	EBI-3930405	two hybrid
ATP6V0D1	RBPMS	EBI-11780167	validated two hybrid
ATP6V0D1	DMRT3	EBI-18831625	two hybrid array
ATP6V1A	HLA-B	EBI-1075792	anti bait coimmunoprecipitation
ATP6V1A	KIAA0895	EBI-20928888	cross-linking study
ATP6V1A	ANXA7	EBI-7096332	two hybrid
ATP6V1A	CDKN1A	EBI-7120062	two hybrid
ATP6V1A	SMN1	EBI-7388487	two hybrid
ATP6V1A	TK1	EBI-7395500	two hybrid
ATP6V1B1	ATP6V0A1	EBI-2891311	fluorescence microscopy
ATP6V1B1	KDM1A	EBI-8464583	two hybrid
ATP6V1E1	DEDD	EBI-2684406	display technology
ATP6V1G1	ATP6V1E1	EBI-728751	two hybrid pooling approach
ATP6V1G2	ATP6V1E1	EBI-348898	two hybrid
ATP7A	HNRNPD	EBI-20937244	cross-linking study
ATP7B	ATOX1	EBI-11668564	pull down
ATP9A	PSEN1	EBI-21139722	proximity ligation assay
ATXN1	BASP1	EBI-6450933	two hybrid prey pooling approach
ATXN1	ATP6V0D1	EBI-955414	two hybrid array
ATXN10	PHB2	EBI-1079000	anti bait coimmunoprecipitation
ATXN1L	SHISA2	EBI-19475422	two hybrid prey pooling approach
ATXN2	DDX6	EBI-6550791	confocal microscopy
B2M	HLA-B	EBI-8677464	x-ray crystallography
B2M	CD244	EBI-15013522	anti bait coimmunoprecipitation
B2M	HSPB2	EBI-15488130	two hybrid
B2M	OSBP	EBI-20911136	cross-linking study
B2M	MORC2	EBI-20933420	cross-linking study
B2M	OTOF	EBI-20905944	cross-linking study
B2M	HMCN1	EBI-20906296	cross-linking study
B2M	PRSS23	EBI-735827	two hybrid pooling approach
B2M	FCGRT	EBI-7366257	x-ray crystallography
B2M	HLA-A	EBI-14030163	anti bait coimmunoprecipitation
B2M	PCOLCE	EBI-9082737	surface plasmon resonance
B2M	MR1	EBI-16016863	ion exchange chromatography
B2M	CD1D	EBI-15643610	x-ray crystallography
B2M	GRB2	EBI-2115825	two hybrid
B9D1	TMEM231	EBI-11939388	inference by socio-affinity scoring
B9D2	TMEM231	EBI-11929352	inference by socio-affinity scoring
BAAT	CTNNA1	EBI-8996807	two hybrid array
BACE1	ITM2B	EBI-21011973	confocal microscopy
BACE1	APP	EBI-21201878	two hybrid
BAG2	CACYBP	EBI-9361819	luminescence based mammalian interactome mapping
BAG3	LITAF	EBI-10349823	two hybrid array
BAG6	RAB8A	EBI-735572	two hybrid pooling approach
BAG6	IGFBP5	EBI-734841	two hybrid pooling approach
BAG6	B2M	EBI-731371	two hybrid pooling approach
BAHCC1	CLSTN1	EBI-311615	two hybrid
BAIAP2	VASP	EBI-9201953	pull down
BAIAP3	PHB	EBI-20901240	cross-linking study
BANF1	HLA-B	EBI-1083050	anti bait coimmunoprecipitation
BANP	PPIC	EBI-18894918	two hybrid prey pooling approach
BANP	FLOT1	EBI-20155921	two hybrid array
BASP1	RIPK3	EBI-363859	tandem affinity purification
BAZ2B	HMGN2	EBI-20899762	cross-linking study
BAZ2B	PICALM	EBI-21378862	two hybrid fragment pooling approach
BBS1	RAB8A	EBI-11923210	inference by socio-affinity scoring
BBS2	FLOT1	EBI-1805981	two hybrid
BCAP31	FIS1	EBI-4394311	anti tag coimmunoprecipitation
BCAP31	HLA-B	EBI-1084889	anti bait coimmunoprecipitation
BCAR1	IQGAP1	EBI-15187069	pull down
BCAS3	PHB	EBI-9069461	two hybrid array
BCL2L13	STX12	EBI-18768745	two hybrid array
BCL2L2	CLDN7	EBI-19348902	two hybrid prey pooling approach
BCR	ATP2B1	EBI-7358710	fluorescence microscopy
BDKRB2	CD81	EBI-20803419	ubiquitin reconstruction
BECN1	RAB39B	EBI-10767289	anti tag coimmunoprecipitation
BEGAIN	QSOX1	EBI-3920902	two hybrid array
BEGAIN	DDX6	EBI-18987039	two hybrid prey pooling approach
BET1	CLDN7	EBI-19347167	two hybrid prey pooling approach
BET1	STX4	EBI-10490643	anti tag coimmunoprecipitation
BHLHB9	DDX6	EBI-20132902	two hybrid array
BICD2	RANBP2	EBI-15848010	anti bait coimmunoprecipitation
BID	RHOA	EBI-6592791	proximity ligation assay
BIRC5	XPO1	EBI-7087183	pull down
BIRC6	EXOC4	EBI-1765716	anti bait coimmunoprecipitation
BIRC7	DDX6	EBI-10519546	validated two hybrid
BLZF1	RAB2A	EBI-22129986	two hybrid array
BMP10	CLDN7	EBI-19349166	two hybrid prey pooling approach
BNIP2	SFT2D2	EBI-19333925	two hybrid prey pooling approach
BNIP3	CLDN9	EBI-19687341	two hybrid array
BNIP3L	ATP13A2	EBI-6377441	ubiquitin reconstruction
BOC	IHH	EBI-20561144	x-ray crystallography
BORCS8	AGR2	EBI-18825921	two hybrid array
BORCS8	CTAG1A	EBI-19460134	two hybrid prey pooling approach
BRAF	CTSV	EBI-8995539	two hybrid array
BRAF	NRAS	EBI-15920647	anti tag coimmunoprecipitation
BRAF	IQGAP1	EBI-15642473	pull down
BRAT1	NMI	EBI-18959768	two hybrid prey pooling approach
BRAT1	ENKD1	EBI-18959843	two hybrid prey pooling approach
BRAT1	MSGN1	EBI-18959895	two hybrid prey pooling approach
BRAT1	BRCA1	EBI-10826360	confocal microscopy
BSG	APP	EBI-20977205	anti bait coimmunoprecipitation
BSND	IGFBP5	EBI-19511516	two hybrid prey pooling approach
BST2	CD81	EBI-19078087	two hybrid prey pooling approach
BTF3	HLA-B	EBI-1082020	anti bait coimmunoprecipitation
BTRC	CUL1	EBI-7280263	anti bait coimmunoprecipitation
C11orf68	EIF4H	EBI-10306323	two hybrid prey pooling approach
C1orf94	TNPO2	EBI-10339619	two hybrid array
C1QBP	KNG1	EBI-6378884	filter binding
C1QTNF9	RDX	EBI-5654860	two hybrid fragment pooling approach
C20orf194	CACYBP	EBI-9372367	luminescence based mammalian interactome mapping
C3	CFHR4	EBI-22179642	enzyme linked immunosorbent assay
C3	CFB	EBI-15762304	surface plasmon resonance
C3	ASF1B	EBI-1075489	anti bait coimmunoprecipitation
C3	GOLGA6L9	EBI-20128900	two hybrid array
C3	VHL	EBI-1069399	anti bait coimmunoprecipitation
C3	AGR2	EBI-18833606	two hybrid array
C3	KRTAP10-8	EBI-19598601	two hybrid array
C3	EFEMP2	EBI-20119564	two hybrid array
C3	KRT31	EBI-19534955	two hybrid prey pooling approach
C3	PLEKHF2	EBI-18924934	two hybrid prey pooling approach
C3	TGM2	EBI-3927482	two hybrid
C3	RALA	EBI-1042094	x-ray crystallography
C4A	APC	EBI-3437910	two hybrid pooling approach
C4A	TMEM89	EBI-21840021	anti tag coimmunoprecipitation
C4orf3	CLDN9	EBI-19687259	two hybrid array
C5	KEL	EBI-20083929	two hybrid array
C5	POU6F2	EBI-19841817	two hybrid array
C5	NEMP1	EBI-19437624	two hybrid prey pooling approach
C5	CPLX4	EBI-19363194	two hybrid prey pooling approach
C5	PGRMC2	EBI-18959386	two hybrid prey pooling approach
C5	NAALADL2	EBI-19230010	two hybrid prey pooling approach
C5	CREB3L1	EBI-10351039	two hybrid array
C5AR2	SCRIB	EBI-20803808	ubiquitin reconstruction
C5AR2	ACO2	EBI-20803696	ubiquitin reconstruction
C5AR2	ABCA7	EBI-20803706	ubiquitin reconstruction
C5AR2	C4orf3	EBI-20803726	ubiquitin reconstruction
C5AR2	HERC2	EBI-20803736	ubiquitin reconstruction
C5AR2	HERPUD1	EBI-20803746	ubiquitin reconstruction
C5AR2	PLXDC1	EBI-20803798	ubiquitin reconstruction
C5AR2	HAGHL	EBI-20803756	ubiquitin reconstruction
C5AR2	SLC26A11	EBI-20803838	ubiquitin reconstruction
C5AR2	SYNGR2	EBI-20803848	ubiquitin reconstruction
C5AR2	SCN1B	EBI-20803818	ubiquitin reconstruction
C5AR2	SLC25A11	EBI-20803828	ubiquitin reconstruction
C9orf72	RAB1A	EBI-16697672	pull down
CACYBP	HLA-B	EBI-1074980	anti bait coimmunoprecipitation
CACYBP	PRKAB1	EBI-1079642	anti bait coimmunoprecipitation
CACYBP	GH1	EBI-1075013	anti bait coimmunoprecipitation
CACYBP	NME2	EBI-1075281	anti bait coimmunoprecipitation
CACYBP	MPG	EBI-1077744	anti bait coimmunoprecipitation
CACYBP	EPB41	EBI-1081457	anti bait coimmunoprecipitation
CACYBP	IKBKE	EBI-1082413	anti bait coimmunoprecipitation
CACYBP	SKP2	EBI-9369031	luminescence based mammalian interactome mapping
CACYBP	HIG-1	EBI-9379566	luminescence based mammalian interactome mapping
CACYBP	ITPRIP	EBI-9379744	luminescence based mammalian interactome mapping
CACYBP	SMARCD2	EBI-9382321	luminescence based mammalian interactome mapping
CACYBP	EIF2AK4	EBI-9387129	luminescence based mammalian interactome mapping
CACYBP	TRIM17	EBI-9389804	luminescence based mammalian interactome mapping
CACYBP	CFLAR	EBI-9359465	luminescence based mammalian interactome mapping
CACYBP	TET3	EBI-9359825	luminescence based mammalian interactome mapping
CACYBP	REC8	EBI-9361411	luminescence based mammalian interactome mapping
CACYBP	MOS	EBI-9362625	luminescence based mammalian interactome mapping
CACYBP	ERBB2	EBI-9363493	luminescence based mammalian interactome mapping
CACYBP	ERCC2	EBI-9364159	luminescence based mammalian interactome mapping
CACYBP	GNAZ	EBI-9364386	luminescence based mammalian interactome mapping
CACYBP	MCM5	EBI-9365306	luminescence based mammalian interactome mapping
CACYBP	MCM7	EBI-9365515	luminescence based mammalian interactome mapping
CACYBP	CTNNB1	EBI-6594993	proximity ligation assay
CACYBP	RAC3	EBI-2693103	display technology
CACYBP	EIF1B	EBI-1067538	anti bait coimmunoprecipitation
CACYBP	TNIK	EBI-1073674	anti bait coimmunoprecipitation
CACYBP	MCC	EBI-1074203	anti bait coimmunoprecipitation
CACYBP	TFE3	EBI-1066842	anti bait coimmunoprecipitation
CACYBP	FTSJ1	EBI-1067217	anti bait coimmunoprecipitation
CACYBP	EIF6	EBI-1061803	anti bait coimmunoprecipitation
CACYBP	TRAF6	EBI-1060566	anti bait coimmunoprecipitation
CACYBP	BEX3	EBI-3943206	two hybrid
CACYBP	PINX1	EBI-3924237	two hybrid array
CALCOCO2	LGALS8	EBI-10498814	validated two hybrid
CALM1	RALA	EBI-8439316	two hybrid
CALM1	HLA-C	EBI-1073944	anti bait coimmunoprecipitation
CALM1	HLA-B	EBI-1081069	anti bait coimmunoprecipitation
CALR	RDX	EBI-20902208	cross-linking study
CALR	B2M	EBI-6589747	proximity ligation assay
CALR	APP	EBI-9005337	pull down
CALU	TTN	EBI-20906568	cross-linking study
CAMK2D	TNPO2	EBI-10181602	two hybrid prey pooling approach
CAND1	CUL1	EBI-16128794	pull down
CAND2	STOM	EBI-11902911	inference by socio-affinity scoring
CANX	NDRG1	EBI-1191213	anti bait coimmunoprecipitation
CAPN1	TIRAP	EBI-6674069	protease assay
CAPN1	GRIN2B	EBI-6589725	proximity ligation assay
CAPN1	F2R	EBI-6595922	proximity ligation assay
CAPN1	PTPN1	EBI-8669307	protease assay
CAPN1	CLEC4G	EBI-2117430	two hybrid
CAPN10	FLOT1	EBI-3922047	two hybrid array
CAPN2	CAPNS1	EBI-1028987	x-ray crystallography
CAPN6	EZR	EBI-7814930	pull down
CAPN6	SLC9A3R1	EBI-7814911	pull down
CAPNS1	RAB1A	EBI-735536	two hybrid pooling approach
CAPNS1	GNB2	EBI-732037	two hybrid pooling approach
CAPNS1	FMR1	EBI-21389954	two hybrid fragment pooling approach
CAPNS1	ARR3	EBI-733901	two hybrid pooling approach
CAPNS1	ATP5MF	EBI-733980	two hybrid pooling approach
CAPNS1	DRG1	EBI-734383	two hybrid pooling approach
CAPNS1	TERF1	EBI-736004	two hybrid pooling approach
CAPNS1	LRRCC1	EBI-737012	two hybrid pooling approach
CAPNS1	CDK4	EBI-728826	two hybrid pooling approach
CAPNS1	GET4	EBI-731479	two hybrid pooling approach
CAPNS1	C8orf37	EBI-12449224	tandem affinity purification
CAPNS1	PPARGC1A	EBI-3927762	two hybrid
CAPNS1	TRAF5	EBI-3906354	two hybrid array
CAPNS2	PPIC	EBI-18838443	two hybrid array
CAPRIN1	HLA-B	EBI-1077309	anti bait coimmunoprecipitation
CAPZA1	HLA-B	EBI-1076847	anti bait coimmunoprecipitation
CASC3	PHB	EBI-9069474	two hybrid array
CASP6	APP	EBI-6595237	proximity ligation assay
CASP8	TNFRSF10A	EBI-2358618	confocal microscopy
CAT	RAB14	EBI-8304884	fluorescence microscopy
CAV1	FLOT1	EBI-603655	anti bait coimmunoprecipitation
CAVIN1	MYH14	EBI-20918828	cross-linking study
CBARP	SLC35F6	EBI-19051351	two hybrid prey pooling approach
CBFA2T2	TCP1	EBI-10200111	two hybrid prey pooling approach
CBFB	APP	EBI-2691937	display technology
CBR1	HLA-C	EBI-1069903	anti bait coimmunoprecipitation
CBR1	HLA-B	EBI-1086244	anti bait coimmunoprecipitation
CBR3	RAB35	EBI-735563	two hybrid pooling approach
CCDC102B	FLOT1	EBI-20155975	two hybrid array
CCDC14	DDX6	EBI-19986489	two hybrid array
CCDC155	CRABP2	EBI-10361997	two hybrid array
CCDC155	ITM2B	EBI-10325842	two hybrid prey pooling approach
CCDC155	FIS1	EBI-10480379	two hybrid array
CCDC155	VTI1B	EBI-19028406	two hybrid prey pooling approach
CCDC155	STX12	EBI-19029245	two hybrid prey pooling approach
CCDC180	NRAS	EBI-8999785	two hybrid array
CCDC180	CTNNA1	EBI-8996898	two hybrid array
CCDC36	ATP6V0D1	EBI-11779271	validated two hybrid
CCDC57	HBA1	EBI-10221160	two hybrid prey pooling approach
CCDC88A	PLEC	EBI-11914277	inference by socio-affinity scoring
CCKBR	ATP13A2	EBI-6377353	ubiquitin reconstruction
CCNC	GPC4	EBI-8648142	two hybrid
CCND1	RALA	EBI-3956368	confocal microscopy
CCNF	CUL1	EBI-15863048	anti tag coimmunoprecipitation
CCNH	CCT4	EBI-19386521	two hybrid prey pooling approach
CCNY	CUL1	EBI-9392468	anti tag coimmunoprecipitation
CCR1	QSOX1	EBI-20803918	ubiquitin reconstruction
CCR2	ATP2B1	EBI-20803958	ubiquitin reconstruction
CCR2	CD81	EBI-20803998	ubiquitin reconstruction
CCR2	SLC2A1	EBI-20804258	ubiquitin reconstruction
CCR2	CACYBP	EBI-20803978	ubiquitin reconstruction
CCR2	APP	EBI-20803948	ubiquitin reconstruction
CCR6	QSOX1	EBI-20804753	ubiquitin reconstruction
CCR9	CD81	EBI-20805012	ubiquitin reconstruction
CCT2	CCT5	EBI-20908328	cross-linking study
CCT2	CCT4	EBI-19386547	two hybrid prey pooling approach
CCT2	TCP1	EBI-20906936	cross-linking study
CCT4	TCP1	EBI-20906944	cross-linking study
CCT4	MAP3K1	EBI-362019	tandem affinity purification
CCT4	MAP3K3	EBI-362460	tandem affinity purification
CCT4	RELA	EBI-363427	tandem affinity purification
CCT4	TBK1	EBI-364315	tandem affinity purification
CCT4	ASTN2	EBI-21872337	anti tag coimmunoprecipitation
CCT5	SLC4A8	EBI-20905904	cross-linking study
CCT5	PNPLA8	EBI-20906688	cross-linking study
CCT5	IKBKE	EBI-361311	tandem affinity purification
CCT5	MAP3K1	EBI-361827	tandem affinity purification
CCT5	MAP3K3	EBI-362139	tandem affinity purification
CCT5	RIPK3	EBI-363766	tandem affinity purification
CCT5	TBK1	EBI-364231	tandem affinity purification
CCT5	XRN1	EBI-374088	two hybrid
CCT5	ZNRD2	EBI-18847574	two hybrid array
CCT7	RAP1B	EBI-7338469	two hybrid
CCT8	TCP1	EBI-20911408	cross-linking study
CCT8	CCT6A	EBI-20904088	cross-linking study
CCT8	MAP3K1	EBI-361797	tandem affinity purification
CCT8	MAP3K3	EBI-362073	tandem affinity purification
CCT8	RELA	EBI-363211	tandem affinity purification
CCT8	TBK1	EBI-364213	tandem affinity purification
CCT8	YWHAZ	EBI-7194588	pull down
CD1A	B2M	EBI-1036784	x-ray crystallography
CD1B	B2M	EBI-1033800	x-ray crystallography
CD24	LYN	EBI-6274318	anti bait coimmunoprecipitation
CD2AP	IQGAP1	EBI-6898137	proximity ligation assay
CD36	LYN	EBI-13941132	pull down
CD37	LYN	EBI-6139462	anti bait coimmunoprecipitation
CD44	HYAL2	EBI-11665428	anti bait coimmunoprecipitation
CD44	EZR	EBI-6096006	anti bait coimmunoprecipitation
CD46	C3	EBI-6858868	enzyme linked immunosorbent assay
CD6	LGALS1	EBI-9539153	pull down
CD63	TIMP1	EBI-8617052	imaging technique
CD69	ATP6V0C	EBI-18833840	two hybrid array
CD72	CLDN7	EBI-19348227	two hybrid prey pooling approach
CD79A	MYADM	EBI-19421844	two hybrid prey pooling approach
CD79A	ATP6V0C	EBI-19421061	two hybrid prey pooling approach
CD79A	VTI1B	EBI-19420749	two hybrid prey pooling approach
CD79A	STX12	EBI-19422475	two hybrid prey pooling approach
CD81	HLA-B	EBI-1076822	anti bait coimmunoprecipitation
CD81	INO80B	EBI-732124	two hybrid pooling approach
CD81	TRAF6	EBI-1082233	anti bait coimmunoprecipitation
CD81	TREX1	EBI-20155242	two hybrid array
CD81	AQP6	EBI-19855274	two hybrid array
CD81	LHFPL5	EBI-19927068	two hybrid array
CD81	EBP	EBI-19992079	two hybrid array
CD81	SLC26A6	EBI-19796608	two hybrid array
CD81	SDHAF4	EBI-19510461	two hybrid prey pooling approach
CD81	PDZK1IP1	EBI-19356805	two hybrid prey pooling approach
CD81	STX1A	EBI-19167548	two hybrid prey pooling approach
CD81	GORAB	EBI-19172469	two hybrid prey pooling approach
CD81	MCEE	EBI-19216535	two hybrid prey pooling approach
CD81	GPX8	EBI-19223011	two hybrid prey pooling approach
CD81	GJA4	EBI-19324137	two hybrid prey pooling approach
CD82	TIMP1	EBI-9679918	confocal microscopy
CD8A	CACYBP	EBI-3909487	two hybrid array
CD9	SRGAP1	EBI-20911768	cross-linking study
CD99	MTNR1A	EBI-11576912	two hybrid
CD99	MTNR1B	EBI-11577263	two hybrid
CDC25A	XPO1	EBI-3906394	two hybrid array
CDC34	CUL1	EBI-2507476	cross-linking study
CDC37	FKBP4	EBI-9368120	luminescence based mammalian interactome mapping
CDC42	APOH	EBI-2116364	two hybrid
CDC42	RAB35	EBI-8593989	fluorescence microscopy
CDC42	LGALS1	EBI-2116422	two hybrid
CDC5L	SPTBN1	EBI-1106395	two hybrid
CDC73	GC	EBI-732007	two hybrid pooling approach
CDC73	ANXA6	EBI-733822	two hybrid pooling approach
CDCA3	CTDSP1	EBI-10294559	two hybrid prey pooling approach
CDH1	SCRIB	EBI-6993044	fluorescence microscopy
CDH23	CYFIP1	EBI-11919957	inference by socio-affinity scoring
CDKN1A	CLEC3B	EBI-7121001	two hybrid
CDKN1A	RAB1A	EBI-733058	two hybrid pooling approach
CDKN1B	RHOA	EBI-15783500	pull down
CDKN1B	CUL1	EBI-15528532	pull down
CDKN2A	CTSV	EBI-8996599	two hybrid array
CDKN2A	HLA-B	EBI-1076032	anti bait coimmunoprecipitation
CDON	IHH	EBI-20561155	x-ray crystallography
CENPV	LYN	EBI-7613090	pull down
CEP120	PSMG1	EBI-11922443	inference by socio-affinity scoring
CEP126	NSF	EBI-730414	two hybrid pooling approach
CEP290	RAB8A	EBI-11692790	anti tag coimmunoprecipitation
CEP350	APP	EBI-21393125	two hybrid fragment pooling approach
CEP55	RAB3D	EBI-3386211	two hybrid array
CEP63	SPTBN1	EBI-1106415	two hybrid
CEP70	DDX6	EBI-19653292	two hybrid array
CERS2	SLC39A1	EBI-3943226	two hybrid
CERS4	IGFBP5	EBI-18902517	two hybrid prey pooling approach
CERS4	STX7	EBI-18902413	two hybrid prey pooling approach
CERT	CSNK1G2	EBI-20148943	two hybrid array
CFH	C3	EBI-15912290	surface plasmon resonance
CFL2	RAB2A	EBI-18759769	two hybrid array
CFTR	SLC9A3R1	EBI-8756778	surface plasmon resonance
CHD2	PHB	EBI-2686210	display technology
CHD4	TTN	EBI-5665722	two hybrid fragment pooling approach
CHD9	APP	EBI-21389356	two hybrid fragment pooling approach
CHGB	RAP1B	EBI-7338649	two hybrid
CHGB	PICALM	EBI-21371287	two hybrid fragment pooling approach
CHI3L1	LGALS3	EBI-20263252	anti bait coimmunoprecipitation
CHLR1	CACYBP	EBI-9382681	luminescence based mammalian interactome mapping
CHMP1B	FLOT2	EBI-20912342	cross-linking study
CHMP1B	RAB11A	EBI-11511892	two hybrid
CHMP3	RAB11A	EBI-11512283	two hybrid
CHMP4B	CHMP6	EBI-11510183	two hybrid
CHMP6	PRDM10	EBI-20903368	cross-linking study
CHMP6	METTL9	EBI-11510841	two hybrid
CHMP6	ELOF1	EBI-11510845	two hybrid
CHMP6	TNPO3	EBI-11512605	two hybrid
CHMP6	CDK13	EBI-11512612	two hybrid
CHMP6	TRPC4AP	EBI-11512619	two hybrid
CHMP6	TTC19	EBI-11512626	two hybrid
CHMP6	USP54	EBI-8601437	pull down
CHMP6	RAB17	EBI-1073212	anti bait coimmunoprecipitation
CHMP6	VPS25	EBI-18918442	two hybrid prey pooling approach
CHP1	PRSS23	EBI-735830	two hybrid pooling approach
CHP1	PTP4A3	EBI-1063642	anti bait coimmunoprecipitation
CHP1	BRF2	EBI-1070780	anti bait coimmunoprecipitation
CHRM3	GNAS	EBI-20809866	ubiquitin reconstruction
CHRM4	QSOX1	EBI-20810126	ubiquitin reconstruction
CHRM4	CD81	EBI-20810086	ubiquitin reconstruction
CHRM4	B2M	EBI-20810066	ubiquitin reconstruction
CHRM5	ATP9A	EBI-20810414	ubiquitin reconstruction
CIDEB	CAND2	EBI-19221346	two hybrid prey pooling approach
CISD2	SMIM1	EBI-19064310	two hybrid prey pooling approach
CISD2	STX7	EBI-19063078	two hybrid prey pooling approach
CISD2	STX12	EBI-19063905	two hybrid prey pooling approach
CKMT1A	HLA-B	EBI-1084751	anti bait coimmunoprecipitation
CLDN2	IGFBP5	EBI-18945599	two hybrid prey pooling approach
CLDN3	CTSS	EBI-16115654	protease assay
CLDN4	AQP6	EBI-19855053	two hybrid array
CLDN4	TMEM237	EBI-19983296	two hybrid array
CLDN4	GJA8	EBI-19803564	two hybrid array
CLDN6	IGFBP5	EBI-18758864	two hybrid array
CLDN7	TMEM140	EBI-19347262	two hybrid prey pooling approach
CLDN7	CD53	EBI-19348491	two hybrid prey pooling approach
CLDN7	TSPAN33	EBI-19348517	two hybrid prey pooling approach
CLDN7	CYB561D2	EBI-19348543	two hybrid prey pooling approach
CLDN7	UPK1B	EBI-19348569	two hybrid prey pooling approach
CLDN7	SCARF1	EBI-19348335	two hybrid prey pooling approach
CLDN7	ANKRD46	EBI-19348383	two hybrid prey pooling approach
CLDN7	GPR37L1	EBI-19348465	two hybrid prey pooling approach
CLDN7	ITM2A	EBI-19348439	two hybrid prey pooling approach
CLDN7	RTP2	EBI-19348824	two hybrid prey pooling approach
CLDN7	CXCL9	EBI-19348798	two hybrid prey pooling approach
CLDN7	VAMP5	EBI-19348772	two hybrid prey pooling approach
CLDN7	OSTCL	EBI-19348746	two hybrid prey pooling approach
CLDN7	AIG1	EBI-19348690	two hybrid prey pooling approach
CLDN7	ASGR1	EBI-19348664	two hybrid prey pooling approach
CLDN7	JAGN1	EBI-19348638	two hybrid prey pooling approach
CLDN7	TMEM60	EBI-19348608	two hybrid prey pooling approach
CLDN7	NIPAL4	EBI-19349218	two hybrid prey pooling approach
CLDN9	RPRM	EBI-19687217	two hybrid array
CLDN9	MALL	EBI-19687165	two hybrid array
CLDN9	STX8	EBI-19687139	two hybrid array
CLDN9	MAL	EBI-19687191	two hybrid array
CLDN9	CCL4L1	EBI-19687581	two hybrid array
CLDN9	PLPP6	EBI-19687555	two hybrid array
CLDN9	ADIPOQ	EBI-19687529	two hybrid array
CLDN9	GRM2	EBI-19687503	two hybrid array
CLDN9	OSTCL	EBI-19687477	two hybrid array
CLDN9	EXTL1	EBI-19687451	two hybrid array
CLDN9	AOC3	EBI-19687425	two hybrid array
CLDN9	EMP1	EBI-19687399	two hybrid array
CLEC14A	CLDN4	EBI-19012351	two hybrid prey pooling approach
CLEC14A	ATP6V0C	EBI-19012497	two hybrid prey pooling approach
CLEC17A	IGFBP5	EBI-19640755	two hybrid array
CLEC17A	ATP6V0C	EBI-19640833	two hybrid array
CLEC2D	ATP6V0C	EBI-18999179	two hybrid prey pooling approach
CLEC3B	FMR1	EBI-21387855	two hybrid fragment pooling approach
CLEC3B	DISC1	EBI-21387870	two hybrid fragment pooling approach
CLEC3B	OTUD4	EBI-1074793	anti bait coimmunoprecipitation
CLEC3B	GADD45A	EBI-7152666	two hybrid
CLEC3B	GSK3B	EBI-7163232	two hybrid
CLEC3B	TK1	EBI-7396224	two hybrid
CLEC3B	FGF13	EBI-1065447	anti bait coimmunoprecipitation
CLEC4G	APOH	EBI-2117347	two hybrid
CLIC1	ATP6V0C	EBI-3904646	two hybrid array
CLIP4	TTN	EBI-5655868	two hybrid fragment pooling approach
CLN6	CLDN7	EBI-19347314	two hybrid prey pooling approach
CLPP	HLA-B	EBI-1075201	anti bait coimmunoprecipitation
CLSTN1	APBA2	EBI-7298510	anti tag coimmunoprecipitation
CLSTN1	GTF2F2	EBI-2686894	display technology
CLTC	HLA-C	EBI-1073834	anti bait coimmunoprecipitation
CLTCL1	TNFRSF1A	EBI-364411	tandem affinity purification
CMTM5	CLDN7	EBI-19347223	two hybrid prey pooling approach
CMTM6	ATP13A2	EBI-7128118	two hybrid
CNDP2	NDRG1	EBI-1190746	anti bait coimmunoprecipitation
CNIH1	CLDN7	EBI-19349114	two hybrid prey pooling approach
CNKSR1	RHOA	EBI-1245005	anti tag coimmunoprecipitation
CNNM3	PTP4A2	EBI-1081810	anti bait coimmunoprecipitation
CNOT8	MARCKS	EBI-1070016	anti bait coimmunoprecipitation
CNOT8	EZR	EBI-1062456	anti bait coimmunoprecipitation
CNOT8	CACYBP	EBI-1072250	anti bait coimmunoprecipitation
COL4A5	CLDN7	EBI-19349192	two hybrid prey pooling approach
COMMD1	ATP7B	EBI-11668785	anti tag coimmunoprecipitation
COMMD1	CUL1	EBI-1551249	anti bait coimmunoprecipitation
COMP	AQP1	EBI-19586463	two hybrid array
COMP	CREB5	EBI-19586517	two hybrid array
COMP	ATOX1	EBI-19586545	two hybrid array
COMP	CYSRT1	EBI-19264932	two hybrid prey pooling approach
COMP	MATN3	EBI-6262487	enzyme linked immunosorbent assay
COMP	ADAMTS7	EBI-9032726	protease assay
COMT	SLC48A1	EBI-18927495	two hybrid prey pooling approach
COMT	TMEM50A	EBI-18830815	two hybrid array
COMT	SLC16A7	EBI-19608976	two hybrid array
COMT	SLC39A1	EBI-18818657	two hybrid array
COMT	RAB14	EBI-11906263	inference by socio-affinity scoring
COMT	RAB2A	EBI-11906254	inference by socio-affinity scoring
COMT	LITAF	EBI-737030	two hybrid pooling approach
COPB2	NDRG1	EBI-1190516	anti bait coimmunoprecipitation
COPG1	CACYBP	EBI-9389889	luminescence based mammalian interactome mapping
COPG1	PHB2	EBI-1061470	anti bait coimmunoprecipitation
COPG1	HLA-B	EBI-1084334	anti bait coimmunoprecipitation
COPS3	ARF4	EBI-20074621	two hybrid array
COPS5	APP	EBI-21371087	two hybrid fragment pooling approach
COPS6	SLC2A1	EBI-733325	two hybrid pooling approach
COQ8A	TPD52L2	EBI-20007820	two hybrid array
CORO1A	DKK1	EBI-1082786	anti bait coimmunoprecipitation
CORO2A	NRAS	EBI-8999707	two hybrid array
CORO7	CUL1	EBI-8527588	anti tag coimmunoprecipitation
COX5B	ATP2B4	EBI-20901416	cross-linking study
COX5B	FLOT1	EBI-20155869	two hybrid array
CPEB1	SLC16A7	EBI-3921257	two hybrid array
CPLANE2	IMPDH2	EBI-10298544	two hybrid prey pooling approach
CPLX4	CD81	EBI-19361860	two hybrid prey pooling approach
CPLX4	ATP6V0C	EBI-19362055	two hybrid prey pooling approach
CPLX4	TF	EBI-19362670	two hybrid prey pooling approach
CPNE3	ANXA5	EBI-11902866	inference by socio-affinity scoring
CPNE8	SCRIB	EBI-20730361	p8 filamentous phage display
CPSF1	RPP38	EBI-20922206	cross-linking study
CPSF1	PRRC2A	EBI-348853	two hybrid
CPSF1	DDIT4L	EBI-20036647	two hybrid array
CPSF1	INCA1	EBI-19549930	two hybrid prey pooling approach
CPSF1	GLYR1	EBI-19176865	two hybrid prey pooling approach
CPSF6	ANXA5	EBI-11915062	inference by socio-affinity scoring
CPSF6	HLA-B	EBI-1085423	anti bait coimmunoprecipitation
CPT1A	CACYBP	EBI-9366231	luminescence based mammalian interactome mapping
CRABP2	ACTN2	EBI-12712652	two hybrid array
CRAT	CACYBP	EBI-9365906	luminescence based mammalian interactome mapping
CRAT	SPTBN1	EBI-20934116	cross-linking study
CREB1	RAB1A	EBI-735539	two hybrid pooling approach
CREB3	FXYD3	EBI-8639383	two hybrid
CREB3	SERPING1	EBI-12713930	two hybrid array
CREB3	ITM2B	EBI-22121939	two hybrid array
CREB3	ZDHHC9	EBI-12714066	two hybrid array
CREB3	STX7	EBI-8637846	two hybrid
CREB3	ATP6V0C	EBI-22120040	two hybrid array
CREB3	SLC2A1	EBI-12714390	two hybrid array
CREB3	VTI1B	EBI-22139811	two hybrid array
CREB3	IGFBP5	EBI-12713774	two hybrid array
CREB3L1	FXYD3	EBI-8639366	two hybrid
CREB3L1	SMIM1	EBI-18966584	two hybrid prey pooling approach
CREB3L1	STX7	EBI-18962091	two hybrid prey pooling approach
CRHR1	SCRIB	EBI-20731301	p8 filamentous phage display
CRK	SEMA4D	EBI-10702391	validated two hybrid
CRK	TGOLN2	EBI-1960070	peptide array
CRK	HLA-B	EBI-1085382	anti bait coimmunoprecipitation
CRNN	ANXA5	EBI-11936342	inference by socio-affinity scoring
CRYBA4	EFEMP1	EBI-12714700	two hybrid array
CS	HLA-B	EBI-1080268	anti bait coimmunoprecipitation
CSAD	RAP1B	EBI-7338845	two hybrid
CSDE1	HLA-B	EBI-1078383	anti bait coimmunoprecipitation
CSF1R	CTDSP1	EBI-20981208	ubiquitin reconstruction
CSNK1A1	GNB2	EBI-3907887	two hybrid array
CSNK1G2	WDCP	EBI-7130612	two hybrid
CSNK1G2	CSNK1G1	EBI-21878581	anti tag coimmunoprecipitation
CSNK1G2	LRRK2	EBI-10108096	protein kinase assay
CSNK1G2	KRTAP10-7	EBI-10529920	validated two hybrid
CSNK2A2	ASL	EBI-3926405	two hybrid
CSNK2B	CD81	EBI-3926415	two hybrid
CSNK2B	LYN	EBI-348799	two hybrid
CSRP3	FHL1	EBI-5658724	two hybrid fragment pooling approach
CST3	ATXN1	EBI-951796	two hybrid
CSTB	HLA-B	EBI-1081341	anti bait coimmunoprecipitation
CSTF2T	CTDSP1	EBI-18897818	two hybrid prey pooling approach
CTDSP1	SCNM1	EBI-18897515	two hybrid prey pooling approach
CTDSP1	RAB3IL1	EBI-18897489	two hybrid prey pooling approach
CTDSP1	FAM110A	EBI-18897463	two hybrid prey pooling approach
CTDSP1	YPEL5	EBI-18897437	two hybrid prey pooling approach
CTDSP1	TEKT4	EBI-18897385	two hybrid prey pooling approach
CTDSP1	STRA8	EBI-18898130	two hybrid prey pooling approach
CTDSP1	ACTN3	EBI-18898078	two hybrid prey pooling approach
CTDSP1	PDZD4	EBI-18898052	two hybrid prey pooling approach
CTDSP1	SDCBP	EBI-18898000	two hybrid prey pooling approach
CTDSP1	FAAP20	EBI-18897974	two hybrid prey pooling approach
CTDSP1	CDKN2C	EBI-18897948	two hybrid prey pooling approach
CTDSP1	NOXA1	EBI-18897922	two hybrid prey pooling approach
CTDSP1	FANCL	EBI-18897870	two hybrid prey pooling approach
CTDSP1	BAG3	EBI-18897632	two hybrid prey pooling approach
CTDSP1	CRYBA2	EBI-18897606	two hybrid prey pooling approach
CTDSP1	WWOX	EBI-18897580	two hybrid prey pooling approach
CTLA4	RAB8A	EBI-10783704	fluorescence microscopy
CTNNA1	CTSV	EBI-8996820	two hybrid array
CTNNA1	DISC1	EBI-21372710	two hybrid fragment pooling approach
CTNNA1	CEP350	EBI-16149274	anti tag coimmunoprecipitation
CTNNA1	ARMC8	EBI-21199790	two hybrid
CTNNA1	PARD3	EBI-7053356	anti bait coimmunoprecipitation
CTNNA1	SLC9A3R2	EBI-11907729	inference by socio-affinity scoring
CTNNA1	NEK4	EBI-11907720	inference by socio-affinity scoring
CTNNA1	ARRB2	EBI-6595768	proximity ligation assay
CTNNA1	FBP1	EBI-8996833	two hybrid array
CTNNA1	FRAT2	EBI-8996859	two hybrid array
CTNNA1	HRAS	EBI-8996872	two hybrid array
CTNNA1	HSD17B3	EBI-8996885	two hybrid array
CTNNA1	NANS	EBI-8996924	two hybrid array
CTNNA1	SFRP4	EBI-8996950	two hybrid array
CTNNA1	STX17	EBI-8996976	two hybrid array
CTNNA1	TDRD7	EBI-8996989	two hybrid array
CTNNA1	ZNF510	EBI-8997015	two hybrid array
CTNNA1	CTBP1	EBI-7138494	two hybrid
CTNNA1	CDH1	EBI-15993373	anti bait coimmunoprecipitation
CTNNA1	ECT2	EBI-15993443	anti bait coimmunoprecipitation
CTNNA1	LIMA1	EBI-15677150	anti bait coimmunoprecipitation
CTNNA1	MTNR1B	EBI-11577353	two hybrid
CTNNA3	GNB1	EBI-20012886	two hybrid array
CTNNB1	NDRG1	EBI-1190663	anti bait coimmunoprecipitation
CTNNB1	CTNNA1	EBI-8624644	anti bait coimmunoprecipitation
CTNNB1	PHB2	EBI-1085722	anti bait coimmunoprecipitation
CTNNB1	SCRIB	EBI-11795004	fluorescence microscopy
CTNND2	SCRIB	EBI-11791906	phage display
CTPS1	HLA-C	EBI-1071423	anti bait coimmunoprecipitation
CTPS1	HLA-B	EBI-1084925	anti bait coimmunoprecipitation
CTSA	CTNNBIP1	EBI-1063363	anti bait coimmunoprecipitation
CTSD	HBA1	EBI-7103680	protease assay
CTSD	APP	EBI-7103757	protease assay
CTSL	CTSV	EBI-21835317	anti tag coimmunoprecipitation
CTSV	RAB28	EBI-11902480	inference by socio-affinity scoring
CTSV	MLH1	EBI-8998666	two hybrid array
CTSV	SRC	EBI-9001584	two hybrid array
CTSV	APC	EBI-8994418	two hybrid array
CTSV	BMPR1A	EBI-8995323	two hybrid array
CTSV	BUB1	EBI-8995760	two hybrid array
CTSV	DCC	EBI-8997093	two hybrid array
CTSV	DLC1	EBI-8997275	two hybrid array
CTSZ	PLEC	EBI-20914600	cross-linking study
CUL1	NFKBIA	EBI-7629027	anti tag coimmunoprecipitation
CUL1	UBE2M	EBI-7629112	enzymatic study
CUL1	FBXO25	EBI-3454381	confocal microscopy
CUL1	CHEK1	EBI-7261378	anti bait coimmunoprecipitation
CUL1	TRAF6	EBI-1086130	anti bait coimmunoprecipitation
CUL1	FBXO4	EBI-8107957	anti tag coimmunoprecipitation
CUL1	FBXO6	EBI-8107971	anti tag coimmunoprecipitation
CUL1	HSP90AB1	EBI-6425316	luminescence based mammalian interactome mapping
CUL1	UBXN7	EBI-15976898	anti tag coimmunoprecipitation
CUL1	MED6	EBI-15978120	anti bait coimmunoprecipitation
CUL1	RPRM	EBI-1070028	anti bait coimmunoprecipitation
CUL1	MCC	EBI-1064002	anti bait coimmunoprecipitation
CUL1	CCDC22	EBI-10107406	pull down
CWC15	PHB	EBI-2686096	display technology
CXCR1	IGFBP5	EBI-19051704	two hybrid prey pooling approach
CXCR5	GNB3	EBI-9074192	anti bait coimmunoprecipitation
CXCR5	GNAQ	EBI-7276612	coimmunoprecipitation
CYB561	SLC39A1	EBI-18818631	two hybrid array
CYB561A3	CLDN7	EBI-19348093	two hybrid prey pooling approach
CYB5B	CLDN7	EBI-19347630	two hybrid prey pooling approach
CYB5R3	HBA1	EBI-16021753	anti bait coimmunoprecipitation
CYBC1	CLDN7	EBI-19347734	two hybrid prey pooling approach
CYBRD1	STX4	EBI-10242793	two hybrid prey pooling approach
CYCS	PHB	EBI-20903264	cross-linking study
CYCS	PHB2	EBI-20901224	cross-linking study
CYCS	HLA-B	EBI-1085583	anti bait coimmunoprecipitation
CYFIP1	PPP1CC	EBI-4311602	two hybrid
CYFIP1	MYO16	EBI-7447809	anti tag coimmunoprecipitation
CYFIP1	YWHAG	EBI-1067488	anti bait coimmunoprecipitation
CYFIP1	RFX6	EBI-3925636	two hybrid array
CYFIP2	CYFIP1	EBI-3649667	confocal microscopy
CYLC2	NRAS	EBI-8999720	two hybrid array
CYSLTR2	GNAS	EBI-20805250	ubiquitin reconstruction
CYSLTR2	SCRIB	EBI-20731048	p8 filamentous phage display
DAD1	HLA-B	EBI-1077237	anti bait coimmunoprecipitation
DARS	NDRG1	EBI-1190800	anti bait coimmunoprecipitation
DBN1	FHL1	EBI-7150059	two hybrid
DCP1A	DDX6	EBI-1163041	anti tag coimmunoprecipitation
DCTN2	VTI1B	EBI-11912917	inference by socio-affinity scoring
DCTPP1	HLA-B	EBI-1075444	anti bait coimmunoprecipitation
DDIT4L	CCT8	EBI-20043301	two hybrid array
DDIT4L	DDX6	EBI-20041067	two hybrid array
DDOST	HLA-B	EBI-1082377	anti bait coimmunoprecipitation
DDT	HLA-B	EBI-1081522	anti bait coimmunoprecipitation
DDX17	DDX6	EBI-18991245	two hybrid prey pooling approach
DDX20	PHB2	EBI-1075830	anti bait coimmunoprecipitation
DDX21	HLA-B	EBI-1080363	anti bait coimmunoprecipitation
DDX6	MAPT	EBI-21002455	pull down
DDX6	UPF1	EBI-4302807	confocal microscopy
DDX6	ATG12	EBI-1076316	anti bait coimmunoprecipitation
DDX6	SGK1	EBI-1077152	anti bait coimmunoprecipitation
DDX6	SRPK2	EBI-6657443	protein kinase assay
DDX6	POLR1E	EBI-1073954	anti bait coimmunoprecipitation
DDX6	YWHAQ	EBI-1071132	anti bait coimmunoprecipitation
DDX6	LZTS1	EBI-19919132	two hybrid array
DDX6	REXO1L1P	EBI-19903381	two hybrid array
DDX6	GIGYF1	EBI-19913200	two hybrid array
DDX6	ZRANB1	EBI-19830944	two hybrid array
DDX6	POU6F2	EBI-19840832	two hybrid array
DDX6	PICK1	EBI-19759371	two hybrid array
DDX6	FXR1	EBI-19768228	two hybrid array
DDX6	CEP76	EBI-19463805	two hybrid prey pooling approach
DDX6	JAKMIP1	EBI-19094573	two hybrid prey pooling approach
DDX6	CNKSR3	EBI-19109318	two hybrid prey pooling approach
DDX6	TCF12	EBI-19140481	two hybrid prey pooling approach
DDX6	TLE5	EBI-10203801	two hybrid prey pooling approach
DDX6	KRT40	EBI-10203869	two hybrid prey pooling approach
DDX6	KRTAP10-8	EBI-10360999	two hybrid array
DDX6	CALCOCO2	EBI-10361031	two hybrid array
DDX6	PNMA5	EBI-10361149	two hybrid array
DDX6	ZNF24	EBI-10519444	validated two hybrid
DDX6	GOLGA2	EBI-10519454	validated two hybrid
DDX6	RUNDC3A	EBI-10519494	validated two hybrid
DDX6	BEND7	EBI-10519504	validated two hybrid
DDX6	ENTR1	EBI-10519536	validated two hybrid
DEAF1	FHL1	EBI-7150217	two hybrid
DES	DDX6	EBI-19197500	two hybrid prey pooling approach
DET1	CACYBP	EBI-9378751	luminescence based mammalian interactome mapping
DGKI	PHB2	EBI-20901216	cross-linking study
DHX9	HLA-B	EBI-1077913	anti bait coimmunoprecipitation
DIABLO	HLA-B	EBI-1080563	anti bait coimmunoprecipitation
DIAPH1	RHOC	EBI-6375279	pull down
DIAPH1	RHOA	EBI-6375257	pull down
DIAPH1	IQGAP1	EBI-6478462	anti bait coimmunoprecipitation
DISC1	GNB1	EBI-1105816	two hybrid
DISC1	DDX6	EBI-19739623	two hybrid array
DKK1	KRTAP10-1	EBI-22122213	two hybrid array
DKK1	SMAD9	EBI-7260449	two hybrid
DKK1	CTNNB1	EBI-6594817	proximity ligation assay
DKK1	KREMEN1	EBI-15656257	anti tag coimmunoprecipitation
DKK1	DPP4	EBI-3916703	two hybrid array
DLAT	HLA-B	EBI-1078081	anti bait coimmunoprecipitation
DLG1	EXOC4	EBI-11792964	phage display
DLG5	CD81	EBI-734135	two hybrid pooling approach
DMRTB1	VASP	EBI-2351433	two hybrid pooling approach
DNAJA1	HLA-B	EBI-1083927	anti bait coimmunoprecipitation
DNAJB1	NRAS	EBI-2117006	two hybrid
DNAJB11	RALA	EBI-20908488	cross-linking study
DNAJB5	TTN	EBI-5656094	two hybrid fragment pooling approach
DNAJB6	CAND2	EBI-5656188	two hybrid fragment pooling approach
DNAJB6	TTN	EBI-5656363	two hybrid fragment pooling approach
DNAJC1	ATP6V0C	EBI-19221433	two hybrid array
DNAJC3	SCN4A	EBI-20905952	cross-linking study
DNAJC5	HBA1	EBI-20735323	bioluminescence resonance energy transfer
DNAJC5	STX12	EBI-20735113	bioluminescence resonance energy transfer
DNAJC8	TNFRSF21	EBI-20931136	cross-linking study
DNM1L	SCRIB	EBI-11792160	phage display
DNM3	CACYBP	EBI-9388913	luminescence based mammalian interactome mapping
DOCK8	HBZ	EBI-10193634	two hybrid prey pooling approach
DRD1	ADORA1	EBI-21402605	confocal microscopy
DRG1	HLA-B	EBI-1078533	anti bait coimmunoprecipitation
DTNBP1	EXOC4	EBI-1106287	two hybrid
DTNBP1	RAB11A	EBI-1106257	two hybrid
DTX2	STX12	EBI-10260678	two hybrid prey pooling approach
DTX3	ARF5	EBI-19545183	two hybrid prey pooling approach
DUSP3	HLA-B	EBI-1084266	anti bait coimmunoprecipitation
DVL3	PLEC	EBI-11925907	inference by socio-affinity scoring
DYNC1H1	PHB2	EBI-1077808	anti bait coimmunoprecipitation
DYNLL1	HLA-B	EBI-1080584	anti bait coimmunoprecipitation
DYNLRB1	HLA-B	EBI-1074997	anti bait coimmunoprecipitation
DYSF	TTN	EBI-5657670	two hybrid fragment pooling approach
EBP	STX12	EBI-19994004	two hybrid array
ECH1	TIMP1	EBI-729363	two hybrid pooling approach
ECHS1	HLA-B	EBI-1081844	anti bait coimmunoprecipitation
ECM1	CFI	EBI-21888122	anti tag coimmunoprecipitation
EDA	ATP6V0C	EBI-10204441	two hybrid prey pooling approach
EDC3	DDX6	EBI-10519556	validated two hybrid
EDDM3B	CLDN7	EBI-19348980	two hybrid prey pooling approach
EEA1	RAB22A	EBI-399481	pull down
EEA1	RAB14	EBI-9029678	fluorescence microscopy
EEF1A1	NRAS	EBI-2117011	two hybrid
EEF1A2	IKBKG	EBI-361482	tandem affinity purification
EEF1A2	MAP3K1	EBI-361845	tandem affinity purification
EEF1A2	MAP3K3	EBI-362175	tandem affinity purification
EEF1A2	NFKB2	EBI-362758	tandem affinity purification
EEF1A2	RELA	EBI-363268	tandem affinity purification
EEF1A2	RIPK3	EBI-363793	tandem affinity purification
EEF1A2	TAB2	EBI-364060	tandem affinity purification
EEF1A2	TNFRSF1B	EBI-364618	tandem affinity purification
EEF1A2	TRADD	EBI-364843	tandem affinity purification
EEF1A2	TRAF2	EBI-365038	tandem affinity purification
EEF1A2	TRAF6	EBI-365140	tandem affinity purification
EEF1A2	MAP3K8	EBI-360714	tandem affinity purification
EEF1A2	CHUK	EBI-361173	tandem affinity purification
EEF1A2	LRRK2	EBI-6509067	protein kinase assay
EEF1A2	ST6GALNAC1	EBI-21881378	anti tag coimmunoprecipitation
EEF1A2	SLC13A5	EBI-21881365	anti tag coimmunoprecipitation
EEF1A2	TBXAS1	EBI-21881352	anti tag coimmunoprecipitation
EEF1B2	TIMP1	EBI-729366	two hybrid pooling approach
EEF1B2	EEF1A2	EBI-1067476	anti bait coimmunoprecipitation
EEF1B2	HLA-B	EBI-1077833	anti bait coimmunoprecipitation
EEF1D	EEF1A2	EBI-1064797	anti bait coimmunoprecipitation
EEF1D	HLA-B	EBI-1078609	anti bait coimmunoprecipitation
EEF1G	EFNA1	EBI-731767	two hybrid pooling approach
EEF1G	S100A13	EBI-20932016	cross-linking study
EEF1G	NDRG1	EBI-1190920	anti bait coimmunoprecipitation
EFEMP1	ATXN7	EBI-3866345	two hybrid
EFEMP1	CACNA1A	EBI-3867000	two hybrid
EFEMP1	RAF1	EBI-537251	two hybrid
EFEMP1	ARAF	EBI-537034	two hybrid
EFEMP1	GFI1B	EBI-953158	two hybrid
EFEMP1	RERE	EBI-953452	two hybrid
EFEMP1	ATN1	EBI-951118	two hybrid
EFEMP1	TFAP2C	EBI-9681003	two hybrid
EFEMP1	IGFBP6	EBI-18746662	two hybrid array
EFEMP1	ANAPC11	EBI-19646927	two hybrid array
EFEMP1	NR4A3	EBI-19956607	two hybrid array
EFEMP1	KRTAP6-1	EBI-20108946	two hybrid array
EFEMP1	BAG4	EBI-20120585	two hybrid array
EFEMP1	KRTAP19-2	EBI-19807237	two hybrid array
EFEMP1	LCE1C	EBI-19812814	two hybrid array
EFEMP1	LCE2C	EBI-19872592	two hybrid array
EFEMP1	LCE3A	EBI-19837582	two hybrid array
EFEMP1	CLPP	EBI-19786218	two hybrid array
EFEMP1	LINC00574	EBI-19356138	two hybrid prey pooling approach
EFEMP1	HOXA1	EBI-19090802	two hybrid prey pooling approach
EFEMP1	UBQLN2	EBI-18939384	two hybrid prey pooling approach
EFEMP1	LCE3D	EBI-18939358	two hybrid prey pooling approach
EFEMP1	MKRN3	EBI-18939332	two hybrid prey pooling approach
EFEMP1	MSRB3	EBI-18939306	two hybrid prey pooling approach
EFEMP1	HSD3B7	EBI-18939280	two hybrid prey pooling approach
EFEMP1	FAM110A	EBI-18939254	two hybrid prey pooling approach
EFEMP1	SLPI	EBI-19215539	two hybrid prey pooling approach
EFEMP1	CYSRT1	EBI-19256977	two hybrid prey pooling approach
EFEMP1	BAG5	EBI-19142275	two hybrid prey pooling approach
EFEMP1	SGTA	EBI-10545340	validated two hybrid
EFEMP1	TRAF2	EBI-10545778	validated two hybrid
EFEMP1	BAG6	EBI-10209561	two hybrid prey pooling approach
EFEMP1	KHDRBS1	EBI-3936126	two hybrid
EFHC2	CYFIP1	EBI-21248535	two hybrid array
EFHC2	DDX6	EBI-19966917	two hybrid array
EFNA1	HSCB	EBI-15104872	two hybrid
EFNA1	XRCC6	EBI-7146842	two hybrid
EFTUD2	CYFIP1	EBI-3917512	two hybrid array
EGFR	EZR	EBI-9689656	ubiquitin reconstruction
EGFR	FKBP4	EBI-4397289	ubiquitin reconstruction
EGFR	CTNNA1	EBI-6592824	proximity ligation assay
EGFR	LYN	EBI-6869575	anti bait coimmunoprecipitation
EGFR	ANXA2	EBI-16086970	anti bait coimmunoprecipitation
EGFR	IQGAP1	EBI-5480184	pull down
EGFR	APP	EBI-9688911	ubiquitin reconstruction
EIF1AD	MREG	EBI-20088907	two hybrid array
EIF2S3	HLA-B	EBI-1080036	anti bait coimmunoprecipitation
EIF3E	NSF	EBI-735241	two hybrid pooling approach
EIF3F	HLA-B	EBI-1077699	anti bait coimmunoprecipitation
EIF3H	HLA-B	EBI-1083995	anti bait coimmunoprecipitation
EIF3I	HLA-B	EBI-1074777	anti bait coimmunoprecipitation
EIF3L	HLA-C	EBI-1072658	anti bait coimmunoprecipitation
EIF4A1	EIF4H	EBI-2267859	molecular sieving
EIF4A2	GNG12	EBI-1084512	anti bait coimmunoprecipitation
EIF4E	CYFIP1	EBI-2000653	pull down
EIF4ENIF1	DDX6	EBI-10519566	validated two hybrid
EIF4H	PCNA	EBI-21237916	bimolecular fluorescence complementation
EIF4H	IKBKE	EBI-1075879	anti bait coimmunoprecipitation
EIF4H	EIF1B	EBI-1065818	anti bait coimmunoprecipitation
EIF4H	LNX1	EBI-10593404	validated two hybrid
EIF5B	ANXA5	EBI-11902408	inference by socio-affinity scoring
EIPR1	EXOC4	EBI-11916052	inference by socio-affinity scoring
ELOVL4	SFT2D2	EBI-19910872	two hybrid array
ELP1	CCT5	EBI-729717	two hybrid pooling approach
EMP3	RAP2A	EBI-21195511	bimolecular fluorescence complementation
EMP3	FLOT1	EBI-21195506	bimolecular fluorescence complementation
EMP3	CLDN7	EBI-19347418	two hybrid prey pooling approach
ENO1	FHL1	EBI-5657889	two hybrid fragment pooling approach
ENO1	TTN	EBI-5658257	two hybrid fragment pooling approach
EPHA2	EFNA1	EBI-2604252	anti tag coimmunoprecipitation
EPHA4	EFNA1	EBI-15810349	surface plasmon resonance
EPHA7	GNB1	EBI-3908632	two hybrid array
EPN1	FLVCR2	EBI-21901811	anti tag coimmunoprecipitation
EPN1	PICALM	EBI-21378837	two hybrid fragment pooling approach
EPN2	LITAF	EBI-19707968	two hybrid array
EPN2	PICALM	EBI-21374336	two hybrid fragment pooling approach
EPN3	LITAF	EBI-19521795	two hybrid prey pooling approach
EPPK1	PHB2	EBI-1061046	anti bait coimmunoprecipitation
ERAP1	CSNK1G2	EBI-20900463	cross-linking study
ERBB2	ANXA6	EBI-9064247	two hybrid array
ERBB2	RANBP2	EBI-4373207	anti bait coimmunoprecipitation
ERBB2	GAPDH	EBI-9687897	ubiquitin reconstruction
ERBB4	GAPDH	EBI-9687710	ubiquitin reconstruction
ERG28	NSF	EBI-729084	two hybrid pooling approach
ERG28	CLDN7	EBI-19347444	two hybrid prey pooling approach
ERGIC3	IGFBP5	EBI-18883774	two hybrid prey pooling approach
ERGIC3	FIS1	EBI-18884411	two hybrid prey pooling approach
ERGIC3	CD81	EBI-18884099	two hybrid prey pooling approach
ERGIC3	TF	EBI-18886486	two hybrid prey pooling approach
ERGIC3	VTI1B	EBI-18884229	two hybrid prey pooling approach
ERGIC3	STX12	EBI-18886655	two hybrid prey pooling approach
ERH	ATP6V0C	EBI-18790178	two hybrid array
ERMP1	CLDN9	EBI-19687371	two hybrid array
ERMP1	CLDN7	EBI-19348253	two hybrid prey pooling approach
ERP29	TTN	EBI-20900744	cross-linking study
ERP29	HLA-B	EBI-1083714	anti bait coimmunoprecipitation
ESD	HLA-B	EBI-1085169	anti bait coimmunoprecipitation
ESR1	PHB2	EBI-5325758	pull down
EVI2A	ATP6V0C	EBI-19081140	two hybrid prey pooling approach
EWSR1	NDRG1	EBI-1191085	anti bait coimmunoprecipitation
EWSR1	PHB2	EBI-1085161	anti bait coimmunoprecipitation
EXOC1	EXOC4	EBI-1106292	two hybrid
EXOC1	VTI1B	EBI-11934131	inference by socio-affinity scoring
EXOC4	DISC1	EBI-21385693	two hybrid fragment pooling approach
EXOC4	CEP63	EBI-21385718	two hybrid fragment pooling approach
EXOC4	BECN1	EBI-3509920	anti tag coimmunoprecipitation
EXOC4	NFKBIB	EBI-360981	tandem affinity purification
EXOC4	IQCB1	EBI-11925997	inference by socio-affinity scoring
EXOC4	RABEP1	EBI-11926006	inference by socio-affinity scoring
EXOC4	EXOC3	EBI-11925979	inference by socio-affinity scoring
EXOC4	VPS51	EBI-11926051	inference by socio-affinity scoring
EXOC4	RABEP2	EBI-11926033	inference by socio-affinity scoring
EXOC4	EXOC2	EBI-11926024	inference by socio-affinity scoring
EXOC4	EXOC6	EBI-11926015	inference by socio-affinity scoring
EXOC4	RALB	EBI-11925988	inference by socio-affinity scoring
EXOC4	EXOC7	EBI-11926060	inference by socio-affinity scoring
EXOC4	EXOC6B	EBI-11926069	inference by socio-affinity scoring
EXOC4	EGFR	EBI-10764367	anti bait coimmunoprecipitation
EXOC4	LAPTM4B	EBI-10764411	anti bait coimmunoprecipitation
EXOC4	WASHC1	EBI-6160438	anti bait coimmunoprecipitation
EXOC4	MYC	EBI-1063936	anti bait coimmunoprecipitation
EXOC5	RAB14	EBI-10218475	two hybrid prey pooling approach
EXOC5	NSF	EBI-11899563	inference by socio-affinity scoring
EXOC5	EXOC4	EBI-11899599	inference by socio-affinity scoring
EXOC6	APP	EBI-3385834	two hybrid array
EXOC8	EXOC4	EBI-11921785	inference by socio-affinity scoring
EXOSC4	HLA-B	EBI-1086070	anti bait coimmunoprecipitation
EYA4	PLEC	EBI-11914232	inference by socio-affinity scoring
EZR	CAPN1	EBI-7981895	protease assay
EZR	SLC9A3R1	EBI-528806	affinity chromatography technology
EZR	HLA-B	EBI-1081103	anti bait coimmunoprecipitation
EZR	WDR37	EBI-20910592	cross-linking study
EZR	ZSWIM2	EBI-20902192	cross-linking study
EZR	LRRC6	EBI-20936652	cross-linking study
EZR	SLC9A3R2	EBI-5658587	two hybrid fragment pooling approach
EZR	PIK3R1	EBI-7041892	pull down
EZR	IKBKE	EBI-1076541	anti bait coimmunoprecipitation
EZR	SGK1	EBI-1085607	anti bait coimmunoprecipitation
EZR	YWHAZ	EBI-7197540	pull down
EZR	PRKAB1	EBI-1077650	anti bait coimmunoprecipitation
EZR	TRAF6	EBI-1079077	anti bait coimmunoprecipitation
EZR	PTPRQ	EBI-11905850	inference by socio-affinity scoring
EZR	ERBB2	EBI-9690211	ubiquitin reconstruction
EZR	FADD	EBI-6595362	proximity ligation assay
EZR	HTT	EBI-9054224	two hybrid
EZR	PINX1	EBI-1069168	anti bait coimmunoprecipitation
EZR	RIPK2	EBI-1073710	anti bait coimmunoprecipitation
EZR	GABARAPL2	EBI-1065400	anti bait coimmunoprecipitation
EZR	MCC	EBI-1067033	anti bait coimmunoprecipitation
EZR	VHL	EBI-1060709	anti bait coimmunoprecipitation
EZR	MISP	EBI-19112375	two hybrid prey pooling approach
EZR	MPP3	EBI-3911517	two hybrid array
EZR	WFDC1	EBI-3920930	two hybrid array
F2	F2R	EBI-15683757	x-ray crystallography
F2	SERPINA5	EBI-15694731	x-ray crystallography
F2	DDIT3	EBI-3908123	two hybrid array
F2R	ATP13A2	EBI-6377409	ubiquitin reconstruction
F2RL1	CAPNS1	EBI-20806248	ubiquitin reconstruction
F2RL1	ATP2B1	EBI-20806208	ubiquitin reconstruction
F2RL1	CD81	EBI-20806333	ubiquitin reconstruction
F2RL1	CTNNA1	EBI-20806313	ubiquitin reconstruction
F5	OLR1	EBI-21849065	anti tag coimmunoprecipitation
F8	F2	EBI-15703124	protease assay
F9	SERPINC1	EBI-15828162	x-ray crystallography
FAM114A1	RAB2A	EBI-10374644	two hybrid array
FAM118B	GNB2	EBI-7147527	two hybrid
FAM163B	SCRIB	EBI-20731078	p8 filamentous phage display
FAM189B	SCRIB	EBI-11792243	phage display
FAM192A	ATP13A2	EBI-6377599	ubiquitin reconstruction
FAM209A	MYADM	EBI-19653180	two hybrid array
FAM209A	CLDN4	EBI-19651251	two hybrid array
FAM209A	SMIM1	EBI-19656346	two hybrid array
FAM209A	IGFBP5	EBI-19651121	two hybrid array
FAM209A	FIS1	EBI-19651786	two hybrid array
FAM209A	CD81	EBI-19651407	two hybrid array
FAM20C	KNG1	EBI-12593499	protein kinase assay
FAM20C	F5	EBI-12593764	protein kinase assay
FAM20C	CST3	EBI-12594159	protein kinase assay
FAM20C	ITIH2	EBI-12593629	protein kinase assay
FAM20C	SERPINC1	EBI-12594237	protein kinase assay
FAM20C	FBLN1	EBI-12594135	protein kinase assay
FAM20C	LTBP1	EBI-12594361	protein kinase assay
FAM20C	C3	EBI-12593723	protein kinase assay
FAM20C	SLC9A3R1	EBI-12592855	protein kinase assay
FAM20C	IGFBP5	EBI-13915377	protein kinase assay
FAM20C	APP	EBI-12594346	protein kinase assay
FAM210B	SMIM1	EBI-18949795	two hybrid prey pooling approach
FAM210B	STX7	EBI-18938609	two hybrid prey pooling approach
FAM210B	FIS1	EBI-18941028	two hybrid prey pooling approach
FAM210B	ATP6V0C	EBI-18942571	two hybrid prey pooling approach
FAM25C	PPIC	EBI-19643608	two hybrid array
FAM71C	RAB2A	EBI-10270660	two hybrid prey pooling approach
FAM71F2	RAB2A	EBI-19520682	two hybrid prey pooling approach
FAM72D	GOLGA7	EBI-20005389	two hybrid array
FANCC	NRAS	EBI-8999733	two hybrid array
FARSA	FARSB	EBI-19208828	two hybrid prey pooling approach
FASLG	LYN	EBI-2481502	phage display
FASN	NDRG1	EBI-1190841	anti bait coimmunoprecipitation
FASTKD5	SCRIB	EBI-20730882	p8 filamentous phage display
FAXDC2	CLDN7	EBI-19347842	two hybrid prey pooling approach
FBLN1	CACNA1A	EBI-3867043	two hybrid
FBLN1	MOB4	EBI-737435	two hybrid pooling approach
FBLN1	SKIL	EBI-7227739	two hybrid
FBLN1	SMAD4	EBI-7248636	two hybrid
FBLN1	GFI1B	EBI-952870	two hybrid
FBLN1	ATN1	EBI-950974	two hybrid
FBLN1	MPG	EBI-1081590	anti bait coimmunoprecipitation
FBLN1	EDC4	EBI-3937677	two hybrid
FBLN1	NEDD1	EBI-3942413	two hybrid
FBLN1	FN1	EBI-3929471	two hybrid
FBLN1	PLSCR1	EBI-3929501	two hybrid
FBLN1	LTBP4	EBI-3929521	two hybrid
FBLN1	SMAD3	EBI-3908840	two hybrid array
FBLN1	TDGF1	EBI-3908860	two hybrid array
FBLN1	BHLHE40	EBI-3908870	two hybrid array
FBN1	LTBP1	EBI-10960559	confocal microscopy
FBP1	ASL	EBI-3926579	two hybrid
FBP2	CTNNA1	EBI-8996846	two hybrid array
FBXO18	CACYBP	EBI-9371881	luminescence based mammalian interactome mapping
FBXO24	CACYBP	EBI-9360601	luminescence based mammalian interactome mapping
FBXO33	CUL1	EBI-8555443	anti tag coimmunoprecipitation
FBXW11	CUL1	EBI-6594894	proximity ligation assay
FBXW2	CACYBP	EBI-9387847	luminescence based mammalian interactome mapping
FBXW2	CUL1	EBI-8107922	anti tag coimmunoprecipitation
FBXW4	CUL1	EBI-7058548	coimmunoprecipitation
FBXW5	CUL1	EBI-7058563	coimmunoprecipitation
FBXW7	CUL1	EBI-7058578	coimmunoprecipitation
FCGR1A	VTI1B	EBI-19081433	two hybrid prey pooling approach
FCGR2B	LYN	EBI-7044322	pull down
FCHO1	DDX6	EBI-19491578	two hybrid prey pooling approach
FDFT1	ANXA5	EBI-733819	two hybrid pooling approach
FES	EZR	EBI-7702301	pull down
FEZF2	APP	EBI-21383106	two hybrid fragment pooling approach
FFAR2	CLDN4	EBI-19504922	two hybrid prey pooling approach
FFAR2	ATP6V0C	EBI-19505221	two hybrid prey pooling approach
FGA	F2	EBI-6590021	proximity ligation assay
FGD5	PLEC	EBI-20938692	cross-linking study
FGD5	PHB2	EBI-20932312	cross-linking study
FGFR2	CTDSP1	EBI-20981298	ubiquitin reconstruction
FHL1	TXNIP	EBI-7150421	two hybrid
FHL1	IGFBP5	EBI-5658741	two hybrid fragment pooling approach
FHL1	APP	EBI-21373930	two hybrid fragment pooling approach
FHL1	HLA-B	EBI-1077829	anti bait coimmunoprecipitation
FHL1	BIN1	EBI-21373918	two hybrid fragment pooling approach
FHL1	DOCK9	EBI-5656452	two hybrid fragment pooling approach
FHL1	CLMN	EBI-5658702	two hybrid fragment pooling approach
FHL1	MACF1	EBI-5658777	two hybrid fragment pooling approach
FHL1	PAX7	EBI-5658830	two hybrid fragment pooling approach
FHL1	EPB41	EBI-1080530	anti bait coimmunoprecipitation
FHL1	PRKAB1	EBI-1076299	anti bait coimmunoprecipitation
FHL1	IKBKE	EBI-1078808	anti bait coimmunoprecipitation
FHL1	AKAP12	EBI-7149971	two hybrid
FHL1	EED	EBI-7150269	two hybrid
FHL1	HES1	EBI-7150321	two hybrid
FHL1	PDE4DIP	EBI-7150371	two hybrid
FHL1	MCC	EBI-1068266	anti bait coimmunoprecipitation
FHL2	CAND2	EBI-19948065	two hybrid array
FHL2	GNG12	EBI-3937721	two hybrid
FHL2	PHB2	EBI-1640675	two hybrid
FHL3	HYAL2	EBI-10383556	two hybrid array
FIS1	APH1A	EBI-19290466	two hybrid prey pooling approach
FIS1	CREB3	EBI-8634440	two hybrid
FIS1	43895	EBI-8588373	anti tag coimmunoprecipitation
FIS1	UBC	EBI-8588345	anti tag coimmunoprecipitation
FIS1	EBP	EBI-19992330	two hybrid array
FIS1	JAGN1	EBI-19193150	two hybrid prey pooling approach
FKBP1A	TGFBR1	EBI-1027593	x-ray crystallography
FKBP2	RAP2A	EBI-2115302	two hybrid
FKBP3	HLA-B	EBI-1077029	anti bait coimmunoprecipitation
FKBP3	MCC	EBI-1072820	anti bait coimmunoprecipitation
FKBP3	TNIK	EBI-1062588	anti bait coimmunoprecipitation
FKBP4	YWHAZ	EBI-7198054	pull down
FKBP4	SH3BP4	EBI-2654041	two hybrid
FKBP4	HSP90AA1	EBI-7835107	pull down
FKBP4	GLMN	EBI-20075565	two hybrid array
FKBP8	ATP13A2	EBI-6377270	ubiquitin reconstruction
FKBPL	CYFIP1	EBI-9378414	luminescence based mammalian interactome mapping
FLAD1	CRABP2	EBI-19064929	two hybrid prey pooling approach
FLJ10324	LITAF	EBI-737033	two hybrid pooling approach
FLNA	APOH	EBI-21856781	anti tag coimmunoprecipitation
FLOT1	APP	EBI-2108262	anti bait coimmunoprecipitation
FLOT1	PCNA	EBI-21236713	bimolecular fluorescence complementation
FLOT1	GOLM1	EBI-736853	two hybrid pooling approach
FLOT1	FAM90A1	EBI-20155947	two hybrid array
FLOT1	BACE1	EBI-9213821	proximity ligation assay
FLOT1	BBS1	EBI-1995633	confocal microscopy
FLOT1	BBS4	EBI-1995678	confocal microscopy
FLOT1	BBS7	EBI-1995688	confocal microscopy
FLOT2	FLOT1	EBI-9514256	fluorescence microscopy
FLOT2	PSEN1	EBI-21139710	proximity ligation assay
FLOT2	KIF18B	EBI-20924714	cross-linking study
FLOT2	NKX2-5	EBI-20912358	cross-linking study
FLOT2	MVP	EBI-20913686	cross-linking study
FLOT2	CAV1	EBI-603661	anti bait coimmunoprecipitation
FLOT2	DXO	EBI-348724	two hybrid
FLOT2	BACE1	EBI-9213813	proximity ligation assay
FLOT2	LAMP3	EBI-9514300	fluorescence microscopy
FLOT2	SPATA24	EBI-3923528	two hybrid array
FLRT3	PHB2	EBI-1077253	anti bait coimmunoprecipitation
FMR1	CYFIP1	EBI-3649503	pull down
FNDC3B	TTN	EBI-5665808	two hybrid fragment pooling approach
FNTA	PTP4A2	EBI-1060514	anti bait coimmunoprecipitation
FNTB	PTP4A2	EBI-1084419	anti bait coimmunoprecipitation
FOS	CACYBP	EBI-2687497	display technology
FOS	APP	EBI-2695093	tandem affinity purification
FRAS1	TCP1	EBI-20903312	cross-linking study
FRMD1	RAB2A	EBI-18759821	two hybrid array
FRMPD1	SCRIB	EBI-20730915	p8 filamentous phage display
FRMPD4	SCRIB	EBI-20731063	p8 filamentous phage display
FRS3	VASP	EBI-10695468	two hybrid array
FSCN1	RAB1A	EBI-735542	two hybrid pooling approach
FSCN1	HLA-B	EBI-1077012	anti bait coimmunoprecipitation
FUNDC2	SLC16A10	EBI-19208322	two hybrid prey pooling approach
FUNDC2	ATP13A2	EBI-6377471	ubiquitin reconstruction
FUNDC2	NSF	EBI-732689	two hybrid pooling approach
FUS	PLEC	EBI-6898837	pull down
FUS	HLA-B	EBI-1085486	anti bait coimmunoprecipitation
FXYD3	FBXL12	EBI-734484	two hybrid pooling approach
FXYD3	NR4A1	EBI-735235	two hybrid pooling approach
FXYD3	NUDT3	EBI-7273806	two hybrid
FXYD6	SLC16A7	EBI-19608467	two hybrid array
FXYD6	APH1A	EBI-19291055	two hybrid prey pooling approach
FXYD6	CLDN7	EBI-19347933	two hybrid prey pooling approach
FYN	TGOLN2	EBI-1961559	peptide array
FZD4	SLC9A3R1	EBI-3504957	far western blotting
G3BP1	GAPDH	EBI-20929856	cross-linking study
G7	CACYBP	EBI-9388251	luminescence based mammalian interactome mapping
GAB1	LYN	EBI-9462576	fluorescence polarization spectroscopy
GABARAP	TTN	EBI-5665844	two hybrid fragment pooling approach
GABBR1	NSF	EBI-8530934	anti tag coimmunoprecipitation
GABBR2	NSF	EBI-8530904	imaging technique
GADD45A	MASP1	EBI-7153775	two hybrid
GADD45A	GAPDH	EBI-7152962	two hybrid
GAK	ATP13A2	EBI-6377690	anti tag coimmunoprecipitation
GALC	FBXO45	EBI-11909122	inference by socio-affinity scoring
GALT	NQO1	EBI-19788089	two hybrid array
GANAB	HLA-C	EBI-1071854	anti bait coimmunoprecipitation
GANAB	HLA-B	EBI-1075726	anti bait coimmunoprecipitation
GAP43	APP	EBI-21132557	anti bait coimmunoprecipitation
GAPDH	HSPB2	EBI-15487660	two hybrid
GAPDH	SOD1	EBI-20303881	anti bait coimmunoprecipitation
GAPDH	CCDC38	EBI-20925058	cross-linking study
GAPDH	SLC4A3	EBI-20926210	cross-linking study
GAPDH	CDK5	EBI-20926978	cross-linking study
GAPDH	LNP1	EBI-20927136	cross-linking study
GAPDH	SPAG6	EBI-20914552	cross-linking study
GAPDH	SVIL	EBI-20916064	cross-linking study
GAPDH	ZNF891	EBI-20937020	cross-linking study
GAPDH	NUP107	EBI-20910640	cross-linking study
GAPDH	SEC62	EBI-20911552	cross-linking study
GAPDH	CDCA2	EBI-20928976	cross-linking study
GAPDH	TSHZ3	EBI-20929960	cross-linking study
GAPDH	PHF19	EBI-20931832	cross-linking study
GAPDH	GPRC5A	EBI-20902056	cross-linking study
GAPDH	KRT39	EBI-20904168	cross-linking study
GAPDH	NEBL	EBI-20904328	cross-linking study
GAPDH	CDC73	EBI-20932880	cross-linking study
GAPDH	NDUFB6	EBI-20934708	cross-linking study
GAPDH	ZNF646	EBI-20935244	cross-linking study
GAPDH	ZNF92	EBI-20906200	cross-linking study
GAPDH	H2AC4	EBI-20906576	cross-linking study
GAPDH	CROCC	EBI-20909272	cross-linking study
GAPDH	OBSCN	EBI-20920604	cross-linking study
GAPDH	VAPB	EBI-21993601	pull down
GAPDH	ITGB5	EBI-5659917	two hybrid fragment pooling approach
GAPDH	PCNA	EBI-8303378	fluorescence microscopy
GAPDH	PSEN1	EBI-3385373	two hybrid
GAPDH	MAP3K3	EBI-362433	tandem affinity purification
GAPDH	MAP3K14	EBI-363130	tandem affinity purification
GAPDH	RIPK2	EBI-363706	tandem affinity purification
GAPDH	TBK1	EBI-364297	tandem affinity purification
GAPDH	TNFRSF1B	EBI-364783	tandem affinity purification
GAPDH	ARL15	EBI-728720	two hybrid pooling approach
GAPDH	BTBD2	EBI-728775	two hybrid pooling approach
GAPDH	LAMA4	EBI-729012	two hybrid pooling approach
GAPDH	PAFAH1B3	EBI-729096	two hybrid pooling approach
GAPDH	PCDHA4	EBI-729117	two hybrid pooling approach
GAPDH	PSMD11	EBI-729159	two hybrid pooling approach
GAPDH	SERPINB9	EBI-729279	two hybrid pooling approach
GAPDH	LAMTOR5	EBI-730105	two hybrid pooling approach
GAPDH	PRDX1	EBI-730582	two hybrid pooling approach
GAPDH	TRAF1	EBI-365002	tandem affinity purification
GAPDH	REL	EBI-360834	tandem affinity purification
GAPDH	SGK1	EBI-1075257	anti bait coimmunoprecipitation
GAPDH	TXN	EBI-1082213	anti bait coimmunoprecipitation
GAPDH	EGFR	EBI-9687718	ubiquitin reconstruction
GAPDH	HTT	EBI-9053301	two hybrid
GAPDH	ANXA1	EBI-7095327	two hybrid
GAPDH	ANXA7	EBI-7098273	two hybrid
GAPDH	BID	EBI-7104540	two hybrid
GAPDH	KARS1	EBI-7157574	two hybrid
GAPDH	NFYC	EBI-7157626	two hybrid
GAPDH	OSTF1	EBI-7157808	two hybrid
GAPDH	TK1	EBI-7398156	two hybrid
GAPDH	EIF1B	EBI-1072279	anti bait coimmunoprecipitation
GAPDH	TERF1	EBI-11310274	bimolecular fluorescence complementation
GAPDH	TINF2	EBI-11310284	bimolecular fluorescence complementation
GAPDH	ACD	EBI-11310294	bimolecular fluorescence complementation
GAPDH	POT1	EBI-11310304	bimolecular fluorescence complementation
GAPDHS	ZP2	EBI-21273134	far western blotting
GAPDHS	ZP3	EBI-21273218	far western blotting
GAPDHS	ZP4	EBI-21273259	far western blotting
GAPDHS	SH3BP4	EBI-2654061	two hybrid
GAPDHS	DARS2	EBI-21691068	anti tag coimmunoprecipitation
GAPDHS	MFSD5	EBI-21690939	anti tag coimmunoprecipitation
GAPDHS	MEIOB	EBI-21691910	anti tag coimmunoprecipitation
GAPDHS	CTH	EBI-21690109	anti tag coimmunoprecipitation
GAPDHS	SLC5A2	EBI-21689998	anti tag coimmunoprecipitation
GAPDHS	PTPN20	EBI-21690790	anti tag coimmunoprecipitation
GAPDHS	HYAL4	EBI-21690769	anti tag coimmunoprecipitation
GAPDHS	GPX8	EBI-21691438	anti tag coimmunoprecipitation
GAPDHS	C12orf50	EBI-21691398	anti tag coimmunoprecipitation
GAPDHS	CCDC50	EBI-21691329	anti tag coimmunoprecipitation
GAPDHS	NTHL1	EBI-1072172	anti bait coimmunoprecipitation
GAREM1	EFNA1	EBI-21899974	anti tag coimmunoprecipitation
GARS1	HLA-B	EBI-1085779	anti bait coimmunoprecipitation
GAS7	CYFIP1	EBI-7721151	pull down
GAS7	GAPDH	EBI-7720940	pull down
GAST	TF	EBI-7153011	cross-linking study
GATA1	ATP6V0D1	EBI-11772852	barcode fusion genetics two hybrid
GBA	RAB21	EBI-11904855	inference by socio-affinity scoring
GBA	RAB14	EBI-11904846	inference by socio-affinity scoring
GC	PIK3R3	EBI-2115213	two hybrid
GC	GRB2	EBI-2116053	two hybrid
GC	CCND3	EBI-3926619	two hybrid
GDF15	CBX3	EBI-18783250	two hybrid array
GDF15	HOXA1	EBI-18783224	two hybrid array
GDF15	MAPK14	EBI-2116889	two hybrid
GDI1	RAB1A	EBI-7632665	pull down
GDI1	HLA-B	EBI-1078947	anti bait coimmunoprecipitation
GFPT1	HLA-B	EBI-1083222	anti bait coimmunoprecipitation
GGA3	TGOLN2	EBI-6971507	imaging technique
GIMAP5	CLDN7	EBI-19348067	two hybrid prey pooling approach
GIMAP5	STX4	EBI-10285506	two hybrid prey pooling approach
GINM1	FATE1	EBI-19847432	two hybrid array
GIPC1	SDC4	EBI-7356782	anti bait coimmunoprecipitation
GJA5	IGFBP5	EBI-18870538	two hybrid array
GJB5	IGFBP5	EBI-18748751	two hybrid array
GLB1	CTSA	EBI-11905886	inference by socio-affinity scoring
GLG1	NFKB2	EBI-365422	tandem affinity purification
GLIPR2	BECN1	EBI-16034773	anti tag coimmunoprecipitation
GLIS2	CPSF1	EBI-7251537	two hybrid pooling approach
GLRX5	HLA-B	EBI-1076533	anti bait coimmunoprecipitation
GLUL	HLA-B	EBI-1084540	anti bait coimmunoprecipitation
GMPS	HLA-C	EBI-1072122	anti bait coimmunoprecipitation
GMPS	HLA-B	EBI-1083598	anti bait coimmunoprecipitation
GNA13	CACYBP	EBI-9370167	luminescence based mammalian interactome mapping
GNA14	JMJD6	EBI-8469353	two hybrid
GNA14	DNAL4	EBI-10510034	validated two hybrid
GNA15	CACYBP	EBI-9364928	luminescence based mammalian interactome mapping
GNAO1	APP	EBI-8839204	anti bait coimmunoprecipitation
GNAQ	PARP2	EBI-7055495	protein array
GNAQ	IQSEC1	EBI-11896560	anti bait coimmunoprecipitation
GNAQ	RARA	EBI-6259147	proximity ligation assay
GNAQ	AGTR1	EBI-7409738	anti tag coimmunoprecipitation
GNAQ	PECAM1	EBI-9984652	anti tag coimmunoprecipitation
GNAQ	LUM	EBI-3909602	two hybrid array
GNAQ	ADHFE1	EBI-3923179	two hybrid array
GNAQ	NT5C3A	EBI-3918371	two hybrid array
GNAS	CHEK2	EBI-9064169	two hybrid array
GNAS	RIC8B	EBI-21877435	anti tag coimmunoprecipitation
GNAS	ACAT2	EBI-1072305	anti bait coimmunoprecipitation
GNAS	FSCN1	EBI-1070238	anti bait coimmunoprecipitation
GNB1	CYFIP1	EBI-3917485	two hybrid array
GNB1	MAP3K3	EBI-362247	tandem affinity purification
GNB1	RIPK3	EBI-363832	tandem affinity purification
GNB1	PSMD2	EBI-9367678	luminescence based mammalian interactome mapping
GNB1	NUDCD3	EBI-9367659	luminescence based mammalian interactome mapping
GNB1	STIP1	EBI-9367722	luminescence based mammalian interactome mapping
GNB1	AARSD1	EBI-9367760	luminescence based mammalian interactome mapping
GNB1	PFDN5	EBI-9367741	luminescence based mammalian interactome mapping
GNB1	GNAI2	EBI-8553074	anti tag coimmunoprecipitation
GNB1	MCC	EBI-1061755	anti bait coimmunoprecipitation
GNB1	AFP	EBI-3904906	two hybrid array
GNB2	MAP3K3	EBI-362076	tandem affinity purification
GNB2	RIPK3	EBI-363730	tandem affinity purification
GNB2	TRAF6	EBI-1079942	anti bait coimmunoprecipitation
GNB2	IKBKE	EBI-1074963	anti bait coimmunoprecipitation
GNB2	TFAP2A	EBI-9679115	two hybrid
GNB2	ANXA7	EBI-7098405	two hybrid
GNB2	CDKN1A	EBI-7123717	two hybrid
GNB2	GADD45A	EBI-7153265	two hybrid
GNB2	STAT5A	EBI-7392908	two hybrid
GNB2	ACSF2	EBI-21877340	anti tag coimmunoprecipitation
GNB2	FMO2	EBI-21877353	anti tag coimmunoprecipitation
GNB2	PDHB	EBI-3909631	two hybrid array
GNB3	ZNF131	EBI-21851914	anti tag coimmunoprecipitation
GNB3	SLC36A3	EBI-21851934	anti tag coimmunoprecipitation
GNG2	GNB1	EBI-16060136	pull down
GNG5	GNB1	EBI-10489232	mammalian protein protein interaction trap
GNPAT	RAB35	EBI-737495	two hybrid pooling approach
GOLGA2	UBE3C	EBI-10392052	two hybrid array
GOLGA2	RAB39B	EBI-10284528	two hybrid prey pooling approach
GOLGA2	RAB2A	EBI-10218093	two hybrid prey pooling approach
GOLGA7	KCNIP2	EBI-20005311	two hybrid array
GOLGA7	KCNIP4	EBI-20005337	two hybrid array
GOLGA7	NCALD	EBI-20005363	two hybrid array
GOLGA7	MID2	EBI-19315279	two hybrid prey pooling approach
GOLGA7	ACTN2	EBI-12721340	validated two hybrid
GOLM1	CLDN4	EBI-20060160	two hybrid array
GOLM1	IGFBP5	EBI-20060100	two hybrid array
GORAB	STX12	EBI-19173052	two hybrid prey pooling approach
GOSR2	STX4	EBI-10181290	two hybrid prey pooling approach
GOT1	HLA-B	EBI-1080181	anti bait coimmunoprecipitation
GOT2	GAPDH	EBI-7157215	two hybrid
GOT2	HLA-C	EBI-1071946	anti bait coimmunoprecipitation
GOT2	HLA-B	EBI-1076062	anti bait coimmunoprecipitation
GP6	LYN	EBI-515432	anti bait coimmunoprecipitation
GPATCH8	APH1A	EBI-3942826	two hybrid
GPC4	PICK1	EBI-19755054	two hybrid array
GPC6	APP	EBI-15482638	surface plasmon resonance array
GPI	ANXA5	EBI-11905055	inference by socio-affinity scoring
GPM6B	EGFR	EBI-4397337	ubiquitin reconstruction
GPM6B	SLC6A4	EBI-6116134	two hybrid
GPM6B	MTNR1B	EBI-11576387	ubiquitin reconstruction
GPR152	SFT2D2	EBI-19556856	two hybrid prey pooling approach
GPR152	IGFBP5	EBI-19553792	two hybrid prey pooling approach
GPR152	CD81	EBI-19554156	two hybrid prey pooling approach
GPR152	ATP6V0C	EBI-19554611	two hybrid prey pooling approach
GPR182	HLA-C	EBI-20801210	ubiquitin reconstruction
GPR25	SLC16A7	EBI-19609231	two hybrid array
GPR25	ATP6V0C	EBI-18790230	two hybrid array
GPR35	APH1A	EBI-20807226	ubiquitin reconstruction
GPR35	CD81	EBI-20807296	ubiquitin reconstruction
GPR35	SLC2A1	EBI-20807638	ubiquitin reconstruction
GPR35	VTI1B	EBI-20807825	ubiquitin reconstruction
GPR35	ATP1A1	EBI-20807246	ubiquitin reconstruction
GPR37	TMEM231	EBI-20808101	ubiquitin reconstruction
GPR37	HLA-C	EBI-20808271	ubiquitin reconstruction
GPR37L1	PRCP	EBI-2927633	protease assay
GPRC5D	IGFBP5	EBI-19520976	two hybrid prey pooling approach
GPS1	SCRIB	EBI-20730981	p8 filamentous phage display
GPX8	TF	EBI-19224397	two hybrid prey pooling approach
GRB14	NRAS	EBI-15796224	anti tag coimmunoprecipitation
GRB2	APOH	EBI-2115672	two hybrid
GRB2	TGOLN2	EBI-1963191	peptide array
GRB2	RAB11A	EBI-10705533	peptide array
GRB7	GNB2	EBI-7160608	two hybrid
GREB1	BCAR3	EBI-9066249	two hybrid array
GREB1	CASP8	EBI-9066665	two hybrid array
GREB1	CDKN2C	EBI-9067134	two hybrid array
GREB1	SMAD4	EBI-9070566	two hybrid array
GREB1	TGFB1	EBI-9070891	two hybrid array
GREB1	XRCC3	EBI-9071307	two hybrid array
GRIA2	NSF	EBI-8530829	pull down
GRIN2B	SCRIB	EBI-20730867	p8 filamentous phage display
GRPEL1	HLA-B	EBI-1079028	anti bait coimmunoprecipitation
GSK3B	GNB2	EBI-7165519	two hybrid
GSK3B	GAPDH	EBI-7165309	two hybrid
GSN	AR	EBI-15792620	t7 phage display
GSN	EGFR	EBI-5235004	ubiquitin reconstruction
GSN	CASP4	EBI-1080436	anti bait coimmunoprecipitation
GSN	PPM1B	EBI-1082397	anti bait coimmunoprecipitation
GSN	EIF3K	EBI-11904956	inference by socio-affinity scoring
GSN	SESTD1	EBI-11904947	inference by socio-affinity scoring
GSN	PFN2	EBI-11904938	inference by socio-affinity scoring
GSN	DNALI1	EBI-11904929	inference by socio-affinity scoring
GSN	ACTA1	EBI-15635332	classical fluorescence spectroscopy
GSN	ARRB1	EBI-1643145	anti tag coimmunoprecipitation
GSN	ARRB2	EBI-1643257	anti tag coimmunoprecipitation
GSPT1	HLA-B	EBI-1085628	anti bait coimmunoprecipitation
GSS	GAPDH	EBI-7830840	anti bait coimmunoprecipitation
GSTM3	HLA-C	EBI-1064590	anti bait coimmunoprecipitation
GTF2F2	TF	EBI-2683947	display technology
GTF2F2	ATP1A1	EBI-2686829	display technology
GTF3A	APP	EBI-21378784	two hybrid fragment pooling approach
GUCY1A2	SCRIB	EBI-11794995	fluorescence microscopy
H1-1	PRLR	EBI-20913286	cross-linking study
H1-1	SCN4A	EBI-20921356	cross-linking study
H1-1	PPIAL4C	EBI-20913430	cross-linking study
H1-1	HMGN2	EBI-20900904	cross-linking study
H1-1	DDX6	EBI-20920716	cross-linking study
H1-2	GALC	EBI-20920692	cross-linking study
H1-2	ATP2B1	EBI-20919492	cross-linking study
H1-2	TTN	EBI-20923418	cross-linking study
H1-5	SCN4A	EBI-20921340	cross-linking study
H1-5	MYH14	EBI-20930344	cross-linking study
H1-5	ATP2B1	EBI-20919500	cross-linking study
H1-5	TTN	EBI-20938452	cross-linking study
H2AC4	ATP2B1	EBI-20919508	cross-linking study
H2AC4	TTN	EBI-20935516	cross-linking study
H2AC4	HLA-B	EBI-20932728	cross-linking study
H2AFX	MASP1	EBI-7172818	two hybrid
H2BFS	HMGN2	EBI-20912310	cross-linking study
H2BFS	TTN	EBI-20927424	cross-linking study
H4-16	SUCO	EBI-20930432	cross-linking study
HADHA	HLA-B	EBI-1082993	anti bait coimmunoprecipitation
HAX1	XPO1	EBI-8162190	anti tag coimmunoprecipitation
HBA1	HLA-B	EBI-1077515	anti bait coimmunoprecipitation
HBA1	PTEN	EBI-733016	two hybrid pooling approach
HBA1	NAP1L1	EBI-737222	two hybrid pooling approach
HBA1	ATP6AP1	EBI-731341	two hybrid pooling approach
HBA1	UBE3A	EBI-7413112	two hybrid
HBA1	HBQ1	EBI-20013106	two hybrid array
HBA1	HBD	EBI-20013132	two hybrid array
HBA1	KRT34	EBI-19240949	two hybrid prey pooling approach
HBA1	DAXX	EBI-3928663	two hybrid
HBB	HBZ	EBI-22144391	two hybrid array
HBB	HBA1	EBI-20013051	two hybrid array
HBD	HBZ	EBI-10510798	validated two hybrid
HBE1	HBA1	EBI-20012939	two hybrid array
HBG2	HBA1	EBI-20013079	two hybrid array
HBZ	GOLGA6L9	EBI-20125219	two hybrid array
HBZ	KHDRBS3	EBI-20087788	two hybrid array
HBZ	RBMY1A1	EBI-19346583	two hybrid prey pooling approach
HBZ	KRT31	EBI-19530618	two hybrid prey pooling approach
HBZ	CARD10	EBI-19411348	two hybrid prey pooling approach
HBZ	HBM	EBI-19005526	two hybrid prey pooling approach
HBZ	WDYHV1	EBI-19005448	two hybrid prey pooling approach
HBZ	CCNDBP1	EBI-19050073	two hybrid prey pooling approach
HBZ	HBQ1	EBI-19230578	two hybrid prey pooling approach
HBZ	CYSRT1	EBI-19257804	two hybrid prey pooling approach
HBZ	FGFR3	EBI-734505	two hybrid pooling approach
HBZ	HBE1	EBI-9207586	affinity chromatography technology
HCCS	RAB21	EBI-11909095	inference by socio-affinity scoring
HCCS	RAB14	EBI-11909050	inference by socio-affinity scoring
HCCS	RAB2A	EBI-11909041	inference by socio-affinity scoring
HCK	MDK	EBI-18916994	two hybrid prey pooling approach
HDAC6	ATP13A2	EBI-6309194	anti tag coimmunoprecipitation
HDAC6	CACYBP	EBI-9387417	luminescence based mammalian interactome mapping
HDAC7	GNG12	EBI-18847243	two hybrid array
HEATR5B	SCRIB	EBI-20731245	p8 filamentous phage display
HECW2	HNRNPD	EBI-20933652	cross-linking study
HEMGN	NRAS	EBI-8999772	two hybrid array
HES1	GAPDH	EBI-7157494	two hybrid
HES6	RAB2A	EBI-18759743	two hybrid array
HFE	TF	EBI-8062872	fluorescence microscopy
HFE	B2M	EBI-10051276	anti bait coimmunoprecipitation
HGD	CLDN7	EBI-3907765	two hybrid array
HGS	RAB14	EBI-6962748	imaging technique
HGS	LITAF	EBI-10294728	two hybrid prey pooling approach
HHIP	SHH	EBI-11667924	bio-layer interferometry
HIKESHI	PHB	EBI-21889312	anti tag coimmunoprecipitation
HINT1	HLA-B	EBI-1081900	anti bait coimmunoprecipitation
HIP1	LITAF	EBI-19538202	two hybrid prey pooling approach
HIP1	CLTCL1	EBI-7937347	imaging technique
HIST1H2BH	HMGN2	EBI-20912318	cross-linking study
HIST1H2BH	LSR	EBI-20920652	cross-linking study
HIST1H2BH	TTN	EBI-20923458	cross-linking study
HIST2H2BE	DDX60L	EBI-20923786	cross-linking study
HIST2H2BE	NAA16	EBI-20927480	cross-linking study
HIST2H2BE	HMGN2	EBI-20912326	cross-linking study
HIST2H2BE	TTN	EBI-20915872	cross-linking study
HIST2H2BF	TTN	EBI-20937236	cross-linking study
HIST3H3	PLEC	EBI-20919060	cross-linking study
HIVEP1	RAB1A	EBI-735545	two hybrid pooling approach
HLA-A	HLA-C	EBI-1067268	anti bait coimmunoprecipitation
HLA-B	HLA-C	EBI-1062857	anti bait coimmunoprecipitation
HLA-B	KIR3DL1	EBI-15323387	surface plasmon resonance
HLA-B	KIR3DS1	EBI-15480379	surface plasmon resonance
HLA-B	LILRB2	EBI-15480796	surface plasmon resonance
HLA-B	ATF7IP	EBI-7245418	two hybrid
HLA-B	COPS3	EBI-1080833	anti bait coimmunoprecipitation
HLA-B	CLIC1	EBI-1081273	anti bait coimmunoprecipitation
HLA-B	RANGAP1	EBI-1074789	anti bait coimmunoprecipitation
HLA-B	CYB5B	EBI-1076037	anti bait coimmunoprecipitation
HLA-B	HLA-A	EBI-1076867	anti bait coimmunoprecipitation
HLA-B	EIF3D	EBI-1077257	anti bait coimmunoprecipitation
HLA-B	PGRMC1	EBI-1077261	anti bait coimmunoprecipitation
HLA-B	RPL3	EBI-1078206	anti bait coimmunoprecipitation
HLA-B	USP14	EBI-1081757	anti bait coimmunoprecipitation
HLA-B	NAP1L1	EBI-1083140	anti bait coimmunoprecipitation
HLA-B	NUTF2	EBI-1084678	anti bait coimmunoprecipitation
HLA-B	KIR2DS4	EBI-13917518	affinity chromatography technology
HLA-B	TAPBPL	EBI-13955330	anti bait coimmunoprecipitation
HLA-C	B2M	EBI-7065745	x-ray crystallography
HLA-C	KIR3DS1	EBI-15480452	surface plasmon resonance
HLA-C	DISC1	EBI-21379023	two hybrid fragment pooling approach
HLA-C	KIR2DS4	EBI-13917559	affinity chromatography technology
HLA-C	KIR2DL2	EBI-13941623	affinity chromatography technology
HLA-C	LILRB2	EBI-15607435	surface plasmon resonance
HLA-C	EIF3F	EBI-1069768	anti bait coimmunoprecipitation
HLA-C	TRIM28	EBI-1071047	anti bait coimmunoprecipitation
HLA-C	CDC25A	EBI-3905399	two hybrid array
HLA-C	YBX1	EBI-3910219	two hybrid array
HLA-C	BATF2	EBI-3922951	two hybrid array
HLA-C	TANK	EBI-3914161	two hybrid array
HLA-C	PRRG4	EBI-3918747	two hybrid array
HLA-DPA1	TMEM50A	EBI-18890160	two hybrid prey pooling approach
HMGA1	TTN	EBI-20926474	cross-linking study
HMGN2	PPIAL4C	EBI-20913438	cross-linking study
HMGN2	H1-4	EBI-20922728	cross-linking study
HMGN2	SUN2	EBI-20922938	cross-linking study
HMGN2	HERC1	EBI-20922922	cross-linking study
HMGN2	HIST1H2AH	EBI-20923050	cross-linking study
HMGN2	MYO5C	EBI-20923450	cross-linking study
HMGN2	TBC1D4	EBI-20923826	cross-linking study
HMGN2	NEK11	EBI-20925490	cross-linking study
HMGN2	RPF2	EBI-20925218	cross-linking study
HMGN2	CAST	EBI-20925738	cross-linking study
HMGN2	HIST2H3D	EBI-20927118	cross-linking study
HMGN2	MEGF10	EBI-20914944	cross-linking study
HMGN2	SYNE1	EBI-20914784	cross-linking study
HMGN2	ITGB6	EBI-20916272	cross-linking study
HMGN2	H4-16	EBI-20916808	cross-linking study
HMGN2	H2AC4	EBI-20917384	cross-linking study
HMGN2	MYL2	EBI-20901176	cross-linking study
HMGN2	RPS8	EBI-20937516	cross-linking study
HMGN2	UTRN	EBI-20911512	cross-linking study
HMGN2	DDX52	EBI-20912542	cross-linking study
HMGN2	TPPP	EBI-20913126	cross-linking study
HMGN2	RABEP1	EBI-20913342	cross-linking study
HMGN2	FLYWCH1	EBI-20913924	cross-linking study
HMGN2	HIST2H2BF	EBI-20914204	cross-linking study
HMGN2	CBX3	EBI-20914640	cross-linking study
HMGN2	ATXN7L1	EBI-20928264	cross-linking study
HMGN2	SLU7	EBI-20929600	cross-linking study
HMGN2	SVIL	EBI-20931464	cross-linking study
HMGN2	PDCD11	EBI-20932128	cross-linking study
HMGN2	TWF2	EBI-20901080	cross-linking study
HMGN2	RPL23A	EBI-20901168	cross-linking study
HMGN2	MXRA5	EBI-20901544	cross-linking study
HMGN2	SHOC2	EBI-20903560	cross-linking study
HMGN2	AIDA	EBI-20904112	cross-linking study
HMGN2	H1-5	EBI-20904832	cross-linking study
HMGN2	ARHGAP27	EBI-20904640	cross-linking study
HMGN2	HSPA7	EBI-20932912	cross-linking study
HMGN2	HNF4G	EBI-20933324	cross-linking study
HMGN2	RHOXF2	EBI-20936132	cross-linking study
HMGN2	GRAMD1A	EBI-20936388	cross-linking study
HMGN2	OSER1	EBI-20936524	cross-linking study
HMGN2	SPATS1	EBI-20936604	cross-linking study
HMGN2	KCNK16	EBI-20905536	cross-linking study
HMGN2	STAC3	EBI-20905784	cross-linking study
HMGN2	UBAC1	EBI-20905808	cross-linking study
HMGN2	ASXL1	EBI-20906376	cross-linking study
HMGN2	ATPAF2	EBI-20907736	cross-linking study
HMGN2	ABCF1	EBI-20907640	cross-linking study
HMGN2	WNK1	EBI-20908208	cross-linking study
HMGN2	MON2	EBI-20908072	cross-linking study
HMGN2	CHD6	EBI-20909032	cross-linking study
HMGN2	PCF11	EBI-20909320	cross-linking study
HMGN2	ARHGAP4	EBI-20909632	cross-linking study
HMGN2	CAPG	EBI-20919484	cross-linking study
HMGN2	ALPK3	EBI-20919620	cross-linking study
HMGN2	PDCD4	EBI-20920364	cross-linking study
HMGN2	PHF8	EBI-20920532	cross-linking study
HMGN2	USF3	EBI-20921012	cross-linking study
HMGN2	RHOH	EBI-20921228	cross-linking study
HMGN2	TFIP11	EBI-20921500	cross-linking study
HMGN2	ANKRD31	EBI-20921684	cross-linking study
HMGN2	HIST3H3	EBI-20922358	cross-linking study
HMGN2	WDR49	EBI-20922456	cross-linking study
HMGN2	GRB2	EBI-1963715	peptide array
HMGN2	LRRK2	EBI-9659760	protein array
HMMR	GREB1	EBI-9068343	two hybrid array
HMOX1	SLC16A7	EBI-19608726	two hybrid array
HNRNPA1L2	TTN	EBI-20932808	cross-linking study
HNRNPA2B1	HNRNPD	EBI-20927664	cross-linking study
HNRNPA2B1	TTN	EBI-20932816	cross-linking study
HNRNPC	HNRNPD	EBI-7729223	two hybrid
HNRNPCL2	ANXA2	EBI-20920100	cross-linking study
HNRNPD	HSCB	EBI-15104156	two hybrid
HNRNPD	OR2AJ1	EBI-20926058	cross-linking study
HNRNPD	NCOA3	EBI-20914912	cross-linking study
HNRNPD	ANKRD12	EBI-20915240	cross-linking study
HNRNPD	HEBP2	EBI-20915800	cross-linking study
HNRNPD	HNRNPDL	EBI-20917216	cross-linking study
HNRNPD	GPATCH8	EBI-20937716	cross-linking study
HNRNPD	SPATA31E1	EBI-20928008	cross-linking study
HNRNPD	PDLIM1	EBI-20929144	cross-linking study
HNRNPD	HNRNPA1L2	EBI-20932200	cross-linking study
HNRNPD	ATRX	EBI-20902760	cross-linking study
HNRNPD	MAPT	EBI-20902768	cross-linking study
HNRNPD	SMC6	EBI-20932544	cross-linking study
HNRNPD	B4GAT1	EBI-20933040	cross-linking study
HNRNPD	EML5	EBI-20933708	cross-linking study
HNRNPD	MAP1B	EBI-20934156	cross-linking study
HNRNPD	NFE2L2	EBI-20934796	cross-linking study
HNRNPD	ACTR2	EBI-20936484	cross-linking study
HNRNPD	JAK1	EBI-20906048	cross-linking study
HNRNPD	C2CD6	EBI-20906136	cross-linking study
HNRNPD	ANKRD20A12P	EBI-20919892	cross-linking study
HNRNPD	SF3B4	EBI-7717007	two hybrid
HNRNPD	U2AF2	EBI-7719109	two hybrid
HNRNPD	HNRNPU	EBI-7751510	two hybrid
HNRNPD	HNRNPK	EBI-7752235	two hybrid
HNRNPD	MAPK6	EBI-7209624	two hybrid
HNRNPD	SF1	EBI-11300653	two hybrid fragment pooling approach
HNRNPDL	TTN	EBI-20923778	cross-linking study
HNRNPF	HNRNPD	EBI-7757650	two hybrid
HNRNPF	TTN	EBI-20931584	cross-linking study
HNRNPH3	HNRNPD	EBI-7757995	two hybrid
HNRNPK	HBZ	EBI-18783786	two hybrid array
HNRNPM	HLA-B	EBI-1083364	anti bait coimmunoprecipitation
HNRNPU	NAA16	EBI-20915000	cross-linking study
HOOK2	DDX6	EBI-18854530	two hybrid array
HPCAL1	LITAF	EBI-18958599	two hybrid prey pooling approach
HPRT1	ANXA5	EBI-11904648	inference by socio-affinity scoring
HPRT1	HLA-B	EBI-1079934	anti bait coimmunoprecipitation
HRAS	GREB1	EBI-9068434	two hybrid array
HRAS	RALA	EBI-8568544	pull down
HRH1	CD81	EBI-20808331	ubiquitin reconstruction
HSBP1	MPP7	EBI-20142623	two hybrid array
HSD17B10	APP	EBI-371735	enzyme linked immunosorbent assay
HSD17B11	SFT2D2	EBI-18950410	two hybrid prey pooling approach
HSD17B11	STX7	EBI-18949146	two hybrid prey pooling approach
HSD17B13	ATP6V0C	EBI-19401549	two hybrid prey pooling approach
HSD17B13	TF	EBI-19401826	two hybrid prey pooling approach
HSP90AA1	NDRG1	EBI-1190421	anti bait coimmunoprecipitation
HSP90AB1	FKBP4	EBI-9368059	luminescence based mammalian interactome mapping
HSP90AB1	LYN	EBI-6424409	luminescence based mammalian interactome mapping
HSP90AB1	PHB	EBI-2686109	display technology
HSP90B1	RAB8A	EBI-20901656	cross-linking study
HSPA4L	HLA-B	EBI-1081433	anti bait coimmunoprecipitation
HSPA5	NDRG1	EBI-1190439	anti bait coimmunoprecipitation
HSPA8	ATP13A2	EBI-6377665	anti tag coimmunoprecipitation
HSPA8	VASP	EBI-20915784	cross-linking study
HSPA9	GREB1	EBI-20937876	cross-linking study
HSPA9	XPO1	EBI-3931040	two hybrid
HSPB1	SPATA7	EBI-6872918	reverse ras recruitment system
HSPB1	RALA	EBI-6873584	reverse ras recruitment system
HSPB1	FKBP4	EBI-6870608	reverse ras recruitment system
HSPB1	SPTBN1	EBI-6873064	reverse ras recruitment system
HSPB1	XPO1	EBI-6871397	reverse ras recruitment system
HSPD1	PSMG1	EBI-20937868	cross-linking study
HSPD1	RANBP2	EBI-20901016	cross-linking study
HSPE1	TTN	EBI-20909648	cross-linking study
HSPE1	HLA-B	EBI-1074813	anti bait coimmunoprecipitation
HTR2C	SLC39A1	EBI-20801038	ubiquitin reconstruction
HTR2C	ATP6AP2	EBI-20800988	ubiquitin reconstruction
HTR2C	LIN7C	EBI-20812526	ubiquitin reconstruction
HTR2C	ATP6V0C	EBI-20800916	ubiquitin reconstruction
HTR2C	SCRIB	EBI-20730744	p8 filamentous phage display
HTR4	SLC39A1	EBI-20808897	ubiquitin reconstruction
HTR4	CD81	EBI-20808793	ubiquitin reconstruction
HYAL2	KRTAP6-2	EBI-19818106	two hybrid array
HYAL2	KRT34	EBI-19241161	two hybrid prey pooling approach
HYAL2	CYSRT1	EBI-19254569	two hybrid prey pooling approach
HYAL2	TRIM54	EBI-22027019	two hybrid prey pooling approach
IARS2	HLA-B	EBI-1083376	anti bait coimmunoprecipitation
ICA1	RAB2A	EBI-10374622	two hybrid array
ICAM3	CLDN4	EBI-19675505	two hybrid array
ICAM3	SMIM1	EBI-19675687	two hybrid array
IDH3B	RAB35	EBI-737498	two hybrid pooling approach
IDUA	MPP3	EBI-737171	two hybrid pooling approach
IFIT3	APP	EBI-3385569	two hybrid array
IFITM1	PROM1	EBI-21451700	ubiquitin reconstruction
IFITM1	MEP1B	EBI-20766040	ubiquitin reconstruction
IFITM1	ABHD16A	EBI-348757	two hybrid
IFT140	RANBP2	EBI-3450063	two hybrid pooling approach
IGBP1	S100A13	EBI-3910632	two hybrid array
IGF1	IGFBP4	EBI-15598534	molecular sieving
IGF1	IGFBP5	EBI-15533137	isothermal titration calorimetry
IGF2	DCN	EBI-9663701	enzyme linked immunosorbent assay
IGF2	CRELD2	EBI-7178830	two hybrid
IGF2	FAF1	EBI-7179080	two hybrid
IGF2	NMRK2	EBI-7179239	two hybrid
IGF2	IGF2R	EBI-7706995	surface plasmon resonance
IGF2	RBPMS	EBI-10510758	validated two hybrid
IGF2BP1	HLA-B	EBI-1076582	anti bait coimmunoprecipitation
IGF2R	TGOLN2	EBI-6971463	imaging technique
IGF2R	VPS35	EBI-9844653	two hybrid
IGFBP2	GSDMB	EBI-3939304	two hybrid
IGFBP4	IGF2	EBI-21315078	split luciferase complementation
IGFBP4	KDM1A	EBI-8471203	two hybrid
IGFBP5	APH1A	EBI-19289300	two hybrid prey pooling approach
IGFBP5	CLDN7	EBI-19347366	two hybrid prey pooling approach
IGFBP5	CLEC9A	EBI-19948465	two hybrid array
IGFBP5	KIAA2013	EBI-19924686	two hybrid array
IGFBP5	TMEM106C	EBI-20009887	two hybrid array
IGFBP5	TMEM237	EBI-19983218	two hybrid array
IGFBP5	GJA8	EBI-19803538	two hybrid array
IGFBP5	GPR151	EBI-19812065	two hybrid array
IGFBP5	CHODL	EBI-19790969	two hybrid array
IGFBP5	SLC13A4	EBI-19527664	two hybrid prey pooling approach
IGFBP5	FNDC9	EBI-19417143	two hybrid prey pooling approach
IGFBP5	PDZK1IP1	EBI-19355883	two hybrid prey pooling approach
IGFBP5	SLC41A2	EBI-19088678	two hybrid prey pooling approach
IGFBP5	MS4A7	EBI-19216232	two hybrid prey pooling approach
IGFBP5	AQP9	EBI-19216639	two hybrid prey pooling approach
IGFBP5	GPX8	EBI-19222829	two hybrid prey pooling approach
IGFBP5	RHCG	EBI-19226262	two hybrid prey pooling approach
IGFBP5	NAALADL2	EBI-19228473	two hybrid prey pooling approach
IGFBP5	ELOVL5	EBI-19298269	two hybrid prey pooling approach
IGFBP5	KCNK5	EBI-19111139	two hybrid prey pooling approach
IGFBP5	AQP2	EBI-19112889	two hybrid prey pooling approach
IGFBP5	GPR37L1	EBI-19124370	two hybrid prey pooling approach
IGFBP5	AMIGO1	EBI-19125469	two hybrid prey pooling approach
IGFBP5	CD53	EBI-19127261	two hybrid prey pooling approach
IGFBP5	ASGR1	EBI-19197907	two hybrid prey pooling approach
IGFBP5	TMEM179B	EBI-19250970	two hybrid prey pooling approach
IGFBP5	SYNE4	EBI-19268631	two hybrid prey pooling approach
IGFBP5	AHNAK2	EBI-19132556	two hybrid prey pooling approach
IGFBP5	TMPRSS2	EBI-19150767	two hybrid prey pooling approach
IGFBP5	PCNA	EBI-21237538	bimolecular fluorescence complementation
IGHG4	TF	EBI-11904702	inference by socio-affinity scoring
IGSF21	ANXA3	EBI-731185	two hybrid pooling approach
IHH	RHOD	EBI-3918629	two hybrid array
IK	DDX6	EBI-19349767	two hybrid prey pooling approach
IKZF1	DDX6	EBI-10361041	two hybrid array
IKZF3	ATP6V0D1	EBI-11766238	barcode fusion genetics two hybrid
IKZF3	RHOA	EBI-10375254	two hybrid array
IL13RA2	LGALS3	EBI-20263361	anti bait coimmunoprecipitation
IL1F10	IMPDH2	EBI-19358465	two hybrid prey pooling approach
IL7R	SDC4	EBI-19322787	two hybrid prey pooling approach
ILF3	NDRG1	EBI-1190503	anti bait coimmunoprecipitation
IMMT	CCT5	EBI-729720	two hybrid pooling approach
IMPDH1	IMPDH2	EBI-19668444	two hybrid array
IMPDH2	HLA-C	EBI-1074265	anti bait coimmunoprecipitation
IMPDH2	DISC1	EBI-21379694	two hybrid fragment pooling approach
IMPDH2	UBQLN4	EBI-950476	two hybrid
IMPDH2	IKBKE	EBI-1081377	anti bait coimmunoprecipitation
[truncated: 2,349 more rows]
