# Supplementary material for: Unraveling the surface glycoprotein interaction network by integrating chemical crosslinking with MS-based proteomics
Source: Royal Society of Chemistry journal article supplement (doi:10.1039/d0sc06327d), 2021-01-01
Supplement: d0sc06327d6.xlsx [file d0sc06327d6.xlsx]

## Sheet: Exp.#1
Table S5(a). Crosslinked peptides identified in Exp. #1
Peptide	Modifications	Proteins	Protein_Type	Precursor_Mass_Error(ppm)	Score
YHDIKR(5)-HKMDK(2)	Oxidation[M](12)	sp|O15020|SPTN2_HUMAN (500)-sp|O43520|AT8B1_HUMAN (168)/	Inter-Protein	-0.182611	0.208989
STWEKVNKYLDFSLFK(5)-KPTYDGGSK(1)	null	sp|O60669|MOT2_HUMAN (232)-sp|Q8WZ42|TITIN_HUMAN (23388)/	Inter-Protein	-5.1419	0.459863
LPVKWMAPEALFDR(4)-KLHMESKGNK(7)	Oxidation[M](6);Oxidation[M](21)	sp|P11362|FGFR1_HUMAN (665)-sp|Q6UWJ1|TMCO3_HUMAN (494)/sp|P21802|FGFR2_HUMAN (668)-sp|Q6UWJ1|TMCO3_HUMAN (494)/sp|P22455|FGFR4_HUMAN (654)-sp|Q6UWJ1|TMCO3_HUMAN (494)/sp|P22607|FGFR3_HUMAN (659)-sp|Q6UWJ1|TMCO3_HUMAN (494)/	Inter-Protein	-5.4925	0.375801
LNSSTIKYLDFVFAVK(7)-IQGEVETRKALEELR(9)	null	sp|P13473|LAMP2_HUMAN (280)-sp|O14524|NEMP1_HUMAN (357)/	Inter-Protein	0.039968	0.327781
LNSSTIKYLDFVFAVK(7)-IQGEVETRKALEELR(9)	null	sp|P13473|LAMP2_HUMAN (280)-sp|O14524|NEMP1_HUMAN (357)/	Inter-Protein	0.091392	0.46194
CWKFEHCNFNDVTTR(3)-MVIQKEK(5)	Carbamidomethyl[C](1);Carbamidomethyl[C](7);Oxidation[M](19)	sp|P13987|CD59_HUMAN (66)-sp|P14415|AT1B2_HUMAN (5)/	Inter-Protein	-7.54562	0.386835
GHMVGFKEDHYMLR(7)-HTIIPAKSPEKCR(7)	Oxidation[M](3);Carbamidomethyl[C](29)	sp|P16144|ITB4_HUMAN (758)-sp|Q9NZM1|MYOF_HUMAN (1914)/	Inter-Protein	-6.2507	0.397649
MLITILGTVKPNANR(10)-KKDDEVDRDAPSR(2)	Oxidation[M](1)	sp|P17931|LEG3_HUMAN (139)-sp|Q14643|ITPR1_HUMAN (1895)/	Inter-Protein	4.74741	0.445515
MKVIYPAVEGR(2)-EMMTKDR(5)	Oxidation[M](1);Oxidation[M](16)	sp|P21589|5NTD_HUMAN (536)-sp|Q14643|ITPR1_HUMAN (1694)/	Inter-Protein	0.200243	0.187715
GVIVDKDFSHPQMPK(6)-QALSCKMAVEYDR(6)	Oxidation[M](13);Carbamidomethyl[C](23)	sp|P48643|TCPE_HUMAN (232)-sp|Q8NES3|LFNG_HUMAN (180)/	Inter-Protein	0.043546	0.390115
NAKFYPVTR(3)-EKVNDQAK(2)	null	sp|P54851|EMP2_HUMAN (129)-sp|Q13740|CD166_HUMAN (521)/	Inter-Protein	-1.188	0.0552219
NAKFYPVTR(3)-EKVNDQAK(2)	null	sp|P54851|EMP2_HUMAN (129)-sp|Q13740|CD166_HUMAN (521)/	Inter-Protein	2.01327	0.252584
NAKFYPVTR(3)-EKVNDQAK(2)	null	sp|P54851|EMP2_HUMAN (129)-sp|Q13740|CD166_HUMAN (521)/	Inter-Protein	-2.30068	0.280657
NAKFYPVTR(3)-EKVNDQAK(2)	null	sp|P54851|EMP2_HUMAN (129)-sp|Q13740|CD166_HUMAN (521)/	Inter-Protein	-2.9767	0.286851
NAKFYPVTR(3)-EKVNDQAK(2)	null	sp|P54851|EMP2_HUMAN (129)-sp|Q13740|CD166_HUMAN (521)/	Inter-Protein	-3.1888	0.323168
NAKFYPVTR(3)-EKVNDQAK(2)	null	sp|P54851|EMP2_HUMAN (129)-sp|Q13740|CD166_HUMAN (521)/	Inter-Protein	1.4329	0.356097
MILGNKCDVNDK(6)-AGGPHTKMGGSR(7)	Carbamidomethyl[C](7);Oxidation[M](1);Oxidation[M](23)	sp|P61006|RAB8A_HUMAN (122)-sp|Q8TD84|DSCL1_HUMAN (2019)/	Inter-Protein	0.150844	0.241464
DHLKVMR(4)-QPYTK(1)	Oxidation[M](6)	sp|Q6NSJ5|LRC8E_HUMAN (487)-sp|Q8NGQ2|OR6Q1_HUMAN (2)/	Inter-Protein	-0.202621	0.367436
LMFQKNQQSKDSIFFR(5)-MLITILGTVKPNANR(10)	Oxidation[M](2)	sp|Q75V66|ANO5_HUMAN (63)-sp|P17931|LEG3_HUMAN (139)/	Inter-Protein	-0.422457	0.302144
LMFQKNQQSKDSIFFR(10)-MLITILGTVKPNANR(10)	Oxidation[M](2)	sp|Q75V66|ANO5_HUMAN (68)-sp|P17931|LEG3_HUMAN (139)/	Inter-Protein	-0.370765	0.251398
STAIR(1)-MAVAR(1)	null	sp|Q8WWZ7|ABCA5_HUMAN (2)-sp|Q9HCQ5|GALT9_HUMAN (1)/	Inter-Protein	1.30553	0.275831
IMDCVGCFKCR(9)-VTKLLK(3)	Carbamidomethyl[C](4);Carbamidomethyl[C](7);Carbamidomethyl[C](10);Oxidation[M](2)	sp|Q96HE7|ERO1A_HUMAN (396)-sp|Q8WZ42|TITIN_HUMAN (22545)/	Inter-Protein	-0.192595	0.176755
GLNLECLWEKARR(10)-GLAGEVGNKGAK(9)	Carbamidomethyl[C](6)	sp|Q96Q04|LMTK3_HUMAN (483)-sp|P12110|CO6A2_HUMAN (462)/	Inter-Protein	-6.60184	0.296126
MLKMLLK(3)-MNESR(1)	Oxidation[M](1);Oxidation[M](4)	sp|Q9C0K1|S39A8_HUMAN (217)-sp|Q9Y2T5|GPR52_HUMAN (1)/	Inter-Protein	3.23866	0.136407
MYDAER(1)-TPGKLK(4)	null	sp|Q9NST1|PLPL3_HUMAN (1)-sp|Q92824|PCSK5_HUMAN (587)/	Inter-Protein	-6.40592	0.0661136
MLSKEELPQRKMCLK(11)-QKALYR(2)	Carbamidomethyl[C](13);Oxidation[M](1)	sp|Q9UGF5|O14J1_HUMAN (312)-sp|O96005|CLPT1_HUMAN (182)/	Inter-Protein	0.436845	0.442912
EKELEAR(2)-KPAEAER(1)	null	sp|O75955|FLOT1_HUMAN (277)-sp|O75955|FLOT1_HUMAN (285)/	Intra-Protein	0.930489	0.315512
LVYLVENPGGYVAYSKAATVTGK(16)-DQHFVKIQVK(6)	null	sp|P02786|TFR1_HUMAN (224)-sp|P02786|TFR1_HUMAN (189)/	Intra-Protein	-0.329449	2.04777e-10
LVYLVENPGGYVAYSKAATVTGK(16)-DQHFVKIQVK(6)	null	sp|P02786|TFR1_HUMAN (224)-sp|P02786|TFR1_HUMAN (189)/	Intra-Protein	-0.561518	7.10192e-09
IISANGCKVDNSSLTGESEPQTR(8)-IVEIPFNSTNKYQLSIHK(11)	Carbamidomethyl[C](7)	sp|P05023|AT1A1_HUMAN (212)-sp|P05023|AT1A1_HUMAN (487)/	Intra-Protein	7.65567	4.00703e-10
IISANGCKVDNSSLTGESEPQTR(8)-IVEIPFNSTNKYQLSIHK(11)	Carbamidomethyl[C](7)	sp|P05023|AT1A1_HUMAN (212)-sp|P05023|AT1A1_HUMAN (487)/	Intra-Protein	5.45928	3.57613e-08
IISANGCKVDNSSLTGESEPQTR(8)-IVEIPFNSTNKYQLSIHK(11)	Carbamidomethyl[C](7)	sp|P05023|AT1A1_HUMAN (212)-sp|P05023|AT1A1_HUMAN (487)/	Intra-Protein	5.81583	4.37971e-05
YNPNVLPVQCTGKR(13)-FDVKIEVK(4)	Carbamidomethyl[C](10)	sp|P05026|AT1B1_HUMAN (216)-sp|P05026|AT1B1_HUMAN (298)/	Intra-Protein	2.61368	0.0115545
IECKAYGENIGYSEK(4)-YNPNVLPVQCTGKR(13)	Carbamidomethyl[C](3);Carbamidomethyl[C](28)	sp|P05026|AT1B1_HUMAN (277)-sp|P05026|AT1B1_HUMAN (216)/	Intra-Protein	3.26126	0.0380394
IECKAYGENIGYSEK(4)-YNPNVLPVQCTGKR(13)	Carbamidomethyl[C](3);Carbamidomethyl[C](28)	sp|P05026|AT1B1_HUMAN (277)-sp|P05026|AT1B1_HUMAN (216)/	Intra-Protein	0.75288	0.0769825
MEEVTGTKGR(8)-QSKGDINTR(3)	Oxidation[M](1)	sp|P08069|IGF1R_HUMAN (469)-sp|P08069|IGF1R_HUMAN (474)/	Intra-Protein	0.328195	0.0282164
MEEVTGTKGR(8)-QSKGDINTR(3)	Oxidation[M](1)	sp|P08069|IGF1R_HUMAN (469)-sp|P08069|IGF1R_HUMAN (474)/	Intra-Protein	-2.31931	0.141335
MEEVTGTKGR(8)-QSKGDINTR(3)	null	sp|P08069|IGF1R_HUMAN (469)-sp|P08069|IGF1R_HUMAN (474)/	Intra-Protein	-8.52446	0.230619
MEEVTGTKGR(8)-QSKGDINTR(3)	Oxidation[M](1)	sp|P08069|IGF1R_HUMAN (469)-sp|P08069|IGF1R_HUMAN (474)/	Intra-Protein	-8.15574	0.268034
MEEVTGTKGR(8)-QSKGDINTR(3)	Oxidation[M](1)	sp|P08069|IGF1R_HUMAN (469)-sp|P08069|IGF1R_HUMAN (474)/	Intra-Protein	-8.28343	0.269668
GENSWFSTQVDTVATKVK(16)-GLVLGPIHKNQK(9)	null	sp|P08195|4F2_HUMAN (329)-sp|P08195|4F2_HUMAN (266)/	Intra-Protein	-0.465117	5.8999e-11
DIKGESLFQGR(3)-MSAPKNAR(5)	Oxidation[M](15)	sp|P09758|TACD2_HUMAN (231)-sp|P09758|TACD2_HUMAN (84)/	Intra-Protein	-2.94884	0.0920849
DIKGESLFQGR(3)-MSAPKNAR(5)	Oxidation[M](15)	sp|P09758|TACD2_HUMAN (231)-sp|P09758|TACD2_HUMAN (84)/	Intra-Protein	-2.96245	0.100289
DIKGESLFQGR(3)-MSAPKNAR(5)	Oxidation[M](15)	sp|P09758|TACD2_HUMAN (231)-sp|P09758|TACD2_HUMAN (84)/	Intra-Protein	-3.11879	0.143855
LLKFPLGPCPR(3)-SPVKTYPK(4)	Carbamidomethyl[C](9)	sp|P11117|PPAL_HUMAN (153)-sp|P11117|PPAL_HUMAN (49)/	Intra-Protein	-0.410733	0.00337998
LLKFPLGPCPR(3)-SPVKTYPK(4)	Carbamidomethyl[C](9)	sp|P11117|PPAL_HUMAN (153)-sp|P11117|PPAL_HUMAN (49)/	Intra-Protein	1.32777	0.00595524
LLKFPLGPCPR(3)-SPVKTYPK(4)	Carbamidomethyl[C](9)	sp|P11117|PPAL_HUMAN (153)-sp|P11117|PPAL_HUMAN (49)/	Intra-Protein	-7.35963	0.0164554
EKPYDSKSLR(7)-TALQKEITTR(5)	null	sp|P16422|EPCAM_HUMAN (160)-sp|P16422|EPCAM_HUMAN (168)/	Intra-Protein	0.069434	1.80563e-06
EKPYDSKSLR(7)-TALQKEITTR(5)	null	sp|P16422|EPCAM_HUMAN (160)-sp|P16422|EPCAM_HUMAN (168)/	Intra-Protein	0.44438	1.62728e-05
EKPYDSKSLR(7)-TALQKEITTR(5)	null	sp|P16422|EPCAM_HUMAN (160)-sp|P16422|EPCAM_HUMAN (168)/	Intra-Protein	0.638796	6.68408e-05
EKPYDSKSLR(7)-TALQKEITTR(5)	null	sp|P16422|EPCAM_HUMAN (160)-sp|P16422|EPCAM_HUMAN (168)/	Intra-Protein	-3.74509	0.124902
EKPYDSKSLR(7)-TALQKEITTR(5)	null	sp|P16422|EPCAM_HUMAN (160)-sp|P16422|EPCAM_HUMAN (168)/	Intra-Protein	-3.67447	0.15646
EKPYDSKSLR(7)-TALQKEITTR(5)	null	sp|P16422|EPCAM_HUMAN (160)-sp|P16422|EPCAM_HUMAN (168)/	Intra-Protein	-3.53084	0.193657
TALQKEITTR(5)-PYDSKSLR(5)	null	sp|P16422|EPCAM_HUMAN (168)-sp|P16422|EPCAM_HUMAN (160)/	Intra-Protein	-2.59983	0.166178
TALQKEITTR(5)-PYDSKSLR(5)	null	sp|P16422|EPCAM_HUMAN (168)-sp|P16422|EPCAM_HUMAN (160)/	Intra-Protein	-3.01693	0.220814
TALQKEITTR(5)-GESLFHSKK(8)	null	sp|P16422|EPCAM_HUMAN (168)-sp|P16422|EPCAM_HUMAN (229)/	Intra-Protein	1.12562	1.22521e-05
TALQKEITTR(5)-GESLFHSKK(8)	null	sp|P16422|EPCAM_HUMAN (168)-sp|P16422|EPCAM_HUMAN (229)/	Intra-Protein	0.720946	0.00300817
TALQKEITTR(5)-GESLFHSKK(8)	null	sp|P16422|EPCAM_HUMAN (168)-sp|P16422|EPCAM_HUMAN (229)/	Intra-Protein	4.43124	0.00808473
EIKAIASIPTER(3)-NALDTKNLIK(6)	null	sp|P17301|ITA2_HUMAN (330)-sp|P17301|ITA2_HUMAN (323)/	Intra-Protein	0.770483	4.50438e-10
EIKAIASIPTER(3)-NALDTKNLIK(6)	null	sp|P17301|ITA2_HUMAN (330)-sp|P17301|ITA2_HUMAN (323)/	Intra-Protein	1.57296	3.35016e-06
EIKAIASIPTER(3)-NALDTKNLIK(6)	null	sp|P17301|ITA2_HUMAN (330)-sp|P17301|ITA2_HUMAN (323)/	Intra-Protein	0.36809	1.63298e-05
EIKAIASIPTER(3)-NALDTKNLIK(6)	null	sp|P17301|ITA2_HUMAN (330)-sp|P17301|ITA2_HUMAN (323)/	Intra-Protein	2.79555	0.019789
EIKAIASIPTER(3)-NALDTKNLIK(6)	null	sp|P17301|ITA2_HUMAN (330)-sp|P17301|ITA2_HUMAN (323)/	Intra-Protein	2.82562	0.0208604
EIKAIASIPTER(3)-NALDTKNLIK(6)	null	sp|P17301|ITA2_HUMAN (330)-sp|P17301|ITA2_HUMAN (323)/	Intra-Protein	2.21625	0.0259895
DKVAELENSEFR(2)-AFSSFKNR(6)	null	sp|P19256|LFA3_HUMAN (62)-sp|P19256|LFA3_HUMAN (78)/	Intra-Protein	-1.20264	0.0272761
DKVAELENSEFR(2)-AFSSFKNR(6)	null	sp|P19256|LFA3_HUMAN (62)-sp|P19256|LFA3_HUMAN (78)/	Intra-Protein	-4.17388	0.174512
EKPNCLNLQDSCK(2)-FLNFFKDNTCLK(6)	Carbamidomethyl[C](5);Carbamidomethyl[C](12);Carbamidomethyl[C](26)	sp|P56159|GFRA1_HUMAN (240)-sp|P56159|GFRA1_HUMAN (333)/	Intra-Protein	4.89365	0.00116809
EKPNCLNLQDSCK(2)-FLNFFKDNTCLK(6)	Carbamidomethyl[C](5);Carbamidomethyl[C](12);Carbamidomethyl[C](26)	sp|P56159|GFRA1_HUMAN (240)-sp|P56159|GFRA1_HUMAN (333)/	Intra-Protein	-9.51888	0.00707871
EKPNCLNLQDSCK(2)-FLNFFKDNTCLK(6)	Carbamidomethyl[C](5);Carbamidomethyl[C](12);Carbamidomethyl[C](26)	sp|P56159|GFRA1_HUMAN (240)-sp|P56159|GFRA1_HUMAN (333)/	Intra-Protein	5.88709	0.0129277
EKPNCLNLQDSCK(2)-FLNFFKDNTCLK(6)	Carbamidomethyl[C](5);Carbamidomethyl[C](12);Carbamidomethyl[C](26)	sp|P56159|GFRA1_HUMAN (240)-sp|P56159|GFRA1_HUMAN (333)/	Intra-Protein	5.74179	0.0255168
EQSCSTKYR(7)-QKSLYNCR(2)	Carbamidomethyl[C](4);Carbamidomethyl[C](19)	sp|P56159|GFRA1_HUMAN (45)-sp|P56159|GFRA1_HUMAN (82)/	Intra-Protein	-1.55831	0.177403
EQSCSTKYR(7)-QKSLYNCR(2)	Carbamidomethyl[C](4);Carbamidomethyl[C](19)	sp|P56159|GFRA1_HUMAN (45)-sp|P56159|GFRA1_HUMAN (82)/	Intra-Protein	-1.79095	0.293144
VNHVTLSQPKIVK(10)-TPKIQVYSR(3)	null	sp|P61769|B2MG_HUMAN (111)-sp|P61769|B2MG_HUMAN (26)/	Intra-Protein	0.484478	1.03975e-08
STVPTDFSSAKIEVSQLLK(11)-GDASLKMDK(6)	Oxidation[M](29)	sp|Q08722|CD47_HUMAN (85)-sp|Q08722|CD47_HUMAN (99)/	Intra-Protein	1.24162	5.39019e-08
TTEKGWEFHSVELNR(4)-VPKPVLVR(3)	null	sp|Q6UXG2|ELAP1_HUMAN (226)-sp|Q6UXG2|ELAP1_HUMAN (257)/	Intra-Protein	4.1563	0.000113241
WEPPKYDGGSQVTNYILLK(5)-NTVHLSWKPPK(8)	null	sp|Q8WZ42|TITIN_HUMAN (27522)-sp|Q8WZ42|TITIN_HUMAN (16960)/	Intra-Protein	4.14467	0.00775194
MGQKYSFR(4)-KTHAGK(1)	Oxidation[M](1)	sp|Q8WZ42|TITIN_HUMAN (30339)-sp|Q8WZ42|TITIN_HUMAN (31621)/	Intra-Protein	1.13975	0.276492
ALDKPVTVQFR(4)-GNFAGAKLPR(7)	null	sp|Q9HCU4|CELR2_HUMAN (2300)-sp|Q9HCU4|CELR2_HUMAN (2183)/	Intra-Protein	3.3727	0.000852376

## Sheet: Exp.#2
Table S5(b). Crosslinked peptides identified in Exp. #2
Peptide	Modifications	Proteins	Protein_Type	Precursor_Mass_Error(ppm)	Score
TAESHCKEGDQPER(7)-EGGPDHNYTKEK(10)	Carbamidomethyl[C](6)	sp|O60486|PLXC1_HUMAN (355)-sp|O75096|LRP4_HUMAN (1804)/	Inter-Protein	3.33651	0.288451
AGLEKNYCR(5)-TLKCIR(3)	Carbamidomethyl[C](8);Carbamidomethyl[C](16)	sp|P00747|PLMN_HUMAN (528)-sp|Q8NHX9|TPC2_HUMAN (207)/	Inter-Protein	-0.043178	0.068665
PGAPESKCSR(7)-KKAPHR(2)	Carbamidomethyl[C](8)	sp|P04233|HG2A_HUMAN (43)-sp|Q96GP6|SREC2_HUMAN (488)/	Inter-Protein	-6.54882	0.301248
YKKQFR(2)-EPEKR(4)	null	sp|P36888|FLT3_HUMAN (567)-sp|P04844|RPN2_HUMAN (535)/	Inter-Protein	1.03609	0.328658
MGETEK(1)-KLVDR(1)	null	sp|P46721|SO1A2_HUMAN (1)-sp|Q9Y6C5|PTC2_HUMAN (843)/	Inter-Protein	0.368733	0.231797
NAKFYPVTR(3)-EKVNDQAK(2)	null	sp|P54851|EMP2_HUMAN (129)-sp|Q13740|CD166_HUMAN (521)/	Inter-Protein	3.63747	0.209179
NAKFYPVTR(3)-EKVNDQAK(2)	null	sp|P54851|EMP2_HUMAN (129)-sp|Q13740|CD166_HUMAN (521)/	Inter-Protein	1.27626	0.287057
PGDKYEHHSYMGMR(4)-AMRKYAK(4)	Oxidation[M](11);Oxidation[M](13);Oxidation[M](19)	sp|Q9UKY4|POMT2_HUMAN (135)-sp|P58743|S26A5_HUMAN (577)/	Inter-Protein	-0.811153	0.372534
ATFNPAQDKCGIR(9)-EITIHTKLPAK(7)	Carbamidomethyl[C](10)	sp|O00592|PODXL_HUMAN (394)-sp|O00592|PODXL_HUMAN (418)/	Intra-Protein	1.66496	0.018429
ATFNPAQDKCGIR(9)-EITIHTKLPAK(7)	Carbamidomethyl[C](10)	sp|O00592|PODXL_HUMAN (394)-sp|O00592|PODXL_HUMAN (418)/	Intra-Protein	1.58819	0.0214621
LKDKWDELK(2)-LPAKDVYER(4)	null	sp|O00592|PODXL_HUMAN (429)-sp|O00592|PODXL_HUMAN (422)/	Intra-Protein	-3.39051	0.0234531
LKDKWDELK(2)-LPAKDVYER(4)	null	sp|O00592|PODXL_HUMAN (429)-sp|O00592|PODXL_HUMAN (422)/	Intra-Protein	-3.55451	0.0388904
KGTKFTTK(4)-WKFNR(2)	null	sp|O43173|SIA8C_HUMAN (345)-sp|O43173|SIA8C_HUMAN (91)/	Intra-Protein	8.88932	0.335925
ENINVKQVFER(6)-VKTVYR(2)	null	sp|O95716|RAB3D_HUMAN (173)-sp|O95716|RAB3D_HUMAN (62)/	Intra-Protein	2.54712	0.046578
ENINVKQVFER(6)-VKTVYR(2)	null	sp|O95716|RAB3D_HUMAN (173)-sp|O95716|RAB3D_HUMAN (62)/	Intra-Protein	2.78327	0.0538346
ENINVKQVFER(6)-VKTVYR(2)	null	sp|O95716|RAB3D_HUMAN (173)-sp|O95716|RAB3D_HUMAN (62)/	Intra-Protein	3.69318	0.178647
LVYLVENPGGYVAYSKAATVTGK(16)-DQHFVKIQVK(6)	null	sp|P02786|TFR1_HUMAN (224)-sp|P02786|TFR1_HUMAN (189)/	Intra-Protein	-0.288698	0.000512401
LVYLVENPGGYVAYSKAATVTGK(16)-DQHFVKIQVK(6)	null	sp|P02786|TFR1_HUMAN (224)-sp|P02786|TFR1_HUMAN (189)/	Intra-Protein	-0.844923	0.00196017
LVYLVENPGGYVAYSKAATVTGK(16)-DQHFVKIQVK(6)	null	sp|P02786|TFR1_HUMAN (224)-sp|P02786|TFR1_HUMAN (189)/	Intra-Protein	-0.957915	0.00202261
LFGNMEGDCPSDWKTDSTCR(14)-AGKITFAEK(3)	Carbamidomethyl[C](9);Carbamidomethyl[C](19);Oxidation[M](5)	sp|P02786|TFR1_HUMAN (358)-sp|P02786|TFR1_HUMAN (261)/	Intra-Protein	-7.19608	0.0718589
IISANGCKVDNSSLTGESEPQTR(8)-IVEIPFNSTNKYQLSIHK(11)	Carbamidomethyl[C](7)	sp|P05023|AT1A1_HUMAN (212)-sp|P05023|AT1A1_HUMAN (487)/	Intra-Protein	-0.281735	1.73517e-05
IISANGCKVDNSSLTGESEPQTR(8)-IVEIPFNSTNKYQLSIHK(11)	Carbamidomethyl[C](7)	sp|P05023|AT1A1_HUMAN (212)-sp|P05023|AT1A1_HUMAN (487)/	Intra-Protein	-0.505559	0.00117345
IISANGCKVDNSSLTGESEPQTR(8)-IVEIPFNSTNKYQLSIHK(11)	Carbamidomethyl[C](7)	sp|P05023|AT1A1_HUMAN (212)-sp|P05023|AT1A1_HUMAN (487)/	Intra-Protein	-0.985545	0.0124086
IISANGCKVDNSSLTGESEPQTR(8)-IVEIPFNSTNKYQLSIHK(11)	Carbamidomethyl[C](7)	sp|P05023|AT1A1_HUMAN (212)-sp|P05023|AT1A1_HUMAN (487)/	Intra-Protein	-1.88824	0.0733591
IISANGCKVDNSSLTGESEPQTR(8)-IVEIPFNSTNKYQLSIHK(11)	Carbamidomethyl[C](7)	sp|P05023|AT1A1_HUMAN (212)-sp|P05023|AT1A1_HUMAN (487)/	Intra-Protein	1.19796	0.286167
AAVPDAVGKCR(9)-KNCLVK(1)	Carbamidomethyl[C](10);Carbamidomethyl[C](17)	sp|P05023|AT1A1_HUMAN (605)-sp|P05023|AT1A1_HUMAN (354)/sp|P05023|AT1A1_HUMAN (605)-sp|P13637|AT1A3_HUMAN (344)/sp|P13637|AT1A3_HUMAN (595)-sp|P05023|AT1A1_HUMAN (354)/sp|P13637|AT1A3_HUMAN (595)-sp|P13637|AT1A3_HUMAN (344)/	Intra-Protein	-3.9249	0.156597
DMTSEQLDDILKYHTEIVFAR(12)-DAKACVVHGSDLK(3)	Oxidation[M](2);Carbamidomethyl[C](29)	sp|P05023|AT1A1_HUMAN (683)-sp|P05023|AT1A1_HUMAN (661)/	Intra-Protein	3.80771	0.0210723
YNPNVLPVQCTGKR(13)-FDVKIEVK(4)	Carbamidomethyl[C](10)	sp|P05026|AT1B1_HUMAN (216)-sp|P05026|AT1B1_HUMAN (298)/	Intra-Protein	3.59793	0.111055
YNPNVLPVQCTGKR(13)-FDVKIEVK(4)	Carbamidomethyl[C](10)	sp|P05026|AT1B1_HUMAN (216)-sp|P05026|AT1B1_HUMAN (298)/	Intra-Protein	4.06669	0.146352
YNPNVLPVQCTGKR(13)-FDVKIEVK(4)	Carbamidomethyl[C](10)	sp|P05026|AT1B1_HUMAN (216)-sp|P05026|AT1B1_HUMAN (298)/	Intra-Protein	5.57803	0.246462
IECKAYGENIGYSEK(4)-YNPNVLPVQCTGKR(13)	Carbamidomethyl[C](3);Carbamidomethyl[C](28)	sp|P05026|AT1B1_HUMAN (277)-sp|P05026|AT1B1_HUMAN (216)/	Intra-Protein	-7.7839	0.0762123
IECKAYGENIGYSEK(4)-YNPNVLPVQCTGKR(13)	Carbamidomethyl[C](3);Carbamidomethyl[C](28)	sp|P05026|AT1B1_HUMAN (277)-sp|P05026|AT1B1_HUMAN (216)/	Intra-Protein	-8.07512	0.0881657
IECKAYGENIGYSEK(4)-YNPNVLPVQCTGKR(13)	Carbamidomethyl[C](3);Carbamidomethyl[C](28)	sp|P05026|AT1B1_HUMAN (277)-sp|P05026|AT1B1_HUMAN (216)/	Intra-Protein	-8.22863	0.0949904
IECKAYGENIGYSEK(4)-YNPNVLPVQCTGKR(13)	Carbamidomethyl[C](3);Carbamidomethyl[C](28)	sp|P05026|AT1B1_HUMAN (277)-sp|P05026|AT1B1_HUMAN (216)/	Intra-Protein	-2.53124	0.128315
IECKAYGENIGYSEK(4)-YNPNVLPVQCTGKR(13)	Carbamidomethyl[C](3);Carbamidomethyl[C](28)	sp|P05026|AT1B1_HUMAN (277)-sp|P05026|AT1B1_HUMAN (216)/	Intra-Protein	-2.53124	0.14456
IECKAYGENIGYSEK(4)-YNPNVLPVQCTGKR(13)	Carbamidomethyl[C](3);Carbamidomethyl[C](28)	sp|P05026|AT1B1_HUMAN (277)-sp|P05026|AT1B1_HUMAN (216)/	Intra-Protein	-3.50112	0.226376
IECKAYGENIGYSEK(4)-DEDKDK(4)	Carbamidomethyl[C](3)	sp|P05026|AT1B1_HUMAN (277)-sp|P05026|AT1B1_HUMAN (221)/	Intra-Protein	-0.173768	0.0120597
IECKAYGENIGYSEK(4)-DEDKDK(4)	Carbamidomethyl[C](3)	sp|P05026|AT1B1_HUMAN (277)-sp|P05026|AT1B1_HUMAN (221)/	Intra-Protein	-0.157147	0.0569723
PNDPKSYEAYVLNIVR(5)-IEVKS(4)	null	sp|P05026|AT1B1_HUMAN (96)-sp|P05026|AT1B1_HUMAN (302)/	Intra-Protein	2.03986	0.166743
PNDPKSYEAYVLNIVR(5)-IEVKS(4)	null	sp|P05026|AT1B1_HUMAN (96)-sp|P05026|AT1B1_HUMAN (302)/	Intra-Protein	2.24253	0.229669
DIIKGEAETR(4)-EKITLLR(2)	null	sp|P06213|INSR_HUMAN (1047)-sp|P06213|INSR_HUMAN (1022)/	Intra-Protein	-0.789271	0.207566
MEEVTGTKGR(8)-QSKGDINTR(3)	Oxidation[M](1)	sp|P08069|IGF1R_HUMAN (469)-sp|P08069|IGF1R_HUMAN (474)/	Intra-Protein	-0.520374	0.0247191
MEEVTGTKGR(8)-QSKGDINTR(3)	Oxidation[M](1)	sp|P08069|IGF1R_HUMAN (469)-sp|P08069|IGF1R_HUMAN (474)/	Intra-Protein	0.79153	0.279783
KVFENFLHNSIFVPRPER(1)-QAEKEEAEYR(4)	null	sp|P08069|IGF1R_HUMAN (720)-sp|P08069|IGF1R_HUMAN (713)/	Intra-Protein	0.145627	3.40857e-05
KVFENFLHNSIFVPRPER(1)-QAEKEEAEYR(4)	null	sp|P08069|IGF1R_HUMAN (720)-sp|P08069|IGF1R_HUMAN (713)/	Intra-Protein	0.245659	0.000130587
DIKGESLFQGR(3)-MSAPKNAR(5)	Oxidation[M](15)	sp|P09758|TACD2_HUMAN (231)-sp|P09758|TACD2_HUMAN (84)/	Intra-Protein	1.18964	0.0384259
DIKGESLFQGR(3)-MSAPKNAR(5)	Oxidation[M](15)	sp|P09758|TACD2_HUMAN (231)-sp|P09758|TACD2_HUMAN (84)/	Intra-Protein	1.37364	0.165481
DIKGESLFQGR(3)-MSAPKNAR(5)	Oxidation[M](15)	sp|P09758|TACD2_HUMAN (231)-sp|P09758|TACD2_HUMAN (84)/	Intra-Protein	1.12508	0.170149
FTLTGLKPDTTYDIK(7)-TMPVEQVFAKNFR(10)	Oxidation[M](20)	sp|P10586|PTPRF_HUMAN (979)-sp|P10586|PTPRF_HUMAN (1016)/	Intra-Protein	-9.38016	0.00244081
LLKFPLGPCPR(3)-SPVKTYPK(4)	Carbamidomethyl[C](9)	sp|P11117|PPAL_HUMAN (153)-sp|P11117|PPAL_HUMAN (49)/	Intra-Protein	0.965455	0.116613
LLKFPLGPCPR(3)-SPVKTYPK(4)	Carbamidomethyl[C](9)	sp|P11117|PPAL_HUMAN (153)-sp|P11117|PPAL_HUMAN (49)/	Intra-Protein	1.19652	0.143814
ANVDKVFFDLMR(5)-QVSVEEAKNR(8)	Oxidation[M](11)	sp|P11233|RALA_HUMAN (166)-sp|P11233|RALA_HUMAN (143)/	Intra-Protein	2.31408	0.0505586
ANVDKVFFDLMR(5)-QVSVEEAKNR(8)	Oxidation[M](11)	sp|P11233|RALA_HUMAN (166)-sp|P11233|RALA_HUMAN (143)/	Intra-Protein	3.3927	0.0759367
EKPYDSKSLR(2)-TALQKEITTR(5)	null	sp|P16422|EPCAM_HUMAN (155)-sp|P16422|EPCAM_HUMAN (168)/	Intra-Protein	1.12563	0.362545
EKPYDSKSLR(7)-TALQKEITTR(5)	null	sp|P16422|EPCAM_HUMAN (160)-sp|P16422|EPCAM_HUMAN (168)/	Intra-Protein	0.672124	0.00651631
EKPYDSKSLR(7)-TALQKEITTR(5)	null	sp|P16422|EPCAM_HUMAN (160)-sp|P16422|EPCAM_HUMAN (168)/	Intra-Protein	1.27164	0.0252091
EKPYDSKSLR(7)-TALQKEITTR(5)	null	sp|P16422|EPCAM_HUMAN (160)-sp|P16422|EPCAM_HUMAN (168)/	Intra-Protein	0.998664	0.0406203
EKPYDSKSLR(7)-TALQKEITTR(5)	null	sp|P16422|EPCAM_HUMAN (160)-sp|P16422|EPCAM_HUMAN (168)/	Intra-Protein	0.922882	0.0615315
EKPYDSKSLR(7)-TALQKEITTR(5)	null	sp|P16422|EPCAM_HUMAN (160)-sp|P16422|EPCAM_HUMAN (168)/	Intra-Protein	-0.137282	0.0724527
EKPYDSKSLR(7)-TALQKEITTR(5)	null	sp|P16422|EPCAM_HUMAN (160)-sp|P16422|EPCAM_HUMAN (168)/	Intra-Protein	1.08556	0.0940541
EKPYDSKSLR(7)-TALQKEITTR(5)	null	sp|P16422|EPCAM_HUMAN (160)-sp|P16422|EPCAM_HUMAN (168)/	Intra-Protein	0.805835	0.101134
EKPYDSKSLR(7)-TALQKEITTR(5)	null	sp|P16422|EPCAM_HUMAN (160)-sp|P16422|EPCAM_HUMAN (168)/	Intra-Protein	1.33988	0.151793
EKPYDSKSLR(7)-TALQKEITTR(5)	null	sp|P16422|EPCAM_HUMAN (160)-sp|P16422|EPCAM_HUMAN (168)/	Intra-Protein	0.885982	0.167223
TALQKEITTR(5)-PYDSKSLR(5)	null	sp|P16422|EPCAM_HUMAN (168)-sp|P16422|EPCAM_HUMAN (160)/	Intra-Protein	0.758651	0.0193449
TALQKEITTR(5)-PYDSKSLR(5)	null	sp|P16422|EPCAM_HUMAN (168)-sp|P16422|EPCAM_HUMAN (160)/	Intra-Protein	-0.125484	0.203962
TALQKEITTR(5)-PYDSKSLR(5)	null	sp|P16422|EPCAM_HUMAN (168)-sp|P16422|EPCAM_HUMAN (160)/	Intra-Protein	-0.610632	0.264146
TALQKEITTR(5)-GESLFHSKK(8)	null	sp|P16422|EPCAM_HUMAN (168)-sp|P16422|EPCAM_HUMAN (229)/	Intra-Protein	-4.82648	0.0333545
TALQKEITTR(5)-GESLFHSKK(8)	null	sp|P16422|EPCAM_HUMAN (168)-sp|P16422|EPCAM_HUMAN (229)/	Intra-Protein	-3.59486	0.0432618
TALQKEITTR(5)-GESLFHSKK(8)	null	sp|P16422|EPCAM_HUMAN (168)-sp|P16422|EPCAM_HUMAN (229)/	Intra-Protein	-4.00511	0.0576672
TALQKEITTR(5)-GESLFHSKK(8)	null	sp|P16422|EPCAM_HUMAN (168)-sp|P16422|EPCAM_HUMAN (229)/	Intra-Protein	-4.6883	0.0658505
EIKAIASIPTER(3)-NALDTKNLIK(6)	null	sp|P17301|ITA2_HUMAN (330)-sp|P17301|ITA2_HUMAN (323)/	Intra-Protein	-3.12703	0.0277367
EIKAIASIPTER(3)-NALDTKNLIK(6)	null	sp|P17301|ITA2_HUMAN (330)-sp|P17301|ITA2_HUMAN (323)/	Intra-Protein	-3.62231	0.035516
SLGTKLAEEMR(5)-KLTSNFR(1)	Oxidation[M](10)	sp|P18084|ITB5_HUMAN (163)-sp|P18084|ITB5_HUMAN (170)/	Intra-Protein	2.51022	0.0492159
DKVAELENSEFR(2)-AFSSFKNR(6)	null	sp|P19256|LFA3_HUMAN (62)-sp|P19256|LFA3_HUMAN (78)/	Intra-Protein	2.7428	0.0927576
QKDKVAELENSEFR(4)-AFSSFKNR(6)	null	sp|P19256|LFA3_HUMAN (62)-sp|P19256|LFA3_HUMAN (78)/	Intra-Protein	-1.74777	0.0972466
QKDKVAELENSEFR(4)-AFSSFKNR(6)	null	sp|P19256|LFA3_HUMAN (62)-sp|P19256|LFA3_HUMAN (78)/	Intra-Protein	-2.60658	0.201924
DKVAELENSEFR(2)-AFSSFKNR(6)	null	sp|P19256|LFA3_HUMAN (62)-sp|P19256|LFA3_HUMAN (78)/	Intra-Protein	7.25578	0.267722
TCDLVGEKGK(8)-ELALVKR(6)	Carbamidomethyl[C](2)	sp|P20645|MPRD_HUMAN (38)-sp|P20645|MPRD_HUMAN (50)/	Intra-Protein	10.0075	0.276394
EVQEFYKDTYNKLK(12)-TKDEPQR(2)	null	sp|P21926|CD9_HUMAN (131)-sp|P21926|CD9_HUMAN (135)/	Intra-Protein	2.43481	0.272436
VMFKITAR(4)-DKFLGR(2)	Oxidation[M](2)	sp|P54709|AT1B3_HUMAN (274)-sp|P54709|AT1B3_HUMAN (266)/	Intra-Protein	0.982724	0.217674
EKPNCLNLQDSCK(2)-FLNFFKDNTCLK(6)	Carbamidomethyl[C](5);Carbamidomethyl[C](12);Carbamidomethyl[C](26)	sp|P56159|GFRA1_HUMAN (240)-sp|P56159|GFRA1_HUMAN (333)/	Intra-Protein	1.03448	0.164951
EKPNCLNLQDSCK(2)-FLNFFKDNTCLK(6)	Carbamidomethyl[C](5);Carbamidomethyl[C](12);Carbamidomethyl[C](26)	sp|P56159|GFRA1_HUMAN (240)-sp|P56159|GFRA1_HUMAN (333)/	Intra-Protein	1.69536	0.179587
EKPNCLNLQDSCK(2)-FLNFFKDNTCLK(6)	Carbamidomethyl[C](5);Carbamidomethyl[C](12);Carbamidomethyl[C](26)	sp|P56159|GFRA1_HUMAN (240)-sp|P56159|GFRA1_HUMAN (333)/	Intra-Protein	1.93095	0.291752
VNHVTLSQPKIVK(10)-TPKIQVYSR(3)	null	sp|P61769|B2MG_HUMAN (111)-sp|P61769|B2MG_HUMAN (26)/	Intra-Protein	3.10675	0.079022
VNHVTLSQPKIVK(10)-TPKIQVYSR(3)	null	sp|P61769|B2MG_HUMAN (111)-sp|P61769|B2MG_HUMAN (26)/	Intra-Protein	3.41327	0.176884
ALAAPAAEEKEEAR(10)-EKMLAAK(2)	Oxidation[M](20)	sp|Q01650|LAT1_HUMAN (19)-sp|Q01650|LAT1_HUMAN (25)/	Intra-Protein	1.21455	0.157504
FVASNQKTIQPPR(7)-TLKYR(3)	null	sp|Q08722|CD47_HUMAN (297)-sp|Q08722|CD47_HUMAN (166)/	Intra-Protein	1.17788	0.171539
FVASNQKTIQPPR(7)-TLKYR(3)	null	sp|Q08722|CD47_HUMAN (297)-sp|Q08722|CD47_HUMAN (166)/	Intra-Protein	1.84997	0.275968
KAVEEPLNAFK(1)-ESKGMMNDE(3)	Oxidation[M](19);Oxidation[M](20)	sp|Q08722|CD47_HUMAN (304)-sp|Q08722|CD47_HUMAN (317)/	Intra-Protein	1.51804	0.0443695
KAVEEPLNAFK(1)-ESKGMMNDE(3)	Oxidation[M](19);Oxidation[M](20)	sp|Q08722|CD47_HUMAN (304)-sp|Q08722|CD47_HUMAN (317)/	Intra-Protein	1.67445	0.252535
STVPTDFSSAKIEVSQLLK(11)-GDASLKMDK(6)	Oxidation[M](29)	sp|Q08722|CD47_HUMAN (85)-sp|Q08722|CD47_HUMAN (99)/	Intra-Protein	-0.339369	0.0155999
STVPTDFSSAKIEVSQLLK(11)-GDASLKMDK(6)	Oxidation[M](29)	sp|Q08722|CD47_HUMAN (85)-sp|Q08722|CD47_HUMAN (99)/	Intra-Protein	0.285386	0.0171289
STVPTDFSSAKIEVSQLLK(11)-GDASLKMDK(6)	Oxidation[M](29)	sp|Q08722|CD47_HUMAN (85)-sp|Q08722|CD47_HUMAN (99)/	Intra-Protein	0.311904	0.0231477
LDVPQNLMFGKWK(11)-SSTKK(4)	Oxidation[M](8)	sp|Q13740|CD166_HUMAN (55)-sp|Q13740|CD166_HUMAN (75)/sp|Q13740|CD166_HUMAN (55)-sp|Q6PK18|OGFD3_HUMAN (27)/	Intra-Protein	-5.08115	0.0651539
PAFSNALEPDFKATSITVTGSGSCR(12)-IAEDDGKPR(7)	Carbamidomethyl[C](24)	sp|Q14118|DAG1_HUMAN (701)-sp|Q14118|DAG1_HUMAN (687)/	Intra-Protein	5.7606	0.173895
PAFSNALEPDFKATSITVTGSGSCR(12)-IAEDDGKPR(7)	Carbamidomethyl[C](24)	sp|Q14118|DAG1_HUMAN (701)-sp|Q14118|DAG1_HUMAN (687)/	Intra-Protein	6.30314	0.200749
QFIPNVAEKTLGASGR(9)-YEGKISR(4)	null	sp|Q15465|SHH_HUMAN (54)-sp|Q15465|SHH_HUMAN (65)/	Intra-Protein	5.2528	0.265427
VADPPR(1)-KNPYR(1)	null	sp|Q15758|AAAT_HUMAN (2)-sp|Q15758|AAAT_HUMAN (331)/	Intra-Protein	-7.96165	0.00626352
VADPPR(1)-KNPYR(1)	null	sp|Q15758|AAAT_HUMAN (2)-sp|Q15758|AAAT_HUMAN (331)/	Intra-Protein	-8.5104	0.101563
YKFMSR(2)-KKNGK(2)	null	sp|Q32M45|ANO4_HUMAN (197)-sp|Q32M45|ANO4_HUMAN (945)/	Intra-Protein	5.6681	0.267031
TTEKGWEFHSVELNR(4)-VPKPVLVR(3)	null	sp|Q6UXG2|ELAP1_HUMAN (226)-sp|Q6UXG2|ELAP1_HUMAN (257)/	Intra-Protein	2.96918	0.105185
DGSLSDKR(7)-KGISR(1)	null	sp|Q8N8Z6|DCBD1_HUMAN (246)-sp|Q8N8Z6|DCBD1_HUMAN (223)/	Intra-Protein	0.997556	0.309976
ENKVPCLECNYK(3)-EGQDISKR(7)	Carbamidomethyl[C](6);Carbamidomethyl[C](9)	sp|Q8WZ42|TITIN_HUMAN (29819)-sp|Q8WZ42|TITIN_HUMAN (31106)/	Intra-Protein	-4.55351	0.313408
ALDKPVTVQFR(4)-LDKGNFAGAK(3)	null	sp|Q9HCU4|CELR2_HUMAN (2300)-sp|Q9HCU4|CELR2_HUMAN (2176)/	Intra-Protein	5.34563	0.123996
ALDKPVTVQFR(4)-LDKGNFAGAK(3)	null	sp|Q9HCU4|CELR2_HUMAN (2300)-sp|Q9HCU4|CELR2_HUMAN (2176)/	Intra-Protein	6.74732	0.130011
ALDKPVTVQFR(4)-GNFAGAKLPR(7)	null	sp|Q9HCU4|CELR2_HUMAN (2300)-sp|Q9HCU4|CELR2_HUMAN (2183)/	Intra-Protein	5.02506	0.102265
ALDKPVTVQFR(4)-GNFAGAKLPR(7)	null	sp|Q9HCU4|CELR2_HUMAN (2300)-sp|Q9HCU4|CELR2_HUMAN (2183)/	Intra-Protein	6.52176	0.129665
ALDKPVTVQFR(4)-GNFAGAKLPR(7)	null	sp|Q9HCU4|CELR2_HUMAN (2300)-sp|Q9HCU4|CELR2_HUMAN (2183)/	Intra-Protein	5.02506	0.148071
DDSQLNGDSSALLNPSKECEPYR(17)-YVKSR(3)	Carbamidomethyl[C](19)	sp|Q9NV96|CC50A_HUMAN (155)-sp|Q9NV96|CC50A_HUMAN (136)/	Intra-Protein	1.26662	0.272481
VGMDGTNQSVVIETKISR(15)-KTCYEMK(1)	Oxidation[M](3);Carbamidomethyl[C](24);Oxidation[M](27)	sp|Q9NZR2|LRP1B_HUMAN (3172)-sp|Q9NZR2|LRP1B_HUMAN (1567)/	Intra-Protein	0.494696	0.24061
YISIGSEAEKNK(10)-TQKLSFIIR(3)	null	sp|Q9UIQ6|LCAP_HUMAN (890)-sp|Q9UIQ6|LCAP_HUMAN (923)/	Intra-Protein	-0.492751	0.000361134
ILKLSPETGPR(3)-ALSPKR(5)	null	sp|Q9UIW2|PLXA1_HUMAN (868)-sp|Q9UIW2|PLXA1_HUMAN (954)/	Intra-Protein	1.58231	0.312831
