# Supplementary material for: Unraveling the surface glycoprotein interaction network by integrating chemical crosslinking with MS-based proteomics
Source: PubMed Central journal article supplement — Chem Sci. 2021 Jan 4;12(6):2146–55. doi: 10.1039/d0sc06327d (PMC8179341; doi:10.1039/d0sc06327d), 2021-01-04
Supplement: SC-012-D0SC06327D-s001.pdf [file SC-012-D0SC06327D-s001.pdf]

## **Supplementary Information**

### **Unraveling the Surface Glycoprotein Interaction Network by Integrating Chemical Crosslinking with MS-Based Proteomics**

Fangxu Sun, Suttipong Suttapitugsakul and Ronghu Wu\*

School of Chemistry and Biochemistry and the Petit Institute for Bioengineering and Bioscience,  
Georgia Institute of Technology, Atlanta, Georgia 30332, USA

\*Corresponding author: Phone: 404-385-1515; Fax: 404-894-7452.

E-mail: ronghu.wu@chemistry.gatech.edu

## Supplementary Tables

**Table S1.** Identified and quantified proteins in the experiment.

**Table S2.** Identification of 657 N-glycosylation sites on 328 glycoproteins.

**Table S3.** Protein domains from the identified proteins with fold change >2 and  $P < 0.05$ .

**Table S4.** Protein-protein interactions extracted from IntAct.

**Table S5.** Crosslinked peptides identified in the duplicate experiments.

## Supplementary Figures

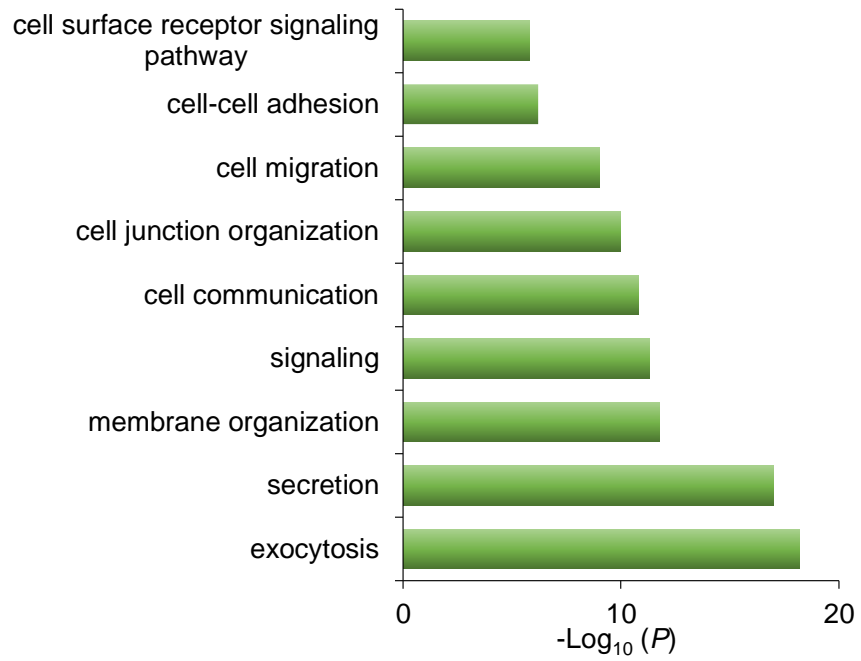

**Figure S1.** Protein clustering of enriched proteins based on biological process.

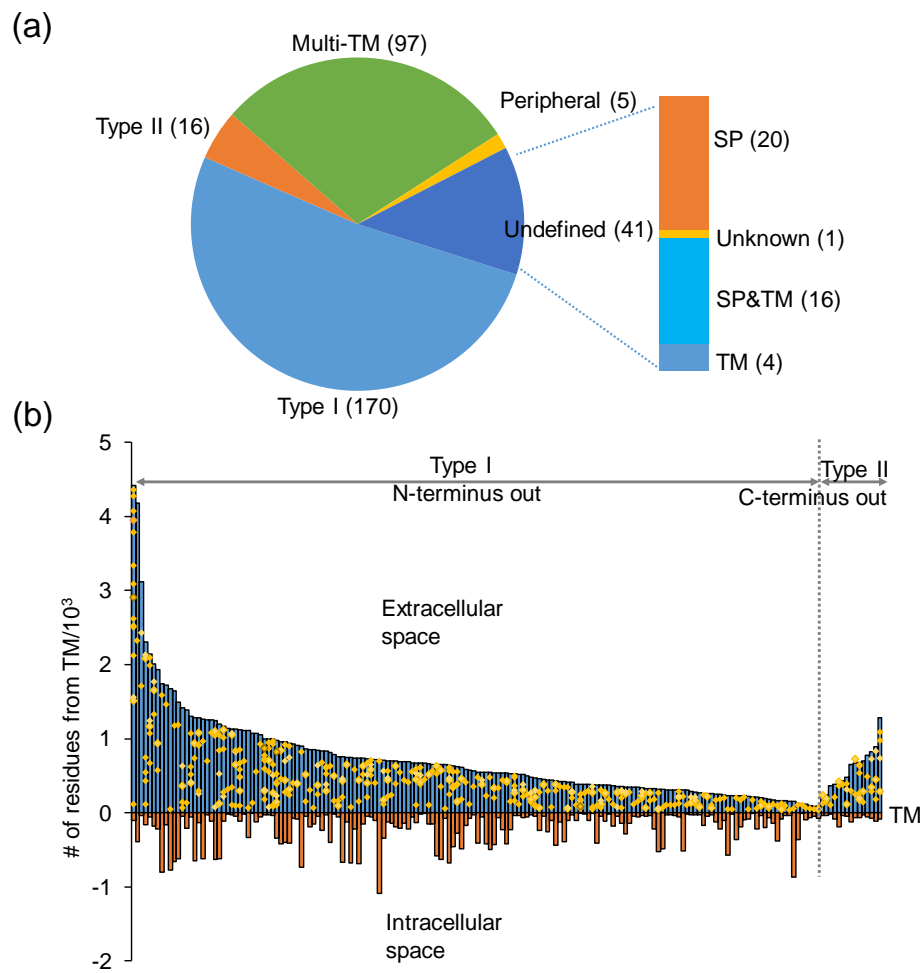

**Figure S2.** (a) Classification of identified surface N-glycoproteins. (b) Site location of the type I and II N-glycoproteins based on the transmembrane domain (TM).

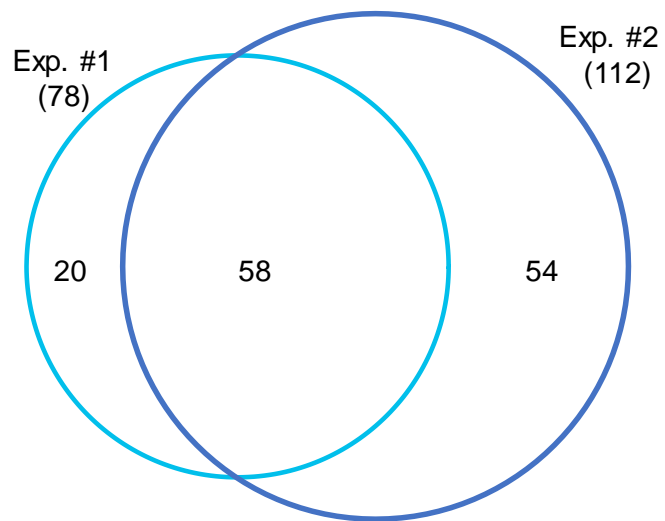

**Figure S3.** Overlap of the crosslinked peptides identified from the biological duplicate experiments.
